# Supplementary material
Source: publisher site journal article supplement (https://www.dovepress.com/get_supplementary_file.php?f=307015.xlsx)
Supplement: Supplementary file 1 [file get_supplementary_file.php]

## Sheet: Table S1
Table S1. Components of each herb in CSMFCH
Herb_name	Mol ID	Molecule Name	MW	AlogP	Hdon	Hacc	OB (%)	Caco-2	BBB	DL	FASA-	HL
Cuscutae Semen	MOL000024	alpha-humulene	204.39	5.04	0	0	22.98	1.88	2.08	0.06	0
Cuscutae Semen	MOL000098	quercetin	302.25	1.5	5	7	46.43	0.05	-0.77	0.28	0.38	14.4
Cuscutae Semen	MOL000118	(L)-alpha-Terpineol	154.28	2.42	1	1	48.8	1.39	1.72	0.03	0.27	11.35
Cuscutae Semen	MOL000172	Furol	96.09	0.99	0	2	34.35	1.08	1.51	0.01	0.2	4.53
Cuscutae Semen	MOL000184	NSC63551	412.77	7.56	0	1	39.25	1.42	1.22	0.76	0.22	5.78
Cuscutae Semen	MOL000198	(R)-linalool	154.28	2.74	1	1	39.8	1.33	1.36	0.02	0.32	6.48
Cuscutae Semen	MOL000244	()-Borneol	154.28	1.98	1	1	81.8	1.22	1.47	0.05	0.24	11.36
Cuscutae Semen	MOL000354	isorhamnetin	316.28	1.76	4	7	49.6	0.31	-0.54	0.31	0.32	14.34
Cuscutae Semen	MOL000357	Sitogluside	576.95	6.34	4	6	20.63	-0.14	-0.93	0.62	0.23
Cuscutae Semen	MOL000358	beta-sitosterol	414.79	8.08	1	1	36.91	1.32	0.99	0.75	0.23	5.36
Cuscutae Semen	MOL000361	Amyrin	426.8	7.3	1	1	17.6	1.45	1.29	0.76	0.22
Cuscutae Semen	MOL000422	kaempferol	286.25	1.77	4	6	41.88	0.26	-0.55	0.24	0	14.74
Cuscutae Semen	MOL000668	PENTYLFURAN	138.23	3.12	0	1	54.59	1.72	1.94	0.02	0.1	-1.96
Cuscutae Semen	MOL000705	WLN: VH6	114.21	2.31	0	1	19.59	1.29	1.49	0.01	0.23
Cuscutae Semen	MOL000885	Dodekan	170.38	5.85	0	0	17.74	1.79	1.96	0.02	0.16
Cuscutae Semen	MOL000953	CLR	386.73	7.38	1	1	37.87	1.43	1.13	0.68	0.2	4.52
Cuscutae Semen	MOL001558	sesamin	354.38	2.24	0	6	56.55	0.75	-0.08	0.83	0.31	13.44
Cuscutae Semen	MOL001842	Pinoresinol	358.42	2.13	2	6	4.25	0.52	-0.25	0.52	0
Cuscutae Semen	MOL002016	10579-93-8	204.39	4.75	0	0	27.36	1.85	2.09	0.09	0.29
Cuscutae Semen	MOL004368	Hyperin	464.41	-0.59	8	12	6.94	-1.42	-2.08	0.77	0
Cuscutae Semen	MOL005043	campest-5-en-3beta-ol	400.76	7.63	1	1	37.58	1.32	0.94	0.71	0.23	4.43
Cuscutae Semen	MOL005440	Isofucosterol	412.77	7.83	1	1	43.78	1.36	0.97	0.76	0.24	5.18
Cuscutae Semen	MOL005944	matrine	248.41	1.42	0	3	63.77	1.39	1.52	0.25	0	6.69
Cuscutae Semen	MOL006649	sophranol	264.41	0.67	1	4	55.42	0.6	0.68	0.28	0.19	4.94
Cuscutae Semen	MOL006735	Furfuranol	98.11	0.62	1	2	48.27	0.82	0.91	0.01	0.13	4.26
Cuscutae Semen	MOL007228	kaempferol-3-o-beta-d-glucoside	448.41	-0.32	7	11	2.77	-1.29	-1.99	0.74	0.31
Cuscutae Semen	MOL009302	ZINC02034518	72.12	0.64	1	1	57.57	1	1.21	0	0.34	11.74
Cuscutae Semen	MOL009303	Cuscutoside B	664.67	-1.17	6	16	47.56	-1.62	-2.59	0.18	0.24	21.82
Cuscutae Semen	MOL009304	InChI=1/C12H16N2O/c1-13-6-9-5-10(8-13)11-3-2-4-12(15)14(11)7-9/h2-4,9-10H,5-8H2,1H	204.3	0.2	0	3	76.82	1.22	1.46	0.11	0.22	1.77
Cuscutae Semen	MOL000561	Astragalin	448.41	-0.32	7	11	14.03	-1.34	-1.97	0.74	0.34
Cuscutae Semen	MOL005438	campesterol	400.76	7.63	1	1	37.58	1.34	0.95	0.71	0.22	4.83
Cuscutae Semen	MOL008172	daucosterol	576.95	6.34	4	6	3.65	-0.12	-0.73	0.63	0.21
Cuscutae Semen	MOL000558	quercetin-3-l-arabinon-7-d-glucoside	612.54	-2.32	11	17	5.82	-2.69	-3.74	0.69	0.31
Cuscutae Semen	MOL005567	vitamin a	286.5	5.32	1	1	19.53	1.38	0.86	0.16	0.29
Mori Fructus	MOL000002	cyanidol	287.26	1.67	5	6	1.36	0.17	-0.51	0.24	0.34
Mori Fructus	MOL000069	palmitic acid	256.48	6.37	1	2	19.3	1.09	1	0.1	0
Mori Fructus	MOL000098	quercetin	302.25	1.5	5	7	46.43	0.05	-0.77	0.28	0.38	14.4
Mori Fructus	MOL000122	1,8-cineole	154.28	2.15	0	1	39.73	1.57	2.06	0.05	0.24	11.29
Mori Fructus	MOL000123	geraniol	154.28	2.93	1	1	23.93	1.19	1.14	0.02	0.27
Mori Fructus	MOL000125	(-)-alpha-Pinene	136.26	2.87	0	0	46.25	1.85	2.3	0.05	0.25	11.42
Mori Fructus	MOL000130	CAM	152.26	1.94	0	1	67.17	1.29	1.71	0.05	0.27	11.34
Mori Fructus	MOL000131	EIC	280.5	6.39	1	2	41.9	1.16	0.9	0.14	0.25	7.5
Mori Fructus	MOL000198	(R)-linalool	154.28	2.74	1	1	39.8	1.33	1.36	0.02	0.32	6.48
Mori Fructus	MOL000303	caprylic acid	144.24	2.72	1	2	16.4	0.9	1.02	0.02	0
Mori Fructus	MOL000346	succinic acid	118.1	-0.41	2	4	29.62	-0.44	-0.71	0.01	0.42
Mori Fructus	MOL000415	rutin	610.57	-1.45	10	16	3.2	-1.93	-2.75	0.68	0
Mori Fructus	MOL000432	linolenic acid	278.48	5.95	1	2	45.01	1.21	0.84	0.15	0	5.54
Mori Fructus	MOL000602	FUM	116.08	-0.01	2	4	17.74	-0.59	-0.99	0.01	0.39
Mori Fructus	MOL000675	oleic acid	282.52	6.84	1	2	33.13	1.17	0.78	0.14	0.2	4.99
Mori Fructus	MOL000676	DBP	278.38	4.2	0	4	64.54	0.8	0.56	0.13	0.34	5.41
Mori Fructus	MOL000704	styrene	104.16	2.38	0	0	29.55	1.85	2	0.01	0.5
Mori Fructus	MOL000737	morin	302.25	1.5	5	7	46.23	0	-0.77	0.27	0.41	15.51
Mori Fructus	MOL000777	(2S)-2-methylbutan-1-ol	88.17	1.29	1	1	81.23	1.06	1.33	0	0.21	11.19
Mori Fructus	MOL000860	stearic acid	284.54	7.28	1	2	17.83	1.15	1.22	0.14	0.19
Mori Fructus	MOL000864	MYS	212.47	7.22	0	0	13.98	1.81	1.92	0.05	0.15
Mori Fructus	MOL000867	Heptadekan	240.53	8.13	0	0	8.64	1.84	1.87	0.07	0.14
Mori Fructus	MOL000868	LFA	282.62	9.5	0	0	8.46	1.83	1.8	0.13	0.13
Mori Fructus	MOL000869	Henicosane	296.65	9.95	0	0	8.41	1.84	1.8	0.15	0.13
Mori Fructus	MOL000885	Dodekan	170.38	5.85	0	0	17.74	1.79	1.96	0.02	0.16
Mori Fructus	MOL000886	tetradecane	198.44	6.76	0	0	15.94	1.79	1.78	0.04	0.15
Mori Fructus	MOL001099	p-xylene	106.18	2.8	0	0	48.74	1.83	2.06	0.01	0.39	11.71
Mori Fructus	MOL001109	β-thujene	136.26	2.68	0	0	46.44	1.82	2.19	0.04	0.29	11.53
Mori Fructus	MOL001229	cis-resveratrol	228.26	3.01	3	3	41.13	0.75	0.12	0.11	0.43	6.31
Mori Fructus	MOL001335	WLN: Q1R	108.15	1.23	1	1	58.68	1.08	1.27	0.01	0.38	11.87
Mori Fructus	MOL001393	myristic acid	228.42	5.46	1	2	21.18	1.07	0.99	0.07	0.19
Mori Fructus	MOL001402	Octacosane	394.86	13.15	0	0	8.15	1.91	1.46	0.37	0.12
Mori Fructus	MOL001456	citric acid	192.14	-1.39	4	7	56.22	-1.11	-1.38	0.05	0.43	11.46
Mori Fructus	MOL001468	MLT	134.1	-0.95	3	5	59.62	-0.87	-1.4	0.02	0.41	11.4
Mori Fructus	MOL001619	UPL	268.59	9.04	0	0	8.52	1.83	1.7	0.11	0.16
Mori Fructus	MOL001640	NON	172.3	3.63	1	2	26.74	0.96	1.06	0.03	0.22
Mori Fructus	MOL001732	IFP	92.11	-1.41	3	3	72.87	-0.97	-2.63	0.01	0.2	11.45
Mori Fructus	MOL001859	FMT	46.03	-0.28	1	2	33.26	0.21	0.53	0	0.39	12.68
Mori Fructus	MOL001880	OXL	90.04	-0.48	2	4	29.68	-0.64	-0.87	0.01	0.52
Mori Fructus	MOL001886	Tar	150.1	-1.5	4	6	66.38	-1.95	-4.59	0.02	0.44	11.68
Mori Fructus	MOL001893	BU3	90.14	-0.14	2	2	34.87	0.19	-0.01	0.01	0.28	11.25
Mori Fructus	MOL002008	myricetin	318.25	1.24	6	8	13.75	-0.15	-1.01	0.31	0.4
Mori Fructus	MOL002031	toluene	92.15	2.32	0	0	42.58	1.86	2.12	0.01	0.42	11.95
Mori Fructus	MOL002229	HEPTACOSANE	380.83	12.69	0	0	8.18	1.88	1.8	0.36	0.18
Mori Fructus	MOL002372	(6Z,10E,14E,18E)-2,6,10,15,19,23-hexamethyltetracosa-2,6,10,14,18,22-hexaene	410.8	11.33	0	0	33.55	2.07	1.77	0.42	0.27	3.15
Mori Fructus	MOL002376	PENTACOSANE	352.77	11.78	0	0	8.25	1.9	1.85	0.27	0.14
Mori Fructus	MOL002647	Vanillyl alcohol	154.18	0.94	2	3	14.98	0.55	0.24	0.03	0.25
Mori Fructus	MOL002650	Coniferol	180.22	1.41	2	3	44.88	0.55	0.02	0.05	0.32	2.71
Mori Fructus	MOL002678	EB	106.18	2.77	0	0	49.38	1.83	2.15	0.01	0.38	11.76
Mori Fructus	MOL002773	beta-carotene	536.96	12	0	0	37.18	2.25	1.52	0.58	0.33	4.36
Mori Fructus	MOL002850	butylated hydroxytoluene	220.39	4.85	1	1	40.02	1.75	1.8	0.07	0.3	10.36
Mori Fructus	MOL003050	nonanoic acid	158.27	3.17	1	2	40.51	0.92	1.08	0.02	0.23	4.15
Mori Fructus	MOL003493	naphthalene	128.18	2.74	0	0	27.55	1.87	1.92	0.03	0.49
Mori Fructus	MOL003505	Panosorb	112.14	1.34	1	2	30.82	0.8	0.95	0.01	0.39	11.5
Mori Fructus	MOL003802	(2R)-2-ethylhexan-1-ol	130.26	2.66	1	1	26.12	1.22	1.46	0.01	0.17
Mori Fructus	MOL003877	Fuseloel	88.17	1.22	1	1	65.67	1	1.17	0	0.22	11.15
Mori Fructus	MOL004480	acetic acid	60.06	-0.23	1	2	47.87	0.42	0.72	0	0.29	12.21
Mori Fructus	MOL004729	NOJ	163.2	-2.44	5	5	44.04	-1.2	-3.33	0.03	0.18	11.12
Mori Fructus	MOL005151	[(3S)-3,7-dimethylocta-1,6-dien-3-yl] acetate	196.32	3.12	0	2	36.84	1.4	1.51	0.04	0.27	5.5
Mori Fructus	MOL005224	TETRATETRACONTANE	619.34	20.44	0	0	7.82	2.04	1.22	0.25	0.16
Mori Fructus	MOL005472	1,2-Benzenedicarboxylicacid, mono(2-ethyl) hexylester	278.38	4.31	1	4	55.17	0.57	0.35	0.13	0.35	4.94
Mori Fructus	MOL006209	cyanin	411.66	7.08	0	1	47.42	1.78	0.99	0.76	0.28	2.72
Mori Fructus	MOL007349	phosphatidylinositol	867.29	11.26	6	13	8.96	-1.36	-2.68	0.21	0.2
Mori Fructus	MOL008290	lecithin	678.06	8.77	0	8	0.31	0.16	-1.1	0.4	0.02
Mori Fructus	MOL008679	Isohexanol	102.2	1.68	1	1	53.21	1.07	1.26	0.01	0.22	11.04
Mori Fructus	MOL010175	Tannin	1701.27	8.18	25	46	7.89	-6.1	-7.29	0.03	0.49
Mori Fructus	MOL010284	(2S,3R,4S,5R)-hexane-2,3,4,5-tetrol	150.2	-1.16	4	4	46.38	-0.8	-2.6	0.02	0.28	11.31
Mori Fructus	MOL010285	1-Ethyl-2-propylcyclohexane	154.33	4.61	0	0	42.92	1.8	2.12	0.03	0.2	3.55
Mori Fructus	MOL010286	IEA	161.22	1.84	2	1	39.79	1.02	0.74	0.05	0.2	-1.16
Mori Fructus	MOL010287	WLN: T6NJ BG CQ	129.55	1.29	1	2	67.57	1.04	1.05	0.02	0.51	12.17
Mori Fructus	MOL010288	3,5-Dimethylcyclopentene	96.19	2.34	0	0	44.22	1.81	2.26	0.01	0.27	11.3
Mori Fructus	MOL010289	3-Allylbenzothiazoliumbromide	176.28	2.63	0	0	95.31	1.71	1.69	0.05	0.2	6.86
Mori Fructus	MOL010290	3-Aminoacrylonitrile	68.09	-0.77	2	2	47.16	0.98	0.85	0	0.35	12.32
Mori Fructus	MOL010291	3-benzofuranylmethanol	148.17	1.53	1	2	29.46	0.96	0.79	0.04	0.25
Mori Fructus	MOL010292	3-Hydroxybenzylhydrazine	138.19	0.4	4	3	41.44	0.29	-0.18	0.02	0.34	4.45
Mori Fructus	MOL010293	Methionol	106.21	0.32	1	1	67.29	0.83	0.87	0	0.31	11.47
Mori Fructus	MOL010294	4-(3-hydroxypropyl)phenol	152.21	1.74	2	2	23.95	0.7	0.39	0.03	0.32
Mori Fructus	MOL010295	q-Lure	206.26	1.68	0	3	17.01	0.64	0.22	0.06	0.38
Mori Fructus	MOL010296	4-(2,6,6-Trimethyl-1-cyclohexenl-yl)-3-buten-2-ol	222.36	2.82	1	2	20.67	0.77	0.42	0.08	0.29
Mori Fructus	MOL010297	4-Ethyloctane	142.32	4.73	0	0	16.04	1.8	2.11	0.01	0.21
Mori Fructus	MOL010298	(2R)-4-methoxy-2,5-dimethylfuran-3-one	142.17	-0.07	0	3	51.16	0.95	0.95	0.03	0.29	11.44
Mori Fructus	MOL010299	Metacyl	126.13	-0.5	2	4	72.48	0.19	-0.05	0.02	0.36	11.64
Mori Fructus	MOL010300	dIDP	446.74	9.26	0	4	41.08	0.91	0.26	0.57	0.28	1.96
Mori Fructus	MOL010301	PTY	734.18	12.68	3	9	19.42	-0.11	-1.71	0.3	0.18
Mori Fructus	MOL010302	1',3'-Bis(1,2-diacyl-sn-glycero-3-phospho)-sn-glycerol	1466.33	27.24	3	17	12.9	-1.1	-3.37	0.03	0.18
Mori Fructus	MOL010303	(2E,4E)-5-chloro-4-methylhepta-2,4-diene	144.66	3.36	0	0	47.96	1.87	2.09	0.01	0.4	11.38
Mori Fructus	MOL010304	Hydroxymethyl 2-hydroxy-2-methylpropionate	148.18	-0.39	2	4	23.03	-0.4	-1.52	0.02	0.32
Mori Fructus	MOL010305	2-ethoxy-6-(methoxymethyl)phenol	182.24	1.7	1	3	31.23	1.06	0.83	0.04	0.23	2.39
Mori Fructus	MOL010306	Butyl acrylate	128.19	2.05	0	2	57.32	1.14	1.36	0.01	0.29	5.92
Mori Fructus	MOL010307	Methylmethoxyamine	61.1	-0.37	1	2	22.03	0.8	0.55	0	0.07
Mori Fructus	MOL010308	p-Menthane, trans	140.3	3.95	0	0	40.3	1.78	2.11	0.02	0.2	10.43
Mori Fructus	MOL001788	adenine	135.15	-0.58	3	4	62.81	-0.3	-0.63	0.03	0	13.33
Mori Fructus	MOL001320	Amygdalin	457.48	-2.3	7	12	4.42	-1.91	-2.4	0.61	0.33
Mori Fructus	MOL000414	Caffeate	180.17	1.37	3	4	54.97	0.27	0.11	0.05	0	1.63
Mori Fructus	MOL008320	Ecdysteron	480.71	1	6	7	6.94	-1.38	-1.93	0.82	0.26
Mori Fructus	MOL000053	Methose	180.18	-2.69	5	6	1.68	-1.8	-4.58	0.03	0
Mori Fructus	MOL010203	galactose	489.54	-1.93	0	13	10.22	-0.91	-1.28	0.55	0.26
Mori Fructus	MOL000513	3,4,5-trihydroxybenzoic acid	170.13	0.63	4	5	31.69	-0.09	-0.54	0.04	0.41	11.78
Mori Fructus	MOL007296	glucose,d-glucose	424.78	7.26	0	1	16.72	1.48	1.35	0.77	0.24
Mori Fructus	MOL000437	Hirsutrin	464.41	-0.59	8	12	1.86	-1.66	-2.31	0.77	0
Mori Fructus	MOL000422	kaempferol	286.25	1.77	4	6	41.88	0.26	-0.55	0.24	0	14.74
Mori Fructus	MOL000738	kuwanon c	422.51	5.74	4	6	1.22	0.46	-0.44	0.58	0.34
Mori Fructus	MOL000040	Scopoletol	192.18	1.62	1	4	27.77	0.71	0.3	0.08	0
Mori Fructus	MOL003870	gynesine	137.15	-0.29	0	2	60.07	0.58	0.78	0.03	0.1	11.78
Mori Fructus	MOL006077	Thiamine	265.4	-0.05	3	4	19.87	-0.32	-1.14	0.11	0.15
Mori Fructus	MOL002730	Vitamin-G	376.41	0.23	5	10	6.79	-1.22	-1.77	0.5	0.32
Mori Fructus	MOL001691	vitamin c	176.14	-1.76	4	6	13.34	-0.86	-1.38	0.04	0.37
Mori Fructus	MOL000358	beta-sitosterol	414.79	8.08	1	1	36.91	1.32	0.99	0.75	0.23	5.36

## Sheet: Table S2
Table S2. Bioactive components of each herb in CSMFCH
Herb_name	Mol ID	Molecule Name	MW	AlogP	Hdon	Hacc	OB (%)	Caco-2	BBB	DL	FASA-	HL	PubChem_Cid	CanoniCal SMILES
Cuscutae Semen	MOL000098	quercetin	302.25	1.5	5	7	46.43	0.05	-0.77	0.28	0.38	14.4	5280343	C1=CC(=C(C=C1C2=C(C(=O)C3=C(C=C(C=C3O2)O)O)O)O)O
Cuscutae Semen	MOL000422	kaempferol	286.25	1.77	4	6	41.88	0.26	-0.55	0.24	0	14.74	5280863	C1=CC(=CC=C1C2=C(C(=O)C3=C(C=C(C=C3O2)O)O)O)O
Cuscutae Semen	MOL000358	beta-sitosterol	414.79	8.08	1	1	36.91	1.32	0.99	0.75	0.23	5.36	222284	CCC(CCC(C)C1CCC2C1(CCC3C2CC=C4C3(CCC(C4)O)C)C)C(C)C
Cuscutae Semen	MOL000184	NSC63551	412.77	7.56	0	1	39.25	1.42	1.22	0.76	0.22	5.78	5356634	CCC(C=CC(C)C1CCC2C1(CCC3C2CCC4C3(CCC(=O)C4)C)C)C(C)C
Cuscutae Semen	MOL000354	isorhamnetin	316.28	1.76	4	7	49.6	0.31	-0.54	0.31	0.32	14.34	5281654	COC1=C(C=CC(=C1)C2=C(C(=O)C3=C(C=C(C=C3O2)O)O)O)O
Cuscutae Semen	MOL000953	CLR	386.73	7.38	1	1	37.87	1.43	1.13	0.68	0.2	4.52	5997	CC(C)CCCC(C)C1CCC2C1(CCC3C2CC=C4C3(CCC(C4)O)C)C
Cuscutae Semen	MOL001558	sesamin	354.38	2.24	0	6	56.55	0.75	-0.08	0.83	0.31	13.44	72307	C1C2C(COC2C3=CC4=C(C=C3)OCO4)C(O1)C5=CC6=C(C=C5)OCO6
Cuscutae Semen	MOL005043	campest-5-en-3beta-ol	400.76	7.63	1	1	37.58	1.32	0.94	0.71	0.23	4.43	173183	CC(C)C(C)CCC(C)C1CCC2C1(CCC3C2CC=C4C3(CCC(C4)O)C)C
Cuscutae Semen	MOL005440	Isofucosterol	412.77	7.83	1	1	43.78	1.36	0.97	0.76	0.24	5.18	5281326	CC=C(CCC(C)C1CCC2C1(CCC3C2CC=C4C3(CCC(C4)O)C)C)C(C)C
Cuscutae Semen	MOL005944	matrine	248.41	1.42	0	3	63.77	1.39	1.52	0.25	0	6.69		C12C3C4N(C(CCC4)=O)CC1CCCN2CCC3
Cuscutae Semen	MOL006649	sophranol	264.41	0.67	1	4	55.42	0.6	0.68	0.28	0.19	4.94		OC23C1N(CCC3)CCCC1C4N(C(CCC4)=O)C2
Cuscutae Semen	MOL009303	Cuscutoside B	664.67	-1.17	6	16	47.56	-1.62	-2.59	0.18	0.24	21.82		O(c4cc3c(OCO3)cc4C5OCC6C5COC6c8cc7c(OCO7)cc8)C1C(C(C(C(COC2C(C(C(CO2)O)O)O)O1)O)O)O
Cuscutae Semen	MOL005438	campesterol	400.76	7.63	1	1	37.58	1.34	0.95	0.71	0.22	4.83		OC4CC3=CCC2C1C(CCC2C3(C)CC4)(C)C(C(C)CCC(C)C(C)C)CC1
Mori Fructus	MOL000098	quercetin	302.25	1.5	5	7	46.43	0.05	-0.77	0.28	0.38	14.4	5280343	C1=CC(=C(C=C1C2=C(C(=O)C3=C(C=C(C=C3O2)O)O)O)O)O
Mori Fructus	MOL000422	kaempferol	286.25	1.77	4	6	41.88	0.26	-0.55	0.24	0	14.74	5280863	C1=CC(=CC=C1C2=C(C(=O)C3=C(C=C(C=C3O2)O)O)O)O
Mori Fructus	MOL000358	beta-sitosterol	414.79	8.08	1	1	36.91	1.32	0.99	0.75	0.23	5.36	222284	CCC(CCC(C)C1CCC2C1(CCC3C2CC=C4C3(CCC(C4)O)C)C)C(C)C
Mori Fructus	MOL000737	morin	302.25	1.5	5	7	46.23	0	-0.77	0.27	0.41	15.51	5281670	C1=CC(=C(C=C1O)O)C2=C(C(=O)C3=C(C=C(C=C3O2)O)O)O
Mori Fructus	MOL002372	(6Z,10E,14E,18E)-2,6,10,15,19,23-hexamethyltetracosa-2,6,10,14,18,22-hexaene	410.8	11.33	0	0	33.55	2.07	1.77	0.42	0.27	3.15	11975273	CC(=CCCC(=CCCC(=CCCC=C(C)CCC=C(C)CCC=C(C)C)C)C)C
Mori Fructus	MOL002773	beta-carotene	536.96	12	0	0	37.18	2.25	1.52	0.58	0.33	4.36	5280489	CC1=C(C(CCC1)(C)C)C=CC(=CC=CC(=CC=CC=C(C)C=CC=C(C)C=CC2=C(CCCC2(C)C)C)C)C
Mori Fructus	MOL010300	dIDP	446.74	9.26	0	4	41.08	0.91	0.26	0.57	0.28	1.96	33599	CC(C)CCCCCCCOC(=O)C1=CC=CC=C1C(=O)OCCCCCCCC(C)C
Mori Fructus	MOL006209	cyanin	411.66	7.08	0	1	47.42	1.78	0.99	0.76	0.28	2.72		c12c(N(CCC(C)C)C=CC1=Cc3c4c(cccc4)n(CCC(C)C)cc3)cccc2

## Sheet: Table S3
Table S3. Potential targets of bioactive components in CSMFCH
Uniprot ID	Entry name	Protein names	Gene name	Gene ID
Q9NPH5	NOX4_HUMAN	NADPH oxidase 4 (EC 1.6.3.-) (Kidney oxidase-1) (KOX-1) (Kidney superoxide-producing NADPH oxidase) (Renal NAD(P)H-oxidase)	NOX4	50507
P30518	V2R_HUMAN	Vasopressin V2 receptor (V2R) (AVPR V2) (Antidiuretic hormone receptor) (Renal-type arginine vasopressin receptor)	AVPR2	554
P15121	ALDR_HUMAN	Aldo-keto reductase family 1 member B1 (EC 1.1.1.300) (EC 1.1.1.372) (EC 1.1.1.54) (Aldehyde reductase) (Aldose reductase) (AR) (EC 1.1.1.21)	AKR1B1	231
P47989	XDH_HUMAN	Xanthine dehydrogenase/oxidase [Includes: Xanthine dehydrogenase (XD) (EC 1.17.1.4); Xanthine oxidase (XO) (EC 1.17.3.2) (Xanthine oxidoreductase) (XOR)]	XDH	7498
P21397	AOFA_HUMAN	Amine oxidase [flavin-containing] A (EC 1.4.3.4) (Monoamine oxidase type A) (MAO-A)	MAOA	4128
P08069	IGF1R_HUMAN	Insulin-like growth factor 1 receptor (EC 2.7.10.1) (Insulin-like growth factor I receptor) (IGF-I receptor) (CD antigen CD221) [Cleaved into: Insulin-like growth factor 1 receptor alpha chain; Insulin-like growth factor 1 receptor beta chain]	IGF1R	3480
P36888	FLT3_HUMAN	Receptor-type tyrosine-protein kinase FLT3 (EC 2.7.10.1) (FL cytokine receptor) (Fetal liver kinase-2) (FLK-2) (Fms-like tyrosine kinase 3) (FLT-3) (Stem cell tyrosine kinase 1) (STK-1) (CD antigen CD135)	FLT3	2322
P11511	CP19A_HUMAN	Aromatase (EC 1.14.14.14) (CYPXIX) (Cytochrome P-450AROM) (Cytochrome P450 19A1) (Estrogen synthase)	CYP19A1	1588
P00533	EGFR_HUMAN	Epidermal growth factor receptor (EC 2.7.10.1) (Proto-oncogene c-ErbB-1) (Receptor tyrosine-protein kinase erbB-1)	EGFR	1956
P00734	THRB_HUMAN	Prothrombin (EC 3.4.21.5) (Coagulation factor II) [Cleaved into: Activation peptide fragment 1; Activation peptide fragment 2; Thrombin light chain; Thrombin heavy chain]	F2	2147
P00918	CAH2_HUMAN	Carbonic anhydrase 2 (EC 4.2.1.1) (Carbonate dehydratase II) (Carbonic anhydrase C) (CAC) (Carbonic anhydrase II) (CA-II)	CA2	760
P11309	PIM1_HUMAN	Serine/threonine-protein kinase pim-1 (EC 2.7.11.1)	PIM1	5292
P09917	LOX5_HUMAN	Polyunsaturated fatty acid 5-lipoxygenase (EC 1.13.11.-) (Arachidonate 5-lipoxygenase) (5-LO) (5-lipoxygenase) (EC 1.13.11.34)	ALOX5	240
Q96GD4	AURKB_HUMAN	Aurora kinase B (EC 2.7.11.1) (Aurora 1) (Aurora- and IPL1-like midbody-associated protein 1) (AIM-1) (Aurora/IPL1-related kinase 2) (ARK-2) (Aurora-related kinase 2) (STK-1) (Serine/threonine-protein kinase 12) (Serine/threonine-protein kinase 5) (Serine/threonine-protein kinase aurora-B)	AURKB	9212
P21917	DRD4_HUMAN	D(4) dopamine receptor (D(2C) dopamine receptor) (Dopamine D4 receptor)	DRD4	1815
P30542	AA1R_HUMAN	Adenosine receptor A1	ADORA1	134
P43166	CAH7_HUMAN	Carbonic anhydrase 7 (EC 4.2.1.1) (Carbonate dehydratase VII) (Carbonic anhydrase VII) (CA-VII)	CA7	766
Q04760	LGUL_HUMAN	Lactoylglutathione lyase (EC 4.4.1.5) (Aldoketomutase) (Glyoxalase I) (Glx I) (Ketone-aldehyde mutase) (Methylglyoxalase) (S-D-lactoylglutathione methylglyoxal lyase)	GLO1	2739
P05164	PERM_HUMAN	Myeloperoxidase (MPO) (EC 1.11.2.2) [Cleaved into: Myeloperoxidase; 89 kDa myeloperoxidase; 84 kDa myeloperoxidase; Myeloperoxidase light chain; Myeloperoxidase heavy chain]	MPO	4353
P27986	P85A_HUMAN	Phosphatidylinositol 3-kinase regulatory subunit alpha (PI3-kinase regulatory subunit alpha) (PI3K regulatory subunit alpha) (PtdIns-3-kinase regulatory subunit alpha) (Phosphatidylinositol 3-kinase 85 kDa regulatory subunit alpha) (PI3-kinase subunit p85-alpha) (PtdIns-3-kinase regulatory subunit p85-alpha)	PIK3R1	5295
P29274	AA2AR_HUMAN	Adenosine receptor A2a	ADORA2A	135
P53355	DAPK1_HUMAN	Death-associated protein kinase 1 (DAP kinase 1) (EC 2.7.11.1)	DAPK1	1612
P06737	PYGL_HUMAN	Glycogen phosphorylase, liver form (EC 2.4.1.1)	PYGL	5836
P00915	CAH1_HUMAN	Carbonic anhydrase 1 (EC 4.2.1.1) (Carbonate dehydratase I) (Carbonic anhydrase B) (CAB) (Carbonic anhydrase I) (CA-I)	CA1	759
P49841	GSK3B_HUMAN	Glycogen synthase kinase-3 beta (GSK-3 beta) (EC 2.7.11.26) (Serine/threonine-protein kinase GSK3B) (EC 2.7.11.1)	GSK3B	2932
P12931	SRC_HUMAN	Proto-oncogene tyrosine-protein kinase Src (EC 2.7.10.2) (Proto-oncogene c-Src) (pp60c-src) (p60-Src)	SRC	6714
Q05397	FAK1_HUMAN	Focal adhesion kinase 1 (FADK 1) (EC 2.7.10.2) (Focal adhesion kinase-related nonkinase) (FRNK) (Protein phosphatase 1 regulatory subunit 71) (PPP1R71) (Protein-tyrosine kinase 2) (p125FAK) (pp125FAK)	PTK2	5747
P37059	DHB2_HUMAN	Estradiol 17-beta-dehydrogenase 2 (EC 1.1.1.62) (17-beta-hydroxysteroid dehydrogenase type 2) (17-beta-HSD 2) (20 alpha-hydroxysteroid dehydrogenase) (20-alpha-HSD) (E2DH) (Microsomal 17-beta-hydroxysteroid dehydrogenase) (Short chain dehydrogenase/reductase family 9C member 2) (Testosterone 17-beta-dehydrogenase) (EC 1.1.1.239)	HSD17B2	3294
P35968	VGFR2_HUMAN	Vascular endothelial growth factor receptor 2 (VEGFR-2) (EC 2.7.10.1) (Fetal liver kinase 1) (FLK-1) (Kinase insert domain receptor) (KDR) (Protein-tyrosine kinase receptor flk-1) (CD antigen CD309)	KDR	3791
P45452	MMP13_HUMAN	Collagenase 3 (EC 3.4.24.-) (Matrix metalloproteinase-13) (MMP-13)	MMP13	4322
P08254	MMP3_HUMAN	Stromelysin-1 (SL-1) (EC 3.4.24.17) (Matrix metalloproteinase-3) (MMP-3) (Transin-1)	MMP3	4314
P07451	CAH3_HUMAN	Carbonic anhydrase 3 (EC 4.2.1.1) (Carbonate dehydratase III) (Carbonic anhydrase III) (CA-III)	CA3	761
P16050	LOX15_HUMAN	Polyunsaturated fatty acid lipoxygenase ALOX15 (12/15-lipoxygenase) (Arachidonate 12-lipoxygenase, leukocyte-type) (12-LOX) (EC 1.13.11.31) (Arachidonate 15-lipoxygenase) (15-LOX) (15-LOX-1) (EC 1.13.11.33) (Arachidonate omega-6 lipoxygenase) (Hepoxilin A3 synthase Alox15) (EC 1.13.11.-) (Linoleate 13S-lipoxygenase) (EC 1.13.11.12)	ALOX15	246
P33527	MRP1_HUMAN	Multidrug resistance-associated protein 1 (EC 7.6.2.2) (ATP-binding cassette sub-family C member 1) (Glutathione-S-conjugate-translocating ATPase ABCC1) (EC 7.6.2.3) (Leukotriene C(4) transporter) (LTC4 transporter)	ABCC1	4363
P53350	PLK1_HUMAN	Serine/threonine-protein kinase PLK1 (EC 2.7.11.21) (Polo-like kinase 1) (PLK-1) (Serine/threonine-protein kinase 13) (STPK13)	PLK1	5347
P23280	CAH6_HUMAN	Carbonic anhydrase 6 (EC 4.2.1.1) (Carbonate dehydratase VI) (Carbonic anhydrase VI) (CA-VI) (Salivary carbonic anhydrase) (Secreted carbonic anhydrase)	CA6	765
P06493	CDK1_HUMAN	Cyclin-dependent kinase 1 (CDK1) (EC 2.7.11.22) (EC 2.7.11.23) (Cell division control protein 2 homolog) (Cell division protein kinase 1) (p34 protein kinase)	CDK1	983
P14780	MMP9_HUMAN	Matrix metalloproteinase-9 (MMP-9) (EC 3.4.24.35) (92 kDa gelatinase) (92 kDa type IV collagenase) (Gelatinase B) (GELB) [Cleaved into: 67 kDa matrix metalloproteinase-9; 82 kDa matrix metalloproteinase-9]	MMP9	4318
O43570	CAH12_HUMAN	Carbonic anhydrase 12 (EC 4.2.1.1) (Carbonate dehydratase XII) (Carbonic anhydrase XII) (CA-XII) (Tumor antigen HOM-RCC-3.1.3)	CA12	771
P08253	MMP2_HUMAN	72 kDa type IV collagenase (EC 3.4.24.24) (72 kDa gelatinase) (Gelatinase A) (Matrix metalloproteinase-2) (MMP-2) (TBE-1) [Cleaved into: PEX]	MMP2	4313
Q16512	PKN1_HUMAN	Serine/threonine-protein kinase N1 (EC 2.7.11.13) (Protease-activated kinase 1) (PAK-1) (Protein kinase C-like 1) (Protein kinase C-like PKN) (Protein kinase PKN-alpha) (Protein-kinase C-related kinase 1) (Serine-threonine protein kinase N)	PKN1	5585
Q9ULX7	CAH14_HUMAN	Carbonic anhydrase 14 (EC 4.2.1.1) (Carbonate dehydratase XIV) (Carbonic anhydrase XIV) (CA-XIV)	CA14	23632
Q16790	CAH9_HUMAN	Carbonic anhydrase 9 (EC 4.2.1.1) (Carbonate dehydratase IX) (Carbonic anhydrase IX) (CA-IX) (CAIX) (Membrane antigen MN) (P54/58N) (Renal cell carcinoma-associated antigen G250) (RCC-associated antigen G250) (pMW1)	CA9	768
P68400	CSK21_HUMAN	Casein kinase II subunit alpha (CK II alpha) (EC 2.7.11.1)	CSNK2A1	1457
P18054	LOX12_HUMAN	Polyunsaturated fatty acid lipoxygenase ALOX12 (EC 1.13.11.-) (Arachidonate (12S)-lipoxygenase) (12S-LOX) (12S-lipoxygenase) (EC 1.13.11.31) (Arachidonate (15S)-lipoxygenase) (EC 1.13.11.33) (Linoleate (13S)-lipoxygenase) (Lipoxin synthase 12-LO) (EC 3.3.2.-) (Platelet-type lipoxygenase 12)	ALOX12	239
P08581	MET_HUMAN	Hepatocyte growth factor receptor (HGF receptor) (EC 2.7.10.1) (HGF/SF receptor) (Proto-oncogene c-Met) (Scatter factor receptor) (SF receptor) (Tyrosine-protein kinase Met)	MET	4233
P22748	CAH4_HUMAN	Carbonic anhydrase 4 (EC 4.2.1.1) (Carbonate dehydratase IV) (Carbonic anhydrase IV) (CA-IV)	CA4	762
P51955	NEK2_HUMAN	Serine/threonine-protein kinase Nek2 (EC 2.7.11.1) (HSPK 21) (Never in mitosis A-related kinase 2) (NimA-related protein kinase 2) (NimA-like protein kinase 1)	NEK2	4751
P25024	CXCR1_HUMAN	C-X-C chemokine receptor type 1 (CXC-R1) (CXCR-1) (CDw128a) (High affinity interleukin-8 receptor A) (IL-8R A) (IL-8 receptor type 1) (CD antigen CD181)	CXCR1	3577
Q13554	KCC2B_HUMAN	Calcium/calmodulin-dependent protein kinase type II subunit beta (CaM kinase II subunit beta) (CaMK-II subunit beta) (EC 2.7.11.17)	CAMK2B	816
Q9UM73	ALK_HUMAN	ALK tyrosine kinase receptor (EC 2.7.10.1) (Anaplastic lymphoma kinase) (CD antigen CD246)	ALK	238
P31749	AKT1_HUMAN	RAC-alpha serine/threonine-protein kinase (EC 2.7.11.1) (Protein kinase B) (PKB) (Protein kinase B alpha) (PKB alpha) (Proto-oncogene c-Akt) (RAC-PK-alpha)	AKT1	207
P08183	MDR1_HUMAN	ATP-dependent translocase ABCB1 (ATP-binding cassette sub-family B member 1) (Multidrug resistance protein 1) (EC 7.6.2.2) (P-glycoprotein 1) (Phospholipid transporter ABCB1) (EC 7.6.2.1) (CD antigen CD243)	ABCB1	5243
Q9HC98	NEK6_HUMAN	Serine/threonine-protein kinase Nek6 (EC 2.7.11.1) (Never in mitosis A-related kinase 6) (NimA-related protein kinase 6) (Protein kinase SID6-1512)	NEK6	10783
P04054	PA21B_HUMAN	Phospholipase A2 (EC 3.1.1.4) (Group IB phospholipase A2) (Phosphatidylcholine 2-acylhydrolase 1B)	PLA2G1B	5319
P35218	CAH5A_HUMAN	Carbonic anhydrase 5A, mitochondrial (EC 4.2.1.1) (Carbonate dehydratase VA) (Carbonic anhydrase VA) (CA-VA)	CA5A	763
P56817	BACE1_HUMAN	Beta-secretase 1 (EC 3.4.23.46) (Aspartyl protease 2) (ASP2) (Asp 2) (Beta-site amyloid precursor protein cleaving enzyme 1) (Beta-site APP cleaving enzyme 1) (Memapsin-2) (Membrane-associated aspartic protease 2)	BACE1	23621
Q16678	CP1B1_HUMAN	Cytochrome P450 1B1 (EC 1.14.14.1) (CYPIB1) (Hydroperoxy icosatetraenoate dehydratase) (EC 4.2.1.152)	CYP1B1	1545
P30530	UFO_HUMAN	Tyrosine-protein kinase receptor UFO (EC 2.7.10.1) (AXL oncogene)	AXL	558
Q9UNQ0	ABCG2_HUMAN	Broad substrate specificity ATP-binding cassette transporter ABCG2 (EC 7.6.2.2) (ATP-binding cassette sub-family G member 2) (Breast cancer resistance protein) (CDw338) (Mitoxantrone resistance-associated protein) (Placenta-specific ATP-binding cassette transporter) (Urate exporter) (CD antigen CD338)	ABCG2	9429
O60285	NUAK1_HUMAN	NUAK family SNF1-like kinase 1 (EC 2.7.11.1) (AMPK-related protein kinase 5) (ARK5) (Omphalocele kinase 1)	NUAK1	9891
P52895	AK1C2_HUMAN	Aldo-keto reductase family 1 member C2 (EC 1.-.-.-) (3-alpha-HSD3) (Chlordecone reductase homolog HAKRD) (Dihydrodiol dehydrogenase 2) (DD-2) (DD2) (Dihydrodiol dehydrogenase/bile acid-binding protein) (DD/BABP) (Trans-1,2-dihydrobenzene-1,2-diol dehydrogenase) (EC 1.3.1.20) (Type III 3-alpha-hydroxysteroid dehydrogenase) (EC 1.1.1.357)	AKR1C2	1646
Q04828	AK1C1_HUMAN	Aldo-keto reductase family 1 member C1 (EC 1.1.1.-) (20-alpha-hydroxysteroid dehydrogenase) (20-alpha-HSD) (EC 1.1.1.149) (Chlordecone reductase homolog HAKRC) (Dihydrodiol dehydrogenase 1/2) (DD1/DD2) (High-affinity hepatic bile acid-binding protein) (HBAB) (Indanol dehydrogenase) (EC 1.1.1.112) (Trans-1,2-dihydrobenzene-1,2-diol dehydrogenase) (EC 1.3.1.20)	AKR1C1	1645
P42330	AK1C3_HUMAN	Aldo-keto reductase family 1 member C3 (EC 1.-.-.-) (17-beta-hydroxysteroid dehydrogenase type 5) (17-beta-HSD 5) (3-alpha-HSD type II, brain) (3-alpha-hydroxysteroid dehydrogenase type 2) (3-alpha-HSD type 2) (EC 1.1.1.357) (Chlordecone reductase homolog HAKRb) (Dihydrodiol dehydrogenase 3) (DD-3) (DD3) (Dihydrodiol dehydrogenase type I) (HA1753) (Indanol dehydrogenase) (EC 1.1.1.112) (Prostagla…	AKR1C3	8644
P17516	AK1C4_HUMAN	Aldo-keto reductase family 1 member C4 (EC 1.1.1.-) (3-alpha-HSD1) (3-alpha-hydroxysteroid dehydrogenase type I) (EC 1.1.1.357) (Chlordecone reductase) (CDR) (EC 1.1.1.225) (Dihydrodiol dehydrogenase 4) (DD-4) (DD4) (HAKRA)	AKR1C4	1109
Q8N1Q1	CAH13_HUMAN	Carbonic anhydrase 13 (EC 4.2.1.1) (Carbonate dehydratase XIII) (Carbonic anhydrase XIII) (CA-XIII)	CA13	377677
P14550	AK1A1_HUMAN	Aldo-keto reductase family 1 member A1 (EC 1.1.1.2) (EC 1.1.1.372) (EC 1.1.1.54) (Alcohol dehydrogenase [NADP(+)]) (Aldehyde reductase) (Glucuronate reductase) (EC 1.1.1.19) (Glucuronolactone reductase) (EC 1.1.1.20)	AKR1A1	10327
Q9HC97	GPR35_HUMAN	G-protein coupled receptor 35 (Kynurenic acid receptor) (KYNA receptor)	GPR35	2859
P43405	KSYK_HUMAN	Tyrosine-protein kinase SYK (EC 2.7.10.2) (Spleen tyrosine kinase) (p72-Syk)	SYK	6850
P10636	TAU_HUMAN	Microtubule-associated protein tau (Neurofibrillary tangle protein) (Paired helical filament-tau) (PHF-tau)	MAPT	4137
B2RXH2	KDM4E_HUMAN	Lysine-specific demethylase 4E (EC 1.14.11.66) (KDM4D-like protein) (Lysine-specific demethylase 4D-like) ([histone H3]-trimethyl-L-lysine(9) demethylase 4E)	KDM4E	390245
P11388	TOP2A_HUMAN	DNA topoisomerase 2-alpha (EC 5.6.2.2) (DNA topoisomerase II, alpha isozyme)	TOP2A	7153
P06213	INSR_HUMAN	Insulin receptor (IR) (EC 2.7.10.1) (CD antigen CD220) [Cleaved into: Insulin receptor subunit alpha; Insulin receptor subunit beta]	INSR	3643
P22303	ACES_HUMAN	Acetylcholinesterase (AChE) (EC 3.1.1.7)	ACHE	43
Q15746	MYLK_HUMAN	Myosin light chain kinase, smooth muscle (MLCK) (smMLCK) (EC 2.7.11.18) (Kinase-related protein) (KRP) (Telokin) [Cleaved into: Myosin light chain kinase, smooth muscle, deglutamylated form]	MYLK	4638
P48736	PK3CG_HUMAN	Phosphatidylinositol 4,5-bisphosphate 3-kinase catalytic subunit gamma isoform (PI3-kinase subunit gamma) (PI3K-gamma) (PI3Kgamma) (PtdIns-3-kinase subunit gamma) (EC 2.7.1.153) (Phosphatidylinositol 4,5-bisphosphate 3-kinase 110 kDa catalytic subunit gamma) (PtdIns-3-kinase subunit p110-gamma) (p110gamma) (Phosphoinositide-3-kinase catalytic gamma polypeptide) (Serine/threonine protein kinase PI…	PIK3CG	5294
P27695	APEX1_HUMAN	DNA-(apurinic or apyrimidinic site) endonuclease (EC 3.1.-.-) (APEX nuclease) (APEN) (Apurinic-apyrimidinic endonuclease 1) (AP endonuclease 1) (APE-1) (REF-1) (Redox factor-1) [Cleaved into: DNA-(apurinic or apyrimidinic site) endonuclease, mitochondrial]	APEX1	328
Q15078	CD5R1_HUMAN	Cyclin-dependent kinase 5 activator 1 (CDK5 activator 1) (Cyclin-dependent kinase 5 regulatory subunit 1) (TPKII regulatory subunit) [Cleaved into: Cyclin-dependent kinase 5 activator 1, p35 (p35); Cyclin-dependent kinase 5 activator 1, p25 (p25) (Tau protein kinase II 23 kDa subunit) (p23)]	CDK5R1	8851
Q00535	CDK5_HUMAN	Cyclin-dependent-like kinase 5 (EC 2.7.11.1) (Cell division protein kinase 5) (Serine/threonine-protein kinase PSSALRE) (Tau protein kinase II catalytic subunit) (TPKII catalytic subunit)	CDK5	1020
Q8WWL7	CCNB3_HUMAN	G2/mitotic-specific cyclin-B3	CCNB3	85417
P14635	CCNB1_HUMAN	G2/mitotic-specific cyclin-B1	CCNB1	891
O95067	CCNB2_HUMAN	G2/mitotic-specific cyclin-B2	CCNB2	9133
P05089	ARGI1_HUMAN	Arginase-1 (EC 3.5.3.1) (Liver-type arginase) (Type I arginase)	ARG1	383
Q13332	PTPRS_HUMAN	Receptor-type tyrosine-protein phosphatase S (R-PTP-S) (EC 3.1.3.48) (Receptor-type tyrosine-protein phosphatase sigma) (R-PTP-sigma)	PTPRS	5802
Q92731	ESR2_HUMAN	Estrogen receptor beta (ER-beta) (Nuclear receptor subfamily 3 group A member 2)	ESR2	2100
P29372	3MG_HUMAN	DNA-3-methyladenine glycosylase (EC 3.2.2.21) (3-alkyladenine DNA glycosylase) (3-methyladenine DNA glycosidase) (ADPG) (N-methylpurine-DNA glycosylase)	MPG	4350
Q96S37	S22AC_HUMAN	Solute carrier family 22 member 12 (Organic anion transporter 4-like protein) (Renal-specific transporter) (RST) (Urate anion exchanger 1)	SLC22A12	116085
Q00534	CDK6_HUMAN	Cyclin-dependent kinase 6 (EC 2.7.11.22) (Cell division protein kinase 6) (Serine/threonine-protein kinase PLSTIRE)	CDK6	1021
P24941	CDK2_HUMAN	Cyclin-dependent kinase 2 (EC 2.7.11.22) (Cell division protein kinase 2) (p33 protein kinase)	CDK2	1017
P14679	TYRO_HUMAN	Tyrosinase (EC 1.14.18.1) (LB24-AB) (Monophenol monooxygenase) (SK29-AB) (Tumor rejection antigen AB)	TYR	7299
P14061	DHB1_HUMAN	Estradiol 17-beta-dehydrogenase 1 (EC 1.1.1.62) (17-beta-hydroxysteroid dehydrogenase type 1) (17-beta-HSD 1) (20 alpha-hydroxysteroid dehydrogenase) (20-alpha-HSD) (E2DH) (Placental 17-beta-hydroxysteroid dehydrogenase) (Short chain dehydrogenase/reductase family 28C member 1)	HSD17B1	3292
P35869	AHR_HUMAN	Aryl hydrocarbon receptor (Ah receptor) (AhR) (Class E basic helix-loop-helix protein 76) (bHLHe76)	AHR	196
P11474	ERR1_HUMAN	Steroid hormone receptor ERR1 (Estrogen receptor-like 1) (Estrogen-related receptor alpha) (ERR-alpha) (Nuclear receptor subfamily 3 group B member 1)	ESRRA	2101
P05067	A4_HUMAN	Amyloid-beta precursor protein (APP) (ABPP) (APPI) (Alzheimer disease amyloid protein) (Amyloid precursor protein) (Amyloid-beta A4 protein) (Cerebral vascular amyloid peptide) (CVAP) (PreA4) (Protease nexin-II) (PN-II) [Cleaved into: N-APP; Soluble APP-alpha (S-APP-alpha); Soluble APP-beta (S-APP-beta); C99 (Beta-secretase C-terminal fragment) (Beta-CTF); Amyloid-beta protein 42 (Abeta42) (Beta-…	APP	351
P09874	PARP1_HUMAN	Poly [ADP-ribose] polymerase 1 (PARP-1) (EC 2.4.2.30) (ADP-ribosyltransferase diphtheria toxin-like 1) (ARTD1) (DNA ADP-ribosyltransferase PARP1) (EC 2.4.2.-) (NAD(+) ADP-ribosyltransferase 1) (ADPRT 1) (Poly[ADP-ribose] synthase 1) (Protein poly-ADP-ribosyltransferase PARP1) (EC 2.4.2.-)	PARP1	142
P02766	TTHY_HUMAN	Transthyretin (ATTR) (Prealbumin) (TBPA)	TTR	7276
P39900	MMP12_HUMAN	Macrophage metalloelastase (MME) (EC 3.4.24.65) (Macrophage elastase) (ME) (hME) (Matrix metalloproteinase-12) (MMP-12)	MMP12	4321
P28907	CD38_HUMAN	ADP-ribosyl cyclase/cyclic ADP-ribose hydrolase 1 (EC 3.2.2.6) (2'-phospho-ADP-ribosyl cyclase) (2'-phospho-ADP-ribosyl cyclase/2'-phospho-cyclic-ADP-ribose transferase) (EC 2.4.99.20) (2'-phospho-cyclic-ADP-ribose transferase) (ADP-ribosyl cyclase 1) (ADPRC 1) (Cyclic ADP-ribose hydrolase 1) (cADPr hydrolase 1) (T10) (CD antigen CD38)	CD38	952
O60218	AK1BA_HUMAN	Aldo-keto reductase family 1 member B10 (EC 1.1.1.300) (EC 1.1.1.54) (ARL-1) (Aldose reductase-like) (Aldose reductase-related protein) (ARP) (hARP) (Small intestine reductase) (SI reductase)	AKR1B10	57016
Q9H2K2	TNKS2_HUMAN	Poly [ADP-ribose] polymerase tankyrase-2 (EC 2.4.2.30) (ADP-ribosyltransferase diphtheria toxin-like 6) (ARTD6) (Poly [ADP-ribose] polymerase 5B) (Protein poly-ADP-ribosyltransferase tankyrase-2) (EC 2.4.2.-) (TNKS-2) (TRF1-interacting ankyrin-related ADP-ribose polymerase 2) (Tankyrase II) (Tankyrase-2) (TANK2) (Tankyrase-like protein) (Tankyrase-related protein)	TNKS2	80351
O95271	TNKS1_HUMAN	Poly [ADP-ribose] polymerase tankyrase-1 (EC 2.4.2.30) (ADP-ribosyltransferase diphtheria toxin-like 5) (ARTD5) (Poly [ADP-ribose] polymerase 5A) (Protein poly-ADP-ribosyltransferase tankyrase-1) (EC 2.4.2.-) (TNKS-1) (TRF1-interacting ankyrin-related ADP-ribose polymerase) (Tankyrase I) (Tankyrase-1) (TANK1)	TNKS	8658
P11387	TOP1_HUMAN	DNA topoisomerase 1 (EC 5.6.2.1) (DNA topoisomerase I)	TOP1	7150
O14746	TERT_HUMAN	Telomerase reverse transcriptase (EC 2.7.7.49) (HEST2) (Telomerase catalytic subunit) (Telomerase-associated protein 2) (TP2)	TERT	7015
P07339	CATD_HUMAN	Cathepsin D (EC 3.4.23.5) [Cleaved into: Cathepsin D light chain; Cathepsin D heavy chain]	CTSD	1509
O00519	FAAH1_HUMAN	Fatty-acid amide hydrolase 1 (EC 3.5.1.99) (Anandamide amidohydrolase 1) (Fatty acid ester hydrolase) (EC 3.1.1.-) (Oleamide hydrolase 1)	FAAH	2166
Q8NER1	TRPV1_HUMAN	Transient receptor potential cation channel subfamily V member 1 (TrpV1) (Capsaicin receptor) (Osm-9-like TRP channel 1) (OTRPC1) (Vanilloid receptor 1)	TRPV1	7442
P18405	S5A1_HUMAN	3-oxo-5-alpha-steroid 4-dehydrogenase 1 (EC 1.3.1.22) (SR type 1) (Steroid 5-alpha-reductase 1) (S5AR 1)	SRD5A1	6715
P31213	S5A2_HUMAN	3-oxo-5-alpha-steroid 4-dehydrogenase 2 (EC 1.3.1.22) (5 alpha-SR2) (SR type 2) (Steroid 5-alpha-reductase 2) (S5AR 2) (Type II 5-alpha reductase)	SRD5A2	6716
P23219	PGH1_HUMAN	Prostaglandin G/H synthase 1 (EC 1.14.99.1) (Cyclooxygenase-1) (COX-1) (Prostaglandin H2 synthase 1) (PGH synthase 1) (PGHS-1) (PHS 1) (Prostaglandin-endoperoxide synthase 1)	PTGS1	5742
P04278	SHBG_HUMAN	Sex hormone-binding globulin (SHBG) (Sex steroid-binding protein) (SBP) (Testis-specific androgen-binding protein) (ABP) (Testosterone-estradiol-binding globulin) (TeBG) (Testosterone-estrogen-binding globulin)	SHBG	6462
P07148	FABPL_HUMAN	Fatty acid-binding protein, liver (Fatty acid-binding protein 1) (Liver-type fatty acid-binding protein) (L-FABP)	FABP1	2168
P04150	GCR_HUMAN	Glucocorticoid receptor (GR) (Nuclear receptor subfamily 3 group C member 1)	NR3C1	2908
P05093	CP17A_HUMAN	Steroid 17-alpha-hydroxylase/17,20 lyase (EC 1.14.14.19) (17-alpha-hydroxyprogesterone aldolase) (EC 1.14.14.32) (CYPXVII) (Cytochrome P450 17A1) (Cytochrome P450-C17) (Cytochrome P450c17) (Steroid 17-alpha-monooxygenase)	CYP17A1	1586
P06401	PRGR_HUMAN	Progesterone receptor (PR) (Nuclear receptor subfamily 3 group C member 3)	PGR	5241
P10275	ANDR_HUMAN	Androgen receptor (Dihydrotestosterone receptor) (Nuclear receptor subfamily 3 group C member 4)	AR	367
P18031	PTN1_HUMAN	Tyrosine-protein phosphatase non-receptor type 1 (EC 3.1.3.48) (Protein-tyrosine phosphatase 1B) (PTP-1B)	PTPN1	5770
P51681	CCR5_HUMAN	C-C chemokine receptor type 5 (C-C CKR-5) (CC-CKR-5) (CCR-5) (CCR5) (CHEMR13) (HIV-1 fusion coreceptor) (CD antigen CD195)	CCR5	1234
O75469	NR1I2_HUMAN	Nuclear receptor subfamily 1 group I member 2 (Orphan nuclear receptor PAR1) (Orphan nuclear receptor PXR) (Pregnane X receptor) (Steroid and xenobiotic receptor) (SXR)	NR1I2	8856
Q14994	NR1I3_HUMAN	Nuclear receptor subfamily 1 group I member 3 (Constitutive activator of retinoid response) (Constitutive active response) (Constitutive androstane receptor) (CAR) (Orphan nuclear receptor MB67)	NR1I3	9970
P08235	MCR_HUMAN	Mineralocorticoid receptor (MR) (Nuclear receptor subfamily 3 group C member 2)	NR3C2	4306
P37058	DHB3_HUMAN	Testosterone 17-beta-dehydrogenase 3 (EC 1.1.1.64) (17-beta-hydroxysteroid dehydrogenase type 3) (17-beta-HSD 3) (Short chain dehydrogenase/reductase family 12C member 2) (Testicular 17-beta-hydroxysteroid dehydrogenase)	HSD17B3	3293
P29350	PTN6_HUMAN	Tyrosine-protein phosphatase non-receptor type 6 (EC 3.1.3.48) (Hematopoietic cell protein-tyrosine phosphatase) (Protein-tyrosine phosphatase 1C) (PTP-1C) (Protein-tyrosine phosphatase SHP-1) (SH-PTP1)	PTPN6	5777
P17706	PTN2_HUMAN	Tyrosine-protein phosphatase non-receptor type 2 (EC 3.1.3.48) (T-cell protein-tyrosine phosphatase) (TCPTP)	PTPN2	5771
P21554	CNR1_HUMAN	Cannabinoid receptor 1 (CB-R) (CB1) (CANN6)	CNR1	1268
P15090	FABP4_HUMAN	Fatty acid-binding protein, adipocyte (Adipocyte lipid-binding protein) (ALBP) (Adipocyte-type fatty acid-binding protein) (A-FABP) (AFABP) (Fatty acid-binding protein 4)	FABP4	2167
P05413	FABPH_HUMAN	Fatty acid-binding protein, heart (Fatty acid-binding protein 3) (Heart-type fatty acid-binding protein) (H-FABP) (Mammary-derived growth inhibitor) (MDGI) (Muscle fatty acid-binding protein) (M-FABP)	FABP3	2170
Q01469	FABP5_HUMAN	Fatty acid-binding protein 5 (Epidermal-type fatty acid-binding protein) (E-FABP) (Fatty acid-binding protein, epidermal) (Psoriasis-associated fatty acid-binding protein homolog) (PA-FABP)	FABP5	2171
P08185	CBG_HUMAN	Corticosteroid-binding globulin (CBG) (Serpin A6) (Transcortin)	SERPINA6	866
Q99720	SGMR1_HUMAN	Sigma non-opioid intracellular receptor 1 (Aging-associated gene 8 protein) (SR31747-binding protein) (SR-BP) (Sigma 1-type opioid receptor) (SIG-1R) (Sigma1-receptor) (Sigma1R) (hSigmaR1)	SIGMAR1	10280
P37231	PPARG_HUMAN	Peroxisome proliferator-activated receptor gamma (PPAR-gamma) (Nuclear receptor subfamily 1 group C member 3)	PPARG	5468
Q07869	PPARA_HUMAN	Peroxisome proliferator-activated receptor alpha (PPAR-alpha) (Nuclear receptor subfamily 1 group C member 1)	PPARA	5465
O75762	TRPA1_HUMAN	Transient receptor potential cation channel subfamily A member 1 (Ankyrin-like with transmembrane domains protein 1) (Transformation-sensitive protein p120) (Wasabi receptor)	TRPA1	8989
P04035	HMDH_HUMAN	3-hydroxy-3-methylglutaryl-coenzyme A reductase (HMG-CoA reductase) (EC 1.1.1.34)	HMGCR	3156
Q16850	CP51A_HUMAN	Lanosterol 14-alpha demethylase (LDM) (EC 1.14.14.154) (CYPLI) (Cytochrome P450 51A1) (Cytochrome P450-14DM) (Cytochrome P45014DM) (Cytochrome P450LI) (Sterol 14-alpha demethylase)	CYP51A1	1595
P28845	DHI1_HUMAN	Corticosteroid 11-beta-dehydrogenase isozyme 1 (EC 1.1.1.146) (11-beta-hydroxysteroid dehydrogenase 1) (11-DH) (11-beta-HSD1) (Short chain dehydrogenase/reductase family 26C member 1)	HSD11B1	3290
O14684	PTGES_HUMAN	Prostaglandin E synthase (EC 5.3.99.3) (Microsomal glutathione S-transferase 1-like 1) (MGST1-L1) (Microsomal prostaglandin E synthase 1) (MPGES-1) (p53-induced gene 12 protein)	PTGES	9536
Q9UHC9	NPCL1_HUMAN	NPC1-like intracellular cholesterol transporter 1 (Niemann-Pick C1-like protein 1)	NPC1L1	29881
P49354	FNTA_HUMAN	Protein farnesyltransferase/geranylgeranyltransferase type-1 subunit alpha (EC 2.5.1.58) (EC 2.5.1.59) (CAAX farnesyltransferase subunit alpha) (FTase-alpha) (Ras proteins prenyltransferase subunit alpha) (Type I protein geranyl-geranyltransferase subunit alpha) (GGTase-I-alpha)	FNTA	2339
P49356	FNTB_HUMAN	Protein farnesyltransferase subunit beta (FTase-beta) (EC 2.5.1.58) (CAAX farnesyltransferase subunit beta) (Ras proteins prenyltransferase subunit beta)	FNTB	100529261,2342
P11413	G6PD_HUMAN	Glucose-6-phosphate 1-dehydrogenase (G6PD) (EC 1.1.1.49)	G6PD	2539
Q13133	NR1H3_HUMAN	Oxysterols receptor LXR-alpha (Liver X receptor alpha) (Nuclear receptor subfamily 1 group H member 3)	NR1H3	10062
P14060	3BHS1_HUMAN	3 beta-hydroxysteroid dehydrogenase/Delta 5-->4-isomerase type 1 (3 beta-hydroxysteroid dehydrogenase/Delta 5-->4-isomerase type I) (3-beta-HSD I) (3-beta-hydroxy-5-ene steroid dehydrogenase) (3-beta-hydroxy-Delta(5)-steroid dehydrogenase) (EC 1.1.1.145) (3-beta-hydroxysteroid 3-dehydrogenase) (EC 1.1.1.270) (Delta-5-3-ketosteroid isomerase) (Dihydrotestosterone oxidoreductase) (EC 1.1.1.210) (St…	HSD3B1	3283
O00748	EST2_HUMAN	Cocaine esterase (EC 3.1.1.84) (Carboxylesterase 2) (CE-2) (hCE-2) (EC 3.1.1.1) (Methylumbelliferyl-acetate deacetylase 2) (EC 3.1.1.56)	CES2	8824
P27361	MK03_HUMAN	Mitogen-activated protein kinase 3 (MAP kinase 3) (MAPK 3) (EC 2.7.11.24) (ERT2) (Extracellular signal-regulated kinase 1) (ERK-1) (Insulin-stimulated MAP2 kinase) (MAP kinase isoform p44) (p44-MAPK) (Microtubule-associated protein 2 kinase) (p44-ERK1)	MAPK3	5595
O00767	ACOD_HUMAN	Acyl-CoA desaturase (EC 1.14.19.1) (Delta(9)-desaturase) (Delta-9 desaturase) (Fatty acid desaturase) (Stearoyl-CoA desaturase) (hSCD1)	SCD	6319
P56937	DHB7_HUMAN	3-keto-steroid reductase (EC 1.1.1.270) (17-beta-hydroxysteroid dehydrogenase 7) (17-beta-HSD 7) (Estradiol 17-beta-dehydrogenase 7) (EC 1.1.1.62) (Short chain dehydrogenase/reductase family 37C member 1)	HSD17B7	51478
P06746	DPOLB_HUMAN	DNA polymerase beta (EC 2.7.7.7) (EC 4.2.99.-)	POLB	5423
P10586	PTPRF_HUMAN	Receptor-type tyrosine-protein phosphatase F (EC 3.1.3.48) (Leukocyte common antigen related) (LAR)	PTPRF	5792
P24666	PPAC_HUMAN	Low molecular weight phosphotyrosine protein phosphatase (LMW-PTP) (LMW-PTPase) (EC 3.1.3.48) (Adipocyte acid phosphatase) (Low molecular weight cytosolic acid phosphatase) (EC 3.1.3.2) (Red cell acid phosphatase 1)	ACP1	52
P34998	CRFR1_HUMAN	Corticotropin-releasing factor receptor 1 (CRF-R-1) (CRF-R1) (CRFR-1) (Corticotropin-releasing hormone receptor 1) (CRH-R-1) (CRH-R1)	CRHR1	104909134,1394
Q07820	MCL1_HUMAN	Induced myeloid leukemia cell differentiation protein Mcl-1 (Bcl-2-like protein 3) (Bcl2-L-3) (Bcl-2-related protein EAT/mcl1) (mcl1/EAT)	MCL1	4170
P00747	PLMN_HUMAN	Plasminogen (EC 3.4.21.7) [Cleaved into: Plasmin heavy chain A; Activation peptide; Angiostatin; Plasmin heavy chain A, short form; Plasmin light chain B]	PLG	5340
P51449	RORG_HUMAN	Nuclear receptor ROR-gamma (Nuclear receptor RZR-gamma) (Nuclear receptor subfamily 1 group F member 3) (RAR-related orphan receptor C) (Retinoid-related orphan receptor-gamma)	RORC	6097
P03372	ESR1_HUMAN	Estrogen receptor (ER) (ER-alpha) (Estradiol receptor) (Nuclear receptor subfamily 3 group A member 1)	ESR1	2099
Q12772	SRBP2_HUMAN	Sterol regulatory element-binding protein 2 (SREBP-2) (Class D basic helix-loop-helix protein 2) (bHLHd2) (Sterol regulatory element-binding transcription factor 2) [Cleaved into: Processed sterol regulatory element-binding protein 2]	SREBF2	6721
P23975	SC6A2_HUMAN	Sodium-dependent noradrenaline transporter (Norepinephrine transporter) (NET) (Solute carrier family 6 member 2)	SLC6A2	6530
P33261	CP2CJ_HUMAN	Cytochrome P450 2C19 (EC 1.14.14.1) ((R)-limonene 6-monooxygenase) (EC 1.14.14.53) ((S)-limonene 6-monooxygenase) (EC 1.14.14.51) ((S)-limonene 7-monooxygenase) (EC 1.14.14.52) (CYPIIC17) (CYPIIC19) (Cytochrome P450-11A) (Cytochrome P450-254C) (Fenbendazole monooxygenase (4'-hydroxylating)) (EC 1.14.14.75) (Mephenytoin 4-hydroxylase)	CYP2C19	1557
P35398	RORA_HUMAN	Nuclear receptor ROR-alpha (Nuclear receptor RZR-alpha) (Nuclear receptor subfamily 1 group F member 1) (RAR-related orphan receptor A) (Retinoid-related orphan receptor-alpha)	RORA	6095
P06276	CHLE_HUMAN	Cholinesterase (EC 3.1.1.8) (Acylcholine acylhydrolase) (Butyrylcholine esterase) (Choline esterase II) (Pseudocholinesterase)	BCHE	590
P31645	SC6A4_HUMAN	Sodium-dependent serotonin transporter (SERT) (5HT transporter) (5HTT) (Solute carrier family 6 member 4)	SLC6A4	6532
P08172	ACM2_HUMAN	Muscarinic acetylcholine receptor M2	CHRM2	1129
P11473	VDR_HUMAN	Vitamin D3 receptor (VDR) (1,25-dihydroxyvitamin D3 receptor) (Nuclear receptor subfamily 1 group I member 1)	VDR	7421
P55055	NR1H2_HUMAN	Oxysterols receptor LXR-beta (Liver X receptor beta) (Nuclear receptor NER) (Nuclear receptor subfamily 1 group H member 2) (Ubiquitously-expressed nuclear receptor)	NR1H2	7376
P23415	GLRA1_HUMAN	Glycine receptor subunit alpha-1 (Glycine receptor 48 kDa subunit) (Glycine receptor strychnine-binding subunit)	GLRA1	2741
P34995	PE2R1_HUMAN	Prostaglandin E2 receptor EP1 subtype (PGE receptor EP1 subtype) (PGE2 receptor EP1 subtype) (Prostanoid EP1 receptor)	PTGER1	5731
P43116	PE2R2_HUMAN	Prostaglandin E2 receptor EP2 subtype (PGE receptor EP2 subtype) (PGE2 receptor EP2 subtype) (Prostanoid EP2 receptor)	PTGER2	5732
P30304	MPIP1_HUMAN	M-phase inducer phosphatase 1 (EC 3.1.3.48) (Dual specificity phosphatase Cdc25A)	CDC25A	993
Q03181	PPARD_HUMAN	Peroxisome proliferator-activated receptor delta (PPAR-delta) (NUCI) (Nuclear hormone receptor 1) (NUC1) (Nuclear receptor subfamily 1 group C member 2) (Peroxisome proliferator-activated receptor beta) (PPAR-beta)	PPARD	5467
Q9UBM7	DHCR7_HUMAN	7-dehydrocholesterol reductase (7-DHC reductase) (EC 1.3.1.21) (Delta7-sterol reductase) (Sterol Delta(7)-reductase) (Sterol reductase SR-2)	DHCR7	1717
Q14534	ERG1_HUMAN	Squalene monooxygenase (EC 1.14.14.17) (Squalene epoxidase) (SE)	SQLE	6713
P37268	FDFT_HUMAN	Squalene synthase (SQS) (SS) (EC 2.5.1.21) (FPP:FPP farnesyltransferase) (Farnesyl-diphosphate farnesyltransferase) (Farnesyl-diphosphate farnesyltransferase 1)	FDFT1	2222
P35228	NOS2_HUMAN	Nitric oxide synthase, inducible (EC 1.14.13.39) (Hepatocyte NOS) (HEP-NOS) (Inducible NO synthase) (Inducible NOS) (iNOS) (NOS type II) (Peptidyl-cysteine S-nitrosylase NOS2)	NOS2	4843
P30305	MPIP2_HUMAN	M-phase inducer phosphatase 2 (EC 3.1.3.48) (Dual specificity phosphatase Cdc25B)	CDC25B	994
P16662	UD2B7_HUMAN	UDP-glucuronosyltransferase 2B7 (UDPGT 2B7) (EC 2.4.1.17) (3,4-catechol estrogen-specific UDPGT) (UDP-glucuronosyltransferase 2B9) (UDPGT 2B9) (UDPGTh-2)	UGT2B7	7364
P80365	DHI2_HUMAN	Corticosteroid 11-beta-dehydrogenase isozyme 2 (EC 1.1.1.-) (11-beta-hydroxysteroid dehydrogenase type 2) (11-DH2) (11-beta-HSD2) (11-beta-hydroxysteroid dehydrogenase type II) (11-HSD type II) (11-beta-HSD type II) (NAD-dependent 11-beta-hydroxysteroid dehydrogenase) (11-beta-HSD) (Short chain dehydrogenase/reductase family 9C member 3)	HSD11B2	3291
P35354	PGH2_HUMAN	Prostaglandin G/H synthase 2 (EC 1.14.99.1) (Cyclooxygenase-2) (COX-2) (PHS II) (Prostaglandin H2 synthase 2) (PGH synthase 2) (PGHS-2) (Prostaglandin-endoperoxide synthase 2)	PTGS2	5743
P13569	CFTR_HUMAN	Cystic fibrosis transmembrane conductance regulator (CFTR) (ATP-binding cassette sub-family C member 7) (Channel conductance-controlling ATPase) (EC 5.6.1.6) (cAMP-dependent chloride channel)	CFTR	1080
Q16875	F263_HUMAN	6-phosphofructo-2-kinase/fructose-2,6-bisphosphatase 3 (6PF-2-K/Fru-2,6-P2ase 3) (PFK/FBPase 3) (6PF-2-K/Fru-2,6-P2ase brain/placenta-type isozyme) (Renal carcinoma antigen NY-REN-56) (iPFK-2) [Includes: 6-phosphofructo-2-kinase (EC 2.7.1.105); Fructose-2,6-bisphosphatase (EC 3.1.3.46)]	PFKFB3	5209
P04745	AMY1_HUMAN	Alpha-amylase 1 (EC 3.2.1.1) (1,4-alpha-D-glucan glucanohydrolase 1) (Salivary alpha-amylase)	AMY1A	276,277,278
P43250	GRK6_HUMAN	G protein-coupled receptor kinase 6 (EC 2.7.11.16) (G protein-coupled receptor kinase GRK6)	GRK6	2870
P14416	DRD2_HUMAN	D(2) dopamine receptor (Dopamine D2 receptor)	DRD2	1813
Q15465	SHH_HUMAN	Sonic hedgehog protein (SHH) (HHG-1) (Shh unprocessed N-terminal signaling and C-terminal autoprocessing domains) (ShhNC) [Cleaved into: Sonic hedgehog protein N-product (ShhN) (Shh N-terminal processed signaling domains) (ShhNp)]	SHH	6469
P48147	PPCE_HUMAN	Prolyl endopeptidase (PE) (EC 3.4.21.26) (Post-proline cleaving enzyme)	PREP	5550
P45984	MK09_HUMAN	Mitogen-activated protein kinase 9 (MAP kinase 9) (MAPK 9) (EC 2.7.11.24) (JNK-55) (Stress-activated protein kinase 1a) (SAPK1a) (Stress-activated protein kinase JNK2) (c-Jun N-terminal kinase 2)	MAPK9	5601
P31639	SC5A2_HUMAN	Sodium/glucose cotransporter 2 (Na(+)/glucose cotransporter 2) (Low affinity sodium-glucose cotransporter) (Solute carrier family 5 member 2)	SLC5A2	6524
Q01959	SC6A3_HUMAN	Sodium-dependent dopamine transporter (DA transporter) (DAT) (Solute carrier family 6 member 3)	SLC6A3	6531
P25105	PTAFR_HUMAN	Platelet-activating factor receptor (PAF-R) (PAFr)	PTAFR	5724
P35610	SOAT1_HUMAN	Sterol O-acyltransferase 1 (EC 2.3.1.26) (Acyl-coenzyme A:cholesterol acyltransferase 1) (ACAT-1) (Cholesterol acyltransferase 1)	SOAT1	6646
O75908	SOAT2_HUMAN	Sterol O-acyltransferase 2 (EC 2.3.1.26) (Acyl-coenzyme A:cholesterol acyltransferase 2) (ACAT-2) (Cholesterol acyltransferase 2)	SOAT2	8435
Q16665	HIF1A_HUMAN	Hypoxia-inducible factor 1-alpha (HIF-1-alpha) (HIF1-alpha) (ARNT-interacting protein) (Basic-helix-loop-helix-PAS protein MOP1) (Class E basic helix-loop-helix protein 78) (bHLHe78) (Member of PAS protein 1) (PAS domain-containing protein 8)	HIF1A	3091
O14842	FFAR1_HUMAN	Free fatty acid receptor 1 (G-protein coupled receptor 40)	FFAR1	2864
P24557	THAS_HUMAN	Thromboxane-A synthase (TXA synthase) (TXS) (EC 5.3.99.5) (Cytochrome P450 5A1)	TBXAS1	6916
P43681	ACHA4_HUMAN	Neuronal acetylcholine receptor subunit alpha-4	CHRNA4	1137
P17787	ACHB2_HUMAN	Neuronal acetylcholine receptor subunit beta-2	CHRNB2	1141
P36544	ACHA7_HUMAN	Neuronal acetylcholine receptor subunit alpha-7	CHRNA7	1139,89832
P32297	ACHA3_HUMAN	Neuronal acetylcholine receptor subunit alpha-3	CHRNA3	1136
P30926	ACHB4_HUMAN	Neuronal acetylcholine receptor subunit beta-4	CHRNB4	1143
Q05193	DYN1_HUMAN	Dynamin-1 (EC 3.6.5.5)	DNM1	1759
P07099	HYEP_HUMAN	Epoxide hydrolase 1 (EC 3.3.2.9) (Epoxide hydratase) (Microsomal epoxide hydrolase) (mEH)	EPHX1	2052
Q02083	NAAA_HUMAN	N-acylethanolamine-hydrolyzing acid amidase (EC 3.5.1.60) (Acid ceramidase-like protein) (N-acylsphingosine amidohydrolase-like) (ASAH-like protein) [Cleaved into: N-acylethanolamine-hydrolyzing acid amidase subunit alpha; N-acylethanolamine-hydrolyzing acid amidase subunit beta]	NAAA	27163
Q6QHF9	PAOX_HUMAN	Peroxisomal N(1)-acetyl-spermine/spermidine oxidase (EC 1.5.3.13) (Polyamine oxidase)	PAOX	196743
P41594	GRM5_HUMAN	Metabotropic glutamate receptor 5 (mGluR5)	GRM5	2915
P08514	ITA2B_HUMAN	Integrin alpha-IIb (GPalpha IIb) (GPIIb) (Platelet membrane glycoprotein IIb) (CD antigen CD41) [Cleaved into: Integrin alpha-IIb heavy chain; Integrin alpha-IIb light chain, form 1; Integrin alpha-IIb light chain, form 2]	ITGA2B	3674
P05106	ITB3_HUMAN	Integrin beta-3 (Platelet membrane glycoprotein IIIa) (GPIIIa) (CD antigen CD61)	ITGB3	3690
P07711	CATL1_HUMAN	Cathepsin L1 (EC 3.4.22.15) (Cathepsin L) (Major excreted protein) (MEP) [Cleaved into: Cathepsin L1 heavy chain; Cathepsin L1 light chain]	CTSL	1514
P07858	CATB_HUMAN	Cathepsin B (EC 3.4.22.1) (APP secretase) (APPS) (Cathepsin B1) [Cleaved into: Cathepsin B light chain; Cathepsin B heavy chain]	CTSB	1508
Q9H4A4	AMPB_HUMAN	Aminopeptidase B (AP-B) (EC 3.4.11.6) (Arginine aminopeptidase) (Arginyl aminopeptidase)	RNPEP	6051
Q9ULA0	DNPEP_HUMAN	Aspartyl aminopeptidase (EC 3.4.11.21)	DNPEP	23549
P11229	ACM1_HUMAN	Muscarinic acetylcholine receptor M1	CHRM1	1128
P34913	HYES_HUMAN	Bifunctional epoxide hydrolase 2 [Includes: Cytosolic epoxide hydrolase 2 (CEH) (EC 3.3.2.10) (Epoxide hydratase) (Soluble epoxide hydrolase) (SEH); Lipid-phosphate phosphatase (EC 3.1.3.76)]	EPHX2	2053
Q9UHL4	DPP2_HUMAN	Dipeptidyl peptidase 2 (EC 3.4.14.2) (Dipeptidyl aminopeptidase II) (Dipeptidyl peptidase 7) (Dipeptidyl peptidase II) (DPP II) (Quiescent cell proline dipeptidase)	DPP7	29952
P46098	5HT3A_HUMAN	5-hydroxytryptamine receptor 3A (5-HT3-A) (5-HT3A) (5-hydroxytryptamine receptor 3) (5-HT-3) (5-HT3R) (Serotonin receptor 3A) (Serotonin-gated ion channel receptor)	HTR3A	3359
P28222	5HT1B_HUMAN	5-hydroxytryptamine receptor 1B (5-HT-1B) (5-HT1B) (S12) (Serotonin 1D beta receptor) (5-HT-1D-beta) (Serotonin receptor 1B)	HTR1B	3351
P28221	5HT1D_HUMAN	5-hydroxytryptamine receptor 1D (5-HT-1D) (5-HT1D) (Serotonin 1D alpha receptor) (5-HT-1D-alpha) (Serotonin receptor 1D)	HTR1D	3352
P27487	DPP4_HUMAN	Dipeptidyl peptidase 4 (EC 3.4.14.5) (ADABP) (Adenosine deaminase complexing protein 2) (ADCP-2) (Dipeptidyl peptidase IV) (DPP IV) (T-cell activation antigen CD26) (TP103) (CD antigen CD26) [Cleaved into: Dipeptidyl peptidase 4 membrane form (Dipeptidyl peptidase IV membrane form); Dipeptidyl peptidase 4 soluble form (Dipeptidyl peptidase IV soluble form)]	DPP4	1803
Q6V1X1	DPP8_HUMAN	Dipeptidyl peptidase 8 (DP8) (EC 3.4.14.5) (Dipeptidyl peptidase IV-related protein 1) (DPRP-1) (Dipeptidyl peptidase VIII) (DPP VIII) (Prolyl dipeptidase DPP8)	DPP8	54878
Q86TI2	DPP9_HUMAN	Dipeptidyl peptidase 9 (DP9) (EC 3.4.14.5) (Dipeptidyl peptidase IV-related protein 2) (DPRP-2) (Dipeptidyl peptidase IX) (DPP IX) (Dipeptidyl peptidase-like protein 9) (DPLP9)	DPP9	91039
P08173	ACM4_HUMAN	Muscarinic acetylcholine receptor M4	CHRM4	1132
P08912	ACM5_HUMAN	Muscarinic acetylcholine receptor M5	CHRM5	1133
P20309	ACM3_HUMAN	Muscarinic acetylcholine receptor M3	CHRM3	1131
O15379	HDAC3_HUMAN	Histone deacetylase 3 (HD3) (EC 3.5.1.98) (RPD3-2) (SMAP45)	HDAC3	8841
Q9UBN7	HDAC6_HUMAN	Histone deacetylase 6 (HD6) (EC 3.5.1.98) (Tubulin-lysine deacetylase HDAC6) (EC 3.5.1.-)	HDAC6	10013
Q92769	HDAC2_HUMAN	Histone deacetylase 2 (HD2) (EC 3.5.1.98)	HDAC2	3066
Q9Y618	NCOR2_HUMAN	Nuclear receptor corepressor 2 (N-CoR2) (CTG repeat protein 26) (SMAP270) (Silencing mediator of retinoic acid and thyroid hormone receptor) (SMRT) (T3 receptor-associating factor) (TRAC) (Thyroid-, retinoic-acid-receptor-associated corepressor)	NCOR2	9612
P53582	MAP11_HUMAN	Methionine aminopeptidase 1 (MAP 1) (MetAP 1) (EC 3.4.11.18) (Peptidase M 1)	METAP1	23173
Q9BY41	HDAC8_HUMAN	Histone deacetylase 8 (HD8) (EC 3.5.1.98)	HDAC8	55869
Q96DB2	HDA11_HUMAN	Histone deacetylase 11 (HD11) (EC 3.5.1.98)	HDAC11	79885
Q969S8	HDA10_HUMAN	Polyamine deacetylase HDAC10 (EC 3.5.1.48) (EC 3.5.1.62) (Histone deacetylase 10) (HD10)	HDAC10	83933
P21728	DRD1_HUMAN	D(1A) dopamine receptor (Dopamine D1 receptor)	DRD1	1812
P22894	MMP8_HUMAN	Neutrophil collagenase (EC 3.4.24.34) (Matrix metalloproteinase-8) (MMP-8) (PMNL collagenase) (PMNL-CL)	MMP8	4317
P07327	ADH1A_HUMAN	Alcohol dehydrogenase 1A (EC 1.1.1.1) (Alcohol dehydrogenase subunit alpha)	ADH1A	124
P00326	ADH1G_HUMAN	Alcohol dehydrogenase 1C (EC 1.1.1.1) (Alcohol dehydrogenase subunit gamma)	ADH1C	126
Q8WTV0	SCRB1_HUMAN	Scavenger receptor class B member 1 (SRB1) (CD36 and LIMPII analogous 1) (CLA-1) (CD36 antigen-like 1) (Collagen type I receptor, thrombospondin receptor-like 1) (SR-BI) (CD antigen CD36)	SCARB1	949
P43235	CATK_HUMAN	Cathepsin K (EC 3.4.22.38) (Cathepsin O) (Cathepsin O2) (Cathepsin X)	CTSK	1513
P08473	NEP_HUMAN	Neprilysin (EC 3.4.24.11) (Atriopeptidase) (Common acute lymphocytic leukemia antigen) (CALLA) (Enkephalinase) (Neutral endopeptidase 24.11) (NEP) (Neutral endopeptidase) (Skin fibroblast elastase) (SFE) (CD antigen CD10)	MME	4311
O60678	ANM3_HUMAN	Protein arginine N-methyltransferase 3 (EC 2.1.1.-) (Heterogeneous nuclear ribonucleoprotein methyltransferase-like protein 3)	PRMT3	10196
O15244	S22A2_HUMAN	Solute carrier family 22 member 2 (Organic cation transporter 2) (hOCT2)	SLC22A2	6582
Q96FL8	S47A1_HUMAN	Multidrug and toxin extrusion protein 1 (MATE-1) (hMATE-1) (Solute carrier family 47 member 1)	SLC47A1	55244
O95264	5HT3B_HUMAN	5-hydroxytryptamine receptor 3B (5-HT3-B) (5-HT3B) (Serotonin receptor 3B)	HTR3B	9177
P17252	KPCA_HUMAN	Protein kinase C alpha type (PKC-A) (PKC-alpha) (EC 2.7.11.13)	PRKCA	5578
P04066	FUCO_HUMAN	Tissue alpha-L-fucosidase (EC 3.2.1.51) (Alpha-L-fucosidase I) (Alpha-L-fucoside fucohydrolase 1) (Alpha-L-fucosidase 1)	FUCA1	2517
P00797	RENI_HUMAN	Renin (EC 3.4.23.15) (Angiotensinogenase)	REN	5972
P30532	ACHA5_HUMAN	Neuronal acetylcholine receptor subunit alpha-5	CHRNA5	1138
Q15822	ACHA2_HUMAN	Neuronal acetylcholine receptor subunit alpha-2	CHRNA2	1135
Q14524	SCN5A_HUMAN	Sodium channel protein type 5 subunit alpha (HH1) (Sodium channel protein cardiac muscle subunit alpha) (Sodium channel protein type V subunit alpha) (Voltage-gated sodium channel subunit alpha Nav1.5)	SCN5A	6331
Q12809	KCNH2_HUMAN	Potassium voltage-gated channel subfamily H member 2 (Eag homolog) (Ether-a-go-go-related gene potassium channel 1) (ERG-1) (Eag-related protein 1) (Ether-a-go-go-related protein 1) (H-ERG) (hERG-1) (hERG1) (Voltage-gated potassium channel subunit Kv11.1)	KCNH2	3757
P22460	KCNA5_HUMAN	Potassium voltage-gated channel subfamily A member 5 (HPCN1) (Voltage-gated potassium channel HK2) (Voltage-gated potassium channel subunit Kv1.5)	KCNA5	3741
Q16739	CEGT_HUMAN	Ceramide glucosyltransferase (EC 2.4.1.80) (GLCT-1) (Glucosylceramide synthase) (GCS) (UDP-glucose ceramide glucosyltransferase) (UDP-glucose:N-acylsphingosine D-glucosyltransferase)	UGCG	7357
P04062	GLCM_HUMAN	Lysosomal acid glucosylceramidase (Lysosomal acid GCase) (EC 3.2.1.45) (Acid beta-glucosidase) (Alglucerase) (Beta-glucocerebrosidase) (Beta-GC) (Cholesterol glucosyltransferase) (SGTase) (EC 2.4.1.-) (Cholesteryl-beta-glucosidase) (EC 3.2.1.104) (D-glucosyl-N-acylsphingosine glucohydrolase) (Imiglucerase)	GBA	2629
Q9HCG7	GBA2_HUMAN	Non-lysosomal glucosylceramidase (NLGase) (EC 3.2.1.45) (Beta-glucocerebrosidase 2) (Beta-glucosidase 2) (Bile acid beta-glucosidase GBA2) (Bile acid glucosyl transferase GBA2) (Cholesterol glucosyltransferase GBA2) (EC 2.4.1.-) (Cholesteryl-beta-glucosidase GBA2) (EC 3.2.1.104) (Glucosylceramidase 2)	GBA2	57704
P35348	ADA1A_HUMAN	Alpha-1A adrenergic receptor (Alpha-1A adrenoreceptor) (Alpha-1A adrenoceptor) (Alpha-1C adrenergic receptor) (Alpha-adrenergic receptor 1c)	ADRA1A	148
Q5R387	PA2GC_HUMAN	Putative inactive group IIC secretory phospholipase A2 (Phosphatidylcholine 2-acylhydrolase-like protein GIIC)	PLA2G2C	1803
O15496	PA2GX_HUMAN	Group 10 secretory phospholipase A2 (EC 3.1.1.4) (Group X secretory phospholipase A2) (GX sPLA2) (sPLA2-X) (Phosphatidylcholine 2-acylhydrolase 10)	PLA2G10	8399
Q14832	GRM3_HUMAN	Metabotropic glutamate receptor 3 (mGluR3)	GRM3	2913
O00222	GRM8_HUMAN	Metabotropic glutamate receptor 8 (mGluR8)	GRM8	2918
O15303	GRM6_HUMAN	Metabotropic glutamate receptor 6 (mGluR6)	GRM6	2916
Q14416	GRM2_HUMAN	Metabotropic glutamate receptor 2 (mGluR2)	GRM2	2912
P35462	DRD3_HUMAN	D(3) dopamine receptor (Dopamine D3 receptor)	DRD3	1814
P08908	5HT1A_HUMAN	5-hydroxytryptamine receptor 1A (5-HT-1A) (5-HT1A) (G-21) (Serotonin receptor 1A)	HTR1A	3350
P35408	PE2R4_HUMAN	Prostaglandin E2 receptor EP4 subtype (PGE receptor EP4 subtype) (PGE2 receptor EP4 subtype) (Prostanoid EP4 receptor)	PTGER4	5734
O75116	ROCK2_HUMAN	Rho-associated protein kinase 2 (EC 2.7.11.1) (Rho kinase 2) (Rho-associated, coiled-coil-containing protein kinase 2) (Rho-associated, coiled-coil-containing protein kinase II) (ROCK-II) (p164 ROCK-2)	ROCK2	9475
Q13464	ROCK1_HUMAN	Rho-associated protein kinase 1 (EC 2.7.11.1) (Renal carcinoma antigen NY-REN-35) (Rho-associated, coiled-coil-containing protein kinase 1) (Rho-associated, coiled-coil-containing protein kinase I) (ROCK-I) (p160 ROCK-1) (p160ROCK)	ROCK1	6093
P23458	JAK1_HUMAN	Tyrosine-protein kinase JAK1 (EC 2.7.10.2) (Janus kinase 1) (JAK-1)	JAK1	3716
Q9UKP6	UR2R_HUMAN	Urotensin-2 receptor (UR-2-R) (G-protein coupled receptor 14) (Urotensin II receptor) (UR-II-R)	UTS2R	2837
Q05901	ACHB3_HUMAN	Neuronal acetylcholine receptor subunit beta-3	CHRNB3	1142
Q15825	ACHA6_HUMAN	Neuronal acetylcholine receptor subunit alpha-6	CHRNA6	8973
Q9Y233	PDE10_HUMAN	cAMP and cAMP-inhibited cGMP 3',5'-cyclic phosphodiesterase 10A (EC 3.1.4.17) (EC 3.1.4.35)	PDE10A	10846
P07550	ADRB2_HUMAN	Beta-2 adrenergic receptor (Beta-2 adrenoreceptor) (Beta-2 adrenoceptor)	ADRB2	154
P39877	PA2G5_HUMAN	Phospholipase A2 group V (EC 3.1.1.4) (PLA2-10) (Phosphatidylcholine 2-acylhydrolase 5)	PLA2G5	5322
P53634	CATC_HUMAN	Dipeptidyl peptidase 1 (EC 3.4.14.1) (Cathepsin C) (Cathepsin J) (Dipeptidyl peptidase I) (DPP-I) (DPPI) (Dipeptidyl transferase) [Cleaved into: Dipeptidyl peptidase 1 exclusion domain chain (Dipeptidyl peptidase I exclusion domain chain); Dipeptidyl peptidase 1 heavy chain (Dipeptidyl peptidase I heavy chain); Dipeptidyl peptidase 1 light chain (Dipeptidyl peptidase I light chain)]	CTSC	1075
Q9UIF8	BAZ2B_HUMAN	Bromodomain adjacent to zinc finger domain protein 2B (hWALp4)	BAZ2B	29994
Q9UIF9	BAZ2A_HUMAN	Bromodomain adjacent to zinc finger domain protein 2A (Transcription termination factor I-interacting protein 5) (TTF-I-interacting protein 5) (Tip5) (hWALp3)	BAZ2A	11176
P48067	SC6A9_HUMAN	Sodium- and chloride-dependent glycine transporter 1 (GlyT-1) (GlyT1) (Solute carrier family 6 member 9)	SLC6A9	6536
P25103	NK1R_HUMAN	Substance-P receptor (SPR) (NK-1 receptor) (NK-1R) (Tachykinin receptor 1)	TACR1	6869
Q16572	VACHT_HUMAN	Vesicular acetylcholine transporter (VAChT) (Solute carrier family 18 member 3)	SLC18A3	6572
P52333	JAK3_HUMAN	Tyrosine-protein kinase JAK3 (EC 2.7.10.2) (Janus kinase 3) (JAK-3) (Leukocyte janus kinase) (L-JAK)	JAK3	3718
O60674	JAK2_HUMAN	Tyrosine-protein kinase JAK2 (EC 2.7.10.2) (Janus kinase 2) (JAK-2)	JAK2	3717
P29597	TYK2_HUMAN	Non-receptor tyrosine-protein kinase TYK2 (EC 2.7.10.2)	TYK2	7297
P20142	PEPC_HUMAN	Gastricsin (EC 3.4.23.3) (Pepsinogen C)	PGC	5225
P12821	ACE_HUMAN	Angiotensin-converting enzyme (ACE) (EC 3.2.1.-) (EC 3.4.15.1) (Dipeptidyl carboxypeptidase I) (Kininase II) (CD antigen CD143) [Cleaved into: Angiotensin-converting enzyme, soluble form]	ACE	1636
P28335	5HT2C_HUMAN	5-hydroxytryptamine receptor 2C (5-HT-2C) (5-HT2C) (5-HTR2C) (5-hydroxytryptamine receptor 1C) (5-HT-1C) (5-HT1C) (Serotonin receptor 2C)	HTR2C	3358
P35367	HRH1_HUMAN	Histamine H1 receptor (H1R) (HH1R)	HRH1	3269
O76074	PDE5A_HUMAN	cGMP-specific 3',5'-cyclic phosphodiesterase (EC 3.1.4.35) (cGMP-binding cGMP-specific phosphodiesterase) (CGB-PDE)	PDE5A	8654
P41595	5HT2B_HUMAN	5-hydroxytryptamine receptor 2B (5-HT-2B) (5-HT2B) (Serotonin receptor 2B)	HTR2B	3357
Q9HCR9	PDE11_HUMAN	Dual 3',5'-cyclic-AMP and -GMP phosphodiesterase 11A (EC 3.1.4.35) (EC 3.1.4.53) (cAMP and cGMP phosphodiesterase 11A)	PDE11A	50940
P10635	CP2D6_HUMAN	Cytochrome P450 2D6 (EC 1.14.14.-) (CYPIID6) (Cholesterol 25-hydroxylase) (Cytochrome P450-DB1) (Debrisoquine 4-hydroxylase)	CYP2D6	1565
P28838	AMPL_HUMAN	Cytosol aminopeptidase (EC 3.4.11.1) (Leucine aminopeptidase 3) (LAP-3) (Leucyl aminopeptidase) (Peptidase S) (Proline aminopeptidase) (EC 3.4.11.5) (Prolyl aminopeptidase)	LAP3	51056
Q9H3N8	HRH4_HUMAN	Histamine H4 receptor (H4R) (HH4R) (AXOR35) (G-protein coupled receptor 105) (GPRv53) (Pfi-013) (SP9144)	HRH4	59340
P56470	LEG4_HUMAN	Galectin-4 (Gal-4) (Antigen NY-CO-27) (L-36 lactose-binding protein) (L36LBP) (Lactose-binding lectin 4)	LGALS4	3960
P17931	LEG3_HUMAN	Galectin-3 (Gal-3) (35 kDa lectin) (Carbohydrate-binding protein 35) (CBP 35) (Galactose-specific lectin 3) (Galactoside-binding protein) (GALBP) (IgE-binding protein) (L-31) (Laminin-binding protein) (Lectin L-29) (Mac-2 antigen)	LGALS3	3958
O00214	LEG8_HUMAN	Galectin-8 (Gal-8) (Po66 carbohydrate-binding protein) (Po66-CBP) (Prostate carcinoma tumor antigen 1) (PCTA-1)	LGALS8	3964
P29275	AA2BR_HUMAN	Adenosine receptor A2b	ADORA2B	136
P0DMS8	AA3R_HUMAN	Adenosine receptor A3	ADORA3	140
Q9BZP6	CHIA_HUMAN	Acidic mammalian chitinase (AMCase) (EC 3.2.1.14) (Lung-specific protein TSA1902)	CHIA	27159
O00182	LEG9_HUMAN	Galectin-9 (Gal-9) (Ecalectin) (Tumor antigen HOM-HD-21)	LGALS9	3965
Q99808	S29A1_HUMAN	Equilibrative nucleoside transporter 1 (Equilibrative nitrobenzylmercaptopurine riboside-sensitive nucleoside transporter) (Equilibrative NBMPR-sensitive nucleoside transporter) (Nucleoside transporter, es-type) (Solute carrier family 29 member 1)	SLC29A1	2030
P20839	IMDH1_HUMAN	Inosine-5'-monophosphate dehydrogenase 1 (IMP dehydrogenase 1) (IMPD 1) (IMPDH 1) (EC 1.1.1.205) (IMPDH-I)	IMPDH1	3614
P03956	MMP1_HUMAN	Interstitial collagenase (EC 3.4.24.7) (Fibroblast collagenase) (Matrix metalloproteinase-1) (MMP-1) [Cleaved into: 22 kDa interstitial collagenase; 27 kDa interstitial collagenase]	MMP1	4312
P09237	MMP7_HUMAN	Matrilysin (EC 3.4.24.23) (Matrin) (Matrix metalloproteinase-7) (MMP-7) (Pump-1 protease) (Uterine metalloproteinase)	MMP7	4316
P42892	ECE1_HUMAN	Endothelin-converting enzyme 1 (ECE-1) (EC 3.4.24.71)	ECE1	1889
P60568	IL2_HUMAN	Interleukin-2 (IL-2) (T-cell growth factor) (TCGF) (Aldesleukin)	IL2	3558
P13866	SC5A1_HUMAN	Sodium/glucose cotransporter 1 (Na(+)/glucose cotransporter 1) (High affinity sodium-glucose cotransporter) (Solute carrier family 5 member 1)	SLC5A1	6523
P34972	CNR2_HUMAN	Cannabinoid receptor 2 (CB-2) (CB2) (hCB2) (CX5)	CNR2	1269
P02753	RET4_HUMAN	Retinol-binding protein 4 (Plasma retinol-binding protein) (PRBP) (RBP) [Cleaved into: Plasma retinol-binding protein(1-182); Plasma retinol-binding protein(1-181); Plasma retinol-binding protein(1-179); Plasma retinol-binding protein(1-176)]	RBP4	5950
Q05655	KPCD_HUMAN	Protein kinase C delta type (EC 2.7.11.13) (Tyrosine-protein kinase PRKCD) (EC 2.7.10.2) (nPKC-delta) [Cleaved into: Protein kinase C delta type regulatory subunit; Protein kinase C delta type catalytic subunit (Sphingosine-dependent protein kinase-1) (SDK1)]	PRKCD	5580
O95069	KCNK2_HUMAN	Potassium channel subfamily K member 2 (Outward rectifying potassium channel protein TREK-1) (TREK-1 K(+) channel subunit) (Two pore domain potassium channel TREK-1) (Two pore potassium channel TPKC1)	KCNK2	3776

## Sheet: Table S3 (CS 13)
Table S3 continued. Bioactive components of Cuscutae Semen and their potential targets
Herb_name	Mol ID	Molecule Name	Protein names	Gene name	Uniprot ID	Gene ID
Cuscutae Semen	MOL000098	quercetin	NADPH oxidase 4 (EC 1.6.3.-) (Kidney oxidase-1) (KOX-1) (Kidney superoxide-producing NADPH oxidase) (Renal NAD(P)H-oxidase)	NOX4	Q9NPH5	50507
Cuscutae Semen	MOL000098	quercetin	Vasopressin V2 receptor (V2R) (AVPR V2) (Antidiuretic hormone receptor) (Renal-type arginine vasopressin receptor)	AVPR2	P30518	554
Cuscutae Semen	MOL000098	quercetin	Aldo-keto reductase family 1 member B1 (EC 1.1.1.300) (EC 1.1.1.372) (EC 1.1.1.54) (Aldehyde reductase) (Aldose reductase) (AR) (EC 1.1.1.21)	AKR1B1	P15121	231
Cuscutae Semen	MOL000098	quercetin	Xanthine dehydrogenase/oxidase [Includes: Xanthine dehydrogenase (XD) (EC 1.17.1.4); Xanthine oxidase (XO) (EC 1.17.3.2) (Xanthine oxidoreductase) (XOR)]	XDH	P47989	7498
Cuscutae Semen	MOL000098	quercetin	Amine oxidase [flavin-containing] A (EC 1.4.3.4) (Monoamine oxidase type A) (MAO-A)	MAOA	P21397	4128
Cuscutae Semen	MOL000098	quercetin	Insulin-like growth factor 1 receptor (EC 2.7.10.1) (Insulin-like growth factor I receptor) (IGF-I receptor) (CD antigen CD221) [Cleaved into: Insulin-like growth factor 1 receptor alpha chain; Insulin-like growth factor 1 receptor beta chain]	IGF1R	P08069	3480
Cuscutae Semen	MOL000098	quercetin	Receptor-type tyrosine-protein kinase FLT3 (EC 2.7.10.1) (FL cytokine receptor) (Fetal liver kinase-2) (FLK-2) (Fms-like tyrosine kinase 3) (FLT-3) (Stem cell tyrosine kinase 1) (STK-1) (CD antigen CD135)	FLT3	P36888	2322
Cuscutae Semen	MOL000098	quercetin	Aromatase (EC 1.14.14.14) (CYPXIX) (Cytochrome P-450AROM) (Cytochrome P450 19A1) (Estrogen synthase)	CYP19A1	P11511	1588
Cuscutae Semen	MOL000098	quercetin	Epidermal growth factor receptor (EC 2.7.10.1) (Proto-oncogene c-ErbB-1) (Receptor tyrosine-protein kinase erbB-1)	EGFR	P00533	1956
Cuscutae Semen	MOL000098	quercetin	Prothrombin (EC 3.4.21.5) (Coagulation factor II) [Cleaved into: Activation peptide fragment 1; Activation peptide fragment 2; Thrombin light chain; Thrombin heavy chain]	F2	P00734	2147
Cuscutae Semen	MOL000098	quercetin	Carbonic anhydrase 2 (EC 4.2.1.1) (Carbonate dehydratase II) (Carbonic anhydrase C) (CAC) (Carbonic anhydrase II) (CA-II)	CA2	P00918	760
Cuscutae Semen	MOL000098	quercetin	Serine/threonine-protein kinase pim-1 (EC 2.7.11.1)	PIM1	P11309	5292
Cuscutae Semen	MOL000098	quercetin	Polyunsaturated fatty acid 5-lipoxygenase (EC 1.13.11.-) (Arachidonate 5-lipoxygenase) (5-LO) (5-lipoxygenase) (EC 1.13.11.34)	ALOX5	P09917	240
Cuscutae Semen	MOL000098	quercetin	Aurora kinase B (EC 2.7.11.1) (Aurora 1) (Aurora- and IPL1-like midbody-associated protein 1) (AIM-1) (Aurora/IPL1-related kinase 2) (ARK-2) (Aurora-related kinase 2) (STK-1) (Serine/threonine-protein kinase 12) (Serine/threonine-protein kinase 5) (Serine/threonine-protein kinase aurora-B)	AURKB	Q96GD4	9212
Cuscutae Semen	MOL000098	quercetin	D(4) dopamine receptor (D(2C) dopamine receptor) (Dopamine D4 receptor)	DRD4	P21917	1815
Cuscutae Semen	MOL000098	quercetin	Adenosine receptor A1	ADORA1	P30542	134
Cuscutae Semen	MOL000098	quercetin	Carbonic anhydrase 7 (EC 4.2.1.1) (Carbonate dehydratase VII) (Carbonic anhydrase VII) (CA-VII)	CA7	P43166	766
Cuscutae Semen	MOL000098	quercetin	Lactoylglutathione lyase (EC 4.4.1.5) (Aldoketomutase) (Glyoxalase I) (Glx I) (Ketone-aldehyde mutase) (Methylglyoxalase) (S-D-lactoylglutathione methylglyoxal lyase)	GLO1	Q04760	2739
Cuscutae Semen	MOL000098	quercetin	Myeloperoxidase (MPO) (EC 1.11.2.2) [Cleaved into: Myeloperoxidase; 89 kDa myeloperoxidase; 84 kDa myeloperoxidase; Myeloperoxidase light chain; Myeloperoxidase heavy chain]	MPO	P05164	4353
Cuscutae Semen	MOL000098	quercetin	Phosphatidylinositol 3-kinase regulatory subunit alpha (PI3-kinase regulatory subunit alpha) (PI3K regulatory subunit alpha) (PtdIns-3-kinase regulatory subunit alpha) (Phosphatidylinositol 3-kinase 85 kDa regulatory subunit alpha) (PI3-kinase subunit p85-alpha) (PtdIns-3-kinase regulatory subunit p85-alpha)	PIK3R1	P27986	5295
Cuscutae Semen	MOL000098	quercetin	Adenosine receptor A2a	ADORA2A	P29274	135
Cuscutae Semen	MOL000098	quercetin	Death-associated protein kinase 1 (DAP kinase 1) (EC 2.7.11.1)	DAPK1	P53355	1612
Cuscutae Semen	MOL000098	quercetin	Glycogen phosphorylase, liver form (EC 2.4.1.1)	PYGL	P06737	5836
Cuscutae Semen	MOL000098	quercetin	Carbonic anhydrase 1 (EC 4.2.1.1) (Carbonate dehydratase I) (Carbonic anhydrase B) (CAB) (Carbonic anhydrase I) (CA-I)	CA1	P00915	759
Cuscutae Semen	MOL000098	quercetin	Glycogen synthase kinase-3 beta (GSK-3 beta) (EC 2.7.11.26) (Serine/threonine-protein kinase GSK3B) (EC 2.7.11.1)	GSK3B	P49841	2932
Cuscutae Semen	MOL000098	quercetin	Proto-oncogene tyrosine-protein kinase Src (EC 2.7.10.2) (Proto-oncogene c-Src) (pp60c-src) (p60-Src)	SRC	P12931	6714
Cuscutae Semen	MOL000098	quercetin	Focal adhesion kinase 1 (FADK 1) (EC 2.7.10.2) (Focal adhesion kinase-related nonkinase) (FRNK) (Protein phosphatase 1 regulatory subunit 71) (PPP1R71) (Protein-tyrosine kinase 2) (p125FAK) (pp125FAK)	PTK2	Q05397	5747
Cuscutae Semen	MOL000098	quercetin	Estradiol 17-beta-dehydrogenase 2 (EC 1.1.1.62) (17-beta-hydroxysteroid dehydrogenase type 2) (17-beta-HSD 2) (20 alpha-hydroxysteroid dehydrogenase) (20-alpha-HSD) (E2DH) (Microsomal 17-beta-hydroxysteroid dehydrogenase) (Short chain dehydrogenase/reductase family 9C member 2) (Testosterone 17-beta-dehydrogenase) (EC 1.1.1.239)	HSD17B2	P37059	3294
Cuscutae Semen	MOL000098	quercetin	Vascular endothelial growth factor receptor 2 (VEGFR-2) (EC 2.7.10.1) (Fetal liver kinase 1) (FLK-1) (Kinase insert domain receptor) (KDR) (Protein-tyrosine kinase receptor flk-1) (CD antigen CD309)	KDR	P35968	3791
Cuscutae Semen	MOL000098	quercetin	Collagenase 3 (EC 3.4.24.-) (Matrix metalloproteinase-13) (MMP-13)	MMP13	P45452	4322
Cuscutae Semen	MOL000098	quercetin	Stromelysin-1 (SL-1) (EC 3.4.24.17) (Matrix metalloproteinase-3) (MMP-3) (Transin-1)	MMP3	P08254	4314
Cuscutae Semen	MOL000098	quercetin	Carbonic anhydrase 3 (EC 4.2.1.1) (Carbonate dehydratase III) (Carbonic anhydrase III) (CA-III)	CA3	P07451	761
Cuscutae Semen	MOL000098	quercetin	Polyunsaturated fatty acid lipoxygenase ALOX15 (12/15-lipoxygenase) (Arachidonate 12-lipoxygenase, leukocyte-type) (12-LOX) (EC 1.13.11.31) (Arachidonate 15-lipoxygenase) (15-LOX) (15-LOX-1) (EC 1.13.11.33) (Arachidonate omega-6 lipoxygenase) (Hepoxilin A3 synthase Alox15) (EC 1.13.11.-) (Linoleate 13S-lipoxygenase) (EC 1.13.11.12)	ALOX15	P16050	246
Cuscutae Semen	MOL000098	quercetin	Multidrug resistance-associated protein 1 (EC 7.6.2.2) (ATP-binding cassette sub-family C member 1) (Glutathione-S-conjugate-translocating ATPase ABCC1) (EC 7.6.2.3) (Leukotriene C(4) transporter) (LTC4 transporter)	ABCC1	P33527	4363
Cuscutae Semen	MOL000098	quercetin	Serine/threonine-protein kinase PLK1 (EC 2.7.11.21) (Polo-like kinase 1) (PLK-1) (Serine/threonine-protein kinase 13) (STPK13)	PLK1	P53350	5347
Cuscutae Semen	MOL000098	quercetin	Carbonic anhydrase 6 (EC 4.2.1.1) (Carbonate dehydratase VI) (Carbonic anhydrase VI) (CA-VI) (Salivary carbonic anhydrase) (Secreted carbonic anhydrase)	CA6	P23280	765
Cuscutae Semen	MOL000098	quercetin	Cyclin-dependent kinase 1 (CDK1) (EC 2.7.11.22) (EC 2.7.11.23) (Cell division control protein 2 homolog) (Cell division protein kinase 1) (p34 protein kinase)	CDK1	P06493	983
Cuscutae Semen	MOL000098	quercetin	Matrix metalloproteinase-9 (MMP-9) (EC 3.4.24.35) (92 kDa gelatinase) (92 kDa type IV collagenase) (Gelatinase B) (GELB) [Cleaved into: 67 kDa matrix metalloproteinase-9; 82 kDa matrix metalloproteinase-9]	MMP9	P14780	4318
Cuscutae Semen	MOL000098	quercetin	Carbonic anhydrase 12 (EC 4.2.1.1) (Carbonate dehydratase XII) (Carbonic anhydrase XII) (CA-XII) (Tumor antigen HOM-RCC-3.1.3)	CA12	O43570	771
Cuscutae Semen	MOL000098	quercetin	72 kDa type IV collagenase (EC 3.4.24.24) (72 kDa gelatinase) (Gelatinase A) (Matrix metalloproteinase-2) (MMP-2) (TBE-1) [Cleaved into: PEX]	MMP2	P08253	4313
Cuscutae Semen	MOL000098	quercetin	Serine/threonine-protein kinase N1 (EC 2.7.11.13) (Protease-activated kinase 1) (PAK-1) (Protein kinase C-like 1) (Protein kinase C-like PKN) (Protein kinase PKN-alpha) (Protein-kinase C-related kinase 1) (Serine-threonine protein kinase N)	PKN1	Q16512	5585
Cuscutae Semen	MOL000098	quercetin	Carbonic anhydrase 14 (EC 4.2.1.1) (Carbonate dehydratase XIV) (Carbonic anhydrase XIV) (CA-XIV)	CA14	Q9ULX7	23632
Cuscutae Semen	MOL000098	quercetin	Carbonic anhydrase 9 (EC 4.2.1.1) (Carbonate dehydratase IX) (Carbonic anhydrase IX) (CA-IX) (CAIX) (Membrane antigen MN) (P54/58N) (Renal cell carcinoma-associated antigen G250) (RCC-associated antigen G250) (pMW1)	CA9	Q16790	768
Cuscutae Semen	MOL000098	quercetin	Casein kinase II subunit alpha (CK II alpha) (EC 2.7.11.1)	CSNK2A1	P68400	1457
Cuscutae Semen	MOL000098	quercetin	Polyunsaturated fatty acid lipoxygenase ALOX12 (EC 1.13.11.-) (Arachidonate (12S)-lipoxygenase) (12S-LOX) (12S-lipoxygenase) (EC 1.13.11.31) (Arachidonate (15S)-lipoxygenase) (EC 1.13.11.33) (Linoleate (13S)-lipoxygenase) (Lipoxin synthase 12-LO) (EC 3.3.2.-) (Platelet-type lipoxygenase 12)	ALOX12	P18054	239
Cuscutae Semen	MOL000098	quercetin	Hepatocyte growth factor receptor (HGF receptor) (EC 2.7.10.1) (HGF/SF receptor) (Proto-oncogene c-Met) (Scatter factor receptor) (SF receptor) (Tyrosine-protein kinase Met)	MET	P08581	4233
Cuscutae Semen	MOL000098	quercetin	Carbonic anhydrase 4 (EC 4.2.1.1) (Carbonate dehydratase IV) (Carbonic anhydrase IV) (CA-IV)	CA4	P22748	762
Cuscutae Semen	MOL000098	quercetin	Serine/threonine-protein kinase Nek2 (EC 2.7.11.1) (HSPK 21) (Never in mitosis A-related kinase 2) (NimA-related protein kinase 2) (NimA-like protein kinase 1)	NEK2	P51955	4751
Cuscutae Semen	MOL000098	quercetin	C-X-C chemokine receptor type 1 (CXC-R1) (CXCR-1) (CDw128a) (High affinity interleukin-8 receptor A) (IL-8R A) (IL-8 receptor type 1) (CD antigen CD181)	CXCR1	P25024	3577
Cuscutae Semen	MOL000098	quercetin	Calcium/calmodulin-dependent protein kinase type II subunit beta (CaM kinase II subunit beta) (CaMK-II subunit beta) (EC 2.7.11.17)	CAMK2B	Q13554	816
Cuscutae Semen	MOL000098	quercetin	ALK tyrosine kinase receptor (EC 2.7.10.1) (Anaplastic lymphoma kinase) (CD antigen CD246)	ALK	Q9UM73	238
Cuscutae Semen	MOL000098	quercetin	RAC-alpha serine/threonine-protein kinase (EC 2.7.11.1) (Protein kinase B) (PKB) (Protein kinase B alpha) (PKB alpha) (Proto-oncogene c-Akt) (RAC-PK-alpha)	AKT1	P31749	207
Cuscutae Semen	MOL000098	quercetin	ATP-dependent translocase ABCB1 (ATP-binding cassette sub-family B member 1) (Multidrug resistance protein 1) (EC 7.6.2.2) (P-glycoprotein 1) (Phospholipid transporter ABCB1) (EC 7.6.2.1) (CD antigen CD243)	ABCB1	P08183	5243
Cuscutae Semen	MOL000098	quercetin	Serine/threonine-protein kinase Nek6 (EC 2.7.11.1) (Never in mitosis A-related kinase 6) (NimA-related protein kinase 6) (Protein kinase SID6-1512)	NEK6	Q9HC98	10783
Cuscutae Semen	MOL000098	quercetin	Phospholipase A2 (EC 3.1.1.4) (Group IB phospholipase A2) (Phosphatidylcholine 2-acylhydrolase 1B)	PLA2G1B	P04054	5319
Cuscutae Semen	MOL000098	quercetin	Carbonic anhydrase 5A, mitochondrial (EC 4.2.1.1) (Carbonate dehydratase VA) (Carbonic anhydrase VA) (CA-VA)	CA5A	P35218	763
Cuscutae Semen	MOL000098	quercetin	Beta-secretase 1 (EC 3.4.23.46) (Aspartyl protease 2) (ASP2) (Asp 2) (Beta-site amyloid precursor protein cleaving enzyme 1) (Beta-site APP cleaving enzyme 1) (Memapsin-2) (Membrane-associated aspartic protease 2)	BACE1	P56817	23621
Cuscutae Semen	MOL000098	quercetin	Cytochrome P450 1B1 (EC 1.14.14.1) (CYPIB1) (Hydroperoxy icosatetraenoate dehydratase) (EC 4.2.1.152)	CYP1B1	Q16678	1545
Cuscutae Semen	MOL000098	quercetin	Tyrosine-protein kinase receptor UFO (EC 2.7.10.1) (AXL oncogene)	AXL	P30530	558
Cuscutae Semen	MOL000098	quercetin	Broad substrate specificity ATP-binding cassette transporter ABCG2 (EC 7.6.2.2) (ATP-binding cassette sub-family G member 2) (Breast cancer resistance protein) (CDw338) (Mitoxantrone resistance-associated protein) (Placenta-specific ATP-binding cassette transporter) (Urate exporter) (CD antigen CD338)	ABCG2	Q9UNQ0	9429
Cuscutae Semen	MOL000098	quercetin	NUAK family SNF1-like kinase 1 (EC 2.7.11.1) (AMPK-related protein kinase 5) (ARK5) (Omphalocele kinase 1)	NUAK1	O60285	9891
Cuscutae Semen	MOL000098	quercetin	Aldo-keto reductase family 1 member C2 (EC 1.-.-.-) (3-alpha-HSD3) (Chlordecone reductase homolog HAKRD) (Dihydrodiol dehydrogenase 2) (DD-2) (DD2) (Dihydrodiol dehydrogenase/bile acid-binding protein) (DD/BABP) (Trans-1,2-dihydrobenzene-1,2-diol dehydrogenase) (EC 1.3.1.20) (Type III 3-alpha-hydroxysteroid dehydrogenase) (EC 1.1.1.357)	AKR1C2	P52895	1646
Cuscutae Semen	MOL000098	quercetin	Aldo-keto reductase family 1 member C1 (EC 1.1.1.-) (20-alpha-hydroxysteroid dehydrogenase) (20-alpha-HSD) (EC 1.1.1.149) (Chlordecone reductase homolog HAKRC) (Dihydrodiol dehydrogenase 1/2) (DD1/DD2) (High-affinity hepatic bile acid-binding protein) (HBAB) (Indanol dehydrogenase) (EC 1.1.1.112) (Trans-1,2-dihydrobenzene-1,2-diol dehydrogenase) (EC 1.3.1.20)	AKR1C1	Q04828	1645
Cuscutae Semen	MOL000098	quercetin	Aldo-keto reductase family 1 member C3 (EC 1.-.-.-) (17-beta-hydroxysteroid dehydrogenase type 5) (17-beta-HSD 5) (3-alpha-HSD type II, brain) (3-alpha-hydroxysteroid dehydrogenase type 2) (3-alpha-HSD type 2) (EC 1.1.1.357) (Chlordecone reductase homolog HAKRb) (Dihydrodiol dehydrogenase 3) (DD-3) (DD3) (Dihydrodiol dehydrogenase type I) (HA1753) (Indanol dehydrogenase) (EC 1.1.1.112) (Prostagla…	AKR1C3	P42330	8644
Cuscutae Semen	MOL000098	quercetin	Aldo-keto reductase family 1 member C4 (EC 1.1.1.-) (3-alpha-HSD1) (3-alpha-hydroxysteroid dehydrogenase type I) (EC 1.1.1.357) (Chlordecone reductase) (CDR) (EC 1.1.1.225) (Dihydrodiol dehydrogenase 4) (DD-4) (DD4) (HAKRA)	AKR1C4	P17516	1109
Cuscutae Semen	MOL000098	quercetin	Carbonic anhydrase 13 (EC 4.2.1.1) (Carbonate dehydratase XIII) (Carbonic anhydrase XIII) (CA-XIII)	CA13	Q8N1Q1	377677
Cuscutae Semen	MOL000098	quercetin	Aldo-keto reductase family 1 member A1 (EC 1.1.1.2) (EC 1.1.1.372) (EC 1.1.1.54) (Alcohol dehydrogenase [NADP(+)]) (Aldehyde reductase) (Glucuronate reductase) (EC 1.1.1.19) (Glucuronolactone reductase) (EC 1.1.1.20)	AKR1A1	P14550	10327
Cuscutae Semen	MOL000098	quercetin	G-protein coupled receptor 35 (Kynurenic acid receptor) (KYNA receptor)	GPR35	Q9HC97	2859
Cuscutae Semen	MOL000098	quercetin	Tyrosine-protein kinase SYK (EC 2.7.10.2) (Spleen tyrosine kinase) (p72-Syk)	SYK	P43405	6850
Cuscutae Semen	MOL000098	quercetin	Microtubule-associated protein tau (Neurofibrillary tangle protein) (Paired helical filament-tau) (PHF-tau)	MAPT	P10636	4137
Cuscutae Semen	MOL000098	quercetin	Lysine-specific demethylase 4E (EC 1.14.11.66) (KDM4D-like protein) (Lysine-specific demethylase 4D-like) ([histone H3]-trimethyl-L-lysine(9) demethylase 4E)	KDM4E	B2RXH2	390245
Cuscutae Semen	MOL000098	quercetin	DNA topoisomerase 2-alpha (EC 5.6.2.2) (DNA topoisomerase II, alpha isozyme)	TOP2A	P11388	7153
Cuscutae Semen	MOL000098	quercetin	Insulin receptor (IR) (EC 2.7.10.1) (CD antigen CD220) [Cleaved into: Insulin receptor subunit alpha; Insulin receptor subunit beta]	INSR	P06213	3643
Cuscutae Semen	MOL000098	quercetin	Acetylcholinesterase (AChE) (EC 3.1.1.7)	ACHE	P22303	43
Cuscutae Semen	MOL000098	quercetin	Myosin light chain kinase, smooth muscle (MLCK) (smMLCK) (EC 2.7.11.18) (Kinase-related protein) (KRP) (Telokin) [Cleaved into: Myosin light chain kinase, smooth muscle, deglutamylated form]	MYLK	Q15746	4638
Cuscutae Semen	MOL000098	quercetin	Phosphatidylinositol 4,5-bisphosphate 3-kinase catalytic subunit gamma isoform (PI3-kinase subunit gamma) (PI3K-gamma) (PI3Kgamma) (PtdIns-3-kinase subunit gamma) (EC 2.7.1.153) (Phosphatidylinositol 4,5-bisphosphate 3-kinase 110 kDa catalytic subunit gamma) (PtdIns-3-kinase subunit p110-gamma) (p110gamma) (Phosphoinositide-3-kinase catalytic gamma polypeptide) (Serine/threonine protein kinase PI…	PIK3CG	P48736	5294
Cuscutae Semen	MOL000098	quercetin	DNA-(apurinic or apyrimidinic site) endonuclease (EC 3.1.-.-) (APEX nuclease) (APEN) (Apurinic-apyrimidinic endonuclease 1) (AP endonuclease 1) (APE-1) (REF-1) (Redox factor-1) [Cleaved into: DNA-(apurinic or apyrimidinic site) endonuclease, mitochondrial]	APEX1	P27695	328
Cuscutae Semen	MOL000098	quercetin	Cyclin-dependent kinase 5 activator 1 (CDK5 activator 1) (Cyclin-dependent kinase 5 regulatory subunit 1) (TPKII regulatory subunit) [Cleaved into: Cyclin-dependent kinase 5 activator 1, p35 (p35); Cyclin-dependent kinase 5 activator 1, p25 (p25) (Tau protein kinase II 23 kDa subunit) (p23)]	CDK5R1	Q15078	8851
Cuscutae Semen	MOL000098	quercetin	Cyclin-dependent-like kinase 5 (EC 2.7.11.1) (Cell division protein kinase 5) (Serine/threonine-protein kinase PSSALRE) (Tau protein kinase II catalytic subunit) (TPKII catalytic subunit)	CDK5	Q00535	1020
Cuscutae Semen	MOL000098	quercetin	G2/mitotic-specific cyclin-B3	CCNB3	Q8WWL7	85417
Cuscutae Semen	MOL000098	quercetin	Cyclin-dependent kinase 1 (CDK1) (EC 2.7.11.22) (EC 2.7.11.23) (Cell division control protein 2 homolog) (Cell division protein kinase 1) (p34 protein kinase)	CDK1	P06493	983
Cuscutae Semen	MOL000098	quercetin	G2/mitotic-specific cyclin-B1	CCNB1	P14635	891
Cuscutae Semen	MOL000098	quercetin	G2/mitotic-specific cyclin-B2	CCNB2	O95067	9133
Cuscutae Semen	MOL000098	quercetin	Arginase-1 (EC 3.5.3.1) (Liver-type arginase) (Type I arginase)	ARG1	P05089	383
Cuscutae Semen	MOL000098	quercetin	Receptor-type tyrosine-protein phosphatase S (R-PTP-S) (EC 3.1.3.48) (Receptor-type tyrosine-protein phosphatase sigma) (R-PTP-sigma)	PTPRS	Q13332	5802
Cuscutae Semen	MOL000098	quercetin	Estrogen receptor beta (ER-beta) (Nuclear receptor subfamily 3 group A member 2)	ESR2	Q92731	2100
Cuscutae Semen	MOL000098	quercetin	DNA-3-methyladenine glycosylase (EC 3.2.2.21) (3-alkyladenine DNA glycosylase) (3-methyladenine DNA glycosidase) (ADPG) (N-methylpurine-DNA glycosylase)	MPG	P29372	4350
Cuscutae Semen	MOL000098	quercetin	Solute carrier family 22 member 12 (Organic anion transporter 4-like protein) (Renal-specific transporter) (RST) (Urate anion exchanger 1)	SLC22A12	Q96S37	116085
Cuscutae Semen	MOL000098	quercetin	Cyclin-dependent kinase 6 (EC 2.7.11.22) (Cell division protein kinase 6) (Serine/threonine-protein kinase PLSTIRE)	CDK6	Q00534	1021
Cuscutae Semen	MOL000098	quercetin	Cyclin-dependent kinase 2 (EC 2.7.11.22) (Cell division protein kinase 2) (p33 protein kinase)	CDK2	P24941	1017
Cuscutae Semen	MOL000098	quercetin	Tyrosinase (EC 1.14.18.1) (LB24-AB) (Monophenol monooxygenase) (SK29-AB) (Tumor rejection antigen AB)	TYR	P14679	7299
Cuscutae Semen	MOL000098	quercetin	Estradiol 17-beta-dehydrogenase 1 (EC 1.1.1.62) (17-beta-hydroxysteroid dehydrogenase type 1) (17-beta-HSD 1) (20 alpha-hydroxysteroid dehydrogenase) (20-alpha-HSD) (E2DH) (Placental 17-beta-hydroxysteroid dehydrogenase) (Short chain dehydrogenase/reductase family 28C member 1)	HSD17B1	P14061	3292
Cuscutae Semen	MOL000098	quercetin	Aryl hydrocarbon receptor (Ah receptor) (AhR) (Class E basic helix-loop-helix protein 76) (bHLHe76)	AHR	P35869	196
Cuscutae Semen	MOL000098	quercetin	Steroid hormone receptor ERR1 (Estrogen receptor-like 1) (Estrogen-related receptor alpha) (ERR-alpha) (Nuclear receptor subfamily 3 group B member 1)	ESRRA	P11474	2101
Cuscutae Semen	MOL000098	quercetin	Amyloid-beta precursor protein (APP) (ABPP) (APPI) (Alzheimer disease amyloid protein) (Amyloid precursor protein) (Amyloid-beta A4 protein) (Cerebral vascular amyloid peptide) (CVAP) (PreA4) (Protease nexin-II) (PN-II) [Cleaved into: N-APP; Soluble APP-alpha (S-APP-alpha); Soluble APP-beta (S-APP-beta); C99 (Beta-secretase C-terminal fragment) (Beta-CTF); Amyloid-beta protein 42 (Abeta42) (Beta-…	APP	P05067	351
Cuscutae Semen	MOL000098	quercetin	Poly [ADP-ribose] polymerase 1 (PARP-1) (EC 2.4.2.30) (ADP-ribosyltransferase diphtheria toxin-like 1) (ARTD1) (DNA ADP-ribosyltransferase PARP1) (EC 2.4.2.-) (NAD(+) ADP-ribosyltransferase 1) (ADPRT 1) (Poly[ADP-ribose] synthase 1) (Protein poly-ADP-ribosyltransferase PARP1) (EC 2.4.2.-)	PARP1	P09874	142
Cuscutae Semen	MOL000098	quercetin	Transthyretin (ATTR) (Prealbumin) (TBPA)	TTR	P02766	7276
Cuscutae Semen	MOL000098	quercetin	Macrophage metalloelastase (MME) (EC 3.4.24.65) (Macrophage elastase) (ME) (hME) (Matrix metalloproteinase-12) (MMP-12)	MMP12	P39900	4321
Cuscutae Semen	MOL000098	quercetin	ADP-ribosyl cyclase/cyclic ADP-ribose hydrolase 1 (EC 3.2.2.6) (2'-phospho-ADP-ribosyl cyclase) (2'-phospho-ADP-ribosyl cyclase/2'-phospho-cyclic-ADP-ribose transferase) (EC 2.4.99.20) (2'-phospho-cyclic-ADP-ribose transferase) (ADP-ribosyl cyclase 1) (ADPRC 1) (Cyclic ADP-ribose hydrolase 1) (cADPr hydrolase 1) (T10) (CD antigen CD38)	CD38	P28907	952
Cuscutae Semen	MOL000098	quercetin	Aldo-keto reductase family 1 member B10 (EC 1.1.1.300) (EC 1.1.1.54) (ARL-1) (Aldose reductase-like) (Aldose reductase-related protein) (ARP) (hARP) (Small intestine reductase) (SI reductase)	AKR1B10	O60218	57016
Cuscutae Semen	MOL000098	quercetin	Poly [ADP-ribose] polymerase tankyrase-2 (EC 2.4.2.30) (ADP-ribosyltransferase diphtheria toxin-like 6) (ARTD6) (Poly [ADP-ribose] polymerase 5B) (Protein poly-ADP-ribosyltransferase tankyrase-2) (EC 2.4.2.-) (TNKS-2) (TRF1-interacting ankyrin-related ADP-ribose polymerase 2) (Tankyrase II) (Tankyrase-2) (TANK2) (Tankyrase-like protein) (Tankyrase-related protein)	TNKS2	Q9H2K2	80351
Cuscutae Semen	MOL000098	quercetin	Poly [ADP-ribose] polymerase tankyrase-1 (EC 2.4.2.30) (ADP-ribosyltransferase diphtheria toxin-like 5) (ARTD5) (Poly [ADP-ribose] polymerase 5A) (Protein poly-ADP-ribosyltransferase tankyrase-1) (EC 2.4.2.-) (TNKS-1) (TRF1-interacting ankyrin-related ADP-ribose polymerase) (Tankyrase I) (Tankyrase-1) (TANK1)	TNKS	O95271	8658
Cuscutae Semen	MOL000098	quercetin	DNA topoisomerase 1 (EC 5.6.2.1) (DNA topoisomerase I)	TOP1	P11387	7150
Cuscutae Semen	MOL000098	quercetin	Telomerase reverse transcriptase (EC 2.7.7.49) (HEST2) (Telomerase catalytic subunit) (Telomerase-associated protein 2) (TP2)	TERT	O14746	7015
Cuscutae Semen	MOL000422	kaempferol	NADPH oxidase 4 (EC 1.6.3.-) (Kidney oxidase-1) (KOX-1) (Kidney superoxide-producing NADPH oxidase) (Renal NAD(P)H-oxidase)	NOX4	Q9NPH5	50507
Cuscutae Semen	MOL000422	kaempferol	Aldo-keto reductase family 1 member B1 (EC 1.1.1.300) (EC 1.1.1.372) (EC 1.1.1.54) (Aldehyde reductase) (Aldose reductase) (AR) (EC 1.1.1.21)	AKR1B1	P15121	231
Cuscutae Semen	MOL000422	kaempferol	Xanthine dehydrogenase/oxidase [Includes: Xanthine dehydrogenase (XD) (EC 1.17.1.4); Xanthine oxidase (XO) (EC 1.17.3.2) (Xanthine oxidoreductase) (XOR)]	XDH	P47989	7498
Cuscutae Semen	MOL000422	kaempferol	Tyrosinase (EC 1.14.18.1) (LB24-AB) (Monophenol monooxygenase) (SK29-AB) (Tumor rejection antigen AB)	TYR	P14679	7299
Cuscutae Semen	MOL000422	kaempferol	Receptor-type tyrosine-protein kinase FLT3 (EC 2.7.10.1) (FL cytokine receptor) (Fetal liver kinase-2) (FLK-2) (Fms-like tyrosine kinase 3) (FLT-3) (Stem cell tyrosine kinase 1) (STK-1) (CD antigen CD135)	FLT3	P36888	2322
Cuscutae Semen	MOL000422	kaempferol	Carbonic anhydrase 2 (EC 4.2.1.1) (Carbonate dehydratase II) (Carbonic anhydrase C) (CAC) (Carbonic anhydrase II) (CA-II)	CA2	P00918	760
Cuscutae Semen	MOL000422	kaempferol	Polyunsaturated fatty acid 5-lipoxygenase (EC 1.13.11.-) (Arachidonate 5-lipoxygenase) (5-LO) (5-lipoxygenase) (EC 1.13.11.34)	ALOX5	P09917	240
Cuscutae Semen	MOL000422	kaempferol	Carbonic anhydrase 7 (EC 4.2.1.1) (Carbonate dehydratase VII) (Carbonic anhydrase VII) (CA-VII)	CA7	P43166	766
Cuscutae Semen	MOL000422	kaempferol	Estradiol 17-beta-dehydrogenase 2 (EC 1.1.1.62) (17-beta-hydroxysteroid dehydrogenase type 2) (17-beta-HSD 2) (20 alpha-hydroxysteroid dehydrogenase) (20-alpha-HSD) (E2DH) (Microsomal 17-beta-hydroxysteroid dehydrogenase) (Short chain dehydrogenase/reductase family 9C member 2) (Testosterone 17-beta-dehydrogenase) (EC 1.1.1.239)	HSD17B2	P37059	3294
Cuscutae Semen	MOL000422	kaempferol	Multidrug resistance-associated protein 1 (EC 7.6.2.2) (ATP-binding cassette sub-family C member 1) (Glutathione-S-conjugate-translocating ATPase ABCC1) (EC 7.6.2.3) (Leukotriene C(4) transporter) (LTC4 transporter)	ABCC1	P33527	4363
Cuscutae Semen	MOL000422	kaempferol	Estradiol 17-beta-dehydrogenase 1 (EC 1.1.1.62) (17-beta-hydroxysteroid dehydrogenase type 1) (17-beta-HSD 1) (20 alpha-hydroxysteroid dehydrogenase) (20-alpha-HSD) (E2DH) (Placental 17-beta-hydroxysteroid dehydrogenase) (Short chain dehydrogenase/reductase family 28C member 1)	HSD17B1	P14061	3292
Cuscutae Semen	MOL000422	kaempferol	Aryl hydrocarbon receptor (Ah receptor) (AhR) (Class E basic helix-loop-helix protein 76) (bHLHe76)	AHR	P35869	196
Cuscutae Semen	MOL000422	kaempferol	Carbonic anhydrase 12 (EC 4.2.1.1) (Carbonate dehydratase XII) (Carbonic anhydrase XII) (CA-XII) (Tumor antigen HOM-RCC-3.1.3)	CA12	O43570	771
Cuscutae Semen	MOL000422	kaempferol	Steroid hormone receptor ERR1 (Estrogen receptor-like 1) (Estrogen-related receptor alpha) (ERR-alpha) (Nuclear receptor subfamily 3 group B member 1)	ESRRA	P11474	2101
Cuscutae Semen	MOL000422	kaempferol	ATP-dependent translocase ABCB1 (ATP-binding cassette sub-family B member 1) (Multidrug resistance protein 1) (EC 7.6.2.2) (P-glycoprotein 1) (Phospholipid transporter ABCB1) (EC 7.6.2.1) (CD antigen CD243)	ABCB1	P08183	5243
Cuscutae Semen	MOL000422	kaempferol	Cytochrome P450 1B1 (EC 1.14.14.1) (CYPIB1) (Hydroperoxy icosatetraenoate dehydratase) (EC 4.2.1.152)	CYP1B1	Q16678	1545
Cuscutae Semen	MOL000422	kaempferol	Broad substrate specificity ATP-binding cassette transporter ABCG2 (EC 7.6.2.2) (ATP-binding cassette sub-family G member 2) (Breast cancer resistance protein) (CDw338) (Mitoxantrone resistance-associated protein) (Placenta-specific ATP-binding cassette transporter) (Urate exporter) (CD antigen CD338)	ABCG2	Q9UNQ0	9429
Cuscutae Semen	MOL000422	kaempferol	Adenosine receptor A1	ADORA1	P30542	134
Cuscutae Semen	MOL000422	kaempferol	Carbonic anhydrase 4 (EC 4.2.1.1) (Carbonate dehydratase IV) (Carbonic anhydrase IV) (CA-IV)	CA4	P22748	762
Cuscutae Semen	MOL000422	kaempferol	Acetylcholinesterase (AChE) (EC 3.1.1.7)	ACHE	P22303	43
Cuscutae Semen	MOL000422	kaempferol	Amine oxidase [flavin-containing] A (EC 1.4.3.4) (Monoamine oxidase type A) (MAO-A)	MAOA	P21397	4128
Cuscutae Semen	MOL000422	kaempferol	Lactoylglutathione lyase (EC 4.4.1.5) (Aldoketomutase) (Glyoxalase I) (Glx I) (Ketone-aldehyde mutase) (Methylglyoxalase) (S-D-lactoylglutathione methylglyoxal lyase)	GLO1	Q04760	2739
Cuscutae Semen	MOL000422	kaempferol	Tyrosine-protein kinase SYK (EC 2.7.10.2) (Spleen tyrosine kinase) (p72-Syk)	SYK	P43405	6850
Cuscutae Semen	MOL000422	kaempferol	Glycogen synthase kinase-3 beta (GSK-3 beta) (EC 2.7.11.26) (Serine/threonine-protein kinase GSK3B) (EC 2.7.11.1)	GSK3B	P49841	2932
Cuscutae Semen	MOL000422	kaempferol	Matrix metalloproteinase-9 (MMP-9) (EC 3.4.24.35) (92 kDa gelatinase) (92 kDa type IV collagenase) (Gelatinase B) (GELB) [Cleaved into: 67 kDa matrix metalloproteinase-9; 82 kDa matrix metalloproteinase-9]	MMP9	P14780	4318
Cuscutae Semen	MOL000422	kaempferol	72 kDa type IV collagenase (EC 3.4.24.24) (72 kDa gelatinase) (Gelatinase A) (Matrix metalloproteinase-2) (MMP-2) (TBE-1) [Cleaved into: PEX]	MMP2	P08253	4313
Cuscutae Semen	MOL000422	kaempferol	Polyunsaturated fatty acid lipoxygenase ALOX15 (12/15-lipoxygenase) (Arachidonate 12-lipoxygenase, leukocyte-type) (12-LOX) (EC 1.13.11.31) (Arachidonate 15-lipoxygenase) (15-LOX) (15-LOX-1) (EC 1.13.11.33) (Arachidonate omega-6 lipoxygenase) (Hepoxilin A3 synthase Alox15) (EC 1.13.11.-) (Linoleate 13S-lipoxygenase) (EC 1.13.11.12)	ALOX15	P16050	246
Cuscutae Semen	MOL000422	kaempferol	Polyunsaturated fatty acid lipoxygenase ALOX12 (EC 1.13.11.-) (Arachidonate (12S)-lipoxygenase) (12S-LOX) (12S-lipoxygenase) (EC 1.13.11.31) (Arachidonate (15S)-lipoxygenase) (EC 1.13.11.33) (Linoleate (13S)-lipoxygenase) (Lipoxin synthase 12-LO) (EC 3.3.2.-) (Platelet-type lipoxygenase 12)	ALOX12	P18054	239
Cuscutae Semen	MOL000422	kaempferol	Receptor-type tyrosine-protein phosphatase S (R-PTP-S) (EC 3.1.3.48) (Receptor-type tyrosine-protein phosphatase sigma) (R-PTP-sigma)	PTPRS	Q13332	5802
Cuscutae Semen	MOL000422	kaempferol	Adenosine receptor A2a	ADORA2A	P29274	135
Cuscutae Semen	MOL000422	kaempferol	Cyclin-dependent kinase 5 activator 1 (CDK5 activator 1) (Cyclin-dependent kinase 5 regulatory subunit 1) (TPKII regulatory subunit) [Cleaved into: Cyclin-dependent kinase 5 activator 1, p35 (p35); Cyclin-dependent kinase 5 activator 1, p25 (p25) (Tau protein kinase II 23 kDa subunit) (p23)]	CDK5R1	Q15078	8851
Cuscutae Semen	MOL000422	kaempferol	Cyclin-dependent-like kinase 5 (EC 2.7.11.1) (Cell division protein kinase 5) (Serine/threonine-protein kinase PSSALRE) (Tau protein kinase II catalytic subunit) (TPKII catalytic subunit)	CDK5	Q00535	1020
Cuscutae Semen	MOL000422	kaempferol	G2/mitotic-specific cyclin-B3	CCNB3	Q8WWL7	85417
Cuscutae Semen	MOL000422	kaempferol	Cyclin-dependent kinase 1 (CDK1) (EC 2.7.11.22) (EC 2.7.11.23) (Cell division control protein 2 homolog) (Cell division protein kinase 1) (p34 protein kinase)	CDK1	P06493	983
Cuscutae Semen	MOL000422	kaempferol	G2/mitotic-specific cyclin-B1	CCNB1	P14635	891
Cuscutae Semen	MOL000422	kaempferol	G2/mitotic-specific cyclin-B2	CCNB2	O95067	9133
Cuscutae Semen	MOL000422	kaempferol	Arginase-1 (EC 3.5.3.1) (Liver-type arginase) (Type I arginase)	ARG1	P05089	383
Cuscutae Semen	MOL000422	kaempferol	G-protein coupled receptor 35 (Kynurenic acid receptor) (KYNA receptor)	GPR35	Q9HC97	2859
Cuscutae Semen	MOL000422	kaempferol	Estrogen receptor beta (ER-beta) (Nuclear receptor subfamily 3 group A member 2)	ESR2	Q92731	2100
Cuscutae Semen	MOL000422	kaempferol	Death-associated protein kinase 1 (DAP kinase 1) (EC 2.7.11.1)	DAPK1	P53355	1612
Cuscutae Semen	MOL000422	kaempferol	DNA-3-methyladenine glycosylase (EC 3.2.2.21) (3-alkyladenine DNA glycosylase) (3-methyladenine DNA glycosidase) (ADPG) (N-methylpurine-DNA glycosylase)	MPG	P29372	4350
Cuscutae Semen	MOL000422	kaempferol	Solute carrier family 22 member 12 (Organic anion transporter 4-like protein) (Renal-specific transporter) (RST) (Urate anion exchanger 1)	SLC22A12	Q96S37	116085
Cuscutae Semen	MOL000422	kaempferol	Cyclin-dependent kinase 6 (EC 2.7.11.22) (Cell division protein kinase 6) (Serine/threonine-protein kinase PLSTIRE)	CDK6	Q00534	1021
Cuscutae Semen	MOL000422	kaempferol	Cyclin-dependent kinase 2 (EC 2.7.11.22) (Cell division protein kinase 2) (p33 protein kinase)	CDK2	P24941	1017
Cuscutae Semen	MOL000422	kaempferol	Transthyretin (ATTR) (Prealbumin) (TBPA)	TTR	P02766	7276
Cuscutae Semen	MOL000422	kaempferol	Aldo-keto reductase family 1 member B10 (EC 1.1.1.300) (EC 1.1.1.54) (ARL-1) (Aldose reductase-like) (Aldose reductase-related protein) (ARP) (hARP) (Small intestine reductase) (SI reductase)	AKR1B10	O60218	57016
Cuscutae Semen	MOL000422	kaempferol	Poly [ADP-ribose] polymerase tankyrase-2 (EC 2.4.2.30) (ADP-ribosyltransferase diphtheria toxin-like 6) (ARTD6) (Poly [ADP-ribose] polymerase 5B) (Protein poly-ADP-ribosyltransferase tankyrase-2) (EC 2.4.2.-) (TNKS-2) (TRF1-interacting ankyrin-related ADP-ribose polymerase 2) (Tankyrase II) (Tankyrase-2) (TANK2) (Tankyrase-like protein) (Tankyrase-related protein)	TNKS2	Q9H2K2	80351
Cuscutae Semen	MOL000422	kaempferol	Poly [ADP-ribose] polymerase tankyrase-1 (EC 2.4.2.30) (ADP-ribosyltransferase diphtheria toxin-like 5) (ARTD5) (Poly [ADP-ribose] polymerase 5A) (Protein poly-ADP-ribosyltransferase tankyrase-1) (EC 2.4.2.-) (TNKS-1) (TRF1-interacting ankyrin-related ADP-ribose polymerase) (Tankyrase I) (Tankyrase-1) (TANK1)	TNKS	O95271	8658
Cuscutae Semen	MOL000422	kaempferol	Aromatase (EC 1.14.14.14) (CYPXIX) (Cytochrome P-450AROM) (Cytochrome P450 19A1) (Estrogen synthase)	CYP19A1	P11511	1588
Cuscutae Semen	MOL000422	kaempferol	Casein kinase II subunit alpha (CK II alpha) (EC 2.7.11.1)	CSNK2A1	P68400	1457
Cuscutae Semen	MOL000422	kaempferol	Epidermal growth factor receptor (EC 2.7.10.1) (Proto-oncogene c-ErbB-1) (Receptor tyrosine-protein kinase erbB-1)	EGFR	P00533	1956
Cuscutae Semen	MOL000422	kaempferol	Vasopressin V2 receptor (V2R) (AVPR V2) (Antidiuretic hormone receptor) (Renal-type arginine vasopressin receptor)	AVPR2	P30518	554
Cuscutae Semen	MOL000422	kaempferol	Insulin-like growth factor 1 receptor (EC 2.7.10.1) (Insulin-like growth factor I receptor) (IGF-I receptor) (CD antigen CD221) [Cleaved into: Insulin-like growth factor 1 receptor alpha chain; Insulin-like growth factor 1 receptor beta chain]	IGF1R	P08069	3480
Cuscutae Semen	MOL000422	kaempferol	Prothrombin (EC 3.4.21.5) (Coagulation factor II) [Cleaved into: Activation peptide fragment 1; Activation peptide fragment 2; Thrombin light chain; Thrombin heavy chain]	F2	P00734	2147
Cuscutae Semen	MOL000422	kaempferol	Serine/threonine-protein kinase pim-1 (EC 2.7.11.1)	PIM1	P11309	5292
Cuscutae Semen	MOL000422	kaempferol	Aurora kinase B (EC 2.7.11.1) (Aurora 1) (Aurora- and IPL1-like midbody-associated protein 1) (AIM-1) (Aurora/IPL1-related kinase 2) (ARK-2) (Aurora-related kinase 2) (STK-1) (Serine/threonine-protein kinase 12) (Serine/threonine-protein kinase 5) (Serine/threonine-protein kinase aurora-B)	AURKB	Q96GD4	9212
Cuscutae Semen	MOL000422	kaempferol	D(4) dopamine receptor (D(2C) dopamine receptor) (Dopamine D4 receptor)	DRD4	P21917	1815
Cuscutae Semen	MOL000422	kaempferol	Myeloperoxidase (MPO) (EC 1.11.2.2) [Cleaved into: Myeloperoxidase; 89 kDa myeloperoxidase; 84 kDa myeloperoxidase; Myeloperoxidase light chain; Myeloperoxidase heavy chain]	MPO	P05164	4353
Cuscutae Semen	MOL000422	kaempferol	Phosphatidylinositol 3-kinase regulatory subunit alpha (PI3-kinase regulatory subunit alpha) (PI3K regulatory subunit alpha) (PtdIns-3-kinase regulatory subunit alpha) (Phosphatidylinositol 3-kinase 85 kDa regulatory subunit alpha) (PI3-kinase subunit p85-alpha) (PtdIns-3-kinase regulatory subunit p85-alpha)	PIK3R1	P27986	5295
Cuscutae Semen	MOL000422	kaempferol	Glycogen phosphorylase, liver form (EC 2.4.1.1)	PYGL	P06737	5836
Cuscutae Semen	MOL000422	kaempferol	Carbonic anhydrase 1 (EC 4.2.1.1) (Carbonate dehydratase I) (Carbonic anhydrase B) (CAB) (Carbonic anhydrase I) (CA-I)	CA1	P00915	759
Cuscutae Semen	MOL000422	kaempferol	Proto-oncogene tyrosine-protein kinase Src (EC 2.7.10.2) (Proto-oncogene c-Src) (pp60c-src) (p60-Src)	SRC	P12931	6714
Cuscutae Semen	MOL000422	kaempferol	Focal adhesion kinase 1 (FADK 1) (EC 2.7.10.2) (Focal adhesion kinase-related nonkinase) (FRNK) (Protein phosphatase 1 regulatory subunit 71) (PPP1R71) (Protein-tyrosine kinase 2) (p125FAK) (pp125FAK)	PTK2	Q05397	5747
Cuscutae Semen	MOL000422	kaempferol	Vascular endothelial growth factor receptor 2 (VEGFR-2) (EC 2.7.10.1) (Fetal liver kinase 1) (FLK-1) (Kinase insert domain receptor) (KDR) (Protein-tyrosine kinase receptor flk-1) (CD antigen CD309)	KDR	P35968	3791
Cuscutae Semen	MOL000422	kaempferol	Collagenase 3 (EC 3.4.24.-) (Matrix metalloproteinase-13) (MMP-13)	MMP13	P45452	4322
Cuscutae Semen	MOL000422	kaempferol	Stromelysin-1 (SL-1) (EC 3.4.24.17) (Matrix metalloproteinase-3) (MMP-3) (Transin-1)	MMP3	P08254	4314
Cuscutae Semen	MOL000422	kaempferol	Carbonic anhydrase 3 (EC 4.2.1.1) (Carbonate dehydratase III) (Carbonic anhydrase III) (CA-III)	CA3	P07451	761
Cuscutae Semen	MOL000422	kaempferol	Serine/threonine-protein kinase PLK1 (EC 2.7.11.21) (Polo-like kinase 1) (PLK-1) (Serine/threonine-protein kinase 13) (STPK13)	PLK1	P53350	5347
Cuscutae Semen	MOL000422	kaempferol	Carbonic anhydrase 6 (EC 4.2.1.1) (Carbonate dehydratase VI) (Carbonic anhydrase VI) (CA-VI) (Salivary carbonic anhydrase) (Secreted carbonic anhydrase)	CA6	P23280	765
Cuscutae Semen	MOL000422	kaempferol	Cyclin-dependent kinase 1 (CDK1) (EC 2.7.11.22) (EC 2.7.11.23) (Cell division control protein 2 homolog) (Cell division protein kinase 1) (p34 protein kinase)	CDK1	P06493	983
Cuscutae Semen	MOL000422	kaempferol	Serine/threonine-protein kinase N1 (EC 2.7.11.13) (Protease-activated kinase 1) (PAK-1) (Protein kinase C-like 1) (Protein kinase C-like PKN) (Protein kinase PKN-alpha) (Protein-kinase C-related kinase 1) (Serine-threonine protein kinase N)	PKN1	Q16512	5585
Cuscutae Semen	MOL000422	kaempferol	Carbonic anhydrase 14 (EC 4.2.1.1) (Carbonate dehydratase XIV) (Carbonic anhydrase XIV) (CA-XIV)	CA14	Q9ULX7	23632
Cuscutae Semen	MOL000422	kaempferol	Carbonic anhydrase 9 (EC 4.2.1.1) (Carbonate dehydratase IX) (Carbonic anhydrase IX) (CA-IX) (CAIX) (Membrane antigen MN) (P54/58N) (Renal cell carcinoma-associated antigen G250) (RCC-associated antigen G250) (pMW1)	CA9	Q16790	768
Cuscutae Semen	MOL000422	kaempferol	Hepatocyte growth factor receptor (HGF receptor) (EC 2.7.10.1) (HGF/SF receptor) (Proto-oncogene c-Met) (Scatter factor receptor) (SF receptor) (Tyrosine-protein kinase Met)	MET	P08581	4233
Cuscutae Semen	MOL000422	kaempferol	Serine/threonine-protein kinase Nek2 (EC 2.7.11.1) (HSPK 21) (Never in mitosis A-related kinase 2) (NimA-related protein kinase 2) (NimA-like protein kinase 1)	NEK2	P51955	4751
Cuscutae Semen	MOL000422	kaempferol	C-X-C chemokine receptor type 1 (CXC-R1) (CXCR-1) (CDw128a) (High affinity interleukin-8 receptor A) (IL-8R A) (IL-8 receptor type 1) (CD antigen CD181)	CXCR1	P25024	3577
Cuscutae Semen	MOL000422	kaempferol	Calcium/calmodulin-dependent protein kinase type II subunit beta (CaM kinase II subunit beta) (CaMK-II subunit beta) (EC 2.7.11.17)	CAMK2B	Q13554	816
Cuscutae Semen	MOL000422	kaempferol	ALK tyrosine kinase receptor (EC 2.7.10.1) (Anaplastic lymphoma kinase) (CD antigen CD246)	ALK	Q9UM73	238
Cuscutae Semen	MOL000422	kaempferol	RAC-alpha serine/threonine-protein kinase (EC 2.7.11.1) (Protein kinase B) (PKB) (Protein kinase B alpha) (PKB alpha) (Proto-oncogene c-Akt) (RAC-PK-alpha)	AKT1	P31749	207
Cuscutae Semen	MOL000422	kaempferol	Serine/threonine-protein kinase Nek6 (EC 2.7.11.1) (Never in mitosis A-related kinase 6) (NimA-related protein kinase 6) (Protein kinase SID6-1512)	NEK6	Q9HC98	10783
Cuscutae Semen	MOL000422	kaempferol	Phospholipase A2 (EC 3.1.1.4) (Group IB phospholipase A2) (Phosphatidylcholine 2-acylhydrolase 1B)	PLA2G1B	P04054	5319
Cuscutae Semen	MOL000422	kaempferol	Carbonic anhydrase 5A, mitochondrial (EC 4.2.1.1) (Carbonate dehydratase VA) (Carbonic anhydrase VA) (CA-VA)	CA5A	P35218	763
Cuscutae Semen	MOL000422	kaempferol	Beta-secretase 1 (EC 3.4.23.46) (Aspartyl protease 2) (ASP2) (Asp 2) (Beta-site amyloid precursor protein cleaving enzyme 1) (Beta-site APP cleaving enzyme 1) (Memapsin-2) (Membrane-associated aspartic protease 2)	BACE1	P56817	23621
Cuscutae Semen	MOL000422	kaempferol	Tyrosine-protein kinase receptor UFO (EC 2.7.10.1) (AXL oncogene)	AXL	P30530	558
Cuscutae Semen	MOL000422	kaempferol	NUAK family SNF1-like kinase 1 (EC 2.7.11.1) (AMPK-related protein kinase 5) (ARK5) (Omphalocele kinase 1)	NUAK1	O60285	9891
Cuscutae Semen	MOL000422	kaempferol	Aldo-keto reductase family 1 member C2 (EC 1.-.-.-) (3-alpha-HSD3) (Chlordecone reductase homolog HAKRD) (Dihydrodiol dehydrogenase 2) (DD-2) (DD2) (Dihydrodiol dehydrogenase/bile acid-binding protein) (DD/BABP) (Trans-1,2-dihydrobenzene-1,2-diol dehydrogenase) (EC 1.3.1.20) (Type III 3-alpha-hydroxysteroid dehydrogenase) (EC 1.1.1.357)	AKR1C2	P52895	1646
Cuscutae Semen	MOL000422	kaempferol	Aldo-keto reductase family 1 member C1 (EC 1.1.1.-) (20-alpha-hydroxysteroid dehydrogenase) (20-alpha-HSD) (EC 1.1.1.149) (Chlordecone reductase homolog HAKRC) (Dihydrodiol dehydrogenase 1/2) (DD1/DD2) (High-affinity hepatic bile acid-binding protein) (HBAB) (Indanol dehydrogenase) (EC 1.1.1.112) (Trans-1,2-dihydrobenzene-1,2-diol dehydrogenase) (EC 1.3.1.20)	AKR1C1	Q04828	1645
Cuscutae Semen	MOL000422	kaempferol	Aldo-keto reductase family 1 member C3 (EC 1.-.-.-) (17-beta-hydroxysteroid dehydrogenase type 5) (17-beta-HSD 5) (3-alpha-HSD type II, brain) (3-alpha-hydroxysteroid dehydrogenase type 2) (3-alpha-HSD type 2) (EC 1.1.1.357) (Chlordecone reductase homolog HAKRb) (Dihydrodiol dehydrogenase 3) (DD-3) (DD3) (Dihydrodiol dehydrogenase type I) (HA1753) (Indanol dehydrogenase) (EC 1.1.1.112) (Prostagla…	AKR1C3	P42330	8644
Cuscutae Semen	MOL000422	kaempferol	Aldo-keto reductase family 1 member C4 (EC 1.1.1.-) (3-alpha-HSD1) (3-alpha-hydroxysteroid dehydrogenase type I) (EC 1.1.1.357) (Chlordecone reductase) (CDR) (EC 1.1.1.225) (Dihydrodiol dehydrogenase 4) (DD-4) (DD4) (HAKRA)	AKR1C4	P17516	1109
Cuscutae Semen	MOL000422	kaempferol	Carbonic anhydrase 13 (EC 4.2.1.1) (Carbonate dehydratase XIII) (Carbonic anhydrase XIII) (CA-XIII)	CA13	Q8N1Q1	377677
Cuscutae Semen	MOL000422	kaempferol	Aldo-keto reductase family 1 member A1 (EC 1.1.1.2) (EC 1.1.1.372) (EC 1.1.1.54) (Alcohol dehydrogenase [NADP(+)]) (Aldehyde reductase) (Glucuronate reductase) (EC 1.1.1.19) (Glucuronolactone reductase) (EC 1.1.1.20)	AKR1A1	P14550	10327
Cuscutae Semen	MOL000422	kaempferol	Amyloid-beta precursor protein (APP) (ABPP) (APPI) (Alzheimer disease amyloid protein) (Amyloid precursor protein) (Amyloid-beta A4 protein) (Cerebral vascular amyloid peptide) (CVAP) (PreA4) (Protease nexin-II) (PN-II) [Cleaved into: N-APP; Soluble APP-alpha (S-APP-alpha); Soluble APP-beta (S-APP-beta); C99 (Beta-secretase C-terminal fragment) (Beta-CTF); Amyloid-beta protein 42 (Abeta42) (Beta-…	APP	P05067	351
Cuscutae Semen	MOL000422	kaempferol	Poly [ADP-ribose] polymerase 1 (PARP-1) (EC 2.4.2.30) (ADP-ribosyltransferase diphtheria toxin-like 1) (ARTD1) (DNA ADP-ribosyltransferase PARP1) (EC 2.4.2.-) (NAD(+) ADP-ribosyltransferase 1) (ADPRT 1) (Poly[ADP-ribose] synthase 1) (Protein poly-ADP-ribosyltransferase PARP1) (EC 2.4.2.-)	PARP1	P09874	142
Cuscutae Semen	MOL000422	kaempferol	Macrophage metalloelastase (MME) (EC 3.4.24.65) (Macrophage elastase) (ME) (hME) (Matrix metalloproteinase-12) (MMP-12)	MMP12	P39900	4321
Cuscutae Semen	MOL000422	kaempferol	ADP-ribosyl cyclase/cyclic ADP-ribose hydrolase 1 (EC 3.2.2.6) (2'-phospho-ADP-ribosyl cyclase) (2'-phospho-ADP-ribosyl cyclase/2'-phospho-cyclic-ADP-ribose transferase) (EC 2.4.99.20) (2'-phospho-cyclic-ADP-ribose transferase) (ADP-ribosyl cyclase 1) (ADPRC 1) (Cyclic ADP-ribose hydrolase 1) (cADPr hydrolase 1) (T10) (CD antigen CD38)	CD38	P28907	952
Cuscutae Semen	MOL000422	kaempferol	DNA topoisomerase 1 (EC 5.6.2.1) (DNA topoisomerase I)	TOP1	P11387	7150
Cuscutae Semen	MOL000422	kaempferol	Estrogen receptor (ER) (ER-alpha) (Estradiol receptor) (Nuclear receptor subfamily 3 group A member 1)	ESR1	P03372	2099
Cuscutae Semen	MOL000422	kaempferol	Prostaglandin G/H synthase 2 (EC 1.14.99.1) (Cyclooxygenase-2) (COX-2) (PHS II) (Prostaglandin H2 synthase 2) (PGH synthase 2) (PGHS-2) (Prostaglandin-endoperoxide synthase 2)	PTGS2	P35354	5743
Cuscutae Semen	MOL000422	kaempferol	Cystic fibrosis transmembrane conductance regulator (CFTR) (ATP-binding cassette sub-family C member 7) (Channel conductance-controlling ATPase) (EC 5.6.1.6) (cAMP-dependent chloride channel)	CFTR	P13569	1080
Cuscutae Semen	MOL000422	kaempferol	6-phosphofructo-2-kinase/fructose-2,6-bisphosphatase 3 (6PF-2-K/Fru-2,6-P2ase 3) (PFK/FBPase 3) (6PF-2-K/Fru-2,6-P2ase brain/placenta-type isozyme) (Renal carcinoma antigen NY-REN-56) (iPFK-2) [Includes: 6-phosphofructo-2-kinase (EC 2.7.1.105); Fructose-2,6-bisphosphatase (EC 3.1.3.46)]	PFKFB3	Q16875	5209
Cuscutae Semen	MOL000422	kaempferol	Alpha-amylase 1 (EC 3.2.1.1) (1,4-alpha-D-glucan glucanohydrolase 1) (Salivary alpha-amylase)	AMY1A	P04745	276,277,278
Cuscutae Semen	MOL000422	kaempferol	G protein-coupled receptor kinase 6 (EC 2.7.11.16) (G protein-coupled receptor kinase GRK6)	GRK6	P43250	2870
Cuscutae Semen	MOL000422	kaempferol	Telomerase reverse transcriptase (EC 2.7.7.49) (HEST2) (Telomerase catalytic subunit) (Telomerase-associated protein 2) (TP2)	TERT	O14746	7015
Cuscutae Semen	MOL000422	kaempferol	Cholinesterase (EC 3.1.1.8) (Acylcholine acylhydrolase) (Butyrylcholine esterase) (Choline esterase II) (Pseudocholinesterase)	BCHE	P06276	590
Cuscutae Semen	MOL000358	beta-sitosterol	Androgen receptor (Dihydrotestosterone receptor) (Nuclear receptor subfamily 3 group C member 4)	AR	P10275	367
Cuscutae Semen	MOL000358	beta-sitosterol	3-hydroxy-3-methylglutaryl-coenzyme A reductase (HMG-CoA reductase) (EC 1.1.1.34)	HMGCR	P04035	3156
Cuscutae Semen	MOL000358	beta-sitosterol	Lanosterol 14-alpha demethylase (LDM) (EC 1.14.14.154) (CYPLI) (Cytochrome P450 51A1) (Cytochrome P450-14DM) (Cytochrome P45014DM) (Cytochrome P450LI) (Sterol 14-alpha demethylase)	CYP51A1	Q16850	1595
Cuscutae Semen	MOL000358	beta-sitosterol	NPC1-like intracellular cholesterol transporter 1 (Niemann-Pick C1-like protein 1)	NPC1L1	Q9UHC9	29881
Cuscutae Semen	MOL000358	beta-sitosterol	Oxysterols receptor LXR-alpha (Liver X receptor alpha) (Nuclear receptor subfamily 1 group H member 3)	NR1H3	Q13133	10062
Cuscutae Semen	MOL000358	beta-sitosterol	Aromatase (EC 1.14.14.14) (CYPXIX) (Cytochrome P-450AROM) (Cytochrome P450 19A1) (Estrogen synthase)	CYP19A1	P11511	1588
Cuscutae Semen	MOL000358	beta-sitosterol	Steroid 17-alpha-hydroxylase/17,20 lyase (EC 1.14.14.19) (17-alpha-hydroxyprogesterone aldolase) (EC 1.14.14.32) (CYPXVII) (Cytochrome P450 17A1) (Cytochrome P450-C17) (Cytochrome P450c17) (Steroid 17-alpha-monooxygenase)	CYP17A1	P05093	1586
Cuscutae Semen	MOL000358	beta-sitosterol	Nuclear receptor ROR-gamma (Nuclear receptor RZR-gamma) (Nuclear receptor subfamily 1 group F member 3) (RAR-related orphan receptor C) (Retinoid-related orphan receptor-gamma)	RORC	P51449	6097
Cuscutae Semen	MOL000358	beta-sitosterol	Estrogen receptor (ER) (ER-alpha) (Estradiol receptor) (Nuclear receptor subfamily 3 group A member 1)	ESR1	P03372	2099
Cuscutae Semen	MOL000358	beta-sitosterol	Estrogen receptor beta (ER-beta) (Nuclear receptor subfamily 3 group A member 2)	ESR2	Q92731	2100
Cuscutae Semen	MOL000358	beta-sitosterol	Sterol regulatory element-binding protein 2 (SREBP-2) (Class D basic helix-loop-helix protein 2) (bHLHd2) (Sterol regulatory element-binding transcription factor 2) [Cleaved into: Processed sterol regulatory element-binding protein 2]	SREBF2	Q12772	6721
Cuscutae Semen	MOL000358	beta-sitosterol	Sex hormone-binding globulin (SHBG) (Sex steroid-binding protein) (SBP) (Testis-specific androgen-binding protein) (ABP) (Testosterone-estradiol-binding globulin) (TeBG) (Testosterone-estrogen-binding globulin)	SHBG	P04278	6462
Cuscutae Semen	MOL000358	beta-sitosterol	Sodium-dependent noradrenaline transporter (Norepinephrine transporter) (NET) (Solute carrier family 6 member 2)	SLC6A2	P23975	6530
Cuscutae Semen	MOL000358	beta-sitosterol	Cytochrome P450 2C19 (EC 1.14.14.1) ((R)-limonene 6-monooxygenase) (EC 1.14.14.53) ((S)-limonene 6-monooxygenase) (EC 1.14.14.51) ((S)-limonene 7-monooxygenase) (EC 1.14.14.52) (CYPIIC17) (CYPIIC19) (Cytochrome P450-11A) (Cytochrome P450-254C) (Fenbendazole monooxygenase (4'-hydroxylating)) (EC 1.14.14.75) (Mephenytoin 4-hydroxylase)	CYP2C19	P33261	1557
Cuscutae Semen	MOL000358	beta-sitosterol	Nuclear receptor ROR-alpha (Nuclear receptor RZR-alpha) (Nuclear receptor subfamily 1 group F member 1) (RAR-related orphan receptor A) (Retinoid-related orphan receptor-alpha)	RORA	P35398	6095
Cuscutae Semen	MOL000358	beta-sitosterol	Tyrosine-protein phosphatase non-receptor type 1 (EC 3.1.3.48) (Protein-tyrosine phosphatase 1B) (PTP-1B)	PTPN1	P18031	5770
Cuscutae Semen	MOL000358	beta-sitosterol	Cholinesterase (EC 3.1.1.8) (Acylcholine acylhydrolase) (Butyrylcholine esterase) (Choline esterase II) (Pseudocholinesterase)	BCHE	P06276	590
Cuscutae Semen	MOL000358	beta-sitosterol	Corticosteroid-binding globulin (CBG) (Serpin A6) (Transcortin)	SERPINA6	P08185	866
Cuscutae Semen	MOL000358	beta-sitosterol	Sodium-dependent serotonin transporter (SERT) (5HT transporter) (5HTT) (Solute carrier family 6 member 4)	SLC6A4	P31645	6532
Cuscutae Semen	MOL000358	beta-sitosterol	Muscarinic acetylcholine receptor M2	CHRM2	P08172	1129
Cuscutae Semen	MOL000358	beta-sitosterol	Vitamin D3 receptor (VDR) (1,25-dihydroxyvitamin D3 receptor) (Nuclear receptor subfamily 1 group I member 1)	VDR	P11473	7421
Cuscutae Semen	MOL000358	beta-sitosterol	Acetylcholinesterase (AChE) (EC 3.1.1.7)	ACHE	P22303	43
Cuscutae Semen	MOL000358	beta-sitosterol	Glucose-6-phosphate 1-dehydrogenase (G6PD) (EC 1.1.1.49)	G6PD	P11413	2539
Cuscutae Semen	MOL000358	beta-sitosterol	Oxysterols receptor LXR-beta (Liver X receptor beta) (Nuclear receptor NER) (Nuclear receptor subfamily 1 group H member 2) (Ubiquitously-expressed nuclear receptor)	NR1H2	P55055	7376
Cuscutae Semen	MOL000358	beta-sitosterol	Glycine receptor subunit alpha-1 (Glycine receptor 48 kDa subunit) (Glycine receptor strychnine-binding subunit)	GLRA1	P23415	2741
Cuscutae Semen	MOL000358	beta-sitosterol	Cocaine esterase (EC 3.1.1.84) (Carboxylesterase 2) (CE-2) (hCE-2) (EC 3.1.1.1) (Methylumbelliferyl-acetate deacetylase 2) (EC 3.1.1.56)	CES2	O00748	8824
Cuscutae Semen	MOL000358	beta-sitosterol	Prostaglandin E2 receptor EP1 subtype (PGE receptor EP1 subtype) (PGE2 receptor EP1 subtype) (Prostanoid EP1 receptor)	PTGER1	P34995	5731
Cuscutae Semen	MOL000358	beta-sitosterol	Prostaglandin E2 receptor EP2 subtype (PGE receptor EP2 subtype) (PGE2 receptor EP2 subtype) (Prostanoid EP2 receptor)	PTGER2	P43116	5732
Cuscutae Semen	MOL000358	beta-sitosterol	Corticosteroid 11-beta-dehydrogenase isozyme 1 (EC 1.1.1.146) (11-beta-hydroxysteroid dehydrogenase 1) (11-DH) (11-beta-HSD1) (Short chain dehydrogenase/reductase family 26C member 1)	HSD11B1	P28845	3290
Cuscutae Semen	MOL000358	beta-sitosterol	Prostaglandin E synthase (EC 5.3.99.3) (Microsomal glutathione S-transferase 1-like 1) (MGST1-L1) (Microsomal prostaglandin E synthase 1) (MPGES-1) (p53-induced gene 12 protein)	PTGES	O14684	9536
Cuscutae Semen	MOL000358	beta-sitosterol	M-phase inducer phosphatase 1 (EC 3.1.3.48) (Dual specificity phosphatase Cdc25A)	CDC25A	P30304	993
Cuscutae Semen	MOL000358	beta-sitosterol	Peroxisome proliferator-activated receptor alpha (PPAR-alpha) (Nuclear receptor subfamily 1 group C member 1)	PPARA	Q07869	5465
Cuscutae Semen	MOL000358	beta-sitosterol	Peroxisome proliferator-activated receptor delta (PPAR-delta) (NUCI) (Nuclear hormone receptor 1) (NUC1) (Nuclear receptor subfamily 1 group C member 2) (Peroxisome proliferator-activated receptor beta) (PPAR-beta)	PPARD	Q03181	5467
Cuscutae Semen	MOL000358	beta-sitosterol	7-dehydrocholesterol reductase (7-DHC reductase) (EC 1.3.1.21) (Delta7-sterol reductase) (Sterol Delta(7)-reductase) (Sterol reductase SR-2)	DHCR7	Q9UBM7	1717
Cuscutae Semen	MOL000358	beta-sitosterol	Squalene monooxygenase (EC 1.14.14.17) (Squalene epoxidase) (SE)	SQLE	Q14534	6713
Cuscutae Semen	MOL000358	beta-sitosterol	Tyrosine-protein phosphatase non-receptor type 6 (EC 3.1.3.48) (Hematopoietic cell protein-tyrosine phosphatase) (Protein-tyrosine phosphatase 1C) (PTP-1C) (Protein-tyrosine phosphatase SHP-1) (SH-PTP1)	PTPN6	P29350	5777
Cuscutae Semen	MOL000358	beta-sitosterol	Nuclear receptor subfamily 1 group I member 3 (Constitutive activator of retinoid response) (Constitutive active response) (Constitutive androstane receptor) (CAR) (Orphan nuclear receptor MB67)	NR1I3	Q14994	9970
Cuscutae Semen	MOL000358	beta-sitosterol	Squalene synthase (SQS) (SS) (EC 2.5.1.21) (FPP:FPP farnesyltransferase) (Farnesyl-diphosphate farnesyltransferase) (Farnesyl-diphosphate farnesyltransferase 1)	FDFT1	P37268	2222
Cuscutae Semen	MOL000358	beta-sitosterol	Sigma non-opioid intracellular receptor 1 (Aging-associated gene 8 protein) (SR31747-binding protein) (SR-BP) (Sigma 1-type opioid receptor) (SIG-1R) (Sigma1-receptor) (Sigma1R) (hSigmaR1)	SIGMAR1	Q99720	10280
Cuscutae Semen	MOL000358	beta-sitosterol	Nitric oxide synthase, inducible (EC 1.14.13.39) (Hepatocyte NOS) (HEP-NOS) (Inducible NO synthase) (Inducible NOS) (iNOS) (NOS type II) (Peptidyl-cysteine S-nitrosylase NOS2)	NOS2	P35228	4843
Cuscutae Semen	MOL000358	beta-sitosterol	Glucocorticoid receptor (GR) (Nuclear receptor subfamily 3 group C member 1)	NR3C1	P04150	2908
Cuscutae Semen	MOL000358	beta-sitosterol	Peroxisome proliferator-activated receptor gamma (PPAR-gamma) (Nuclear receptor subfamily 1 group C member 3)	PPARG	P37231	5468
Cuscutae Semen	MOL000358	beta-sitosterol	M-phase inducer phosphatase 2 (EC 3.1.3.48) (Dual specificity phosphatase Cdc25B)	CDC25B	P30305	994
Cuscutae Semen	MOL000358	beta-sitosterol	UDP-glucuronosyltransferase 2B7 (UDPGT 2B7) (EC 2.4.1.17) (3,4-catechol estrogen-specific UDPGT) (UDP-glucuronosyltransferase 2B9) (UDPGT 2B9) (UDPGTh-2)	UGT2B7	P16662	7364
Cuscutae Semen	MOL000358	beta-sitosterol	Corticosteroid 11-beta-dehydrogenase isozyme 2 (EC 1.1.1.-) (11-beta-hydroxysteroid dehydrogenase type 2) (11-DH2) (11-beta-HSD2) (11-beta-hydroxysteroid dehydrogenase type II) (11-HSD type II) (11-beta-HSD type II) (NAD-dependent 11-beta-hydroxysteroid dehydrogenase) (11-beta-HSD) (Short chain dehydrogenase/reductase family 9C member 3)	HSD11B2	P80365	3291
Cuscutae Semen	MOL000358	beta-sitosterol	DNA polymerase beta (EC 2.7.7.7) (EC 4.2.99.-)	POLB	P06746	5423
Cuscutae Semen	MOL000184	NSC63551	Aromatase (EC 1.14.14.14) (CYPXIX) (Cytochrome P-450AROM) (Cytochrome P450 19A1) (Estrogen synthase)	CYP19A1	P11511	1588
Cuscutae Semen	MOL000184	NSC63551	Cathepsin D (EC 3.4.23.5) [Cleaved into: Cathepsin D light chain; Cathepsin D heavy chain]	CTSD	P07339	1509
Cuscutae Semen	MOL000184	NSC63551	Fatty-acid amide hydrolase 1 (EC 3.5.1.99) (Anandamide amidohydrolase 1) (Fatty acid ester hydrolase) (EC 3.1.1.-) (Oleamide hydrolase 1)	FAAH	O00519	2166
Cuscutae Semen	MOL000184	NSC63551	Transient receptor potential cation channel subfamily V member 1 (TrpV1) (Capsaicin receptor) (Osm-9-like TRP channel 1) (OTRPC1) (Vanilloid receptor 1)	TRPV1	Q8NER1	7442
Cuscutae Semen	MOL000184	NSC63551	3-oxo-5-alpha-steroid 4-dehydrogenase 1 (EC 1.3.1.22) (SR type 1) (Steroid 5-alpha-reductase 1) (S5AR 1)	SRD5A1	P18405	6715
Cuscutae Semen	MOL000184	NSC63551	3-oxo-5-alpha-steroid 4-dehydrogenase 2 (EC 1.3.1.22) (5 alpha-SR2) (SR type 2) (Steroid 5-alpha-reductase 2) (S5AR 2) (Type II 5-alpha reductase)	SRD5A2	P31213	6716
Cuscutae Semen	MOL000184	NSC63551	Prostaglandin G/H synthase 1 (EC 1.14.99.1) (Cyclooxygenase-1) (COX-1) (Prostaglandin H2 synthase 1) (PGH synthase 1) (PGHS-1) (PHS 1) (Prostaglandin-endoperoxide synthase 1)	PTGS1	P23219	5742
Cuscutae Semen	MOL000184	NSC63551	Sex hormone-binding globulin (SHBG) (Sex steroid-binding protein) (SBP) (Testis-specific androgen-binding protein) (ABP) (Testosterone-estradiol-binding globulin) (TeBG) (Testosterone-estrogen-binding globulin)	SHBG	P04278	6462
Cuscutae Semen	MOL000184	NSC63551	Fatty acid-binding protein, liver (Fatty acid-binding protein 1) (Liver-type fatty acid-binding protein) (L-FABP)	FABP1	P07148	2168
Cuscutae Semen	MOL000184	NSC63551	Glucocorticoid receptor (GR) (Nuclear receptor subfamily 3 group C member 1)	NR3C1	P04150	2908
Cuscutae Semen	MOL000184	NSC63551	Steroid 17-alpha-hydroxylase/17,20 lyase (EC 1.14.14.19) (17-alpha-hydroxyprogesterone aldolase) (EC 1.14.14.32) (CYPXVII) (Cytochrome P450 17A1) (Cytochrome P450-C17) (Cytochrome P450c17) (Steroid 17-alpha-monooxygenase)	CYP17A1	P05093	1586
Cuscutae Semen	MOL000184	NSC63551	Progesterone receptor (PR) (Nuclear receptor subfamily 3 group C member 3)	PGR	P06401	5241
Cuscutae Semen	MOL000184	NSC63551	Androgen receptor (Dihydrotestosterone receptor) (Nuclear receptor subfamily 3 group C member 4)	AR	P10275	367
Cuscutae Semen	MOL000184	NSC63551	Tyrosine-protein phosphatase non-receptor type 1 (EC 3.1.3.48) (Protein-tyrosine phosphatase 1B) (PTP-1B)	PTPN1	P18031	5770
Cuscutae Semen	MOL000184	NSC63551	C-C chemokine receptor type 5 (C-C CKR-5) (CC-CKR-5) (CCR-5) (CCR5) (CHEMR13) (HIV-1 fusion coreceptor) (CD antigen CD195)	CCR5	P51681	1234
Cuscutae Semen	MOL000184	NSC63551	Nuclear receptor subfamily 1 group I member 2 (Orphan nuclear receptor PAR1) (Orphan nuclear receptor PXR) (Pregnane X receptor) (Steroid and xenobiotic receptor) (SXR)	NR1I2	O75469	8856
Cuscutae Semen	MOL000184	NSC63551	Nuclear receptor subfamily 1 group I member 3 (Constitutive activator of retinoid response) (Constitutive active response) (Constitutive androstane receptor) (CAR) (Orphan nuclear receptor MB67)	NR1I3	Q14994	9970
Cuscutae Semen	MOL000184	NSC63551	Mineralocorticoid receptor (MR) (Nuclear receptor subfamily 3 group C member 2)	NR3C2	P08235	4306
Cuscutae Semen	MOL000184	NSC63551	Testosterone 17-beta-dehydrogenase 3 (EC 1.1.1.64) (17-beta-hydroxysteroid dehydrogenase type 3) (17-beta-HSD 3) (Short chain dehydrogenase/reductase family 12C member 2) (Testicular 17-beta-hydroxysteroid dehydrogenase)	HSD17B3	P37058	3293
Cuscutae Semen	MOL000184	NSC63551	Tyrosine-protein phosphatase non-receptor type 6 (EC 3.1.3.48) (Hematopoietic cell protein-tyrosine phosphatase) (Protein-tyrosine phosphatase 1C) (PTP-1C) (Protein-tyrosine phosphatase SHP-1) (SH-PTP1)	PTPN6	P29350	5777
Cuscutae Semen	MOL000184	NSC63551	Tyrosine-protein phosphatase non-receptor type 2 (EC 3.1.3.48) (T-cell protein-tyrosine phosphatase) (TCPTP)	PTPN2	P17706	5771
Cuscutae Semen	MOL000184	NSC63551	Cannabinoid receptor 1 (CB-R) (CB1) (CANN6)	CNR1	P21554	1268
Cuscutae Semen	MOL000184	NSC63551	Fatty acid-binding protein, adipocyte (Adipocyte lipid-binding protein) (ALBP) (Adipocyte-type fatty acid-binding protein) (A-FABP) (AFABP) (Fatty acid-binding protein 4)	FABP4	P15090	2167
Cuscutae Semen	MOL000184	NSC63551	Fatty acid-binding protein, heart (Fatty acid-binding protein 3) (Heart-type fatty acid-binding protein) (H-FABP) (Mammary-derived growth inhibitor) (MDGI) (Muscle fatty acid-binding protein) (M-FABP)	FABP3	P05413	2170
Cuscutae Semen	MOL000184	NSC63551	Fatty acid-binding protein 5 (Epidermal-type fatty acid-binding protein) (E-FABP) (Fatty acid-binding protein, epidermal) (Psoriasis-associated fatty acid-binding protein homolog) (PA-FABP)	FABP5	Q01469	2171
Cuscutae Semen	MOL000184	NSC63551	Corticosteroid-binding globulin (CBG) (Serpin A6) (Transcortin)	SERPINA6	P08185	866
Cuscutae Semen	MOL000184	NSC63551	Sigma non-opioid intracellular receptor 1 (Aging-associated gene 8 protein) (SR31747-binding protein) (SR-BP) (Sigma 1-type opioid receptor) (SIG-1R) (Sigma1-receptor) (Sigma1R) (hSigmaR1)	SIGMAR1	Q99720	10280
Cuscutae Semen	MOL000184	NSC63551	Peroxisome proliferator-activated receptor gamma (PPAR-gamma) (Nuclear receptor subfamily 1 group C member 3)	PPARG	P37231	5468
Cuscutae Semen	MOL000184	NSC63551	Peroxisome proliferator-activated receptor alpha (PPAR-alpha) (Nuclear receptor subfamily 1 group C member 1)	PPARA	Q07869	5465
Cuscutae Semen	MOL000184	NSC63551	Transient receptor potential cation channel subfamily A member 1 (Ankyrin-like with transmembrane domains protein 1) (Transformation-sensitive protein p120) (Wasabi receptor)	TRPA1	O75762	8989
Cuscutae Semen	MOL000184	NSC63551	3-hydroxy-3-methylglutaryl-coenzyme A reductase (HMG-CoA reductase) (EC 1.1.1.34)	HMGCR	P04035	3156
Cuscutae Semen	MOL000184	NSC63551	Lanosterol 14-alpha demethylase (LDM) (EC 1.14.14.154) (CYPLI) (Cytochrome P450 51A1) (Cytochrome P450-14DM) (Cytochrome P45014DM) (Cytochrome P450LI) (Sterol 14-alpha demethylase)	CYP51A1	Q16850	1595
Cuscutae Semen	MOL000184	NSC63551	Corticosteroid 11-beta-dehydrogenase isozyme 1 (EC 1.1.1.146) (11-beta-hydroxysteroid dehydrogenase 1) (11-DH) (11-beta-HSD1) (Short chain dehydrogenase/reductase family 26C member 1)	HSD11B1	P28845	3290
Cuscutae Semen	MOL000184	NSC63551	Prostaglandin E synthase (EC 5.3.99.3) (Microsomal glutathione S-transferase 1-like 1) (MGST1-L1) (Microsomal prostaglandin E synthase 1) (MPGES-1) (p53-induced gene 12 protein)	PTGES	O14684	9536
Cuscutae Semen	MOL000184	NSC63551	NPC1-like intracellular cholesterol transporter 1 (Niemann-Pick C1-like protein 1)	NPC1L1	Q9UHC9	29881
Cuscutae Semen	MOL000184	NSC63551	Protein farnesyltransferase/geranylgeranyltransferase type-1 subunit alpha (EC 2.5.1.58) (EC 2.5.1.59) (CAAX farnesyltransferase subunit alpha) (FTase-alpha) (Ras proteins prenyltransferase subunit alpha) (Type I protein geranyl-geranyltransferase subunit alpha) (GGTase-I-alpha)	FNTA	P49354	2339
Cuscutae Semen	MOL000184	NSC63551	Protein farnesyltransferase subunit beta (FTase-beta) (EC 2.5.1.58) (CAAX farnesyltransferase subunit beta) (Ras proteins prenyltransferase subunit beta)	FNTB	P49356	100529261,2342
Cuscutae Semen	MOL000184	NSC63551	Glucose-6-phosphate 1-dehydrogenase (G6PD) (EC 1.1.1.49)	G6PD	P11413	2539
Cuscutae Semen	MOL000184	NSC63551	Oxysterols receptor LXR-alpha (Liver X receptor alpha) (Nuclear receptor subfamily 1 group H member 3)	NR1H3	Q13133	10062
Cuscutae Semen	MOL000184	NSC63551	3 beta-hydroxysteroid dehydrogenase/Delta 5-->4-isomerase type 1 (3 beta-hydroxysteroid dehydrogenase/Delta 5-->4-isomerase type I) (3-beta-HSD I) (3-beta-hydroxy-5-ene steroid dehydrogenase) (3-beta-hydroxy-Delta(5)-steroid dehydrogenase) (EC 1.1.1.145) (3-beta-hydroxysteroid 3-dehydrogenase) (EC 1.1.1.270) (Delta-5-3-ketosteroid isomerase) (Dihydrotestosterone oxidoreductase) (EC 1.1.1.210) (St…	HSD3B1	P14060	3283
Cuscutae Semen	MOL000184	NSC63551	Cocaine esterase (EC 3.1.1.84) (Carboxylesterase 2) (CE-2) (hCE-2) (EC 3.1.1.1) (Methylumbelliferyl-acetate deacetylase 2) (EC 3.1.1.56)	CES2	O00748	8824
Cuscutae Semen	MOL000184	NSC63551	Mitogen-activated protein kinase 3 (MAP kinase 3) (MAPK 3) (EC 2.7.11.24) (ERT2) (Extracellular signal-regulated kinase 1) (ERK-1) (Insulin-stimulated MAP2 kinase) (MAP kinase isoform p44) (p44-MAPK) (Microtubule-associated protein 2 kinase) (p44-ERK1)	MAPK3	P27361	5595
Cuscutae Semen	MOL000184	NSC63551	Acyl-CoA desaturase (EC 1.14.19.1) (Delta(9)-desaturase) (Delta-9 desaturase) (Fatty acid desaturase) (Stearoyl-CoA desaturase) (hSCD1)	SCD	O00767	6319
Cuscutae Semen	MOL000184	NSC63551	3-keto-steroid reductase (EC 1.1.1.270) (17-beta-hydroxysteroid dehydrogenase 7) (17-beta-HSD 7) (Estradiol 17-beta-dehydrogenase 7) (EC 1.1.1.62) (Short chain dehydrogenase/reductase family 37C member 1)	HSD17B7	P56937	51478
Cuscutae Semen	MOL000184	NSC63551	DNA polymerase beta (EC 2.7.7.7) (EC 4.2.99.-)	POLB	P06746	5423
Cuscutae Semen	MOL000184	NSC63551	Receptor-type tyrosine-protein phosphatase F (EC 3.1.3.48) (Leukocyte common antigen related) (LAR)	PTPRF	P10586	5792
Cuscutae Semen	MOL000184	NSC63551	Phospholipase A2 (EC 3.1.1.4) (Group IB phospholipase A2) (Phosphatidylcholine 2-acylhydrolase 1B)	PLA2G1B	P04054	5319
Cuscutae Semen	MOL000184	NSC63551	Low molecular weight phosphotyrosine protein phosphatase (LMW-PTP) (LMW-PTPase) (EC 3.1.3.48) (Adipocyte acid phosphatase) (Low molecular weight cytosolic acid phosphatase) (EC 3.1.3.2) (Red cell acid phosphatase 1)	ACP1	P24666	52
Cuscutae Semen	MOL000184	NSC63551	Aldo-keto reductase family 1 member B10 (EC 1.1.1.300) (EC 1.1.1.54) (ARL-1) (Aldose reductase-like) (Aldose reductase-related protein) (ARP) (hARP) (Small intestine reductase) (SI reductase)	AKR1B10	O60218	57016
Cuscutae Semen	MOL000184	NSC63551	Telomerase reverse transcriptase (EC 2.7.7.49) (HEST2) (Telomerase catalytic subunit) (Telomerase-associated protein 2) (TP2)	TERT	O14746	7015
Cuscutae Semen	MOL000184	NSC63551	Corticotropin-releasing factor receptor 1 (CRF-R-1) (CRF-R1) (CRFR-1) (Corticotropin-releasing hormone receptor 1) (CRH-R-1) (CRH-R1)	CRHR1	P34998	104909134,1394
Cuscutae Semen	MOL000354	isorhamnetin	Xanthine dehydrogenase/oxidase [Includes: Xanthine dehydrogenase (XD) (EC 1.17.1.4); Xanthine oxidase (XO) (EC 1.17.3.2) (Xanthine oxidoreductase) (XOR)]	XDH	P47989	7498
Cuscutae Semen	MOL000354	isorhamnetin	Carbonic anhydrase 2 (EC 4.2.1.1) (Carbonate dehydratase II) (Carbonic anhydrase C) (CAC) (Carbonic anhydrase II) (CA-II)	CA2	P00918	760
Cuscutae Semen	MOL000354	isorhamnetin	Carbonic anhydrase 7 (EC 4.2.1.1) (Carbonate dehydratase VII) (Carbonic anhydrase VII) (CA-VII)	CA7	P43166	766
Cuscutae Semen	MOL000354	isorhamnetin	Carbonic anhydrase 12 (EC 4.2.1.1) (Carbonate dehydratase XII) (Carbonic anhydrase XII) (CA-XII) (Tumor antigen HOM-RCC-3.1.3)	CA12	O43570	771
Cuscutae Semen	MOL000354	isorhamnetin	Carbonic anhydrase 4 (EC 4.2.1.1) (Carbonate dehydratase IV) (Carbonic anhydrase IV) (CA-IV)	CA4	P22748	762
Cuscutae Semen	MOL000354	isorhamnetin	Cytochrome P450 1B1 (EC 1.14.14.1) (CYPIB1) (Hydroperoxy icosatetraenoate dehydratase) (EC 4.2.1.152)	CYP1B1	Q16678	1545
Cuscutae Semen	MOL000354	isorhamnetin	Multidrug resistance-associated protein 1 (EC 7.6.2.2) (ATP-binding cassette sub-family C member 1) (Glutathione-S-conjugate-translocating ATPase ABCC1) (EC 7.6.2.3) (Leukotriene C(4) transporter) (LTC4 transporter)	ABCC1	P33527	4363
Cuscutae Semen	MOL000354	isorhamnetin	NADPH oxidase 4 (EC 1.6.3.-) (Kidney oxidase-1) (KOX-1) (Kidney superoxide-producing NADPH oxidase) (Renal NAD(P)H-oxidase)	NOX4	Q9NPH5	50507
Cuscutae Semen	MOL000354	isorhamnetin	Aldo-keto reductase family 1 member B1 (EC 1.1.1.300) (EC 1.1.1.372) (EC 1.1.1.54) (Aldehyde reductase) (Aldose reductase) (AR) (EC 1.1.1.21)	AKR1B1	P15121	231
Cuscutae Semen	MOL000354	isorhamnetin	Broad substrate specificity ATP-binding cassette transporter ABCG2 (EC 7.6.2.2) (ATP-binding cassette sub-family G member 2) (Breast cancer resistance protein) (CDw338) (Mitoxantrone resistance-associated protein) (Placenta-specific ATP-binding cassette transporter) (Urate exporter) (CD antigen CD338)	ABCG2	Q9UNQ0	9429
Cuscutae Semen	MOL000354	isorhamnetin	Insulin-like growth factor 1 receptor (EC 2.7.10.1) (Insulin-like growth factor I receptor) (IGF-I receptor) (CD antigen CD221) [Cleaved into: Insulin-like growth factor 1 receptor alpha chain; Insulin-like growth factor 1 receptor beta chain]	IGF1R	P08069	3480
Cuscutae Semen	MOL000354	isorhamnetin	Epidermal growth factor receptor (EC 2.7.10.1) (Proto-oncogene c-ErbB-1) (Receptor tyrosine-protein kinase erbB-1)	EGFR	P00533	1956
Cuscutae Semen	MOL000354	isorhamnetin	Acetylcholinesterase (AChE) (EC 3.1.1.7)	ACHE	P22303	43
Cuscutae Semen	MOL000354	isorhamnetin	Polyunsaturated fatty acid lipoxygenase ALOX15 (12/15-lipoxygenase) (Arachidonate 12-lipoxygenase, leukocyte-type) (12-LOX) (EC 1.13.11.31) (Arachidonate 15-lipoxygenase) (15-LOX) (15-LOX-1) (EC 1.13.11.33) (Arachidonate omega-6 lipoxygenase) (Hepoxilin A3 synthase Alox15) (EC 1.13.11.-) (Linoleate 13S-lipoxygenase) (EC 1.13.11.12)	ALOX15	P16050	246
Cuscutae Semen	MOL000354	isorhamnetin	Polyunsaturated fatty acid lipoxygenase ALOX12 (EC 1.13.11.-) (Arachidonate (12S)-lipoxygenase) (12S-LOX) (12S-lipoxygenase) (EC 1.13.11.31) (Arachidonate (15S)-lipoxygenase) (EC 1.13.11.33) (Linoleate (13S)-lipoxygenase) (Lipoxin synthase 12-LO) (EC 3.3.2.-) (Platelet-type lipoxygenase 12)	ALOX12	P18054	239
Cuscutae Semen	MOL000354	isorhamnetin	Vasopressin V2 receptor (V2R) (AVPR V2) (Antidiuretic hormone receptor) (Renal-type arginine vasopressin receptor)	AVPR2	P30518	554
Cuscutae Semen	MOL000354	isorhamnetin	Amine oxidase [flavin-containing] A (EC 1.4.3.4) (Monoamine oxidase type A) (MAO-A)	MAOA	P21397	4128
Cuscutae Semen	MOL000354	isorhamnetin	Receptor-type tyrosine-protein kinase FLT3 (EC 2.7.10.1) (FL cytokine receptor) (Fetal liver kinase-2) (FLK-2) (Fms-like tyrosine kinase 3) (FLT-3) (Stem cell tyrosine kinase 1) (STK-1) (CD antigen CD135)	FLT3	P36888	2322
Cuscutae Semen	MOL000354	isorhamnetin	Aromatase (EC 1.14.14.14) (CYPXIX) (Cytochrome P-450AROM) (Cytochrome P450 19A1) (Estrogen synthase)	CYP19A1	P11511	1588
Cuscutae Semen	MOL000354	isorhamnetin	Prothrombin (EC 3.4.21.5) (Coagulation factor II) [Cleaved into: Activation peptide fragment 1; Activation peptide fragment 2; Thrombin light chain; Thrombin heavy chain]	F2	P00734	2147
Cuscutae Semen	MOL000354	isorhamnetin	Serine/threonine-protein kinase pim-1 (EC 2.7.11.1)	PIM1	P11309	5292
Cuscutae Semen	MOL000354	isorhamnetin	Polyunsaturated fatty acid 5-lipoxygenase (EC 1.13.11.-) (Arachidonate 5-lipoxygenase) (5-LO) (5-lipoxygenase) (EC 1.13.11.34)	ALOX5	P09917	240
Cuscutae Semen	MOL000354	isorhamnetin	Aurora kinase B (EC 2.7.11.1) (Aurora 1) (Aurora- and IPL1-like midbody-associated protein 1) (AIM-1) (Aurora/IPL1-related kinase 2) (ARK-2) (Aurora-related kinase 2) (STK-1) (Serine/threonine-protein kinase 12) (Serine/threonine-protein kinase 5) (Serine/threonine-protein kinase aurora-B)	AURKB	Q96GD4	9212
Cuscutae Semen	MOL000354	isorhamnetin	D(4) dopamine receptor (D(2C) dopamine receptor) (Dopamine D4 receptor)	DRD4	P21917	1815
Cuscutae Semen	MOL000354	isorhamnetin	Adenosine receptor A1	ADORA1	P30542	134
Cuscutae Semen	MOL000354	isorhamnetin	Lactoylglutathione lyase (EC 4.4.1.5) (Aldoketomutase) (Glyoxalase I) (Glx I) (Ketone-aldehyde mutase) (Methylglyoxalase) (S-D-lactoylglutathione methylglyoxal lyase)	GLO1	Q04760	2739
Cuscutae Semen	MOL000354	isorhamnetin	Myeloperoxidase (MPO) (EC 1.11.2.2) [Cleaved into: Myeloperoxidase; 89 kDa myeloperoxidase; 84 kDa myeloperoxidase; Myeloperoxidase light chain; Myeloperoxidase heavy chain]	MPO	P05164	4353
Cuscutae Semen	MOL000354	isorhamnetin	Phosphatidylinositol 3-kinase regulatory subunit alpha (PI3-kinase regulatory subunit alpha) (PI3K regulatory subunit alpha) (PtdIns-3-kinase regulatory subunit alpha) (Phosphatidylinositol 3-kinase 85 kDa regulatory subunit alpha) (PI3-kinase subunit p85-alpha) (PtdIns-3-kinase regulatory subunit p85-alpha)	PIK3R1	P27986	5295
Cuscutae Semen	MOL000354	isorhamnetin	Adenosine receptor A2a	ADORA2A	P29274	135
Cuscutae Semen	MOL000354	isorhamnetin	Death-associated protein kinase 1 (DAP kinase 1) (EC 2.7.11.1)	DAPK1	P53355	1612
Cuscutae Semen	MOL000354	isorhamnetin	Glycogen phosphorylase, liver form (EC 2.4.1.1)	PYGL	P06737	5836
Cuscutae Semen	MOL000354	isorhamnetin	Carbonic anhydrase 1 (EC 4.2.1.1) (Carbonate dehydratase I) (Carbonic anhydrase B) (CAB) (Carbonic anhydrase I) (CA-I)	CA1	P00915	759
Cuscutae Semen	MOL000354	isorhamnetin	Glycogen synthase kinase-3 beta (GSK-3 beta) (EC 2.7.11.26) (Serine/threonine-protein kinase GSK3B) (EC 2.7.11.1)	GSK3B	P49841	2932
Cuscutae Semen	MOL000354	isorhamnetin	Proto-oncogene tyrosine-protein kinase Src (EC 2.7.10.2) (Proto-oncogene c-Src) (pp60c-src) (p60-Src)	SRC	P12931	6714
Cuscutae Semen	MOL000354	isorhamnetin	Focal adhesion kinase 1 (FADK 1) (EC 2.7.10.2) (Focal adhesion kinase-related nonkinase) (FRNK) (Protein phosphatase 1 regulatory subunit 71) (PPP1R71) (Protein-tyrosine kinase 2) (p125FAK) (pp125FAK)	PTK2	Q05397	5747
Cuscutae Semen	MOL000354	isorhamnetin	Estradiol 17-beta-dehydrogenase 2 (EC 1.1.1.62) (17-beta-hydroxysteroid dehydrogenase type 2) (17-beta-HSD 2) (20 alpha-hydroxysteroid dehydrogenase) (20-alpha-HSD) (E2DH) (Microsomal 17-beta-hydroxysteroid dehydrogenase) (Short chain dehydrogenase/reductase family 9C member 2) (Testosterone 17-beta-dehydrogenase) (EC 1.1.1.239)	HSD17B2	P37059	3294
Cuscutae Semen	MOL000354	isorhamnetin	Vascular endothelial growth factor receptor 2 (VEGFR-2) (EC 2.7.10.1) (Fetal liver kinase 1) (FLK-1) (Kinase insert domain receptor) (KDR) (Protein-tyrosine kinase receptor flk-1) (CD antigen CD309)	KDR	P35968	3791
Cuscutae Semen	MOL000354	isorhamnetin	Collagenase 3 (EC 3.4.24.-) (Matrix metalloproteinase-13) (MMP-13)	MMP13	P45452	4322
Cuscutae Semen	MOL000354	isorhamnetin	Stromelysin-1 (SL-1) (EC 3.4.24.17) (Matrix metalloproteinase-3) (MMP-3) (Transin-1)	MMP3	P08254	4314
Cuscutae Semen	MOL000354	isorhamnetin	Carbonic anhydrase 3 (EC 4.2.1.1) (Carbonate dehydratase III) (Carbonic anhydrase III) (CA-III)	CA3	P07451	761
Cuscutae Semen	MOL000354	isorhamnetin	Serine/threonine-protein kinase PLK1 (EC 2.7.11.21) (Polo-like kinase 1) (PLK-1) (Serine/threonine-protein kinase 13) (STPK13)	PLK1	P53350	5347
Cuscutae Semen	MOL000354	isorhamnetin	Carbonic anhydrase 6 (EC 4.2.1.1) (Carbonate dehydratase VI) (Carbonic anhydrase VI) (CA-VI) (Salivary carbonic anhydrase) (Secreted carbonic anhydrase)	CA6	P23280	765
Cuscutae Semen	MOL000354	isorhamnetin	Cyclin-dependent kinase 1 (CDK1) (EC 2.7.11.22) (EC 2.7.11.23) (Cell division control protein 2 homolog) (Cell division protein kinase 1) (p34 protein kinase)	CDK1	P06493	983
Cuscutae Semen	MOL000354	isorhamnetin	Matrix metalloproteinase-9 (MMP-9) (EC 3.4.24.35) (92 kDa gelatinase) (92 kDa type IV collagenase) (Gelatinase B) (GELB) [Cleaved into: 67 kDa matrix metalloproteinase-9; 82 kDa matrix metalloproteinase-9]	MMP9	P14780	4318
Cuscutae Semen	MOL000354	isorhamnetin	72 kDa type IV collagenase (EC 3.4.24.24) (72 kDa gelatinase) (Gelatinase A) (Matrix metalloproteinase-2) (MMP-2) (TBE-1) [Cleaved into: PEX]	MMP2	P08253	4313
Cuscutae Semen	MOL000354	isorhamnetin	Serine/threonine-protein kinase N1 (EC 2.7.11.13) (Protease-activated kinase 1) (PAK-1) (Protein kinase C-like 1) (Protein kinase C-like PKN) (Protein kinase PKN-alpha) (Protein-kinase C-related kinase 1) (Serine-threonine protein kinase N)	PKN1	Q16512	5585
Cuscutae Semen	MOL000354	isorhamnetin	Carbonic anhydrase 14 (EC 4.2.1.1) (Carbonate dehydratase XIV) (Carbonic anhydrase XIV) (CA-XIV)	CA14	Q9ULX7	23632
Cuscutae Semen	MOL000354	isorhamnetin	Carbonic anhydrase 9 (EC 4.2.1.1) (Carbonate dehydratase IX) (Carbonic anhydrase IX) (CA-IX) (CAIX) (Membrane antigen MN) (P54/58N) (Renal cell carcinoma-associated antigen G250) (RCC-associated antigen G250) (pMW1)	CA9	Q16790	768
Cuscutae Semen	MOL000354	isorhamnetin	Casein kinase II subunit alpha (CK II alpha) (EC 2.7.11.1)	CSNK2A1	P68400	1457
Cuscutae Semen	MOL000354	isorhamnetin	Hepatocyte growth factor receptor (HGF receptor) (EC 2.7.10.1) (HGF/SF receptor) (Proto-oncogene c-Met) (Scatter factor receptor) (SF receptor) (Tyrosine-protein kinase Met)	MET	P08581	4233
Cuscutae Semen	MOL000354	isorhamnetin	Serine/threonine-protein kinase Nek2 (EC 2.7.11.1) (HSPK 21) (Never in mitosis A-related kinase 2) (NimA-related protein kinase 2) (NimA-like protein kinase 1)	NEK2	P51955	4751
Cuscutae Semen	MOL000354	isorhamnetin	C-X-C chemokine receptor type 1 (CXC-R1) (CXCR-1) (CDw128a) (High affinity interleukin-8 receptor A) (IL-8R A) (IL-8 receptor type 1) (CD antigen CD181)	CXCR1	P25024	3577
Cuscutae Semen	MOL000354	isorhamnetin	Calcium/calmodulin-dependent protein kinase type II subunit beta (CaM kinase II subunit beta) (CaMK-II subunit beta) (EC 2.7.11.17)	CAMK2B	Q13554	816
Cuscutae Semen	MOL000354	isorhamnetin	ALK tyrosine kinase receptor (EC 2.7.10.1) (Anaplastic lymphoma kinase) (CD antigen CD246)	ALK	Q9UM73	238
Cuscutae Semen	MOL000354	isorhamnetin	RAC-alpha serine/threonine-protein kinase (EC 2.7.11.1) (Protein kinase B) (PKB) (Protein kinase B alpha) (PKB alpha) (Proto-oncogene c-Akt) (RAC-PK-alpha)	AKT1	P31749	207
Cuscutae Semen	MOL000354	isorhamnetin	ATP-dependent translocase ABCB1 (ATP-binding cassette sub-family B member 1) (Multidrug resistance protein 1) (EC 7.6.2.2) (P-glycoprotein 1) (Phospholipid transporter ABCB1) (EC 7.6.2.1) (CD antigen CD243)	ABCB1	P08183	5243
Cuscutae Semen	MOL000354	isorhamnetin	Serine/threonine-protein kinase Nek6 (EC 2.7.11.1) (Never in mitosis A-related kinase 6) (NimA-related protein kinase 6) (Protein kinase SID6-1512)	NEK6	Q9HC98	10783
Cuscutae Semen	MOL000354	isorhamnetin	Phospholipase A2 (EC 3.1.1.4) (Group IB phospholipase A2) (Phosphatidylcholine 2-acylhydrolase 1B)	PLA2G1B	P04054	5319
Cuscutae Semen	MOL000354	isorhamnetin	Carbonic anhydrase 5A, mitochondrial (EC 4.2.1.1) (Carbonate dehydratase VA) (Carbonic anhydrase VA) (CA-VA)	CA5A	P35218	763
Cuscutae Semen	MOL000354	isorhamnetin	Beta-secretase 1 (EC 3.4.23.46) (Aspartyl protease 2) (ASP2) (Asp 2) (Beta-site amyloid precursor protein cleaving enzyme 1) (Beta-site APP cleaving enzyme 1) (Memapsin-2) (Membrane-associated aspartic protease 2)	BACE1	P56817	23621
Cuscutae Semen	MOL000354	isorhamnetin	Tyrosine-protein kinase receptor UFO (EC 2.7.10.1) (AXL oncogene)	AXL	P30530	558
Cuscutae Semen	MOL000354	isorhamnetin	NUAK family SNF1-like kinase 1 (EC 2.7.11.1) (AMPK-related protein kinase 5) (ARK5) (Omphalocele kinase 1)	NUAK1	O60285	9891
Cuscutae Semen	MOL000354	isorhamnetin	Aldo-keto reductase family 1 member C2 (EC 1.-.-.-) (3-alpha-HSD3) (Chlordecone reductase homolog HAKRD) (Dihydrodiol dehydrogenase 2) (DD-2) (DD2) (Dihydrodiol dehydrogenase/bile acid-binding protein) (DD/BABP) (Trans-1,2-dihydrobenzene-1,2-diol dehydrogenase) (EC 1.3.1.20) (Type III 3-alpha-hydroxysteroid dehydrogenase) (EC 1.1.1.357)	AKR1C2	P52895	1646
Cuscutae Semen	MOL000354	isorhamnetin	Aldo-keto reductase family 1 member C1 (EC 1.1.1.-) (20-alpha-hydroxysteroid dehydrogenase) (20-alpha-HSD) (EC 1.1.1.149) (Chlordecone reductase homolog HAKRC) (Dihydrodiol dehydrogenase 1/2) (DD1/DD2) (High-affinity hepatic bile acid-binding protein) (HBAB) (Indanol dehydrogenase) (EC 1.1.1.112) (Trans-1,2-dihydrobenzene-1,2-diol dehydrogenase) (EC 1.3.1.20)	AKR1C1	Q04828	1645
Cuscutae Semen	MOL000354	isorhamnetin	Aldo-keto reductase family 1 member C3 (EC 1.-.-.-) (17-beta-hydroxysteroid dehydrogenase type 5) (17-beta-HSD 5) (3-alpha-HSD type II, brain) (3-alpha-hydroxysteroid dehydrogenase type 2) (3-alpha-HSD type 2) (EC 1.1.1.357) (Chlordecone reductase homolog HAKRb) (Dihydrodiol dehydrogenase 3) (DD-3) (DD3) (Dihydrodiol dehydrogenase type I) (HA1753) (Indanol dehydrogenase) (EC 1.1.1.112) (Prostagla…	AKR1C3	P42330	8644
Cuscutae Semen	MOL000354	isorhamnetin	Aldo-keto reductase family 1 member C4 (EC 1.1.1.-) (3-alpha-HSD1) (3-alpha-hydroxysteroid dehydrogenase type I) (EC 1.1.1.357) (Chlordecone reductase) (CDR) (EC 1.1.1.225) (Dihydrodiol dehydrogenase 4) (DD-4) (DD4) (HAKRA)	AKR1C4	P17516	1109
Cuscutae Semen	MOL000354	isorhamnetin	Carbonic anhydrase 13 (EC 4.2.1.1) (Carbonate dehydratase XIII) (Carbonic anhydrase XIII) (CA-XIII)	CA13	Q8N1Q1	377677
Cuscutae Semen	MOL000354	isorhamnetin	Aldo-keto reductase family 1 member A1 (EC 1.1.1.2) (EC 1.1.1.372) (EC 1.1.1.54) (Alcohol dehydrogenase [NADP(+)]) (Aldehyde reductase) (Glucuronate reductase) (EC 1.1.1.19) (Glucuronolactone reductase) (EC 1.1.1.20)	AKR1A1	P14550	10327
Cuscutae Semen	MOL000354	isorhamnetin	G-protein coupled receptor 35 (Kynurenic acid receptor) (KYNA receptor)	GPR35	Q9HC97	2859
Cuscutae Semen	MOL000354	isorhamnetin	Microtubule-associated protein tau (Neurofibrillary tangle protein) (Paired helical filament-tau) (PHF-tau)	MAPT	P10636	4137
Cuscutae Semen	MOL000354	isorhamnetin	Lysine-specific demethylase 4E (EC 1.14.11.66) (KDM4D-like protein) (Lysine-specific demethylase 4D-like) ([histone H3]-trimethyl-L-lysine(9) demethylase 4E)	KDM4E	B2RXH2	390245
Cuscutae Semen	MOL000354	isorhamnetin	DNA topoisomerase 2-alpha (EC 5.6.2.2) (DNA topoisomerase II, alpha isozyme)	TOP2A	P11388	7153
Cuscutae Semen	MOL000354	isorhamnetin	Insulin receptor (IR) (EC 2.7.10.1) (CD antigen CD220) [Cleaved into: Insulin receptor subunit alpha; Insulin receptor subunit beta]	INSR	P06213	3643
Cuscutae Semen	MOL000354	isorhamnetin	Myosin light chain kinase, smooth muscle (MLCK) (smMLCK) (EC 2.7.11.18) (Kinase-related protein) (KRP) (Telokin) [Cleaved into: Myosin light chain kinase, smooth muscle, deglutamylated form]	MYLK	Q15746	4638
Cuscutae Semen	MOL000354	isorhamnetin	Tyrosine-protein kinase SYK (EC 2.7.10.2) (Spleen tyrosine kinase) (p72-Syk)	SYK	P43405	6850
Cuscutae Semen	MOL000354	isorhamnetin	Phosphatidylinositol 4,5-bisphosphate 3-kinase catalytic subunit gamma isoform (PI3-kinase subunit gamma) (PI3K-gamma) (PI3Kgamma) (PtdIns-3-kinase subunit gamma) (EC 2.7.1.153) (Phosphatidylinositol 4,5-bisphosphate 3-kinase 110 kDa catalytic subunit gamma) (PtdIns-3-kinase subunit p110-gamma) (p110gamma) (Phosphoinositide-3-kinase catalytic gamma polypeptide) (Serine/threonine protein kinase PI…	PIK3CG	P48736	5294
Cuscutae Semen	MOL000354	isorhamnetin	DNA-(apurinic or apyrimidinic site) endonuclease (EC 3.1.-.-) (APEX nuclease) (APEN) (Apurinic-apyrimidinic endonuclease 1) (AP endonuclease 1) (APE-1) (REF-1) (Redox factor-1) [Cleaved into: DNA-(apurinic or apyrimidinic site) endonuclease, mitochondrial]	APEX1	P27695	328
Cuscutae Semen	MOL000354	isorhamnetin	Cyclin-dependent kinase 5 activator 1 (CDK5 activator 1) (Cyclin-dependent kinase 5 regulatory subunit 1) (TPKII regulatory subunit) [Cleaved into: Cyclin-dependent kinase 5 activator 1, p35 (p35); Cyclin-dependent kinase 5 activator 1, p25 (p25) (Tau protein kinase II 23 kDa subunit) (p23)]	CDK5R1	Q15078	8851
Cuscutae Semen	MOL000354	isorhamnetin	Cyclin-dependent-like kinase 5 (EC 2.7.11.1) (Cell division protein kinase 5) (Serine/threonine-protein kinase PSSALRE) (Tau protein kinase II catalytic subunit) (TPKII catalytic subunit)	CDK5	Q00535	1020
Cuscutae Semen	MOL000354	isorhamnetin	G2/mitotic-specific cyclin-B3	CCNB3	Q8WWL7	85417
Cuscutae Semen	MOL000354	isorhamnetin	Cyclin-dependent kinase 1 (CDK1) (EC 2.7.11.22) (EC 2.7.11.23) (Cell division control protein 2 homolog) (Cell division protein kinase 1) (p34 protein kinase)	CDK1	P06493	983
Cuscutae Semen	MOL000354	isorhamnetin	G2/mitotic-specific cyclin-B1	CCNB1	P14635	891
Cuscutae Semen	MOL000354	isorhamnetin	G2/mitotic-specific cyclin-B2	CCNB2	O95067	9133
Cuscutae Semen	MOL000354	isorhamnetin	Cyclin-dependent kinase 6 (EC 2.7.11.22) (Cell division protein kinase 6) (Serine/threonine-protein kinase PLSTIRE)	CDK6	Q00534	1021
Cuscutae Semen	MOL000354	isorhamnetin	Cyclin-dependent kinase 2 (EC 2.7.11.22) (Cell division protein kinase 2) (p33 protein kinase)	CDK2	P24941	1017
Cuscutae Semen	MOL000354	isorhamnetin	Arginase-1 (EC 3.5.3.1) (Liver-type arginase) (Type I arginase)	ARG1	P05089	383
Cuscutae Semen	MOL000354	isorhamnetin	Amyloid-beta precursor protein (APP) (ABPP) (APPI) (Alzheimer disease amyloid protein) (Amyloid precursor protein) (Amyloid-beta A4 protein) (Cerebral vascular amyloid peptide) (CVAP) (PreA4) (Protease nexin-II) (PN-II) [Cleaved into: N-APP; Soluble APP-alpha (S-APP-alpha); Soluble APP-beta (S-APP-beta); C99 (Beta-secretase C-terminal fragment) (Beta-CTF); Amyloid-beta protein 42 (Abeta42) (Beta-…	APP	P05067	351
Cuscutae Semen	MOL000354	isorhamnetin	Induced myeloid leukemia cell differentiation protein Mcl-1 (Bcl-2-like protein 3) (Bcl2-L-3) (Bcl-2-related protein EAT/mcl1) (mcl1/EAT)	MCL1	Q07820	4170
Cuscutae Semen	MOL000354	isorhamnetin	Telomerase reverse transcriptase (EC 2.7.7.49) (HEST2) (Telomerase catalytic subunit) (Telomerase-associated protein 2) (TP2)	TERT	O14746	7015
Cuscutae Semen	MOL000354	isorhamnetin	Tyrosinase (EC 1.14.18.1) (LB24-AB) (Monophenol monooxygenase) (SK29-AB) (Tumor rejection antigen AB)	TYR	P14679	7299
Cuscutae Semen	MOL000354	isorhamnetin	Estradiol 17-beta-dehydrogenase 1 (EC 1.1.1.62) (17-beta-hydroxysteroid dehydrogenase type 1) (17-beta-HSD 1) (20 alpha-hydroxysteroid dehydrogenase) (20-alpha-HSD) (E2DH) (Placental 17-beta-hydroxysteroid dehydrogenase) (Short chain dehydrogenase/reductase family 28C member 1)	HSD17B1	P14061	3292
Cuscutae Semen	MOL000354	isorhamnetin	Aryl hydrocarbon receptor (Ah receptor) (AhR) (Class E basic helix-loop-helix protein 76) (bHLHe76)	AHR	P35869	196
Cuscutae Semen	MOL000354	isorhamnetin	Steroid hormone receptor ERR1 (Estrogen receptor-like 1) (Estrogen-related receptor alpha) (ERR-alpha) (Nuclear receptor subfamily 3 group B member 1)	ESRRA	P11474	2101
Cuscutae Semen	MOL000354	isorhamnetin	Receptor-type tyrosine-protein phosphatase S (R-PTP-S) (EC 3.1.3.48) (Receptor-type tyrosine-protein phosphatase sigma) (R-PTP-sigma)	PTPRS	Q13332	5802
Cuscutae Semen	MOL000354	isorhamnetin	Plasminogen (EC 3.4.21.7) [Cleaved into: Plasmin heavy chain A; Activation peptide; Angiostatin; Plasmin heavy chain A, short form; Plasmin light chain B]	PLG	P00747	5340
Cuscutae Semen	MOL000354	isorhamnetin	Estrogen receptor beta (ER-beta) (Nuclear receptor subfamily 3 group A member 2)	ESR2	Q92731	2100
Cuscutae Semen	MOL000354	isorhamnetin	DNA-3-methyladenine glycosylase (EC 3.2.2.21) (3-alkyladenine DNA glycosylase) (3-methyladenine DNA glycosidase) (ADPG) (N-methylpurine-DNA glycosylase)	MPG	P29372	4350
Cuscutae Semen	MOL000354	isorhamnetin	Solute carrier family 22 member 12 (Organic anion transporter 4-like protein) (Renal-specific transporter) (RST) (Urate anion exchanger 1)	SLC22A12	Q96S37	116085
Cuscutae Semen	MOL000354	isorhamnetin	Poly [ADP-ribose] polymerase 1 (PARP-1) (EC 2.4.2.30) (ADP-ribosyltransferase diphtheria toxin-like 1) (ARTD1) (DNA ADP-ribosyltransferase PARP1) (EC 2.4.2.-) (NAD(+) ADP-ribosyltransferase 1) (ADPRT 1) (Poly[ADP-ribose] synthase 1) (Protein poly-ADP-ribosyltransferase PARP1) (EC 2.4.2.-)	PARP1	P09874	142
Cuscutae Semen	MOL000354	isorhamnetin	Transthyretin (ATTR) (Prealbumin) (TBPA)	TTR	P02766	7276
Cuscutae Semen	MOL000354	isorhamnetin	Macrophage metalloelastase (MME) (EC 3.4.24.65) (Macrophage elastase) (ME) (hME) (Matrix metalloproteinase-12) (MMP-12)	MMP12	P39900	4321
Cuscutae Semen	MOL000354	isorhamnetin	ADP-ribosyl cyclase/cyclic ADP-ribose hydrolase 1 (EC 3.2.2.6) (2'-phospho-ADP-ribosyl cyclase) (2'-phospho-ADP-ribosyl cyclase/2'-phospho-cyclic-ADP-ribose transferase) (EC 2.4.99.20) (2'-phospho-cyclic-ADP-ribose transferase) (ADP-ribosyl cyclase 1) (ADPRC 1) (Cyclic ADP-ribose hydrolase 1) (cADPr hydrolase 1) (T10) (CD antigen CD38)	CD38	P28907	952
Cuscutae Semen	MOL000354	isorhamnetin	Aldo-keto reductase family 1 member B10 (EC 1.1.1.300) (EC 1.1.1.54) (ARL-1) (Aldose reductase-like) (Aldose reductase-related protein) (ARP) (hARP) (Small intestine reductase) (SI reductase)	AKR1B10	O60218	57016
Cuscutae Semen	MOL000354	isorhamnetin	Poly [ADP-ribose] polymerase tankyrase-2 (EC 2.4.2.30) (ADP-ribosyltransferase diphtheria toxin-like 6) (ARTD6) (Poly [ADP-ribose] polymerase 5B) (Protein poly-ADP-ribosyltransferase tankyrase-2) (EC 2.4.2.-) (TNKS-2) (TRF1-interacting ankyrin-related ADP-ribose polymerase 2) (Tankyrase II) (Tankyrase-2) (TANK2) (Tankyrase-like protein) (Tankyrase-related protein)	TNKS2	Q9H2K2	80351
Cuscutae Semen	MOL000953	CLR	Androgen receptor (Dihydrotestosterone receptor) (Nuclear receptor subfamily 3 group C member 4)	AR	P10275	367
Cuscutae Semen	MOL000953	CLR	NPC1-like intracellular cholesterol transporter 1 (Niemann-Pick C1-like protein 1)	NPC1L1	Q9UHC9	29881
Cuscutae Semen	MOL000953	CLR	Steroid 17-alpha-hydroxylase/17,20 lyase (EC 1.14.14.19) (17-alpha-hydroxyprogesterone aldolase) (EC 1.14.14.32) (CYPXVII) (Cytochrome P450 17A1) (Cytochrome P450-C17) (Cytochrome P450c17) (Steroid 17-alpha-monooxygenase)	CYP17A1	P05093	1586
Cuscutae Semen	MOL000953	CLR	Oxysterols receptor LXR-alpha (Liver X receptor alpha) (Nuclear receptor subfamily 1 group H member 3)	NR1H3	Q13133	10062
Cuscutae Semen	MOL000953	CLR	3-hydroxy-3-methylglutaryl-coenzyme A reductase (HMG-CoA reductase) (EC 1.1.1.34)	HMGCR	P04035	3156
Cuscutae Semen	MOL000953	CLR	Lanosterol 14-alpha demethylase (LDM) (EC 1.14.14.154) (CYPLI) (Cytochrome P450 51A1) (Cytochrome P450-14DM) (Cytochrome P45014DM) (Cytochrome P450LI) (Sterol 14-alpha demethylase)	CYP51A1	Q16850	1595
Cuscutae Semen	MOL000953	CLR	Sterol regulatory element-binding protein 2 (SREBP-2) (Class D basic helix-loop-helix protein 2) (bHLHd2) (Sterol regulatory element-binding transcription factor 2) [Cleaved into: Processed sterol regulatory element-binding protein 2]	SREBF2	Q12772	6721
Cuscutae Semen	MOL000953	CLR	Aromatase (EC 1.14.14.14) (CYPXIX) (Cytochrome P-450AROM) (Cytochrome P450 19A1) (Estrogen synthase)	CYP19A1	P11511	1588
Cuscutae Semen	MOL000953	CLR	Estrogen receptor beta (ER-beta) (Nuclear receptor subfamily 3 group A member 2)	ESR2	Q92731	2100
Cuscutae Semen	MOL000953	CLR	Estrogen receptor (ER) (ER-alpha) (Estradiol receptor) (Nuclear receptor subfamily 3 group A member 1)	ESR1	P03372	2099
Cuscutae Semen	MOL000953	CLR	Sex hormone-binding globulin (SHBG) (Sex steroid-binding protein) (SBP) (Testis-specific androgen-binding protein) (ABP) (Testosterone-estradiol-binding globulin) (TeBG) (Testosterone-estrogen-binding globulin)	SHBG	P04278	6462
Cuscutae Semen	MOL000953	CLR	Nuclear receptor ROR-gamma (Nuclear receptor RZR-gamma) (Nuclear receptor subfamily 1 group F member 3) (RAR-related orphan receptor C) (Retinoid-related orphan receptor-gamma)	RORC	P51449	6097
Cuscutae Semen	MOL000953	CLR	Sodium-dependent noradrenaline transporter (Norepinephrine transporter) (NET) (Solute carrier family 6 member 2)	SLC6A2	P23975	6530
Cuscutae Semen	MOL000953	CLR	Sodium-dependent serotonin transporter (SERT) (5HT transporter) (5HTT) (Solute carrier family 6 member 4)	SLC6A4	P31645	6532
Cuscutae Semen	MOL000953	CLR	Tyrosine-protein phosphatase non-receptor type 1 (EC 3.1.3.48) (Protein-tyrosine phosphatase 1B) (PTP-1B)	PTPN1	P18031	5770
Cuscutae Semen	MOL000953	CLR	Cholinesterase (EC 3.1.1.8) (Acylcholine acylhydrolase) (Butyrylcholine esterase) (Choline esterase II) (Pseudocholinesterase)	BCHE	P06276	590
Cuscutae Semen	MOL000953	CLR	Glucose-6-phosphate 1-dehydrogenase (G6PD) (EC 1.1.1.49)	G6PD	P11413	2539
Cuscutae Semen	MOL000953	CLR	Nuclear receptor ROR-alpha (Nuclear receptor RZR-alpha) (Nuclear receptor subfamily 1 group F member 1) (RAR-related orphan receptor A) (Retinoid-related orphan receptor-alpha)	RORA	P35398	6095
Cuscutae Semen	MOL000953	CLR	Muscarinic acetylcholine receptor M2	CHRM2	P08172	1129
Cuscutae Semen	MOL000953	CLR	Acetylcholinesterase (AChE) (EC 3.1.1.7)	ACHE	P22303	43
Cuscutae Semen	MOL000953	CLR	Corticosteroid-binding globulin (CBG) (Serpin A6) (Transcortin)	SERPINA6	P08185	866
Cuscutae Semen	MOL000953	CLR	Cytochrome P450 2C19 (EC 1.14.14.1) ((R)-limonene 6-monooxygenase) (EC 1.14.14.53) ((S)-limonene 6-monooxygenase) (EC 1.14.14.51) ((S)-limonene 7-monooxygenase) (EC 1.14.14.52) (CYPIIC17) (CYPIIC19) (Cytochrome P450-11A) (Cytochrome P450-254C) (Fenbendazole monooxygenase (4'-hydroxylating)) (EC 1.14.14.75) (Mephenytoin 4-hydroxylase)	CYP2C19	P33261	1557
Cuscutae Semen	MOL000953	CLR	Oxysterols receptor LXR-beta (Liver X receptor beta) (Nuclear receptor NER) (Nuclear receptor subfamily 1 group H member 2) (Ubiquitously-expressed nuclear receptor)	NR1H2	P55055	7376
Cuscutae Semen	MOL000953	CLR	Vitamin D3 receptor (VDR) (1,25-dihydroxyvitamin D3 receptor) (Nuclear receptor subfamily 1 group I member 1)	VDR	P11473	7421
Cuscutae Semen	MOL000953	CLR	Nuclear receptor subfamily 1 group I member 3 (Constitutive activator of retinoid response) (Constitutive active response) (Constitutive androstane receptor) (CAR) (Orphan nuclear receptor MB67)	NR1I3	Q14994	9970
Cuscutae Semen	MOL000953	CLR	Prostaglandin E2 receptor EP1 subtype (PGE receptor EP1 subtype) (PGE2 receptor EP1 subtype) (Prostanoid EP1 receptor)	PTGER1	P34995	5731
Cuscutae Semen	MOL000953	CLR	Prostaglandin E2 receptor EP2 subtype (PGE receptor EP2 subtype) (PGE2 receptor EP2 subtype) (Prostanoid EP2 receptor)	PTGER2	P43116	5732
Cuscutae Semen	MOL000953	CLR	M-phase inducer phosphatase 1 (EC 3.1.3.48) (Dual specificity phosphatase Cdc25A)	CDC25A	P30304	993
Cuscutae Semen	MOL000953	CLR	Cocaine esterase (EC 3.1.1.84) (Carboxylesterase 2) (CE-2) (hCE-2) (EC 3.1.1.1) (Methylumbelliferyl-acetate deacetylase 2) (EC 3.1.1.56)	CES2	O00748	8824
Cuscutae Semen	MOL000953	CLR	Corticosteroid 11-beta-dehydrogenase isozyme 1 (EC 1.1.1.146) (11-beta-hydroxysteroid dehydrogenase 1) (11-DH) (11-beta-HSD1) (Short chain dehydrogenase/reductase family 26C member 1)	HSD11B1	P28845	3290
Cuscutae Semen	MOL000953	CLR	Peroxisome proliferator-activated receptor delta (PPAR-delta) (NUCI) (Nuclear hormone receptor 1) (NUC1) (Nuclear receptor subfamily 1 group C member 2) (Peroxisome proliferator-activated receptor beta) (PPAR-beta)	PPARD	Q03181	5467
Cuscutae Semen	MOL000953	CLR	Glycine receptor subunit alpha-1 (Glycine receptor 48 kDa subunit) (Glycine receptor strychnine-binding subunit)	GLRA1	P23415	2741
Cuscutae Semen	MOL000953	CLR	Squalene monooxygenase (EC 1.14.14.17) (Squalene epoxidase) (SE)	SQLE	Q14534	6713
Cuscutae Semen	MOL000953	CLR	7-dehydrocholesterol reductase (7-DHC reductase) (EC 1.3.1.21) (Delta7-sterol reductase) (Sterol Delta(7)-reductase) (Sterol reductase SR-2)	DHCR7	Q9UBM7	1717
Cuscutae Semen	MOL000953	CLR	Tyrosine-protein phosphatase non-receptor type 6 (EC 3.1.3.48) (Hematopoietic cell protein-tyrosine phosphatase) (Protein-tyrosine phosphatase 1C) (PTP-1C) (Protein-tyrosine phosphatase SHP-1) (SH-PTP1)	PTPN6	P29350	5777
Cuscutae Semen	MOL000953	CLR	M-phase inducer phosphatase 2 (EC 3.1.3.48) (Dual specificity phosphatase Cdc25B)	CDC25B	P30305	994
Cuscutae Semen	MOL000953	CLR	Tyrosine-protein phosphatase non-receptor type 2 (EC 3.1.3.48) (T-cell protein-tyrosine phosphatase) (TCPTP)	PTPN2	P17706	5771
Cuscutae Semen	MOL000953	CLR	Glucocorticoid receptor (GR) (Nuclear receptor subfamily 3 group C member 1)	NR3C1	P04150	2908
Cuscutae Semen	MOL000953	CLR	Sigma non-opioid intracellular receptor 1 (Aging-associated gene 8 protein) (SR31747-binding protein) (SR-BP) (Sigma 1-type opioid receptor) (SIG-1R) (Sigma1-receptor) (Sigma1R) (hSigmaR1)	SIGMAR1	Q99720	10280
Cuscutae Semen	MOL000953	CLR	D(2) dopamine receptor (Dopamine D2 receptor)	DRD2	P14416	1813
Cuscutae Semen	MOL000953	CLR	Sonic hedgehog protein (SHH) (HHG-1) (Shh unprocessed N-terminal signaling and C-terminal autoprocessing domains) (ShhNC) [Cleaved into: Sonic hedgehog protein N-product (ShhN) (Shh N-terminal processed signaling domains) (ShhNp)]	SHH	Q15465	6469
Cuscutae Semen	MOL000953	CLR	Prostaglandin E synthase (EC 5.3.99.3) (Microsomal glutathione S-transferase 1-like 1) (MGST1-L1) (Microsomal prostaglandin E synthase 1) (MPGES-1) (p53-induced gene 12 protein)	PTGES	O14684	9536
Cuscutae Semen	MOL000953	CLR	DNA polymerase beta (EC 2.7.7.7) (EC 4.2.99.-)	POLB	P06746	5423
Cuscutae Semen	MOL000953	CLR	Prolyl endopeptidase (PE) (EC 3.4.21.26) (Post-proline cleaving enzyme)	PREP	P48147	5550
Cuscutae Semen	MOL001558	sesamin	Induced myeloid leukemia cell differentiation protein Mcl-1 (Bcl-2-like protein 3) (Bcl2-L-3) (Bcl-2-related protein EAT/mcl1) (mcl1/EAT)	MCL1	Q07820	4170
Cuscutae Semen	MOL001558	sesamin	Mitogen-activated protein kinase 9 (MAP kinase 9) (MAPK 9) (EC 2.7.11.24) (JNK-55) (Stress-activated protein kinase 1a) (SAPK1a) (Stress-activated protein kinase JNK2) (c-Jun N-terminal kinase 2)	MAPK9	P45984	5601
Cuscutae Semen	MOL001558	sesamin	Polyunsaturated fatty acid 5-lipoxygenase (EC 1.13.11.-) (Arachidonate 5-lipoxygenase) (5-LO) (5-lipoxygenase) (EC 1.13.11.34)	ALOX5	P09917	240
Cuscutae Semen	MOL001558	sesamin	Sodium/glucose cotransporter 2 (Na(+)/glucose cotransporter 2) (Low affinity sodium-glucose cotransporter) (Solute carrier family 5 member 2)	SLC5A2	P31639	6524
Cuscutae Semen	MOL001558	sesamin	Sodium-dependent noradrenaline transporter (Norepinephrine transporter) (NET) (Solute carrier family 6 member 2)	SLC6A2	P23975	6530
Cuscutae Semen	MOL001558	sesamin	Sodium-dependent dopamine transporter (DA transporter) (DAT) (Solute carrier family 6 member 3)	SLC6A3	Q01959	6531
Cuscutae Semen	MOL001558	sesamin	Platelet-activating factor receptor (PAF-R) (PAFr)	PTAFR	P25105	5724
Cuscutae Semen	MOL001558	sesamin	Sterol O-acyltransferase 1 (EC 2.3.1.26) (Acyl-coenzyme A:cholesterol acyltransferase 1) (ACAT-1) (Cholesterol acyltransferase 1)	SOAT1	P35610	6646
Cuscutae Semen	MOL001558	sesamin	Sterol O-acyltransferase 2 (EC 2.3.1.26) (Acyl-coenzyme A:cholesterol acyltransferase 2) (ACAT-2) (Cholesterol acyltransferase 2)	SOAT2	O75908	8435
Cuscutae Semen	MOL001558	sesamin	Hypoxia-inducible factor 1-alpha (HIF-1-alpha) (HIF1-alpha) (ARNT-interacting protein) (Basic-helix-loop-helix-PAS protein MOP1) (Class E basic helix-loop-helix protein 78) (bHLHe78) (Member of PAS protein 1) (PAS domain-containing protein 8)	HIF1A	Q16665	3091
Cuscutae Semen	MOL001558	sesamin	Free fatty acid receptor 1 (G-protein coupled receptor 40)	FFAR1	O14842	2864
Cuscutae Semen	MOL005043	campest-5-en-3beta-ol	Androgen receptor (Dihydrotestosterone receptor) (Nuclear receptor subfamily 3 group C member 4)	AR	P10275	367
Cuscutae Semen	MOL005043	campest-5-en-3beta-ol	Oxysterols receptor LXR-alpha (Liver X receptor alpha) (Nuclear receptor subfamily 1 group H member 3)	NR1H3	Q13133	10062
Cuscutae Semen	MOL005043	campest-5-en-3beta-ol	3-hydroxy-3-methylglutaryl-coenzyme A reductase (HMG-CoA reductase) (EC 1.1.1.34)	HMGCR	P04035	3156
Cuscutae Semen	MOL005043	campest-5-en-3beta-ol	Lanosterol 14-alpha demethylase (LDM) (EC 1.14.14.154) (CYPLI) (Cytochrome P450 51A1) (Cytochrome P450-14DM) (Cytochrome P45014DM) (Cytochrome P450LI) (Sterol 14-alpha demethylase)	CYP51A1	Q16850	1595
Cuscutae Semen	MOL005043	campest-5-en-3beta-ol	NPC1-like intracellular cholesterol transporter 1 (Niemann-Pick C1-like protein 1)	NPC1L1	Q9UHC9	29881
Cuscutae Semen	MOL005043	campest-5-en-3beta-ol	Steroid 17-alpha-hydroxylase/17,20 lyase (EC 1.14.14.19) (17-alpha-hydroxyprogesterone aldolase) (EC 1.14.14.32) (CYPXVII) (Cytochrome P450 17A1) (Cytochrome P450-C17) (Cytochrome P450c17) (Steroid 17-alpha-monooxygenase)	CYP17A1	P05093	1586
Cuscutae Semen	MOL005043	campest-5-en-3beta-ol	Nuclear receptor ROR-gamma (Nuclear receptor RZR-gamma) (Nuclear receptor subfamily 1 group F member 3) (RAR-related orphan receptor C) (Retinoid-related orphan receptor-gamma)	RORC	P51449	6097
Cuscutae Semen	MOL005043	campest-5-en-3beta-ol	Aromatase (EC 1.14.14.14) (CYPXIX) (Cytochrome P-450AROM) (Cytochrome P450 19A1) (Estrogen synthase)	CYP19A1	P11511	1588
Cuscutae Semen	MOL005043	campest-5-en-3beta-ol	Estrogen receptor (ER) (ER-alpha) (Estradiol receptor) (Nuclear receptor subfamily 3 group A member 1)	ESR1	P03372	2099
Cuscutae Semen	MOL005043	campest-5-en-3beta-ol	Sex hormone-binding globulin (SHBG) (Sex steroid-binding protein) (SBP) (Testis-specific androgen-binding protein) (ABP) (Testosterone-estradiol-binding globulin) (TeBG) (Testosterone-estrogen-binding globulin)	SHBG	P04278	6462
Cuscutae Semen	MOL005043	campest-5-en-3beta-ol	Estrogen receptor beta (ER-beta) (Nuclear receptor subfamily 3 group A member 2)	ESR2	Q92731	2100
Cuscutae Semen	MOL005043	campest-5-en-3beta-ol	Sterol regulatory element-binding protein 2 (SREBP-2) (Class D basic helix-loop-helix protein 2) (bHLHd2) (Sterol regulatory element-binding transcription factor 2) [Cleaved into: Processed sterol regulatory element-binding protein 2]	SREBF2	Q12772	6721
Cuscutae Semen	MOL005043	campest-5-en-3beta-ol	Sodium-dependent noradrenaline transporter (Norepinephrine transporter) (NET) (Solute carrier family 6 member 2)	SLC6A2	P23975	6350
Cuscutae Semen	MOL005043	campest-5-en-3beta-ol	Muscarinic acetylcholine receptor M2	CHRM2	P08172	1129
Cuscutae Semen	MOL005043	campest-5-en-3beta-ol	Cytochrome P450 2C19 (EC 1.14.14.1) ((R)-limonene 6-monooxygenase) (EC 1.14.14.53) ((S)-limonene 6-monooxygenase) (EC 1.14.14.51) ((S)-limonene 7-monooxygenase) (EC 1.14.14.52) (CYPIIC17) (CYPIIC19) (Cytochrome P450-11A) (Cytochrome P450-254C) (Fenbendazole monooxygenase (4'-hydroxylating)) (EC 1.14.14.75) (Mephenytoin 4-hydroxylase)	CYP2C19	P33261	1557
Cuscutae Semen	MOL005043	campest-5-en-3beta-ol	Nuclear receptor ROR-alpha (Nuclear receptor RZR-alpha) (Nuclear receptor subfamily 1 group F member 1) (RAR-related orphan receptor A) (Retinoid-related orphan receptor-alpha)	RORA	P35398	6095
Cuscutae Semen	MOL005043	campest-5-en-3beta-ol	Tyrosine-protein phosphatase non-receptor type 1 (EC 3.1.3.48) (Protein-tyrosine phosphatase 1B) (PTP-1B)	PTPN1	P18031	5770
Cuscutae Semen	MOL005043	campest-5-en-3beta-ol	Corticosteroid-binding globulin (CBG) (Serpin A6) (Transcortin)	SERPINA6	P08185	866
Cuscutae Semen	MOL005043	campest-5-en-3beta-ol	Cholinesterase (EC 3.1.1.8) (Acylcholine acylhydrolase) (Butyrylcholine esterase) (Choline esterase II) (Pseudocholinesterase)	BCHE	P06276	590
Cuscutae Semen	MOL005440	Isofucosterol	Oxysterols receptor LXR-alpha (Liver X receptor alpha) (Nuclear receptor subfamily 1 group H member 3)	NR1H3	Q13133	10062
Cuscutae Semen	MOL005440	Isofucosterol	3-hydroxy-3-methylglutaryl-coenzyme A reductase (HMG-CoA reductase) (EC 1.1.1.34)	HMGCR	P04035	3156
Cuscutae Semen	MOL005440	Isofucosterol	Lanosterol 14-alpha demethylase (LDM) (EC 1.14.14.154) (CYPLI) (Cytochrome P450 51A1) (Cytochrome P450-14DM) (Cytochrome P45014DM) (Cytochrome P450LI) (Sterol 14-alpha demethylase)	CYP51A1	Q16850	1595
Cuscutae Semen	MOL005440	Isofucosterol	NPC1-like intracellular cholesterol transporter 1 (Niemann-Pick C1-like protein 1)	NPC1L1	Q9UHC9	29881
Cuscutae Semen	MOL005440	Isofucosterol	Androgen receptor (Dihydrotestosterone receptor) (Nuclear receptor subfamily 3 group C member 4)	AR	P10275	367
Cuscutae Semen	MOL005440	Isofucosterol	Nuclear receptor ROR-gamma (Nuclear receptor RZR-gamma) (Nuclear receptor subfamily 1 group F member 3) (RAR-related orphan receptor C) (Retinoid-related orphan receptor-gamma)	RORC	P51449	6097
Cuscutae Semen	MOL005440	Isofucosterol	Steroid 17-alpha-hydroxylase/17,20 lyase (EC 1.14.14.19) (17-alpha-hydroxyprogesterone aldolase) (EC 1.14.14.32) (CYPXVII) (Cytochrome P450 17A1) (Cytochrome P450-C17) (Cytochrome P450c17) (Steroid 17-alpha-monooxygenase)	CYP17A1	P05093	1586
Cuscutae Semen	MOL005440	Isofucosterol	Estrogen receptor (ER) (ER-alpha) (Estradiol receptor) (Nuclear receptor subfamily 3 group A member 1)	ESR1	P03372	2099
Cuscutae Semen	MOL005440	Isofucosterol	Estrogen receptor beta (ER-beta) (Nuclear receptor subfamily 3 group A member 2)	ESR2	Q92731	2100
Cuscutae Semen	MOL005440	Isofucosterol	Sterol regulatory element-binding protein 2 (SREBP-2) (Class D basic helix-loop-helix protein 2) (bHLHd2) (Sterol regulatory element-binding transcription factor 2) [Cleaved into: Processed sterol regulatory element-binding protein 2]	SREBF2	Q12772	6721
Cuscutae Semen	MOL005440	Isofucosterol	Sex hormone-binding globulin (SHBG) (Sex steroid-binding protein) (SBP) (Testis-specific androgen-binding protein) (ABP) (Testosterone-estradiol-binding globulin) (TeBG) (Testosterone-estrogen-binding globulin)	SHBG	P04278	6462
Cuscutae Semen	MOL005440	Isofucosterol	Aromatase (EC 1.14.14.14) (CYPXIX) (Cytochrome P-450AROM) (Cytochrome P450 19A1) (Estrogen synthase)	CYP19A1	P11511	1588
Cuscutae Semen	MOL005440	Isofucosterol	Sodium-dependent noradrenaline transporter (Norepinephrine transporter) (NET) (Solute carrier family 6 member 2)	SLC6A2	P23975	6530
Cuscutae Semen	MOL005440	Isofucosterol	Nuclear receptor ROR-alpha (Nuclear receptor RZR-alpha) (Nuclear receptor subfamily 1 group F member 1) (RAR-related orphan receptor A) (Retinoid-related orphan receptor-alpha)	RORA	P35398	6095
Cuscutae Semen	MOL005440	Isofucosterol	Corticosteroid-binding globulin (CBG) (Serpin A6) (Transcortin)	SERPINA6	P08185	866
Cuscutae Semen	MOL005440	Isofucosterol	Tyrosine-protein phosphatase non-receptor type 1 (EC 3.1.3.48) (Protein-tyrosine phosphatase 1B) (PTP-1B)	PTPN1	P18031	5770
Cuscutae Semen	MOL005440	Isofucosterol	Cholinesterase (EC 3.1.1.8) (Acylcholine acylhydrolase) (Butyrylcholine esterase) (Choline esterase II) (Pseudocholinesterase)	BCHE	P06276	590
Cuscutae Semen	MOL005440	Isofucosterol	Acetylcholinesterase (AChE) (EC 3.1.1.7)	ACHE	P22303	43
Cuscutae Semen	MOL005440	Isofucosterol	Sodium-dependent serotonin transporter (SERT) (5HT transporter) (5HTT) (Solute carrier family 6 member 4)	SLC6A4	P31645	6532
Cuscutae Semen	MOL005440	Isofucosterol	Cytochrome P450 2C19 (EC 1.14.14.1) ((R)-limonene 6-monooxygenase) (EC 1.14.14.53) ((S)-limonene 6-monooxygenase) (EC 1.14.14.51) ((S)-limonene 7-monooxygenase) (EC 1.14.14.52) (CYPIIC17) (CYPIIC19) (Cytochrome P450-11A) (Cytochrome P450-254C) (Fenbendazole monooxygenase (4'-hydroxylating)) (EC 1.14.14.75) (Mephenytoin 4-hydroxylase)	CYP2C19	P33261	1557
Cuscutae Semen	MOL005440	Isofucosterol	Nuclear receptor subfamily 1 group I member 3 (Constitutive activator of retinoid response) (Constitutive active response) (Constitutive androstane receptor) (CAR) (Orphan nuclear receptor MB67)	NR1I3	Q14994	9970
Cuscutae Semen	MOL005440	Isofucosterol	Glucose-6-phosphate 1-dehydrogenase (G6PD) (EC 1.1.1.49)	G6PD	P11413	2539
Cuscutae Semen	MOL005440	Isofucosterol	Muscarinic acetylcholine receptor M2	CHRM2	P08172	1129
Cuscutae Semen	MOL005440	Isofucosterol	Oxysterols receptor LXR-beta (Liver X receptor beta) (Nuclear receptor NER) (Nuclear receptor subfamily 1 group H member 2) (Ubiquitously-expressed nuclear receptor)	NR1H2	P55055	7376
Cuscutae Semen	MOL005440	Isofucosterol	Vitamin D3 receptor (VDR) (1,25-dihydroxyvitamin D3 receptor) (Nuclear receptor subfamily 1 group I member 1)	VDR	P11473	7421
Cuscutae Semen	MOL005440	Isofucosterol	Cocaine esterase (EC 3.1.1.84) (Carboxylesterase 2) (CE-2) (hCE-2) (EC 3.1.1.1) (Methylumbelliferyl-acetate deacetylase 2) (EC 3.1.1.56)	CES2	O00748	8824
Cuscutae Semen	MOL005440	Isofucosterol	Glycine receptor subunit alpha-1 (Glycine receptor 48 kDa subunit) (Glycine receptor strychnine-binding subunit)	GLRA1	P23415	2741
Cuscutae Semen	MOL005440	Isofucosterol	Prostaglandin E2 receptor EP1 subtype (PGE receptor EP1 subtype) (PGE2 receptor EP1 subtype) (Prostanoid EP1 receptor)	PTGER1	P34995	5731
Cuscutae Semen	MOL005440	Isofucosterol	Prostaglandin E2 receptor EP2 subtype (PGE receptor EP2 subtype) (PGE2 receptor EP2 subtype) (Prostanoid EP2 receptor)	PTGER2	P43116	5732
Cuscutae Semen	MOL005440	Isofucosterol	7-dehydrocholesterol reductase (7-DHC reductase) (EC 1.3.1.21) (Delta7-sterol reductase) (Sterol Delta(7)-reductase) (Sterol reductase SR-2)	DHCR7	Q9UBM7	1717
Cuscutae Semen	MOL005440	Isofucosterol	Corticosteroid 11-beta-dehydrogenase isozyme 1 (EC 1.1.1.146) (11-beta-hydroxysteroid dehydrogenase 1) (11-DH) (11-beta-HSD1) (Short chain dehydrogenase/reductase family 26C member 1)	HSD11B1	P28845	3290
Cuscutae Semen	MOL005440	Isofucosterol	Peroxisome proliferator-activated receptor alpha (PPAR-alpha) (Nuclear receptor subfamily 1 group C member 1)	PPARA	Q07869	5465
Cuscutae Semen	MOL005440	Isofucosterol	Peroxisome proliferator-activated receptor delta (PPAR-delta) (NUCI) (Nuclear hormone receptor 1) (NUC1) (Nuclear receptor subfamily 1 group C member 2) (Peroxisome proliferator-activated receptor beta) (PPAR-beta)	PPARD	Q03181	5467
Cuscutae Semen	MOL005440	Isofucosterol	Squalene monooxygenase (EC 1.14.14.17) (Squalene epoxidase) (SE)	SQLE	Q14534	6713
Cuscutae Semen	MOL005440	Isofucosterol	Tyrosine-protein phosphatase non-receptor type 6 (EC 3.1.3.48) (Hematopoietic cell protein-tyrosine phosphatase) (Protein-tyrosine phosphatase 1C) (PTP-1C) (Protein-tyrosine phosphatase SHP-1) (SH-PTP1)	PTPN6	P29350	5777
Cuscutae Semen	MOL005440	Isofucosterol	Squalene synthase (SQS) (SS) (EC 2.5.1.21) (FPP:FPP farnesyltransferase) (Farnesyl-diphosphate farnesyltransferase) (Farnesyl-diphosphate farnesyltransferase 1)	FDFT1	P37268	2222
Cuscutae Semen	MOL005440	Isofucosterol	Peroxisome proliferator-activated receptor gamma (PPAR-gamma) (Nuclear receptor subfamily 1 group C member 3)	PPARG	P37231	5468
Cuscutae Semen	MOL005440	Isofucosterol	Thromboxane-A synthase (TXA synthase) (TXS) (EC 5.3.99.5) (Cytochrome P450 5A1)	TBXAS1	P24557	6916
Cuscutae Semen	MOL005440	Isofucosterol	UDP-glucuronosyltransferase 2B7 (UDPGT 2B7) (EC 2.4.1.17) (3,4-catechol estrogen-specific UDPGT) (UDP-glucuronosyltransferase 2B9) (UDPGT 2B9) (UDPGTh-2)	UGT2B7	P16662	7364
Cuscutae Semen	MOL005440	Isofucosterol	Prostaglandin E synthase (EC 5.3.99.3) (Microsomal glutathione S-transferase 1-like 1) (MGST1-L1) (Microsomal prostaglandin E synthase 1) (MPGES-1) (p53-induced gene 12 protein)	PTGES	O14684	9536
Cuscutae Semen	MOL005440	Isofucosterol	Sigma non-opioid intracellular receptor 1 (Aging-associated gene 8 protein) (SR31747-binding protein) (SR-BP) (Sigma 1-type opioid receptor) (SIG-1R) (Sigma1-receptor) (Sigma1R) (hSigmaR1)	SIGMAR1	Q99720	10280
Cuscutae Semen	MOL005440	Isofucosterol	DNA polymerase beta (EC 2.7.7.7) (EC 4.2.99.-)	POLB	P06746	5423
Cuscutae Semen	MOL005944	matrine	Neuronal acetylcholine receptor subunit alpha-4	CHRNA4	P43681	1137
Cuscutae Semen	MOL005944	matrine	Neuronal acetylcholine receptor subunit beta-2	CHRNB2	P17787	1141
Cuscutae Semen	MOL005944	matrine	Neuronal acetylcholine receptor subunit alpha-7	CHRNA7	P36544	1139,89832
Cuscutae Semen	MOL005944	matrine	Neuronal acetylcholine receptor subunit alpha-3	CHRNA3	P32297	1136
Cuscutae Semen	MOL005944	matrine	Neuronal acetylcholine receptor subunit beta-4	CHRNB4	P30926	1143
Cuscutae Semen	MOL005944	matrine	Dynamin-1 (EC 3.6.5.5)	DNM1	Q05193	1759
Cuscutae Semen	MOL005944	matrine	Cholinesterase (EC 3.1.1.8) (Acylcholine acylhydrolase) (Butyrylcholine esterase) (Choline esterase II) (Pseudocholinesterase)	BCHE	P06276	590
Cuscutae Semen	MOL005944	matrine	Epoxide hydrolase 1 (EC 3.3.2.9) (Epoxide hydratase) (Microsomal epoxide hydrolase) (mEH)	EPHX1	P07099	2052
Cuscutae Semen	MOL005944	matrine	3-oxo-5-alpha-steroid 4-dehydrogenase 2 (EC 1.3.1.22) (5 alpha-SR2) (SR type 2) (Steroid 5-alpha-reductase 2) (S5AR 2) (Type II 5-alpha reductase)	SRD5A2	P31213	6716
Cuscutae Semen	MOL005944	matrine	3-keto-steroid reductase (EC 1.1.1.270) (17-beta-hydroxysteroid dehydrogenase 7) (17-beta-HSD 7) (Estradiol 17-beta-dehydrogenase 7) (EC 1.1.1.62) (Short chain dehydrogenase/reductase family 37C member 1)	HSD17B7	P56937	51478
Cuscutae Semen	MOL005944	matrine	Corticosteroid 11-beta-dehydrogenase isozyme 1 (EC 1.1.1.146) (11-beta-hydroxysteroid dehydrogenase 1) (11-DH) (11-beta-HSD1) (Short chain dehydrogenase/reductase family 26C member 1)	HSD11B1	P28845	3290
Cuscutae Semen	MOL005944	matrine	N-acylethanolamine-hydrolyzing acid amidase (EC 3.5.1.60) (Acid ceramidase-like protein) (N-acylsphingosine amidohydrolase-like) (ASAH-like protein) [Cleaved into: N-acylethanolamine-hydrolyzing acid amidase subunit alpha; N-acylethanolamine-hydrolyzing acid amidase subunit beta]	NAAA	Q02083	27163
Cuscutae Semen	MOL005944	matrine	Peroxisomal N(1)-acetyl-spermine/spermidine oxidase (EC 1.5.3.13) (Polyamine oxidase)	PAOX	Q6QHF9	196743
Cuscutae Semen	MOL005944	matrine	3-oxo-5-alpha-steroid 4-dehydrogenase 1 (EC 1.3.1.22) (SR type 1) (Steroid 5-alpha-reductase 1) (S5AR 1)	SRD5A1	P18405	6715
Cuscutae Semen	MOL005944	matrine	Metabotropic glutamate receptor 5 (mGluR5)	GRM5	P41594	2915
Cuscutae Semen	MOL005944	matrine	Integrin alpha-IIb (GPalpha IIb) (GPIIb) (Platelet membrane glycoprotein IIb) (CD antigen CD41) [Cleaved into: Integrin alpha-IIb heavy chain; Integrin alpha-IIb light chain, form 1; Integrin alpha-IIb light chain, form 2]	ITGA2B	P08514	3674
Cuscutae Semen	MOL005944	matrine	Integrin beta-3 (Platelet membrane glycoprotein IIIa) (GPIIIa) (CD antigen CD61)	ITGB3	P05106	3690
Cuscutae Semen	MOL005944	matrine	Cathepsin L1 (EC 3.4.22.15) (Cathepsin L) (Major excreted protein) (MEP) [Cleaved into: Cathepsin L1 heavy chain; Cathepsin L1 light chain]	CTSL	P07711	1514
Cuscutae Semen	MOL005944	matrine	Cathepsin B (EC 3.4.22.1) (APP secretase) (APPS) (Cathepsin B1) [Cleaved into: Cathepsin B light chain; Cathepsin B heavy chain]	CTSB	P07858	1508
Cuscutae Semen	MOL005944	matrine	Aminopeptidase B (AP-B) (EC 3.4.11.6) (Arginine aminopeptidase) (Arginyl aminopeptidase)	RNPEP	Q9H4A4	6051
Cuscutae Semen	MOL005944	matrine	Aspartyl aminopeptidase (EC 3.4.11.21)	DNPEP	Q9ULA0	23549
Cuscutae Semen	MOL005944	matrine	Muscarinic acetylcholine receptor M2	CHRM2	P08172	1129
Cuscutae Semen	MOL005944	matrine	Muscarinic acetylcholine receptor M1	CHRM1	P11229	1128
Cuscutae Semen	MOL005944	matrine	Bifunctional epoxide hydrolase 2 [Includes: Cytosolic epoxide hydrolase 2 (CEH) (EC 3.3.2.10) (Epoxide hydratase) (Soluble epoxide hydrolase) (SEH); Lipid-phosphate phosphatase (EC 3.1.3.76)]	EPHX2	P34913	2053
Cuscutae Semen	MOL005944	matrine	Dipeptidyl peptidase 2 (EC 3.4.14.2) (Dipeptidyl aminopeptidase II) (Dipeptidyl peptidase 7) (Dipeptidyl peptidase II) (DPP II) (Quiescent cell proline dipeptidase)	DPP7	Q9UHL4	29952
Cuscutae Semen	MOL005944	matrine	Poly [ADP-ribose] polymerase 1 (PARP-1) (EC 2.4.2.30) (ADP-ribosyltransferase diphtheria toxin-like 1) (ARTD1) (DNA ADP-ribosyltransferase PARP1) (EC 2.4.2.-) (NAD(+) ADP-ribosyltransferase 1) (ADPRT 1) (Poly[ADP-ribose] synthase 1) (Protein poly-ADP-ribosyltransferase PARP1) (EC 2.4.2.-)	PARP1	P09874	142
Cuscutae Semen	MOL005944	matrine	Sigma non-opioid intracellular receptor 1 (Aging-associated gene 8 protein) (SR31747-binding protein) (SR-BP) (Sigma 1-type opioid receptor) (SIG-1R) (Sigma1-receptor) (Sigma1R) (hSigmaR1)	SIGMAR1	Q99720	10280
Cuscutae Semen	MOL005944	matrine	5-hydroxytryptamine receptor 3A (5-HT3-A) (5-HT3A) (5-hydroxytryptamine receptor 3) (5-HT-3) (5-HT3R) (Serotonin receptor 3A) (Serotonin-gated ion channel receptor)	HTR3A	P46098	3359
Cuscutae Semen	MOL005944	matrine	5-hydroxytryptamine receptor 1B (5-HT-1B) (5-HT1B) (S12) (Serotonin 1D beta receptor) (5-HT-1D-beta) (Serotonin receptor 1B)	HTR1B	P28222	3351
Cuscutae Semen	MOL005944	matrine	5-hydroxytryptamine receptor 1D (5-HT-1D) (5-HT1D) (Serotonin 1D alpha receptor) (5-HT-1D-alpha) (Serotonin receptor 1D)	HTR1D	P28221	3352
Cuscutae Semen	MOL005944	matrine	Dipeptidyl peptidase 4 (EC 3.4.14.5) (ADABP) (Adenosine deaminase complexing protein 2) (ADCP-2) (Dipeptidyl peptidase IV) (DPP IV) (T-cell activation antigen CD26) (TP103) (CD antigen CD26) [Cleaved into: Dipeptidyl peptidase 4 membrane form (Dipeptidyl peptidase IV membrane form); Dipeptidyl peptidase 4 soluble form (Dipeptidyl peptidase IV soluble form)]	DPP4	P27487	1803
Cuscutae Semen	MOL005944	matrine	Sodium-dependent dopamine transporter (DA transporter) (DAT) (Solute carrier family 6 member 3)	SLC6A3	Q01959	6531
Cuscutae Semen	MOL005944	matrine	Neuronal acetylcholine receptor subunit alpha-4	CHRNA4	P43681	1137
Cuscutae Semen	MOL005944	matrine	Dipeptidyl peptidase 8 (DP8) (EC 3.4.14.5) (Dipeptidyl peptidase IV-related protein 1) (DPRP-1) (Dipeptidyl peptidase VIII) (DPP VIII) (Prolyl dipeptidase DPP8)	DPP8	Q6V1X1	54878
Cuscutae Semen	MOL005944	matrine	Dipeptidyl peptidase 9 (DP9) (EC 3.4.14.5) (Dipeptidyl peptidase IV-related protein 2) (DPRP-2) (Dipeptidyl peptidase IX) (DPP IX) (Dipeptidyl peptidase-like protein 9) (DPLP9)	DPP9	Q86TI2	91039
Cuscutae Semen	MOL005944	matrine	Fatty-acid amide hydrolase 1 (EC 3.5.1.99) (Anandamide amidohydrolase 1) (Fatty acid ester hydrolase) (EC 3.1.1.-) (Oleamide hydrolase 1)	FAAH	O00519	2166
Cuscutae Semen	MOL005944	matrine	Muscarinic acetylcholine receptor M4	CHRM4	P08173	1132
Cuscutae Semen	MOL005944	matrine	Muscarinic acetylcholine receptor M5	CHRM5	P08912	1133
Cuscutae Semen	MOL005944	matrine	Muscarinic acetylcholine receptor M3	CHRM3	P20309	1131
Cuscutae Semen	MOL005944	matrine	Histone deacetylase 3 (HD3) (EC 3.5.1.98) (RPD3-2) (SMAP45)	HDAC3	O15379	8841
Cuscutae Semen	MOL005944	matrine	Histone deacetylase 6 (HD6) (EC 3.5.1.98) (Tubulin-lysine deacetylase HDAC6) (EC 3.5.1.-)	HDAC6	Q9UBN7	10013
Cuscutae Semen	MOL005944	matrine	Histone deacetylase 2 (HD2) (EC 3.5.1.98)	HDAC2	Q92769	3066
Cuscutae Semen	MOL005944	matrine	Nuclear receptor corepressor 2 (N-CoR2) (CTG repeat protein 26) (SMAP270) (Silencing mediator of retinoic acid and thyroid hormone receptor) (SMRT) (T3 receptor-associating factor) (TRAC) (Thyroid-, retinoic-acid-receptor-associated corepressor)	NCOR2	Q9Y618	9612
Cuscutae Semen	MOL005944	matrine	Histone deacetylase 3 (HD3) (EC 3.5.1.98) (RPD3-2) (SMAP45)	HDAC3	O15379	8841
Cuscutae Semen	MOL005944	matrine	Methionine aminopeptidase 1 (MAP 1) (MetAP 1) (EC 3.4.11.18) (Peptidase M 1)	METAP1	P53582	23173
Cuscutae Semen	MOL005944	matrine	Histone deacetylase 8 (HD8) (EC 3.5.1.98)	HDAC8	Q9BY41	55869
Cuscutae Semen	MOL005944	matrine	Histone deacetylase 11 (HD11) (EC 3.5.1.98)	HDAC11	Q96DB2	79885
Cuscutae Semen	MOL005944	matrine	Polyamine deacetylase HDAC10 (EC 3.5.1.48) (EC 3.5.1.62) (Histone deacetylase 10) (HD10)	HDAC10	Q969S8	83933
Cuscutae Semen	MOL005944	matrine	D(1A) dopamine receptor (Dopamine D1 receptor)	DRD1	P21728	1812
Cuscutae Semen	MOL005944	matrine	Neutrophil collagenase (EC 3.4.24.34) (Matrix metalloproteinase-8) (MMP-8) (PMNL collagenase) (PMNL-CL)	MMP8	P22894	4317
Cuscutae Semen	MOL005944	matrine	Alcohol dehydrogenase 1A (EC 1.1.1.1) (Alcohol dehydrogenase subunit alpha)	ADH1A	P07327	124
Cuscutae Semen	MOL005944	matrine	Alcohol dehydrogenase 1C (EC 1.1.1.1) (Alcohol dehydrogenase subunit gamma)	ADH1C	P00326	126
Cuscutae Semen	MOL005944	matrine	Scavenger receptor class B member 1 (SRB1) (CD36 and LIMPII analogous 1) (CLA-1) (CD36 antigen-like 1) (Collagen type I receptor, thrombospondin receptor-like 1) (SR-BI) (CD antigen CD36)	SCARB1	Q8WTV0	949
Cuscutae Semen	MOL005944	matrine	Cathepsin K (EC 3.4.22.38) (Cathepsin O) (Cathepsin O2) (Cathepsin X)	CTSK	P43235	1513
Cuscutae Semen	MOL005944	matrine	Neprilysin (EC 3.4.24.11) (Atriopeptidase) (Common acute lymphocytic leukemia antigen) (CALLA) (Enkephalinase) (Neutral endopeptidase 24.11) (NEP) (Neutral endopeptidase) (Skin fibroblast elastase) (SFE) (CD antigen CD10)	MME	P08473	4311
Cuscutae Semen	MOL005944	matrine	Protein arginine N-methyltransferase 3 (EC 2.1.1.-) (Heterogeneous nuclear ribonucleoprotein methyltransferase-like protein 3)	PRMT3	O60678	10196
Cuscutae Semen	MOL005944	matrine	Solute carrier family 22 member 2 (Organic cation transporter 2) (hOCT2)	SLC22A2	O15244	6582
Cuscutae Semen	MOL005944	matrine	Multidrug and toxin extrusion protein 1 (MATE-1) (hMATE-1) (Solute carrier family 47 member 1)	SLC47A1	Q96FL8	55244
Cuscutae Semen	MOL005944	matrine	5-hydroxytryptamine receptor 3B (5-HT3-B) (5-HT3B) (Serotonin receptor 3B)	HTR3B	O95264	9177
Cuscutae Semen	MOL005944	matrine	5-hydroxytryptamine receptor 3A (5-HT3-A) (5-HT3A) (5-hydroxytryptamine receptor 3) (5-HT-3) (5-HT3R) (Serotonin receptor 3A) (Serotonin-gated ion channel receptor)	HTR3A	P46098	3359
Cuscutae Semen	MOL006649	sophranol	Neuronal acetylcholine receptor subunit alpha-4	CHRNA4	P43681	1137
Cuscutae Semen	MOL006649	sophranol	Neuronal acetylcholine receptor subunit beta-2	CHRNB2	P17787	1141
Cuscutae Semen	MOL006649	sophranol	Neuronal acetylcholine receptor subunit alpha-7	CHRNA7	P36544	1139,89832
Cuscutae Semen	MOL006649	sophranol	Aspartyl aminopeptidase (EC 3.4.11.21)	DNPEP	Q9ULA0	23549
Cuscutae Semen	MOL006649	sophranol	Testosterone 17-beta-dehydrogenase 3 (EC 1.1.1.64) (17-beta-hydroxysteroid dehydrogenase type 3) (17-beta-HSD 3) (Short chain dehydrogenase/reductase family 12C member 2) (Testicular 17-beta-hydroxysteroid dehydrogenase)	HSD17B3	P37058	3293
Cuscutae Semen	MOL006649	sophranol	Neprilysin (EC 3.4.24.11) (Atriopeptidase) (Common acute lymphocytic leukemia antigen) (CALLA) (Enkephalinase) (Neutral endopeptidase 24.11) (NEP) (Neutral endopeptidase) (Skin fibroblast elastase) (SFE) (CD antigen CD10)	MME	P08473	4311
Cuscutae Semen	MOL006649	sophranol	Protein kinase C alpha type (PKC-A) (PKC-alpha) (EC 2.7.11.13)	PRKCA	P17252	5578
Cuscutae Semen	MOL006649	sophranol	Tissue alpha-L-fucosidase (EC 3.2.1.51) (Alpha-L-fucosidase I) (Alpha-L-fucoside fucohydrolase 1) (Alpha-L-fucosidase 1)	FUCA1	P04066	2517
Cuscutae Semen	MOL006649	sophranol	Neuronal acetylcholine receptor subunit alpha-3	CHRNA3	P32297	1136
Cuscutae Semen	MOL006649	sophranol	Neuronal acetylcholine receptor subunit beta-4	CHRNB4	P30926	1143
Cuscutae Semen	MOL006649	sophranol	Corticosteroid 11-beta-dehydrogenase isozyme 1 (EC 1.1.1.146) (11-beta-hydroxysteroid dehydrogenase 1) (11-DH) (11-beta-HSD1) (Short chain dehydrogenase/reductase family 26C member 1)	HSD11B1	P28845	3290
Cuscutae Semen	MOL006649	sophranol	Cholinesterase (EC 3.1.1.8) (Acylcholine acylhydrolase) (Butyrylcholine esterase) (Choline esterase II) (Pseudocholinesterase)	BCHE	P06276	590
Cuscutae Semen	MOL006649	sophranol	Renin (EC 3.4.23.15) (Angiotensinogenase)	REN	P00797	5972
Cuscutae Semen	MOL006649	sophranol	Neuronal acetylcholine receptor subunit alpha-5	CHRNA5	P30532	1138
Cuscutae Semen	MOL006649	sophranol	Neuronal acetylcholine receptor subunit beta-2	CHRNB2	P17787	1141
Cuscutae Semen	MOL006649	sophranol	Neuronal acetylcholine receptor subunit alpha-4	CHRNA4	P43681	1137
Cuscutae Semen	MOL006649	sophranol	Neuronal acetylcholine receptor subunit beta-4	CHRNB4	P30926	1143
Cuscutae Semen	MOL006649	sophranol	Neuronal acetylcholine receptor subunit alpha-2	CHRNA2	Q15822	1135
Cuscutae Semen	MOL006649	sophranol	Neuronal acetylcholine receptor subunit alpha-3	CHRNA3	P32297	1136
Cuscutae Semen	MOL006649	sophranol	Neuronal acetylcholine receptor subunit beta-2	CHRNB2	P17787	1141
Cuscutae Semen	MOL006649	sophranol	Integrin alpha-IIb (GPalpha IIb) (GPIIb) (Platelet membrane glycoprotein IIb) (CD antigen CD41) [Cleaved into: Integrin alpha-IIb heavy chain; Integrin alpha-IIb light chain, form 1; Integrin alpha-IIb light chain, form 2]	ITGA2B	P08514	3674
Cuscutae Semen	MOL006649	sophranol	Integrin beta-3 (Platelet membrane glycoprotein IIIa) (GPIIIa) (CD antigen CD61)	ITGB3	P05106	3690
Cuscutae Semen	MOL006649	sophranol	Sodium channel protein type 5 subunit alpha (HH1) (Sodium channel protein cardiac muscle subunit alpha) (Sodium channel protein type V subunit alpha) (Voltage-gated sodium channel subunit alpha Nav1.5)	SCN5A	Q14524	6331
Cuscutae Semen	MOL006649	sophranol	Potassium voltage-gated channel subfamily H member 2 (Eag homolog) (Ether-a-go-go-related gene potassium channel 1) (ERG-1) (Eag-related protein 1) (Ether-a-go-go-related protein 1) (H-ERG) (hERG-1) (hERG1) (Voltage-gated potassium channel subunit Kv11.1)	KCNH2	Q12809	3757
Cuscutae Semen	MOL006649	sophranol	ATP-dependent translocase ABCB1 (ATP-binding cassette sub-family B member 1) (Multidrug resistance protein 1) (EC 7.6.2.2) (P-glycoprotein 1) (Phospholipid transporter ABCB1) (EC 7.6.2.1) (CD antigen CD243)	ABCB1	P08183	5243
Cuscutae Semen	MOL006649	sophranol	Potassium voltage-gated channel subfamily A member 5 (HPCN1) (Voltage-gated potassium channel HK2) (Voltage-gated potassium channel subunit Kv1.5)	KCNA5	P22460	3741
Cuscutae Semen	MOL006649	sophranol	Ceramide glucosyltransferase (EC 2.4.1.80) (GLCT-1) (Glucosylceramide synthase) (GCS) (UDP-glucose ceramide glucosyltransferase) (UDP-glucose:N-acylsphingosine D-glucosyltransferase)	UGCG	Q16739	7357
Cuscutae Semen	MOL006649	sophranol	Lysosomal acid glucosylceramidase (Lysosomal acid GCase) (EC 3.2.1.45) (Acid beta-glucosidase) (Alglucerase) (Beta-glucocerebrosidase) (Beta-GC) (Cholesterol glucosyltransferase) (SGTase) (EC 2.4.1.-) (Cholesteryl-beta-glucosidase) (EC 3.2.1.104) (D-glucosyl-N-acylsphingosine glucohydrolase) (Imiglucerase)	GBA	P04062	2629
Cuscutae Semen	MOL006649	sophranol	Non-lysosomal glucosylceramidase (NLGase) (EC 3.2.1.45) (Beta-glucocerebrosidase 2) (Beta-glucosidase 2) (Bile acid beta-glucosidase GBA2) (Bile acid glucosyl transferase GBA2) (Cholesterol glucosyltransferase GBA2) (EC 2.4.1.-) (Cholesteryl-beta-glucosidase GBA2) (EC 3.2.1.104) (Glucosylceramidase 2)	GBA2	Q9HCG7	57704
Cuscutae Semen	MOL006649	sophranol	Alpha-1A adrenergic receptor (Alpha-1A adrenoreceptor) (Alpha-1A adrenoceptor) (Alpha-1C adrenergic receptor) (Alpha-adrenergic receptor 1c)	ADRA1A	P35348	148
Cuscutae Semen	MOL006649	sophranol	Aminopeptidase B (AP-B) (EC 3.4.11.6) (Arginine aminopeptidase) (Arginyl aminopeptidase)	RNPEP	Q9H4A4	6051
Cuscutae Semen	MOL006649	sophranol	Putative inactive group IIC secretory phospholipase A2 (Phosphatidylcholine 2-acylhydrolase-like protein GIIC)	PLA2G2C	Q5R387	1803
Cuscutae Semen	MOL006649	sophranol	Group 10 secretory phospholipase A2 (EC 3.1.1.4) (Group X secretory phospholipase A2) (GX sPLA2) (sPLA2-X) (Phosphatidylcholine 2-acylhydrolase 10)	PLA2G10	O15496	8399
Cuscutae Semen	MOL006649	sophranol	Sodium-dependent noradrenaline transporter (Norepinephrine transporter) (NET) (Solute carrier family 6 member 2)	SLC6A2	P23975	6530
Cuscutae Semen	MOL006649	sophranol	Sodium-dependent serotonin transporter (SERT) (5HT transporter) (5HTT) (Solute carrier family 6 member 4)	SLC6A4	P31645	6532
Cuscutae Semen	MOL006649	sophranol	Lanosterol 14-alpha demethylase (LDM) (EC 1.14.14.154) (CYPLI) (Cytochrome P450 51A1) (Cytochrome P450-14DM) (Cytochrome P45014DM) (Cytochrome P450LI) (Sterol 14-alpha demethylase)	CYP51A1	Q16850	1595
Cuscutae Semen	MOL006649	sophranol	Metabotropic glutamate receptor 3 (mGluR3)	GRM3	Q14832	2913
Cuscutae Semen	MOL006649	sophranol	Metabotropic glutamate receptor 8 (mGluR8)	GRM8	O00222	2918
Cuscutae Semen	MOL006649	sophranol	Metabotropic glutamate receptor 6 (mGluR6)	GRM6	O15303	2916
Cuscutae Semen	MOL006649	sophranol	Metabotropic glutamate receptor 2 (mGluR2)	GRM2	Q14416	2912
Cuscutae Semen	MOL006649	sophranol	Dipeptidyl peptidase 4 (EC 3.4.14.5) (ADABP) (Adenosine deaminase complexing protein 2) (ADCP-2) (Dipeptidyl peptidase IV) (DPP IV) (T-cell activation antigen CD26) (TP103) (CD antigen CD26) [Cleaved into: Dipeptidyl peptidase 4 membrane form (Dipeptidyl peptidase IV membrane form); Dipeptidyl peptidase 4 soluble form (Dipeptidyl peptidase IV soluble form)]	DPP4	P27487	1803
Cuscutae Semen	MOL006649	sophranol	D(3) dopamine receptor (Dopamine D3 receptor)	DRD3	P35462	1814
Cuscutae Semen	MOL006649	sophranol	D(1A) dopamine receptor (Dopamine D1 receptor)	DRD1	P21728	1812
Cuscutae Semen	MOL006649	sophranol	5-hydroxytryptamine receptor 1A (5-HT-1A) (5-HT1A) (G-21) (Serotonin receptor 1A)	HTR1A	P08908	3350
Cuscutae Semen	MOL006649	sophranol	D(4) dopamine receptor (D(2C) dopamine receptor) (Dopamine D4 receptor)	DRD4	P21917	1815
Cuscutae Semen	MOL006649	sophranol	Prostaglandin E2 receptor EP4 subtype (PGE receptor EP4 subtype) (PGE2 receptor EP4 subtype) (Prostanoid EP4 receptor)	PTGER4	P35408	5734
Cuscutae Semen	MOL006649	sophranol	Prostaglandin E2 receptor EP2 subtype (PGE receptor EP2 subtype) (PGE2 receptor EP2 subtype) (Prostanoid EP2 receptor)	PTGER2	P43116	5732
Cuscutae Semen	MOL006649	sophranol	5-hydroxytryptamine receptor 3A (5-HT3-A) (5-HT3A) (5-hydroxytryptamine receptor 3) (5-HT-3) (5-HT3R) (Serotonin receptor 3A) (Serotonin-gated ion channel receptor)	HTR3A	P46098	3359
Cuscutae Semen	MOL006649	sophranol	Androgen receptor (Dihydrotestosterone receptor) (Nuclear receptor subfamily 3 group C member 4)	AR	P10275	367
Cuscutae Semen	MOL006649	sophranol	Beta-secretase 1 (EC 3.4.23.46) (Aspartyl protease 2) (ASP2) (Asp 2) (Beta-site amyloid precursor protein cleaving enzyme 1) (Beta-site APP cleaving enzyme 1) (Memapsin-2) (Membrane-associated aspartic protease 2)	BACE1	P56817	23621
Cuscutae Semen	MOL006649	sophranol	Rho-associated protein kinase 2 (EC 2.7.11.1) (Rho kinase 2) (Rho-associated, coiled-coil-containing protein kinase 2) (Rho-associated, coiled-coil-containing protein kinase II) (ROCK-II) (p164 ROCK-2)	ROCK2	O75116	9475
Cuscutae Semen	MOL006649	sophranol	Rho-associated protein kinase 1 (EC 2.7.11.1) (Renal carcinoma antigen NY-REN-35) (Rho-associated, coiled-coil-containing protein kinase 1) (Rho-associated, coiled-coil-containing protein kinase I) (ROCK-I) (p160 ROCK-1) (p160ROCK)	ROCK1	Q13464	6093
Cuscutae Semen	MOL006649	sophranol	Tyrosine-protein kinase JAK1 (EC 2.7.10.2) (Janus kinase 1) (JAK-1)	JAK1	P23458	3716
Cuscutae Semen	MOL006649	sophranol	Urotensin-2 receptor (UR-2-R) (G-protein coupled receptor 14) (Urotensin II receptor) (UR-II-R)	UTS2R	Q9UKP6	2837
Cuscutae Semen	MOL006649	sophranol	Neuronal acetylcholine receptor subunit beta-3	CHRNB3	Q05901	1142
Cuscutae Semen	MOL006649	sophranol	Neuronal acetylcholine receptor subunit alpha-6	CHRNA6	Q15825	8973
Cuscutae Semen	MOL006649	sophranol	Neuronal acetylcholine receptor subunit beta-2	CHRNB2	P17787	1141
Cuscutae Semen	MOL006649	sophranol	Neuronal acetylcholine receptor subunit alpha-3	CHRNA3	P32297	1136
Cuscutae Semen	MOL006649	sophranol	cAMP and cAMP-inhibited cGMP 3',5'-cyclic phosphodiesterase 10A (EC 3.1.4.17) (EC 3.1.4.35)	PDE10A	Q9Y233	10846
Cuscutae Semen	MOL006649	sophranol	Dynamin-1 (EC 3.6.5.5)	DNM1	Q05193	1759
Cuscutae Semen	MOL006649	sophranol	Beta-2 adrenergic receptor (Beta-2 adrenoreceptor) (Beta-2 adrenoceptor)	ADRB2	P07550	154
Cuscutae Semen	MOL006649	sophranol	Phospholipase A2 group V (EC 3.1.1.4) (PLA2-10) (Phosphatidylcholine 2-acylhydrolase 5)	PLA2G5	P39877	5322
Cuscutae Semen	MOL006649	sophranol	Poly [ADP-ribose] polymerase 1 (PARP-1) (EC 2.4.2.30) (ADP-ribosyltransferase diphtheria toxin-like 1) (ARTD1) (DNA ADP-ribosyltransferase PARP1) (EC 2.4.2.-) (NAD(+) ADP-ribosyltransferase 1) (ADPRT 1) (Poly[ADP-ribose] synthase 1) (Protein poly-ADP-ribosyltransferase PARP1) (EC 2.4.2.-)	PARP1	P09874	142
Cuscutae Semen	MOL006649	sophranol	ALK tyrosine kinase receptor (EC 2.7.10.1) (Anaplastic lymphoma kinase) (CD antigen CD246)	ALK	Q9UM73	238
Cuscutae Semen	MOL006649	sophranol	Dipeptidyl peptidase 1 (EC 3.4.14.1) (Cathepsin C) (Cathepsin J) (Dipeptidyl peptidase I) (DPP-I) (DPPI) (Dipeptidyl transferase) [Cleaved into: Dipeptidyl peptidase 1 exclusion domain chain (Dipeptidyl peptidase I exclusion domain chain); Dipeptidyl peptidase 1 heavy chain (Dipeptidyl peptidase I heavy chain); Dipeptidyl peptidase 1 light chain (Dipeptidyl peptidase I light chain)]	CTSC	P53634	1075
Cuscutae Semen	MOL006649	sophranol	Bromodomain adjacent to zinc finger domain protein 2B (hWALp4)	BAZ2B	Q9UIF8	29994
Cuscutae Semen	MOL006649	sophranol	Bromodomain adjacent to zinc finger domain protein 2A (Transcription termination factor I-interacting protein 5) (TTF-I-interacting protein 5) (Tip5) (hWALp3)	BAZ2A	Q9UIF9	11176
Cuscutae Semen	MOL006649	sophranol	Sodium- and chloride-dependent glycine transporter 1 (GlyT-1) (GlyT1) (Solute carrier family 6 member 9)	SLC6A9	P48067	6536
Cuscutae Semen	MOL006649	sophranol	Substance-P receptor (SPR) (NK-1 receptor) (NK-1R) (Tachykinin receptor 1)	TACR1	P25103	6869
Cuscutae Semen	MOL006649	sophranol	Vesicular acetylcholine transporter (VAChT) (Solute carrier family 18 member 3)	SLC18A3	Q16572	6572
Cuscutae Semen	MOL006649	sophranol	Tyrosine-protein kinase JAK3 (EC 2.7.10.2) (Janus kinase 3) (JAK-3) (Leukocyte janus kinase) (L-JAK)	JAK3	P52333	3718
Cuscutae Semen	MOL006649	sophranol	Tyrosine-protein kinase JAK2 (EC 2.7.10.2) (Janus kinase 2) (JAK-2)	JAK2	O60674	3717
Cuscutae Semen	MOL006649	sophranol	Non-receptor tyrosine-protein kinase TYK2 (EC 2.7.10.2)	TYK2	P29597	7297
Cuscutae Semen	MOL006649	sophranol	Gastricsin (EC 3.4.23.3) (Pepsinogen C)	PGC	P20142	5225
Cuscutae Semen	MOL006649	sophranol	Aromatase (EC 1.14.14.14) (CYPXIX) (Cytochrome P-450AROM) (Cytochrome P450 19A1) (Estrogen synthase)	CYP19A1	P11511	1588
Cuscutae Semen	MOL006649	sophranol	Angiotensin-converting enzyme (ACE) (EC 3.2.1.-) (EC 3.4.15.1) (Dipeptidyl carboxypeptidase I) (Kininase II) (CD antigen CD143) [Cleaved into: Angiotensin-converting enzyme, soluble form]	ACE	P12821	1636
Cuscutae Semen	MOL006649	sophranol	Cathepsin D (EC 3.4.23.5) [Cleaved into: Cathepsin D light chain; Cathepsin D heavy chain]	CTSD	P07339	1509
Cuscutae Semen	MOL006649	sophranol	3-oxo-5-alpha-steroid 4-dehydrogenase 2 (EC 1.3.1.22) (5 alpha-SR2) (SR type 2) (Steroid 5-alpha-reductase 2) (S5AR 2) (Type II 5-alpha reductase)	SRD5A2	P31213	6716
Cuscutae Semen	MOL006649	sophranol	5-hydroxytryptamine receptor 2C (5-HT-2C) (5-HT2C) (5-HTR2C) (5-hydroxytryptamine receptor 1C) (5-HT-1C) (5-HT1C) (Serotonin receptor 2C)	HTR2C	P28335	3358
Cuscutae Semen	MOL006649	sophranol	Histamine H1 receptor (H1R) (HH1R)	HRH1	P35367	3269
Cuscutae Semen	MOL006649	sophranol	cGMP-specific 3',5'-cyclic phosphodiesterase (EC 3.1.4.35) (cGMP-binding cGMP-specific phosphodiesterase) (CGB-PDE)	PDE5A	O76074	8654
Cuscutae Semen	MOL006649	sophranol	5-hydroxytryptamine receptor 2B (5-HT-2B) (5-HT2B) (Serotonin receptor 2B)	HTR2B	P41595	3357
Cuscutae Semen	MOL006649	sophranol	Dual 3',5'-cyclic-AMP and -GMP phosphodiesterase 11A (EC 3.1.4.35) (EC 3.1.4.53) (cAMP and cGMP phosphodiesterase 11A)	PDE11A	Q9HCR9	50940
Cuscutae Semen	MOL006649	sophranol	Cytochrome P450 2D6 (EC 1.14.14.-) (CYPIID6) (Cholesterol 25-hydroxylase) (Cytochrome P450-DB1) (Debrisoquine 4-hydroxylase)	CYP2D6	P10635	1565
Cuscutae Semen	MOL006649	sophranol	Cytosol aminopeptidase (EC 3.4.11.1) (Leucine aminopeptidase 3) (LAP-3) (Leucyl aminopeptidase) (Peptidase S) (Proline aminopeptidase) (EC 3.4.11.5) (Prolyl aminopeptidase)	LAP3	P28838	51056
Cuscutae Semen	MOL006649	sophranol	Rho-associated protein kinase 2 (EC 2.7.11.1) (Rho kinase 2) (Rho-associated, coiled-coil-containing protein kinase 2) (Rho-associated, coiled-coil-containing protein kinase II) (ROCK-II) (p164 ROCK-2)	ROCK2	O75116	9475
Cuscutae Semen	MOL006649	sophranol	Histamine H4 receptor (H4R) (HH4R) (AXOR35) (G-protein coupled receptor 105) (GPRv53) (Pfi-013) (SP9144)	HRH4	Q9H3N8	59340
Cuscutae Semen	MOL009303	Cuscutoside B	Adenosine receptor A1	ADORA1	P30542	134
Cuscutae Semen	MOL009303	Cuscutoside B	Carbonic anhydrase 14 (EC 4.2.1.1) (Carbonate dehydratase XIV) (Carbonic anhydrase XIV) (CA-XIV)	CA14	Q9ULX7	23632
Cuscutae Semen	MOL009303	Cuscutoside B	Tyrosinase (EC 1.14.18.1) (LB24-AB) (Monophenol monooxygenase) (SK29-AB) (Tumor rejection antigen AB)	TYR	P14679	7299
Cuscutae Semen	MOL009303	Cuscutoside B	Galectin-4 (Gal-4) (Antigen NY-CO-27) (L-36 lactose-binding protein) (L36LBP) (Lactose-binding lectin 4)	LGALS4	P56470	3960
Cuscutae Semen	MOL009303	Cuscutoside B	Galectin-3 (Gal-3) (35 kDa lectin) (Carbohydrate-binding protein 35) (CBP 35) (Galactose-specific lectin 3) (Galactoside-binding protein) (GALBP) (IgE-binding protein) (L-31) (Laminin-binding protein) (Lectin L-29) (Mac-2 antigen)	LGALS3	P17931	3958
Cuscutae Semen	MOL009303	Cuscutoside B	Galectin-8 (Gal-8) (Po66 carbohydrate-binding protein) (Po66-CBP) (Prostate carcinoma tumor antigen 1) (PCTA-1)	LGALS8	O00214	3964
Cuscutae Semen	MOL009303	Cuscutoside B	Adenosine receptor A2a	ADORA2A	P29274	135
Cuscutae Semen	MOL009303	Cuscutoside B	Adenosine receptor A2b	ADORA2B	P29275	136
Cuscutae Semen	MOL009303	Cuscutoside B	Adenosine receptor A3	ADORA3	P0DMS8	140
Cuscutae Semen	MOL009303	Cuscutoside B	Bifunctional epoxide hydrolase 2 [Includes: Cytosolic epoxide hydrolase 2 (CEH) (EC 3.3.2.10) (Epoxide hydratase) (Soluble epoxide hydrolase) (SEH); Lipid-phosphate phosphatase (EC 3.1.3.76)]	EPHX2	P34913	2053
Cuscutae Semen	MOL009303	Cuscutoside B	Aromatase (EC 1.14.14.14) (CYPXIX) (Cytochrome P-450AROM) (Cytochrome P450 19A1) (Estrogen synthase)	CYP19A1	P11511	1588
Cuscutae Semen	MOL009303	Cuscutoside B	Acidic mammalian chitinase (AMCase) (EC 3.2.1.14) (Lung-specific protein TSA1902)	CHIA	Q9BZP6	27159
Cuscutae Semen	MOL009303	Cuscutoside B	Galectin-9 (Gal-9) (Ecalectin) (Tumor antigen HOM-HD-21)	LGALS9	O00182	3965
Cuscutae Semen	MOL009303	Cuscutoside B	Equilibrative nucleoside transporter 1 (Equilibrative nitrobenzylmercaptopurine riboside-sensitive nucleoside transporter) (Equilibrative NBMPR-sensitive nucleoside transporter) (Nucleoside transporter, es-type) (Solute carrier family 29 member 1)	SLC29A1	Q99808	2030
Cuscutae Semen	MOL009303	Cuscutoside B	Sodium/glucose cotransporter 2 (Na(+)/glucose cotransporter 2) (Low affinity sodium-glucose cotransporter) (Solute carrier family 5 member 2)	SLC5A2	P31639	6524
Cuscutae Semen	MOL009303	Cuscutoside B	cGMP-specific 3',5'-cyclic phosphodiesterase (EC 3.1.4.35) (cGMP-binding cGMP-specific phosphodiesterase) (CGB-PDE)	PDE5A	O76074	8654
Cuscutae Semen	MOL009303	Cuscutoside B	Inosine-5'-monophosphate dehydrogenase 1 (IMP dehydrogenase 1) (IMPD 1) (IMPDH 1) (EC 1.1.1.205) (IMPDH-I)	IMPDH1	P20839	3614
Cuscutae Semen	MOL009303	Cuscutoside B	Neprilysin (EC 3.4.24.11) (Atriopeptidase) (Common acute lymphocytic leukemia antigen) (CALLA) (Enkephalinase) (Neutral endopeptidase 24.11) (NEP) (Neutral endopeptidase) (Skin fibroblast elastase) (SFE) (CD antigen CD10)	MME	P08473	4311
Cuscutae Semen	MOL009303	Cuscutoside B	Interstitial collagenase (EC 3.4.24.7) (Fibroblast collagenase) (Matrix metalloproteinase-1) (MMP-1) [Cleaved into: 22 kDa interstitial collagenase; 27 kDa interstitial collagenase]	MMP1	P03956	4312
Cuscutae Semen	MOL009303	Cuscutoside B	Matrilysin (EC 3.4.24.23) (Matrin) (Matrix metalloproteinase-7) (MMP-7) (Pump-1 protease) (Uterine metalloproteinase)	MMP7	P09237	4316
Cuscutae Semen	MOL009303	Cuscutoside B	Neutrophil collagenase (EC 3.4.24.34) (Matrix metalloproteinase-8) (MMP-8) (PMNL collagenase) (PMNL-CL)	MMP8	P22894	4317
Cuscutae Semen	MOL009303	Cuscutoside B	Endothelin-converting enzyme 1 (ECE-1) (EC 3.4.24.71)	ECE1	P42892	1889
Cuscutae Semen	MOL009303	Cuscutoside B	Interleukin-2 (IL-2) (T-cell growth factor) (TCGF) (Aldesleukin)	IL2	P60568	3558
Cuscutae Semen	MOL009303	Cuscutoside B	Sodium/glucose cotransporter 1 (Na(+)/glucose cotransporter 1) (High affinity sodium-glucose cotransporter) (Solute carrier family 5 member 1)	SLC5A1	P13866	6523
Cuscutae Semen	MOL005438	campesterol	Androgen receptor (Dihydrotestosterone receptor) (Nuclear receptor subfamily 3 group C member 4)	AR	P10275	367
Cuscutae Semen	MOL005438	campesterol	Oxysterols receptor LXR-alpha (Liver X receptor alpha) (Nuclear receptor subfamily 1 group H member 3)	NR1H3	Q13133	10062
Cuscutae Semen	MOL005438	campesterol	3-hydroxy-3-methylglutaryl-coenzyme A reductase (HMG-CoA reductase) (EC 1.1.1.34)	HMGCR	P04035	3156
Cuscutae Semen	MOL005438	campesterol	Lanosterol 14-alpha demethylase (LDM) (EC 1.14.14.154) (CYPLI) (Cytochrome P450 51A1) (Cytochrome P450-14DM) (Cytochrome P45014DM) (Cytochrome P450LI) (Sterol 14-alpha demethylase)	CYP51A1	Q16850	1595
Cuscutae Semen	MOL005438	campesterol	NPC1-like intracellular cholesterol transporter 1 (Niemann-Pick C1-like protein 1)	NPC1L1	Q9UHC9	29881
Cuscutae Semen	MOL005438	campesterol	Steroid 17-alpha-hydroxylase/17,20 lyase (EC 1.14.14.19) (17-alpha-hydroxyprogesterone aldolase) (EC 1.14.14.32) (CYPXVII) (Cytochrome P450 17A1) (Cytochrome P450-C17) (Cytochrome P450c17) (Steroid 17-alpha-monooxygenase)	CYP17A1	P05093	1586
Cuscutae Semen	MOL005438	campesterol	Nuclear receptor ROR-gamma (Nuclear receptor RZR-gamma) (Nuclear receptor subfamily 1 group F member 3) (RAR-related orphan receptor C) (Retinoid-related orphan receptor-gamma)	RORC	P51449	6097
Cuscutae Semen	MOL005438	campesterol	Aromatase (EC 1.14.14.14) (CYPXIX) (Cytochrome P-450AROM) (Cytochrome P450 19A1) (Estrogen synthase)	CYP19A1	P11511	1588
Cuscutae Semen	MOL005438	campesterol	Estrogen receptor (ER) (ER-alpha) (Estradiol receptor) (Nuclear receptor subfamily 3 group A member 1)	ESR1	P03372	2099
Cuscutae Semen	MOL005438	campesterol	Sex hormone-binding globulin (SHBG) (Sex steroid-binding protein) (SBP) (Testis-specific androgen-binding protein) (ABP) (Testosterone-estradiol-binding globulin) (TeBG) (Testosterone-estrogen-binding globulin)	SHBG	P04278	6462
Cuscutae Semen	MOL005438	campesterol	Estrogen receptor beta (ER-beta) (Nuclear receptor subfamily 3 group A member 2)	ESR2	Q92731	2100
Cuscutae Semen	MOL005438	campesterol	Sterol regulatory element-binding protein 2 (SREBP-2) (Class D basic helix-loop-helix protein 2) (bHLHd2) (Sterol regulatory element-binding transcription factor 2) [Cleaved into: Processed sterol regulatory element-binding protein 2]	SREBF2	Q12772	6721
Cuscutae Semen	MOL005438	campesterol	Sodium-dependent noradrenaline transporter (Norepinephrine transporter) (NET) (Solute carrier family 6 member 2)	SLC6A2	P23975	6530
Cuscutae Semen	MOL005438	campesterol	Muscarinic acetylcholine receptor M2	CHRM2	P08172	1129
Cuscutae Semen	MOL005438	campesterol	Cytochrome P450 2C19 (EC 1.14.14.1) ((R)-limonene 6-monooxygenase) (EC 1.14.14.53) ((S)-limonene 6-monooxygenase) (EC 1.14.14.51) ((S)-limonene 7-monooxygenase) (EC 1.14.14.52) (CYPIIC17) (CYPIIC19) (Cytochrome P450-11A) (Cytochrome P450-254C) (Fenbendazole monooxygenase (4'-hydroxylating)) (EC 1.14.14.75) (Mephenytoin 4-hydroxylase)	CYP2C19	P33261	1557
Cuscutae Semen	MOL005438	campesterol	Nuclear receptor ROR-alpha (Nuclear receptor RZR-alpha) (Nuclear receptor subfamily 1 group F member 1) (RAR-related orphan receptor A) (Retinoid-related orphan receptor-alpha)	RORA	P35398	6095
Cuscutae Semen	MOL005438	campesterol	Tyrosine-protein phosphatase non-receptor type 1 (EC 3.1.3.48) (Protein-tyrosine phosphatase 1B) (PTP-1B)	PTPN1	P18031	5770
Cuscutae Semen	MOL005438	campesterol	Corticosteroid-binding globulin (CBG) (Serpin A6) (Transcortin)	SERPINA6	P08185	866
Cuscutae Semen	MOL005438	campesterol	Cholinesterase (EC 3.1.1.8) (Acylcholine acylhydrolase) (Butyrylcholine esterase) (Choline esterase II) (Pseudocholinesterase)	BCHE	P06276	590

## Sheet: Table S3 (MF 7)
Table S3 continued. Bioactive components of Mori Fructus and their potential targets
Herb_name	Mol ID	Molecule Name	Protein names	Gene name	Uniprot ID	Gene ID
Mori Fructus	MOL000098	quercetin	NADPH oxidase 4 (EC 1.6.3.-) (Kidney oxidase-1) (KOX-1) (Kidney superoxide-producing NADPH oxidase) (Renal NAD(P)H-oxidase)	NOX4	Q9NPH5	50507
Mori Fructus	MOL000098	quercetin	Vasopressin V2 receptor (V2R) (AVPR V2) (Antidiuretic hormone receptor) (Renal-type arginine vasopressin receptor)	AVPR2	P30518	554
Mori Fructus	MOL000098	quercetin	Aldo-keto reductase family 1 member B1 (EC 1.1.1.300) (EC 1.1.1.372) (EC 1.1.1.54) (Aldehyde reductase) (Aldose reductase) (AR) (EC 1.1.1.21)	AKR1B1	P15121	231
Mori Fructus	MOL000098	quercetin	Xanthine dehydrogenase/oxidase [Includes: Xanthine dehydrogenase (XD) (EC 1.17.1.4); Xanthine oxidase (XO) (EC 1.17.3.2) (Xanthine oxidoreductase) (XOR)]	XDH	P47989	7498
Mori Fructus	MOL000098	quercetin	Amine oxidase [flavin-containing] A (EC 1.4.3.4) (Monoamine oxidase type A) (MAO-A)	MAOA	P21397	4128
Mori Fructus	MOL000098	quercetin	Insulin-like growth factor 1 receptor (EC 2.7.10.1) (Insulin-like growth factor I receptor) (IGF-I receptor) (CD antigen CD221) [Cleaved into: Insulin-like growth factor 1 receptor alpha chain; Insulin-like growth factor 1 receptor beta chain]	IGF1R	P08069	3480
Mori Fructus	MOL000098	quercetin	Receptor-type tyrosine-protein kinase FLT3 (EC 2.7.10.1) (FL cytokine receptor) (Fetal liver kinase-2) (FLK-2) (Fms-like tyrosine kinase 3) (FLT-3) (Stem cell tyrosine kinase 1) (STK-1) (CD antigen CD135)	FLT3	P36888	2322
Mori Fructus	MOL000098	quercetin	Aromatase (EC 1.14.14.14) (CYPXIX) (Cytochrome P-450AROM) (Cytochrome P450 19A1) (Estrogen synthase)	CYP19A1	P11511	1588
Mori Fructus	MOL000098	quercetin	Epidermal growth factor receptor (EC 2.7.10.1) (Proto-oncogene c-ErbB-1) (Receptor tyrosine-protein kinase erbB-1)	EGFR	P00533	1956
Mori Fructus	MOL000098	quercetin	Prothrombin (EC 3.4.21.5) (Coagulation factor II) [Cleaved into: Activation peptide fragment 1; Activation peptide fragment 2; Thrombin light chain; Thrombin heavy chain]	F2	P00734	2147
Mori Fructus	MOL000098	quercetin	Carbonic anhydrase 2 (EC 4.2.1.1) (Carbonate dehydratase II) (Carbonic anhydrase C) (CAC) (Carbonic anhydrase II) (CA-II)	CA2	P00918	760
Mori Fructus	MOL000098	quercetin	Serine/threonine-protein kinase pim-1 (EC 2.7.11.1)	PIM1	P11309	5292
Mori Fructus	MOL000098	quercetin	Polyunsaturated fatty acid 5-lipoxygenase (EC 1.13.11.-) (Arachidonate 5-lipoxygenase) (5-LO) (5-lipoxygenase) (EC 1.13.11.34)	ALOX5	P09917	240
Mori Fructus	MOL000098	quercetin	Aurora kinase B (EC 2.7.11.1) (Aurora 1) (Aurora- and IPL1-like midbody-associated protein 1) (AIM-1) (Aurora/IPL1-related kinase 2) (ARK-2) (Aurora-related kinase 2) (STK-1) (Serine/threonine-protein kinase 12) (Serine/threonine-protein kinase 5) (Serine/threonine-protein kinase aurora-B)	AURKB	Q96GD4	9212
Mori Fructus	MOL000098	quercetin	D(4) dopamine receptor (D(2C) dopamine receptor) (Dopamine D4 receptor)	DRD4	P21917	1815
Mori Fructus	MOL000098	quercetin	Adenosine receptor A1	ADORA1	P30542	134
Mori Fructus	MOL000098	quercetin	Carbonic anhydrase 7 (EC 4.2.1.1) (Carbonate dehydratase VII) (Carbonic anhydrase VII) (CA-VII)	CA7	P43166	766
Mori Fructus	MOL000098	quercetin	Lactoylglutathione lyase (EC 4.4.1.5) (Aldoketomutase) (Glyoxalase I) (Glx I) (Ketone-aldehyde mutase) (Methylglyoxalase) (S-D-lactoylglutathione methylglyoxal lyase)	GLO1	Q04760	2739
Mori Fructus	MOL000098	quercetin	Myeloperoxidase (MPO) (EC 1.11.2.2) [Cleaved into: Myeloperoxidase; 89 kDa myeloperoxidase; 84 kDa myeloperoxidase; Myeloperoxidase light chain; Myeloperoxidase heavy chain]	MPO	P05164	4353
Mori Fructus	MOL000098	quercetin	Phosphatidylinositol 3-kinase regulatory subunit alpha (PI3-kinase regulatory subunit alpha) (PI3K regulatory subunit alpha) (PtdIns-3-kinase regulatory subunit alpha) (Phosphatidylinositol 3-kinase 85 kDa regulatory subunit alpha) (PI3-kinase subunit p85-alpha) (PtdIns-3-kinase regulatory subunit p85-alpha)	PIK3R1	P27986	5295
Mori Fructus	MOL000098	quercetin	Adenosine receptor A2a	ADORA2A	P29274	135
Mori Fructus	MOL000098	quercetin	Death-associated protein kinase 1 (DAP kinase 1) (EC 2.7.11.1)	DAPK1	P53355	1612
Mori Fructus	MOL000098	quercetin	Glycogen phosphorylase, liver form (EC 2.4.1.1)	PYGL	P06737	5836
Mori Fructus	MOL000098	quercetin	Carbonic anhydrase 1 (EC 4.2.1.1) (Carbonate dehydratase I) (Carbonic anhydrase B) (CAB) (Carbonic anhydrase I) (CA-I)	CA1	P00915	759
Mori Fructus	MOL000098	quercetin	Glycogen synthase kinase-3 beta (GSK-3 beta) (EC 2.7.11.26) (Serine/threonine-protein kinase GSK3B) (EC 2.7.11.1)	GSK3B	P49841	2932
Mori Fructus	MOL000098	quercetin	Proto-oncogene tyrosine-protein kinase Src (EC 2.7.10.2) (Proto-oncogene c-Src) (pp60c-src) (p60-Src)	SRC	P12931	6714
Mori Fructus	MOL000098	quercetin	Focal adhesion kinase 1 (FADK 1) (EC 2.7.10.2) (Focal adhesion kinase-related nonkinase) (FRNK) (Protein phosphatase 1 regulatory subunit 71) (PPP1R71) (Protein-tyrosine kinase 2) (p125FAK) (pp125FAK)	PTK2	Q05397	5747
Mori Fructus	MOL000098	quercetin	Estradiol 17-beta-dehydrogenase 2 (EC 1.1.1.62) (17-beta-hydroxysteroid dehydrogenase type 2) (17-beta-HSD 2) (20 alpha-hydroxysteroid dehydrogenase) (20-alpha-HSD) (E2DH) (Microsomal 17-beta-hydroxysteroid dehydrogenase) (Short chain dehydrogenase/reductase family 9C member 2) (Testosterone 17-beta-dehydrogenase) (EC 1.1.1.239)	HSD17B2	P37059	3294
Mori Fructus	MOL000098	quercetin	Vascular endothelial growth factor receptor 2 (VEGFR-2) (EC 2.7.10.1) (Fetal liver kinase 1) (FLK-1) (Kinase insert domain receptor) (KDR) (Protein-tyrosine kinase receptor flk-1) (CD antigen CD309)	KDR	P35968	3791
Mori Fructus	MOL000098	quercetin	Collagenase 3 (EC 3.4.24.-) (Matrix metalloproteinase-13) (MMP-13)	MMP13	P45452	4322
Mori Fructus	MOL000098	quercetin	Stromelysin-1 (SL-1) (EC 3.4.24.17) (Matrix metalloproteinase-3) (MMP-3) (Transin-1)	MMP3	P08254	4314
Mori Fructus	MOL000098	quercetin	Carbonic anhydrase 3 (EC 4.2.1.1) (Carbonate dehydratase III) (Carbonic anhydrase III) (CA-III)	CA3	P07451	761
Mori Fructus	MOL000098	quercetin	Polyunsaturated fatty acid lipoxygenase ALOX15 (12/15-lipoxygenase) (Arachidonate 12-lipoxygenase, leukocyte-type) (12-LOX) (EC 1.13.11.31) (Arachidonate 15-lipoxygenase) (15-LOX) (15-LOX-1) (EC 1.13.11.33) (Arachidonate omega-6 lipoxygenase) (Hepoxilin A3 synthase Alox15) (EC 1.13.11.-) (Linoleate 13S-lipoxygenase) (EC 1.13.11.12)	ALOX15	P16050	246
Mori Fructus	MOL000098	quercetin	Multidrug resistance-associated protein 1 (EC 7.6.2.2) (ATP-binding cassette sub-family C member 1) (Glutathione-S-conjugate-translocating ATPase ABCC1) (EC 7.6.2.3) (Leukotriene C(4) transporter) (LTC4 transporter)	ABCC1	P33527	4363
Mori Fructus	MOL000098	quercetin	Serine/threonine-protein kinase PLK1 (EC 2.7.11.21) (Polo-like kinase 1) (PLK-1) (Serine/threonine-protein kinase 13) (STPK13)	PLK1	P53350	5347
Mori Fructus	MOL000098	quercetin	Carbonic anhydrase 6 (EC 4.2.1.1) (Carbonate dehydratase VI) (Carbonic anhydrase VI) (CA-VI) (Salivary carbonic anhydrase) (Secreted carbonic anhydrase)	CA6	P23280	765
Mori Fructus	MOL000098	quercetin	Cyclin-dependent kinase 1 (CDK1) (EC 2.7.11.22) (EC 2.7.11.23) (Cell division control protein 2 homolog) (Cell division protein kinase 1) (p34 protein kinase)	CDK1	P06493	983
Mori Fructus	MOL000098	quercetin	Matrix metalloproteinase-9 (MMP-9) (EC 3.4.24.35) (92 kDa gelatinase) (92 kDa type IV collagenase) (Gelatinase B) (GELB) [Cleaved into: 67 kDa matrix metalloproteinase-9; 82 kDa matrix metalloproteinase-9]	MMP9	P14780	4318
Mori Fructus	MOL000098	quercetin	Carbonic anhydrase 12 (EC 4.2.1.1) (Carbonate dehydratase XII) (Carbonic anhydrase XII) (CA-XII) (Tumor antigen HOM-RCC-3.1.3)	CA12	O43570	771
Mori Fructus	MOL000098	quercetin	72 kDa type IV collagenase (EC 3.4.24.24) (72 kDa gelatinase) (Gelatinase A) (Matrix metalloproteinase-2) (MMP-2) (TBE-1) [Cleaved into: PEX]	MMP2	P08253	4313
Mori Fructus	MOL000098	quercetin	Serine/threonine-protein kinase N1 (EC 2.7.11.13) (Protease-activated kinase 1) (PAK-1) (Protein kinase C-like 1) (Protein kinase C-like PKN) (Protein kinase PKN-alpha) (Protein-kinase C-related kinase 1) (Serine-threonine protein kinase N)	PKN1	Q16512	5585
Mori Fructus	MOL000098	quercetin	Carbonic anhydrase 14 (EC 4.2.1.1) (Carbonate dehydratase XIV) (Carbonic anhydrase XIV) (CA-XIV)	CA14	Q9ULX7	23632
Mori Fructus	MOL000098	quercetin	Carbonic anhydrase 9 (EC 4.2.1.1) (Carbonate dehydratase IX) (Carbonic anhydrase IX) (CA-IX) (CAIX) (Membrane antigen MN) (P54/58N) (Renal cell carcinoma-associated antigen G250) (RCC-associated antigen G250) (pMW1)	CA9	Q16790	768
Mori Fructus	MOL000098	quercetin	Casein kinase II subunit alpha (CK II alpha) (EC 2.7.11.1)	CSNK2A1	P68400	1457
Mori Fructus	MOL000098	quercetin	Polyunsaturated fatty acid lipoxygenase ALOX12 (EC 1.13.11.-) (Arachidonate (12S)-lipoxygenase) (12S-LOX) (12S-lipoxygenase) (EC 1.13.11.31) (Arachidonate (15S)-lipoxygenase) (EC 1.13.11.33) (Linoleate (13S)-lipoxygenase) (Lipoxin synthase 12-LO) (EC 3.3.2.-) (Platelet-type lipoxygenase 12)	ALOX12	P18054	239
Mori Fructus	MOL000098	quercetin	Hepatocyte growth factor receptor (HGF receptor) (EC 2.7.10.1) (HGF/SF receptor) (Proto-oncogene c-Met) (Scatter factor receptor) (SF receptor) (Tyrosine-protein kinase Met)	MET	P08581	4233
Mori Fructus	MOL000098	quercetin	Carbonic anhydrase 4 (EC 4.2.1.1) (Carbonate dehydratase IV) (Carbonic anhydrase IV) (CA-IV)	CA4	P22748	762
Mori Fructus	MOL000098	quercetin	Serine/threonine-protein kinase Nek2 (EC 2.7.11.1) (HSPK 21) (Never in mitosis A-related kinase 2) (NimA-related protein kinase 2) (NimA-like protein kinase 1)	NEK2	P51955	4751
Mori Fructus	MOL000098	quercetin	C-X-C chemokine receptor type 1 (CXC-R1) (CXCR-1) (CDw128a) (High affinity interleukin-8 receptor A) (IL-8R A) (IL-8 receptor type 1) (CD antigen CD181)	CXCR1	P25024	3577
Mori Fructus	MOL000098	quercetin	Calcium/calmodulin-dependent protein kinase type II subunit beta (CaM kinase II subunit beta) (CaMK-II subunit beta) (EC 2.7.11.17)	CAMK2B	Q13554	816
Mori Fructus	MOL000098	quercetin	ALK tyrosine kinase receptor (EC 2.7.10.1) (Anaplastic lymphoma kinase) (CD antigen CD246)	ALK	Q9UM73	238
Mori Fructus	MOL000098	quercetin	RAC-alpha serine/threonine-protein kinase (EC 2.7.11.1) (Protein kinase B) (PKB) (Protein kinase B alpha) (PKB alpha) (Proto-oncogene c-Akt) (RAC-PK-alpha)	AKT1	P31749	207
Mori Fructus	MOL000098	quercetin	ATP-dependent translocase ABCB1 (ATP-binding cassette sub-family B member 1) (Multidrug resistance protein 1) (EC 7.6.2.2) (P-glycoprotein 1) (Phospholipid transporter ABCB1) (EC 7.6.2.1) (CD antigen CD243)	ABCB1	P08183	5243
Mori Fructus	MOL000098	quercetin	Serine/threonine-protein kinase Nek6 (EC 2.7.11.1) (Never in mitosis A-related kinase 6) (NimA-related protein kinase 6) (Protein kinase SID6-1512)	NEK6	Q9HC98	10783
Mori Fructus	MOL000098	quercetin	Phospholipase A2 (EC 3.1.1.4) (Group IB phospholipase A2) (Phosphatidylcholine 2-acylhydrolase 1B)	PLA2G1B	P04054	5319
Mori Fructus	MOL000098	quercetin	Carbonic anhydrase 5A, mitochondrial (EC 4.2.1.1) (Carbonate dehydratase VA) (Carbonic anhydrase VA) (CA-VA)	CA5A	P35218	763
Mori Fructus	MOL000098	quercetin	Beta-secretase 1 (EC 3.4.23.46) (Aspartyl protease 2) (ASP2) (Asp 2) (Beta-site amyloid precursor protein cleaving enzyme 1) (Beta-site APP cleaving enzyme 1) (Memapsin-2) (Membrane-associated aspartic protease 2)	BACE1	P56817	23621
Mori Fructus	MOL000098	quercetin	Cytochrome P450 1B1 (EC 1.14.14.1) (CYPIB1) (Hydroperoxy icosatetraenoate dehydratase) (EC 4.2.1.152)	CYP1B1	Q16678	1545
Mori Fructus	MOL000098	quercetin	Tyrosine-protein kinase receptor UFO (EC 2.7.10.1) (AXL oncogene)	AXL	P30530	558
Mori Fructus	MOL000098	quercetin	Broad substrate specificity ATP-binding cassette transporter ABCG2 (EC 7.6.2.2) (ATP-binding cassette sub-family G member 2) (Breast cancer resistance protein) (CDw338) (Mitoxantrone resistance-associated protein) (Placenta-specific ATP-binding cassette transporter) (Urate exporter) (CD antigen CD338)	ABCG2	Q9UNQ0	9429
Mori Fructus	MOL000098	quercetin	NUAK family SNF1-like kinase 1 (EC 2.7.11.1) (AMPK-related protein kinase 5) (ARK5) (Omphalocele kinase 1)	NUAK1	O60285	9891
Mori Fructus	MOL000098	quercetin	Aldo-keto reductase family 1 member C2 (EC 1.-.-.-) (3-alpha-HSD3) (Chlordecone reductase homolog HAKRD) (Dihydrodiol dehydrogenase 2) (DD-2) (DD2) (Dihydrodiol dehydrogenase/bile acid-binding protein) (DD/BABP) (Trans-1,2-dihydrobenzene-1,2-diol dehydrogenase) (EC 1.3.1.20) (Type III 3-alpha-hydroxysteroid dehydrogenase) (EC 1.1.1.357)	AKR1C2	P52895	1646
Mori Fructus	MOL000098	quercetin	Aldo-keto reductase family 1 member C1 (EC 1.1.1.-) (20-alpha-hydroxysteroid dehydrogenase) (20-alpha-HSD) (EC 1.1.1.149) (Chlordecone reductase homolog HAKRC) (Dihydrodiol dehydrogenase 1/2) (DD1/DD2) (High-affinity hepatic bile acid-binding protein) (HBAB) (Indanol dehydrogenase) (EC 1.1.1.112) (Trans-1,2-dihydrobenzene-1,2-diol dehydrogenase) (EC 1.3.1.20)	AKR1C1	Q04828	1645
Mori Fructus	MOL000098	quercetin	Aldo-keto reductase family 1 member C3 (EC 1.-.-.-) (17-beta-hydroxysteroid dehydrogenase type 5) (17-beta-HSD 5) (3-alpha-HSD type II, brain) (3-alpha-hydroxysteroid dehydrogenase type 2) (3-alpha-HSD type 2) (EC 1.1.1.357) (Chlordecone reductase homolog HAKRb) (Dihydrodiol dehydrogenase 3) (DD-3) (DD3) (Dihydrodiol dehydrogenase type I) (HA1753) (Indanol dehydrogenase) (EC 1.1.1.112) (Prostagla…	AKR1C3	P42330	8644
Mori Fructus	MOL000098	quercetin	Aldo-keto reductase family 1 member C4 (EC 1.1.1.-) (3-alpha-HSD1) (3-alpha-hydroxysteroid dehydrogenase type I) (EC 1.1.1.357) (Chlordecone reductase) (CDR) (EC 1.1.1.225) (Dihydrodiol dehydrogenase 4) (DD-4) (DD4) (HAKRA)	AKR1C4	P17516	1109
Mori Fructus	MOL000098	quercetin	Carbonic anhydrase 13 (EC 4.2.1.1) (Carbonate dehydratase XIII) (Carbonic anhydrase XIII) (CA-XIII)	CA13	Q8N1Q1	377677
Mori Fructus	MOL000098	quercetin	Aldo-keto reductase family 1 member A1 (EC 1.1.1.2) (EC 1.1.1.372) (EC 1.1.1.54) (Alcohol dehydrogenase [NADP(+)]) (Aldehyde reductase) (Glucuronate reductase) (EC 1.1.1.19) (Glucuronolactone reductase) (EC 1.1.1.20)	AKR1A1	P14550	10327
Mori Fructus	MOL000098	quercetin	G-protein coupled receptor 35 (Kynurenic acid receptor) (KYNA receptor)	GPR35	Q9HC97	2859
Mori Fructus	MOL000098	quercetin	Tyrosine-protein kinase SYK (EC 2.7.10.2) (Spleen tyrosine kinase) (p72-Syk)	SYK	P43405	6850
Mori Fructus	MOL000098	quercetin	Microtubule-associated protein tau (Neurofibrillary tangle protein) (Paired helical filament-tau) (PHF-tau)	MAPT	P10636	4137
Mori Fructus	MOL000098	quercetin	Lysine-specific demethylase 4E (EC 1.14.11.66) (KDM4D-like protein) (Lysine-specific demethylase 4D-like) ([histone H3]-trimethyl-L-lysine(9) demethylase 4E)	KDM4E	B2RXH2	390245
Mori Fructus	MOL000098	quercetin	DNA topoisomerase 2-alpha (EC 5.6.2.2) (DNA topoisomerase II, alpha isozyme)	TOP2A	P11388	7153
Mori Fructus	MOL000098	quercetin	Insulin receptor (IR) (EC 2.7.10.1) (CD antigen CD220) [Cleaved into: Insulin receptor subunit alpha; Insulin receptor subunit beta]	INSR	P06213	3643
Mori Fructus	MOL000098	quercetin	Acetylcholinesterase (AChE) (EC 3.1.1.7)	ACHE	P22303	43
Mori Fructus	MOL000098	quercetin	Myosin light chain kinase, smooth muscle (MLCK) (smMLCK) (EC 2.7.11.18) (Kinase-related protein) (KRP) (Telokin) [Cleaved into: Myosin light chain kinase, smooth muscle, deglutamylated form]	MYLK	Q15746	4638
Mori Fructus	MOL000098	quercetin	Phosphatidylinositol 4,5-bisphosphate 3-kinase catalytic subunit gamma isoform (PI3-kinase subunit gamma) (PI3K-gamma) (PI3Kgamma) (PtdIns-3-kinase subunit gamma) (EC 2.7.1.153) (Phosphatidylinositol 4,5-bisphosphate 3-kinase 110 kDa catalytic subunit gamma) (PtdIns-3-kinase subunit p110-gamma) (p110gamma) (Phosphoinositide-3-kinase catalytic gamma polypeptide) (Serine/threonine protein kinase PI…	PIK3CG	P48736	5294
Mori Fructus	MOL000098	quercetin	DNA-(apurinic or apyrimidinic site) endonuclease (EC 3.1.-.-) (APEX nuclease) (APEN) (Apurinic-apyrimidinic endonuclease 1) (AP endonuclease 1) (APE-1) (REF-1) (Redox factor-1) [Cleaved into: DNA-(apurinic or apyrimidinic site) endonuclease, mitochondrial]	APEX1	P27695	328
Mori Fructus	MOL000098	quercetin	Cyclin-dependent kinase 5 activator 1 (CDK5 activator 1) (Cyclin-dependent kinase 5 regulatory subunit 1) (TPKII regulatory subunit) [Cleaved into: Cyclin-dependent kinase 5 activator 1, p35 (p35); Cyclin-dependent kinase 5 activator 1, p25 (p25) (Tau protein kinase II 23 kDa subunit) (p23)]	CDK5R1	Q15078	8851
Mori Fructus	MOL000098	quercetin	Cyclin-dependent-like kinase 5 (EC 2.7.11.1) (Cell division protein kinase 5) (Serine/threonine-protein kinase PSSALRE) (Tau protein kinase II catalytic subunit) (TPKII catalytic subunit)	CDK5	Q00535	1020
Mori Fructus	MOL000098	quercetin	G2/mitotic-specific cyclin-B3	CCNB3	Q8WWL7	85417
Mori Fructus	MOL000098	quercetin	Cyclin-dependent kinase 1 (CDK1) (EC 2.7.11.22) (EC 2.7.11.23) (Cell division control protein 2 homolog) (Cell division protein kinase 1) (p34 protein kinase)	CDK1	P06493	983
Mori Fructus	MOL000098	quercetin	G2/mitotic-specific cyclin-B2	CCNB1	O95067	9133
Mori Fructus	MOL000098	quercetin	G2/mitotic-specific cyclin-B2	CCNB2	O95067	9133
Mori Fructus	MOL000098	quercetin	Arginase-1 (EC 3.5.3.1) (Liver-type arginase) (Type I arginase)	ARG1	P05089	383
Mori Fructus	MOL000098	quercetin	Receptor-type tyrosine-protein phosphatase S (R-PTP-S) (EC 3.1.3.48) (Receptor-type tyrosine-protein phosphatase sigma) (R-PTP-sigma)	PTPRS	Q13332	5802
Mori Fructus	MOL000098	quercetin	Estrogen receptor beta (ER-beta) (Nuclear receptor subfamily 3 group A member 2)	ESR2	Q92731	2100
Mori Fructus	MOL000098	quercetin	DNA-3-methyladenine glycosylase (EC 3.2.2.21) (3-alkyladenine DNA glycosylase) (3-methyladenine DNA glycosidase) (ADPG) (N-methylpurine-DNA glycosylase)	MPG	P29372	4350
Mori Fructus	MOL000098	quercetin	Solute carrier family 22 member 12 (Organic anion transporter 4-like protein) (Renal-specific transporter) (RST) (Urate anion exchanger 1)	SLC22A12	Q96S37	116085
Mori Fructus	MOL000098	quercetin	Cyclin-dependent kinase 6 (EC 2.7.11.22) (Cell division protein kinase 6) (Serine/threonine-protein kinase PLSTIRE)	CDK6	Q00534	1021
Mori Fructus	MOL000098	quercetin	Cyclin-dependent kinase 2 (EC 2.7.11.22) (Cell division protein kinase 2) (p33 protein kinase)	CDK2	P24941	1017
Mori Fructus	MOL000098	quercetin	Tyrosinase (EC 1.14.18.1) (LB24-AB) (Monophenol monooxygenase) (SK29-AB) (Tumor rejection antigen AB)	TYR	P14679	7299
Mori Fructus	MOL000098	quercetin	Estradiol 17-beta-dehydrogenase 1 (EC 1.1.1.62) (17-beta-hydroxysteroid dehydrogenase type 1) (17-beta-HSD 1) (20 alpha-hydroxysteroid dehydrogenase) (20-alpha-HSD) (E2DH) (Placental 17-beta-hydroxysteroid dehydrogenase) (Short chain dehydrogenase/reductase family 28C member 1)	HSD17B1	P14061	3292
Mori Fructus	MOL000098	quercetin	Aryl hydrocarbon receptor (Ah receptor) (AhR) (Class E basic helix-loop-helix protein 76) (bHLHe76)	AHR	P35869	196
Mori Fructus	MOL000098	quercetin	Steroid hormone receptor ERR1 (Estrogen receptor-like 1) (Estrogen-related receptor alpha) (ERR-alpha) (Nuclear receptor subfamily 3 group B member 1)	ESRRA	P11474	2101
Mori Fructus	MOL000098	quercetin	Amyloid-beta precursor protein (APP) (ABPP) (APPI) (Alzheimer disease amyloid protein) (Amyloid precursor protein) (Amyloid-beta A4 protein) (Cerebral vascular amyloid peptide) (CVAP) (PreA4) (Protease nexin-II) (PN-II) [Cleaved into: N-APP; Soluble APP-alpha (S-APP-alpha); Soluble APP-beta (S-APP-beta); C99 (Beta-secretase C-terminal fragment) (Beta-CTF); Amyloid-beta protein 42 (Abeta42) (Beta-…	APP	P05067	351
Mori Fructus	MOL000098	quercetin	Poly [ADP-ribose] polymerase 1 (PARP-1) (EC 2.4.2.30) (ADP-ribosyltransferase diphtheria toxin-like 1) (ARTD1) (DNA ADP-ribosyltransferase PARP1) (EC 2.4.2.-) (NAD(+) ADP-ribosyltransferase 1) (ADPRT 1) (Poly[ADP-ribose] synthase 1) (Protein poly-ADP-ribosyltransferase PARP1) (EC 2.4.2.-)	PARP1	P09874	142
Mori Fructus	MOL000098	quercetin	Transthyretin (ATTR) (Prealbumin) (TBPA)	TTR	P02766	7276
Mori Fructus	MOL000098	quercetin	Macrophage metalloelastase (MME) (EC 3.4.24.65) (Macrophage elastase) (ME) (hME) (Matrix metalloproteinase-12) (MMP-12)	MMP12	P39900	4321
Mori Fructus	MOL000098	quercetin	ADP-ribosyl cyclase/cyclic ADP-ribose hydrolase 1 (EC 3.2.2.6) (2'-phospho-ADP-ribosyl cyclase) (2'-phospho-ADP-ribosyl cyclase/2'-phospho-cyclic-ADP-ribose transferase) (EC 2.4.99.20) (2'-phospho-cyclic-ADP-ribose transferase) (ADP-ribosyl cyclase 1) (ADPRC 1) (Cyclic ADP-ribose hydrolase 1) (cADPr hydrolase 1) (T10) (CD antigen CD38)	CD38	P28907	952
Mori Fructus	MOL000098	quercetin	Aldo-keto reductase family 1 member B10 (EC 1.1.1.300) (EC 1.1.1.54) (ARL-1) (Aldose reductase-like) (Aldose reductase-related protein) (ARP) (hARP) (Small intestine reductase) (SI reductase)	AKR1B10	O60218	57016
Mori Fructus	MOL000098	quercetin	Poly [ADP-ribose] polymerase tankyrase-2 (EC 2.4.2.30) (ADP-ribosyltransferase diphtheria toxin-like 6) (ARTD6) (Poly [ADP-ribose] polymerase 5B) (Protein poly-ADP-ribosyltransferase tankyrase-2) (EC 2.4.2.-) (TNKS-2) (TRF1-interacting ankyrin-related ADP-ribose polymerase 2) (Tankyrase II) (Tankyrase-2) (TANK2) (Tankyrase-like protein) (Tankyrase-related protein)	TNKS2	Q9H2K2	80351
Mori Fructus	MOL000098	quercetin	Poly [ADP-ribose] polymerase tankyrase-1 (EC 2.4.2.30) (ADP-ribosyltransferase diphtheria toxin-like 5) (ARTD5) (Poly [ADP-ribose] polymerase 5A) (Protein poly-ADP-ribosyltransferase tankyrase-1) (EC 2.4.2.-) (TNKS-1) (TRF1-interacting ankyrin-related ADP-ribose polymerase) (Tankyrase I) (Tankyrase-1) (TANK1)	TNKS	O95271	8658
Mori Fructus	MOL000098	quercetin	DNA topoisomerase 1 (EC 5.6.2.1) (DNA topoisomerase I)	TOP1	P11387	7150
Mori Fructus	MOL000098	quercetin	Telomerase reverse transcriptase (EC 2.7.7.49) (HEST2) (Telomerase catalytic subunit) (Telomerase-associated protein 2) (TP2)	TERT	O14746	7015
Cuscutae Semen	MOL000422	kaempferol	NADPH oxidase 4 (EC 1.6.3.-) (Kidney oxidase-1) (KOX-1) (Kidney superoxide-producing NADPH oxidase) (Renal NAD(P)H-oxidase)	NOX4	Q9NPH5	50507
Cuscutae Semen	MOL000422	kaempferol	Aldo-keto reductase family 1 member B1 (EC 1.1.1.300) (EC 1.1.1.372) (EC 1.1.1.54) (Aldehyde reductase) (Aldose reductase) (AR) (EC 1.1.1.21)	AKR1B1	P15121	231
Cuscutae Semen	MOL000422	kaempferol	Xanthine dehydrogenase/oxidase [Includes: Xanthine dehydrogenase (XD) (EC 1.17.1.4); Xanthine oxidase (XO) (EC 1.17.3.2) (Xanthine oxidoreductase) (XOR)]	XDH	P47989	7498
Cuscutae Semen	MOL000422	kaempferol	Tyrosinase (EC 1.14.18.1) (LB24-AB) (Monophenol monooxygenase) (SK29-AB) (Tumor rejection antigen AB)	TYR	P14679	7299
Cuscutae Semen	MOL000422	kaempferol	Receptor-type tyrosine-protein kinase FLT3 (EC 2.7.10.1) (FL cytokine receptor) (Fetal liver kinase-2) (FLK-2) (Fms-like tyrosine kinase 3) (FLT-3) (Stem cell tyrosine kinase 1) (STK-1) (CD antigen CD135)	FLT3	P36888	2322
Cuscutae Semen	MOL000422	kaempferol	Carbonic anhydrase 2 (EC 4.2.1.1) (Carbonate dehydratase II) (Carbonic anhydrase C) (CAC) (Carbonic anhydrase II) (CA-II)	CA2	P00918	760
Cuscutae Semen	MOL000422	kaempferol	Polyunsaturated fatty acid 5-lipoxygenase (EC 1.13.11.-) (Arachidonate 5-lipoxygenase) (5-LO) (5-lipoxygenase) (EC 1.13.11.34)	ALOX5	P09917	240
Cuscutae Semen	MOL000422	kaempferol	Carbonic anhydrase 7 (EC 4.2.1.1) (Carbonate dehydratase VII) (Carbonic anhydrase VII) (CA-VII)	CA7	P43166	766
Cuscutae Semen	MOL000422	kaempferol	Estradiol 17-beta-dehydrogenase 2 (EC 1.1.1.62) (17-beta-hydroxysteroid dehydrogenase type 2) (17-beta-HSD 2) (20 alpha-hydroxysteroid dehydrogenase) (20-alpha-HSD) (E2DH) (Microsomal 17-beta-hydroxysteroid dehydrogenase) (Short chain dehydrogenase/reductase family 9C member 2) (Testosterone 17-beta-dehydrogenase) (EC 1.1.1.239)	HSD17B2	P37059	3294
Cuscutae Semen	MOL000422	kaempferol	Multidrug resistance-associated protein 1 (EC 7.6.2.2) (ATP-binding cassette sub-family C member 1) (Glutathione-S-conjugate-translocating ATPase ABCC1) (EC 7.6.2.3) (Leukotriene C(4) transporter) (LTC4 transporter)	ABCC1	P33527	4363
Cuscutae Semen	MOL000422	kaempferol	Estradiol 17-beta-dehydrogenase 1 (EC 1.1.1.62) (17-beta-hydroxysteroid dehydrogenase type 1) (17-beta-HSD 1) (20 alpha-hydroxysteroid dehydrogenase) (20-alpha-HSD) (E2DH) (Placental 17-beta-hydroxysteroid dehydrogenase) (Short chain dehydrogenase/reductase family 28C member 1)	HSD17B1	P14061	3292
Cuscutae Semen	MOL000422	kaempferol	Aryl hydrocarbon receptor (Ah receptor) (AhR) (Class E basic helix-loop-helix protein 76) (bHLHe76)	AHR	P35869	196
Cuscutae Semen	MOL000422	kaempferol	Carbonic anhydrase 12 (EC 4.2.1.1) (Carbonate dehydratase XII) (Carbonic anhydrase XII) (CA-XII) (Tumor antigen HOM-RCC-3.1.3)	CA12	O43570	771
Cuscutae Semen	MOL000422	kaempferol	Steroid hormone receptor ERR1 (Estrogen receptor-like 1) (Estrogen-related receptor alpha) (ERR-alpha) (Nuclear receptor subfamily 3 group B member 1)	ESRRA	P11474	2101
Cuscutae Semen	MOL000422	kaempferol	ATP-dependent translocase ABCB1 (ATP-binding cassette sub-family B member 1) (Multidrug resistance protein 1) (EC 7.6.2.2) (P-glycoprotein 1) (Phospholipid transporter ABCB1) (EC 7.6.2.1) (CD antigen CD243)	ABCB1	P08183	5243
Cuscutae Semen	MOL000422	kaempferol	Cytochrome P450 1B1 (EC 1.14.14.1) (CYPIB1) (Hydroperoxy icosatetraenoate dehydratase) (EC 4.2.1.152)	CYP1B1	Q16678	1545
Cuscutae Semen	MOL000422	kaempferol	Broad substrate specificity ATP-binding cassette transporter ABCG2 (EC 7.6.2.2) (ATP-binding cassette sub-family G member 2) (Breast cancer resistance protein) (CDw338) (Mitoxantrone resistance-associated protein) (Placenta-specific ATP-binding cassette transporter) (Urate exporter) (CD antigen CD338)	ABCG2	Q9UNQ0	9429
Cuscutae Semen	MOL000422	kaempferol	Adenosine receptor A1	ADORA1	P30542	134
Cuscutae Semen	MOL000422	kaempferol	Carbonic anhydrase 4 (EC 4.2.1.1) (Carbonate dehydratase IV) (Carbonic anhydrase IV) (CA-IV)	CA4	P22748	762
Cuscutae Semen	MOL000422	kaempferol	Acetylcholinesterase (AChE) (EC 3.1.1.7)	ACHE	P22303	43
Cuscutae Semen	MOL000422	kaempferol	Amine oxidase [flavin-containing] A (EC 1.4.3.4) (Monoamine oxidase type A) (MAO-A)	MAOA	P21397	4128
Cuscutae Semen	MOL000422	kaempferol	Lactoylglutathione lyase (EC 4.4.1.5) (Aldoketomutase) (Glyoxalase I) (Glx I) (Ketone-aldehyde mutase) (Methylglyoxalase) (S-D-lactoylglutathione methylglyoxal lyase)	GLO1	Q04760	2739
Cuscutae Semen	MOL000422	kaempferol	Tyrosine-protein kinase SYK (EC 2.7.10.2) (Spleen tyrosine kinase) (p72-Syk)	SYK	P43405	6850
Cuscutae Semen	MOL000422	kaempferol	Glycogen synthase kinase-3 beta (GSK-3 beta) (EC 2.7.11.26) (Serine/threonine-protein kinase GSK3B) (EC 2.7.11.1)	GSK3B	P49841	2932
Cuscutae Semen	MOL000422	kaempferol	Matrix metalloproteinase-9 (MMP-9) (EC 3.4.24.35) (92 kDa gelatinase) (92 kDa type IV collagenase) (Gelatinase B) (GELB) [Cleaved into: 67 kDa matrix metalloproteinase-9; 82 kDa matrix metalloproteinase-9]	MMP9	P14780	4318
Cuscutae Semen	MOL000422	kaempferol	72 kDa type IV collagenase (EC 3.4.24.24) (72 kDa gelatinase) (Gelatinase A) (Matrix metalloproteinase-2) (MMP-2) (TBE-1) [Cleaved into: PEX]	MMP2	P08253	4313
Cuscutae Semen	MOL000422	kaempferol	Polyunsaturated fatty acid lipoxygenase ALOX15 (12/15-lipoxygenase) (Arachidonate 12-lipoxygenase, leukocyte-type) (12-LOX) (EC 1.13.11.31) (Arachidonate 15-lipoxygenase) (15-LOX) (15-LOX-1) (EC 1.13.11.33) (Arachidonate omega-6 lipoxygenase) (Hepoxilin A3 synthase Alox15) (EC 1.13.11.-) (Linoleate 13S-lipoxygenase) (EC 1.13.11.12)	ALOX15	P16050	246
Cuscutae Semen	MOL000422	kaempferol	Polyunsaturated fatty acid lipoxygenase ALOX12 (EC 1.13.11.-) (Arachidonate (12S)-lipoxygenase) (12S-LOX) (12S-lipoxygenase) (EC 1.13.11.31) (Arachidonate (15S)-lipoxygenase) (EC 1.13.11.33) (Linoleate (13S)-lipoxygenase) (Lipoxin synthase 12-LO) (EC 3.3.2.-) (Platelet-type lipoxygenase 12)	ALOX12	P18054	239
Cuscutae Semen	MOL000422	kaempferol	Receptor-type tyrosine-protein phosphatase S (R-PTP-S) (EC 3.1.3.48) (Receptor-type tyrosine-protein phosphatase sigma) (R-PTP-sigma)	PTPRS	Q13332	5802
Cuscutae Semen	MOL000422	kaempferol	Adenosine receptor A2a	ADORA2A	P29274	135
Cuscutae Semen	MOL000422	kaempferol	Cyclin-dependent kinase 5 activator 1 (CDK5 activator 1) (Cyclin-dependent kinase 5 regulatory subunit 1) (TPKII regulatory subunit) [Cleaved into: Cyclin-dependent kinase 5 activator 1, p35 (p35); Cyclin-dependent kinase 5 activator 1, p25 (p25) (Tau protein kinase II 23 kDa subunit) (p23)]	CDK5R1	Q15078	8851
Cuscutae Semen	MOL000422	kaempferol	Cyclin-dependent-like kinase 5 (EC 2.7.11.1) (Cell division protein kinase 5) (Serine/threonine-protein kinase PSSALRE) (Tau protein kinase II catalytic subunit) (TPKII catalytic subunit)	CDK5	Q00535	1020
Cuscutae Semen	MOL000422	kaempferol	G2/mitotic-specific cyclin-B3	CCNB3	Q8WWL7	85417
Cuscutae Semen	MOL000422	kaempferol	Cyclin-dependent kinase 1 (CDK1) (EC 2.7.11.22) (EC 2.7.11.23) (Cell division control protein 2 homolog) (Cell division protein kinase 1) (p34 protein kinase)	CDK1	P06493	983
Cuscutae Semen	MOL000422	kaempferol	G2/mitotic-specific cyclin-B1	CCNB1	P14635	891
Cuscutae Semen	MOL000422	kaempferol	G2/mitotic-specific cyclin-B2	CCNB2	O95067	9133
Cuscutae Semen	MOL000422	kaempferol	Arginase-1 (EC 3.5.3.1) (Liver-type arginase) (Type I arginase)	ARG1	P05089	383
Cuscutae Semen	MOL000422	kaempferol	G-protein coupled receptor 35 (Kynurenic acid receptor) (KYNA receptor)	GPR35	Q9HC97	2859
Cuscutae Semen	MOL000422	kaempferol	Estrogen receptor beta (ER-beta) (Nuclear receptor subfamily 3 group A member 2)	ESR2	Q92731	2100
Cuscutae Semen	MOL000422	kaempferol	Death-associated protein kinase 1 (DAP kinase 1) (EC 2.7.11.1)	DAPK1	P53355	1612
Cuscutae Semen	MOL000422	kaempferol	DNA-3-methyladenine glycosylase (EC 3.2.2.21) (3-alkyladenine DNA glycosylase) (3-methyladenine DNA glycosidase) (ADPG) (N-methylpurine-DNA glycosylase)	MPG	P29372	4350
Cuscutae Semen	MOL000422	kaempferol	Solute carrier family 22 member 12 (Organic anion transporter 4-like protein) (Renal-specific transporter) (RST) (Urate anion exchanger 1)	SLC22A12	Q96S37	116085
Cuscutae Semen	MOL000422	kaempferol	Cyclin-dependent kinase 6 (EC 2.7.11.22) (Cell division protein kinase 6) (Serine/threonine-protein kinase PLSTIRE)	CDK6	Q00534	1021
Cuscutae Semen	MOL000422	kaempferol	Cyclin-dependent kinase 2 (EC 2.7.11.22) (Cell division protein kinase 2) (p33 protein kinase)	CDK2	P24941	1017
Cuscutae Semen	MOL000422	kaempferol	Transthyretin (ATTR) (Prealbumin) (TBPA)	TTR	P02766	7276
Cuscutae Semen	MOL000422	kaempferol	Aldo-keto reductase family 1 member B10 (EC 1.1.1.300) (EC 1.1.1.54) (ARL-1) (Aldose reductase-like) (Aldose reductase-related protein) (ARP) (hARP) (Small intestine reductase) (SI reductase)	AKR1B10	O60218	57016
Cuscutae Semen	MOL000422	kaempferol	Poly [ADP-ribose] polymerase tankyrase-2 (EC 2.4.2.30) (ADP-ribosyltransferase diphtheria toxin-like 6) (ARTD6) (Poly [ADP-ribose] polymerase 5B) (Protein poly-ADP-ribosyltransferase tankyrase-2) (EC 2.4.2.-) (TNKS-2) (TRF1-interacting ankyrin-related ADP-ribose polymerase 2) (Tankyrase II) (Tankyrase-2) (TANK2) (Tankyrase-like protein) (Tankyrase-related protein)	TNKS2	Q9H2K2	80351
Cuscutae Semen	MOL000422	kaempferol	Poly [ADP-ribose] polymerase tankyrase-1 (EC 2.4.2.30) (ADP-ribosyltransferase diphtheria toxin-like 5) (ARTD5) (Poly [ADP-ribose] polymerase 5A) (Protein poly-ADP-ribosyltransferase tankyrase-1) (EC 2.4.2.-) (TNKS-1) (TRF1-interacting ankyrin-related ADP-ribose polymerase) (Tankyrase I) (Tankyrase-1) (TANK1)	TNKS	O95271	8658
Cuscutae Semen	MOL000422	kaempferol	Aromatase (EC 1.14.14.14) (CYPXIX) (Cytochrome P-450AROM) (Cytochrome P450 19A1) (Estrogen synthase)	CYP19A1	P11511	1588
Cuscutae Semen	MOL000422	kaempferol	Casein kinase II subunit alpha (CK II alpha) (EC 2.7.11.1)	CSNK2A1	P68400	1457
Cuscutae Semen	MOL000422	kaempferol	Epidermal growth factor receptor (EC 2.7.10.1) (Proto-oncogene c-ErbB-1) (Receptor tyrosine-protein kinase erbB-1)	EGFR	P00533	1956
Cuscutae Semen	MOL000422	kaempferol	Vasopressin V2 receptor (V2R) (AVPR V2) (Antidiuretic hormone receptor) (Renal-type arginine vasopressin receptor)	AVPR2	P30518	554
Cuscutae Semen	MOL000422	kaempferol	Insulin-like growth factor 1 receptor (EC 2.7.10.1) (Insulin-like growth factor I receptor) (IGF-I receptor) (CD antigen CD221) [Cleaved into: Insulin-like growth factor 1 receptor alpha chain; Insulin-like growth factor 1 receptor beta chain]	IGF1R	P08069	3480
Cuscutae Semen	MOL000422	kaempferol	Prothrombin (EC 3.4.21.5) (Coagulation factor II) [Cleaved into: Activation peptide fragment 1; Activation peptide fragment 2; Thrombin light chain; Thrombin heavy chain]	F2	P00734	2147
Cuscutae Semen	MOL000422	kaempferol	Serine/threonine-protein kinase pim-1 (EC 2.7.11.1)	PIM1	P11309	5292
Cuscutae Semen	MOL000422	kaempferol	Aurora kinase B (EC 2.7.11.1) (Aurora 1) (Aurora- and IPL1-like midbody-associated protein 1) (AIM-1) (Aurora/IPL1-related kinase 2) (ARK-2) (Aurora-related kinase 2) (STK-1) (Serine/threonine-protein kinase 12) (Serine/threonine-protein kinase 5) (Serine/threonine-protein kinase aurora-B)	AURKB	Q96GD4	9212
Cuscutae Semen	MOL000422	kaempferol	D(4) dopamine receptor (D(2C) dopamine receptor) (Dopamine D4 receptor)	DRD4	P21917	1815
Cuscutae Semen	MOL000422	kaempferol	Myeloperoxidase (MPO) (EC 1.11.2.2) [Cleaved into: Myeloperoxidase; 89 kDa myeloperoxidase; 84 kDa myeloperoxidase; Myeloperoxidase light chain; Myeloperoxidase heavy chain]	MPO	P05164	4353
Cuscutae Semen	MOL000422	kaempferol	Phosphatidylinositol 3-kinase regulatory subunit alpha (PI3-kinase regulatory subunit alpha) (PI3K regulatory subunit alpha) (PtdIns-3-kinase regulatory subunit alpha) (Phosphatidylinositol 3-kinase 85 kDa regulatory subunit alpha) (PI3-kinase subunit p85-alpha) (PtdIns-3-kinase regulatory subunit p85-alpha)	PIK3R1	P27986	5295
Cuscutae Semen	MOL000422	kaempferol	Glycogen phosphorylase, liver form (EC 2.4.1.1)	PYGL	P06737	5836
Cuscutae Semen	MOL000422	kaempferol	Carbonic anhydrase 1 (EC 4.2.1.1) (Carbonate dehydratase I) (Carbonic anhydrase B) (CAB) (Carbonic anhydrase I) (CA-I)	CA1	P00915	759
Cuscutae Semen	MOL000422	kaempferol	Proto-oncogene tyrosine-protein kinase Src (EC 2.7.10.2) (Proto-oncogene c-Src) (pp60c-src) (p60-Src)	SRC	P12931	6714
Cuscutae Semen	MOL000422	kaempferol	Focal adhesion kinase 1 (FADK 1) (EC 2.7.10.2) (Focal adhesion kinase-related nonkinase) (FRNK) (Protein phosphatase 1 regulatory subunit 71) (PPP1R71) (Protein-tyrosine kinase 2) (p125FAK) (pp125FAK)	PTK2	Q05397	5747
Cuscutae Semen	MOL000422	kaempferol	Vascular endothelial growth factor receptor 2 (VEGFR-2) (EC 2.7.10.1) (Fetal liver kinase 1) (FLK-1) (Kinase insert domain receptor) (KDR) (Protein-tyrosine kinase receptor flk-1) (CD antigen CD309)	KDR	P35968	3791
Cuscutae Semen	MOL000422	kaempferol	Collagenase 3 (EC 3.4.24.-) (Matrix metalloproteinase-13) (MMP-13)	MMP13	P45452	4322
Cuscutae Semen	MOL000422	kaempferol	Stromelysin-1 (SL-1) (EC 3.4.24.17) (Matrix metalloproteinase-3) (MMP-3) (Transin-1)	MMP3	P08254	4314
Cuscutae Semen	MOL000422	kaempferol	Carbonic anhydrase 3 (EC 4.2.1.1) (Carbonate dehydratase III) (Carbonic anhydrase III) (CA-III)	CA3	P07451	761
Cuscutae Semen	MOL000422	kaempferol	Serine/threonine-protein kinase PLK1 (EC 2.7.11.21) (Polo-like kinase 1) (PLK-1) (Serine/threonine-protein kinase 13) (STPK13)	PLK1	P53350	5347
Cuscutae Semen	MOL000422	kaempferol	Carbonic anhydrase 6 (EC 4.2.1.1) (Carbonate dehydratase VI) (Carbonic anhydrase VI) (CA-VI) (Salivary carbonic anhydrase) (Secreted carbonic anhydrase)	CA6	P23280	765
Cuscutae Semen	MOL000422	kaempferol	Cyclin-dependent kinase 1 (CDK1) (EC 2.7.11.22) (EC 2.7.11.23) (Cell division control protein 2 homolog) (Cell division protein kinase 1) (p34 protein kinase)	CDK1	P06493	983
Cuscutae Semen	MOL000422	kaempferol	Serine/threonine-protein kinase N1 (EC 2.7.11.13) (Protease-activated kinase 1) (PAK-1) (Protein kinase C-like 1) (Protein kinase C-like PKN) (Protein kinase PKN-alpha) (Protein-kinase C-related kinase 1) (Serine-threonine protein kinase N)	PKN1	Q16512	5585
Cuscutae Semen	MOL000422	kaempferol	Carbonic anhydrase 14 (EC 4.2.1.1) (Carbonate dehydratase XIV) (Carbonic anhydrase XIV) (CA-XIV)	CA14	Q9ULX7	23632
Cuscutae Semen	MOL000422	kaempferol	Carbonic anhydrase 9 (EC 4.2.1.1) (Carbonate dehydratase IX) (Carbonic anhydrase IX) (CA-IX) (CAIX) (Membrane antigen MN) (P54/58N) (Renal cell carcinoma-associated antigen G250) (RCC-associated antigen G250) (pMW1)	CA9	Q16790	768
Cuscutae Semen	MOL000422	kaempferol	Hepatocyte growth factor receptor (HGF receptor) (EC 2.7.10.1) (HGF/SF receptor) (Proto-oncogene c-Met) (Scatter factor receptor) (SF receptor) (Tyrosine-protein kinase Met)	MET	P08581	4233
Cuscutae Semen	MOL000422	kaempferol	Serine/threonine-protein kinase Nek2 (EC 2.7.11.1) (HSPK 21) (Never in mitosis A-related kinase 2) (NimA-related protein kinase 2) (NimA-like protein kinase 1)	NEK2	P51955	4751
Cuscutae Semen	MOL000422	kaempferol	C-X-C chemokine receptor type 1 (CXC-R1) (CXCR-1) (CDw128a) (High affinity interleukin-8 receptor A) (IL-8R A) (IL-8 receptor type 1) (CD antigen CD181)	CXCR1	P25024	3577
Cuscutae Semen	MOL000422	kaempferol	Calcium/calmodulin-dependent protein kinase type II subunit beta (CaM kinase II subunit beta) (CaMK-II subunit beta) (EC 2.7.11.17)	CAMK2B	Q13554	816
Cuscutae Semen	MOL000422	kaempferol	ALK tyrosine kinase receptor (EC 2.7.10.1) (Anaplastic lymphoma kinase) (CD antigen CD246)	ALK	Q9UM73	238
Cuscutae Semen	MOL000422	kaempferol	RAC-alpha serine/threonine-protein kinase (EC 2.7.11.1) (Protein kinase B) (PKB) (Protein kinase B alpha) (PKB alpha) (Proto-oncogene c-Akt) (RAC-PK-alpha)	AKT1	P31749	207
Cuscutae Semen	MOL000422	kaempferol	Serine/threonine-protein kinase Nek6 (EC 2.7.11.1) (Never in mitosis A-related kinase 6) (NimA-related protein kinase 6) (Protein kinase SID6-1512)	NEK6	Q9HC98	10783
Cuscutae Semen	MOL000422	kaempferol	Phospholipase A2 (EC 3.1.1.4) (Group IB phospholipase A2) (Phosphatidylcholine 2-acylhydrolase 1B)	PLA2G1B	P04054	5319
Cuscutae Semen	MOL000422	kaempferol	Carbonic anhydrase 5A, mitochondrial (EC 4.2.1.1) (Carbonate dehydratase VA) (Carbonic anhydrase VA) (CA-VA)	CA5A	P35218	763
Cuscutae Semen	MOL000422	kaempferol	Beta-secretase 1 (EC 3.4.23.46) (Aspartyl protease 2) (ASP2) (Asp 2) (Beta-site amyloid precursor protein cleaving enzyme 1) (Beta-site APP cleaving enzyme 1) (Memapsin-2) (Membrane-associated aspartic protease 2)	BACE1	P56817	23621
Cuscutae Semen	MOL000422	kaempferol	Tyrosine-protein kinase receptor UFO (EC 2.7.10.1) (AXL oncogene)	AXL	P30530	558
Cuscutae Semen	MOL000422	kaempferol	NUAK family SNF1-like kinase 1 (EC 2.7.11.1) (AMPK-related protein kinase 5) (ARK5) (Omphalocele kinase 1)	NUAK1	O60285	9891
Cuscutae Semen	MOL000422	kaempferol	Aldo-keto reductase family 1 member C2 (EC 1.-.-.-) (3-alpha-HSD3) (Chlordecone reductase homolog HAKRD) (Dihydrodiol dehydrogenase 2) (DD-2) (DD2) (Dihydrodiol dehydrogenase/bile acid-binding protein) (DD/BABP) (Trans-1,2-dihydrobenzene-1,2-diol dehydrogenase) (EC 1.3.1.20) (Type III 3-alpha-hydroxysteroid dehydrogenase) (EC 1.1.1.357)	AKR1C2	P52895	1646
Cuscutae Semen	MOL000422	kaempferol	Aldo-keto reductase family 1 member C1 (EC 1.1.1.-) (20-alpha-hydroxysteroid dehydrogenase) (20-alpha-HSD) (EC 1.1.1.149) (Chlordecone reductase homolog HAKRC) (Dihydrodiol dehydrogenase 1/2) (DD1/DD2) (High-affinity hepatic bile acid-binding protein) (HBAB) (Indanol dehydrogenase) (EC 1.1.1.112) (Trans-1,2-dihydrobenzene-1,2-diol dehydrogenase) (EC 1.3.1.20)	AKR1C1	Q04828	1645
Cuscutae Semen	MOL000422	kaempferol	Aldo-keto reductase family 1 member C3 (EC 1.-.-.-) (17-beta-hydroxysteroid dehydrogenase type 5) (17-beta-HSD 5) (3-alpha-HSD type II, brain) (3-alpha-hydroxysteroid dehydrogenase type 2) (3-alpha-HSD type 2) (EC 1.1.1.357) (Chlordecone reductase homolog HAKRb) (Dihydrodiol dehydrogenase 3) (DD-3) (DD3) (Dihydrodiol dehydrogenase type I) (HA1753) (Indanol dehydrogenase) (EC 1.1.1.112) (Prostagla…	AKR1C3	P42330	8644
Cuscutae Semen	MOL000422	kaempferol	Aldo-keto reductase family 1 member C4 (EC 1.1.1.-) (3-alpha-HSD1) (3-alpha-hydroxysteroid dehydrogenase type I) (EC 1.1.1.357) (Chlordecone reductase) (CDR) (EC 1.1.1.225) (Dihydrodiol dehydrogenase 4) (DD-4) (DD4) (HAKRA)	AKR1C4	P17516	1109
Cuscutae Semen	MOL000422	kaempferol	Carbonic anhydrase 13 (EC 4.2.1.1) (Carbonate dehydratase XIII) (Carbonic anhydrase XIII) (CA-XIII)	CA13	Q8N1Q1	377677
Cuscutae Semen	MOL000422	kaempferol	Aldo-keto reductase family 1 member A1 (EC 1.1.1.2) (EC 1.1.1.372) (EC 1.1.1.54) (Alcohol dehydrogenase [NADP(+)]) (Aldehyde reductase) (Glucuronate reductase) (EC 1.1.1.19) (Glucuronolactone reductase) (EC 1.1.1.20)	AKR1A1	P14550	10327
Cuscutae Semen	MOL000422	kaempferol	Amyloid-beta precursor protein (APP) (ABPP) (APPI) (Alzheimer disease amyloid protein) (Amyloid precursor protein) (Amyloid-beta A4 protein) (Cerebral vascular amyloid peptide) (CVAP) (PreA4) (Protease nexin-II) (PN-II) [Cleaved into: N-APP; Soluble APP-alpha (S-APP-alpha); Soluble APP-beta (S-APP-beta); C99 (Beta-secretase C-terminal fragment) (Beta-CTF); Amyloid-beta protein 42 (Abeta42) (Beta-…	APP	P05067	351
Cuscutae Semen	MOL000422	kaempferol	Poly [ADP-ribose] polymerase 1 (PARP-1) (EC 2.4.2.30) (ADP-ribosyltransferase diphtheria toxin-like 1) (ARTD1) (DNA ADP-ribosyltransferase PARP1) (EC 2.4.2.-) (NAD(+) ADP-ribosyltransferase 1) (ADPRT 1) (Poly[ADP-ribose] synthase 1) (Protein poly-ADP-ribosyltransferase PARP1) (EC 2.4.2.-)	PARP1	P09874	142
Cuscutae Semen	MOL000422	kaempferol	Macrophage metalloelastase (MME) (EC 3.4.24.65) (Macrophage elastase) (ME) (hME) (Matrix metalloproteinase-12) (MMP-12)	MMP12	P39900	4321
Cuscutae Semen	MOL000422	kaempferol	ADP-ribosyl cyclase/cyclic ADP-ribose hydrolase 1 (EC 3.2.2.6) (2'-phospho-ADP-ribosyl cyclase) (2'-phospho-ADP-ribosyl cyclase/2'-phospho-cyclic-ADP-ribose transferase) (EC 2.4.99.20) (2'-phospho-cyclic-ADP-ribose transferase) (ADP-ribosyl cyclase 1) (ADPRC 1) (Cyclic ADP-ribose hydrolase 1) (cADPr hydrolase 1) (T10) (CD antigen CD38)	CD38	P28907	952
Cuscutae Semen	MOL000422	kaempferol	DNA topoisomerase 1 (EC 5.6.2.1) (DNA topoisomerase I)	TOP1	P11387	7150
Cuscutae Semen	MOL000422	kaempferol	Estrogen receptor (ER) (ER-alpha) (Estradiol receptor) (Nuclear receptor subfamily 3 group A member 1)	ESR1	P03372	2099
Cuscutae Semen	MOL000422	kaempferol	Prostaglandin G/H synthase 2 (EC 1.14.99.1) (Cyclooxygenase-2) (COX-2) (PHS II) (Prostaglandin H2 synthase 2) (PGH synthase 2) (PGHS-2) (Prostaglandin-endoperoxide synthase 2)	PTGS2	P35354	5743
Cuscutae Semen	MOL000422	kaempferol	Cystic fibrosis transmembrane conductance regulator (CFTR) (ATP-binding cassette sub-family C member 7) (Channel conductance-controlling ATPase) (EC 5.6.1.6) (cAMP-dependent chloride channel)	CFTR	P13569	1080
Cuscutae Semen	MOL000422	kaempferol	6-phosphofructo-2-kinase/fructose-2,6-bisphosphatase 3 (6PF-2-K/Fru-2,6-P2ase 3) (PFK/FBPase 3) (6PF-2-K/Fru-2,6-P2ase brain/placenta-type isozyme) (Renal carcinoma antigen NY-REN-56) (iPFK-2) [Includes: 6-phosphofructo-2-kinase (EC 2.7.1.105); Fructose-2,6-bisphosphatase (EC 3.1.3.46)]	PFKFB3	Q16875	5209
Cuscutae Semen	MOL000422	kaempferol	Alpha-amylase 1 (EC 3.2.1.1) (1,4-alpha-D-glucan glucanohydrolase 1) (Salivary alpha-amylase)	AMY1A	P04745	276,277,278
Cuscutae Semen	MOL000422	kaempferol	G protein-coupled receptor kinase 6 (EC 2.7.11.16) (G protein-coupled receptor kinase GRK6)	GRK6	P43250	2870
Cuscutae Semen	MOL000422	kaempferol	Telomerase reverse transcriptase (EC 2.7.7.49) (HEST2) (Telomerase catalytic subunit) (Telomerase-associated protein 2) (TP2)	TERT	O14746	7015
Cuscutae Semen	MOL000422	kaempferol	Cholinesterase (EC 3.1.1.8) (Acylcholine acylhydrolase) (Butyrylcholine esterase) (Choline esterase II) (Pseudocholinesterase)	BCHE	P06276	590
Cuscutae Semen	MOL000358	beta-sitosterol	Androgen receptor (Dihydrotestosterone receptor) (Nuclear receptor subfamily 3 group C member 4)	AR	P10275	367
Cuscutae Semen	MOL000358	beta-sitosterol	3-hydroxy-3-methylglutaryl-coenzyme A reductase (HMG-CoA reductase) (EC 1.1.1.34)	HMGCR	P04035	3156
Cuscutae Semen	MOL000358	beta-sitosterol	Lanosterol 14-alpha demethylase (LDM) (EC 1.14.14.154) (CYPLI) (Cytochrome P450 51A1) (Cytochrome P450-14DM) (Cytochrome P45014DM) (Cytochrome P450LI) (Sterol 14-alpha demethylase)	CYP51A1	Q16850	1595
Cuscutae Semen	MOL000358	beta-sitosterol	NPC1-like intracellular cholesterol transporter 1 (Niemann-Pick C1-like protein 1)	NPC1L1	Q9UHC9	29881
Cuscutae Semen	MOL000358	beta-sitosterol	Oxysterols receptor LXR-alpha (Liver X receptor alpha) (Nuclear receptor subfamily 1 group H member 3)	NR1H3	Q13133	10062
Cuscutae Semen	MOL000358	beta-sitosterol	Aromatase (EC 1.14.14.14) (CYPXIX) (Cytochrome P-450AROM) (Cytochrome P450 19A1) (Estrogen synthase)	CYP19A1	P11511	1588
Cuscutae Semen	MOL000358	beta-sitosterol	Steroid 17-alpha-hydroxylase/17,20 lyase (EC 1.14.14.19) (17-alpha-hydroxyprogesterone aldolase) (EC 1.14.14.32) (CYPXVII) (Cytochrome P450 17A1) (Cytochrome P450-C17) (Cytochrome P450c17) (Steroid 17-alpha-monooxygenase)	CYP17A1	P05093	1586
Cuscutae Semen	MOL000358	beta-sitosterol	Nuclear receptor ROR-gamma (Nuclear receptor RZR-gamma) (Nuclear receptor subfamily 1 group F member 3) (RAR-related orphan receptor C) (Retinoid-related orphan receptor-gamma)	RORC	P51449	6097
Cuscutae Semen	MOL000358	beta-sitosterol	Estrogen receptor (ER) (ER-alpha) (Estradiol receptor) (Nuclear receptor subfamily 3 group A member 1)	ESR1	P03372	2099
Cuscutae Semen	MOL000358	beta-sitosterol	Estrogen receptor beta (ER-beta) (Nuclear receptor subfamily 3 group A member 2)	ESR2	Q92731	2100
Cuscutae Semen	MOL000358	beta-sitosterol	Sterol regulatory element-binding protein 2 (SREBP-2) (Class D basic helix-loop-helix protein 2) (bHLHd2) (Sterol regulatory element-binding transcription factor 2) [Cleaved into: Processed sterol regulatory element-binding protein 2]	SREBF2	Q12772	6721
Cuscutae Semen	MOL000358	beta-sitosterol	Sex hormone-binding globulin (SHBG) (Sex steroid-binding protein) (SBP) (Testis-specific androgen-binding protein) (ABP) (Testosterone-estradiol-binding globulin) (TeBG) (Testosterone-estrogen-binding globulin)	SHBG	P04278	6462
Cuscutae Semen	MOL000358	beta-sitosterol	Sodium-dependent noradrenaline transporter (Norepinephrine transporter) (NET) (Solute carrier family 6 member 2)	SLC6A2	P23975	6530
Cuscutae Semen	MOL000358	beta-sitosterol	Cytochrome P450 2C19 (EC 1.14.14.1) ((R)-limonene 6-monooxygenase) (EC 1.14.14.53) ((S)-limonene 6-monooxygenase) (EC 1.14.14.51) ((S)-limonene 7-monooxygenase) (EC 1.14.14.52) (CYPIIC17) (CYPIIC19) (Cytochrome P450-11A) (Cytochrome P450-254C) (Fenbendazole monooxygenase (4'-hydroxylating)) (EC 1.14.14.75) (Mephenytoin 4-hydroxylase)	CYP2C19	P33261	1557
Cuscutae Semen	MOL000358	beta-sitosterol	Nuclear receptor ROR-alpha (Nuclear receptor RZR-alpha) (Nuclear receptor subfamily 1 group F member 1) (RAR-related orphan receptor A) (Retinoid-related orphan receptor-alpha)	RORA	P35398	6095
Cuscutae Semen	MOL000358	beta-sitosterol	Tyrosine-protein phosphatase non-receptor type 1 (EC 3.1.3.48) (Protein-tyrosine phosphatase 1B) (PTP-1B)	PTPN1	P18031	5770
Cuscutae Semen	MOL000358	beta-sitosterol	Cholinesterase (EC 3.1.1.8) (Acylcholine acylhydrolase) (Butyrylcholine esterase) (Choline esterase II) (Pseudocholinesterase)	BCHE	P06276	590
Cuscutae Semen	MOL000358	beta-sitosterol	Corticosteroid-binding globulin (CBG) (Serpin A6) (Transcortin)	SERPINA6	P08185	866
Cuscutae Semen	MOL000358	beta-sitosterol	Sodium-dependent serotonin transporter (SERT) (5HT transporter) (5HTT) (Solute carrier family 6 member 4)	SLC6A4	P31645	6532
Cuscutae Semen	MOL000358	beta-sitosterol	Muscarinic acetylcholine receptor M2	CHRM2	P08172	1129
Cuscutae Semen	MOL000358	beta-sitosterol	Vitamin D3 receptor (VDR) (1,25-dihydroxyvitamin D3 receptor) (Nuclear receptor subfamily 1 group I member 1)	VDR	P11473	7421
Cuscutae Semen	MOL000358	beta-sitosterol	Acetylcholinesterase (AChE) (EC 3.1.1.7)	ACHE	P22303	43
Cuscutae Semen	MOL000358	beta-sitosterol	Glucose-6-phosphate 1-dehydrogenase (G6PD) (EC 1.1.1.49)	G6PD	P11413	2539
Cuscutae Semen	MOL000358	beta-sitosterol	Oxysterols receptor LXR-beta (Liver X receptor beta) (Nuclear receptor NER) (Nuclear receptor subfamily 1 group H member 2) (Ubiquitously-expressed nuclear receptor)	NR1H2	P55055	7376
Cuscutae Semen	MOL000358	beta-sitosterol	Glycine receptor subunit alpha-1 (Glycine receptor 48 kDa subunit) (Glycine receptor strychnine-binding subunit)	GLRA1	P23415	2741
Cuscutae Semen	MOL000358	beta-sitosterol	Cocaine esterase (EC 3.1.1.84) (Carboxylesterase 2) (CE-2) (hCE-2) (EC 3.1.1.1) (Methylumbelliferyl-acetate deacetylase 2) (EC 3.1.1.56)	CES2	O00748	8824
Cuscutae Semen	MOL000358	beta-sitosterol	Prostaglandin E2 receptor EP1 subtype (PGE receptor EP1 subtype) (PGE2 receptor EP1 subtype) (Prostanoid EP1 receptor)	PTGER1	P34995	5731
Cuscutae Semen	MOL000358	beta-sitosterol	Prostaglandin E2 receptor EP2 subtype (PGE receptor EP2 subtype) (PGE2 receptor EP2 subtype) (Prostanoid EP2 receptor)	PTGER2	P43116	5732
Cuscutae Semen	MOL000358	beta-sitosterol	Corticosteroid 11-beta-dehydrogenase isozyme 1 (EC 1.1.1.146) (11-beta-hydroxysteroid dehydrogenase 1) (11-DH) (11-beta-HSD1) (Short chain dehydrogenase/reductase family 26C member 1)	HSD11B1	P28845	3290
Cuscutae Semen	MOL000358	beta-sitosterol	Prostaglandin E synthase (EC 5.3.99.3) (Microsomal glutathione S-transferase 1-like 1) (MGST1-L1) (Microsomal prostaglandin E synthase 1) (MPGES-1) (p53-induced gene 12 protein)	PTGES	O14684	9536
Cuscutae Semen	MOL000358	beta-sitosterol	M-phase inducer phosphatase 1 (EC 3.1.3.48) (Dual specificity phosphatase Cdc25A)	CDC25A	P30304	993
Cuscutae Semen	MOL000358	beta-sitosterol	Peroxisome proliferator-activated receptor alpha (PPAR-alpha) (Nuclear receptor subfamily 1 group C member 1)	PPARA	Q07869	5465
Cuscutae Semen	MOL000358	beta-sitosterol	Peroxisome proliferator-activated receptor delta (PPAR-delta) (NUCI) (Nuclear hormone receptor 1) (NUC1) (Nuclear receptor subfamily 1 group C member 2) (Peroxisome proliferator-activated receptor beta) (PPAR-beta)	PPARD	Q03181	5467
Cuscutae Semen	MOL000358	beta-sitosterol	7-dehydrocholesterol reductase (7-DHC reductase) (EC 1.3.1.21) (Delta7-sterol reductase) (Sterol Delta(7)-reductase) (Sterol reductase SR-2)	DHCR7	Q9UBM7	1717
Cuscutae Semen	MOL000358	beta-sitosterol	Squalene monooxygenase (EC 1.14.14.17) (Squalene epoxidase) (SE)	SQLE	Q14534	6713
Cuscutae Semen	MOL000358	beta-sitosterol	Tyrosine-protein phosphatase non-receptor type 6 (EC 3.1.3.48) (Hematopoietic cell protein-tyrosine phosphatase) (Protein-tyrosine phosphatase 1C) (PTP-1C) (Protein-tyrosine phosphatase SHP-1) (SH-PTP1)	PTPN6	P29350	5777
Cuscutae Semen	MOL000358	beta-sitosterol	Nuclear receptor subfamily 1 group I member 3 (Constitutive activator of retinoid response) (Constitutive active response) (Constitutive androstane receptor) (CAR) (Orphan nuclear receptor MB67)	NR1I3	Q14994	9970
Cuscutae Semen	MOL000358	beta-sitosterol	Squalene synthase (SQS) (SS) (EC 2.5.1.21) (FPP:FPP farnesyltransferase) (Farnesyl-diphosphate farnesyltransferase) (Farnesyl-diphosphate farnesyltransferase 1)	FDFT1	P37268	2222
Cuscutae Semen	MOL000358	beta-sitosterol	Sigma non-opioid intracellular receptor 1 (Aging-associated gene 8 protein) (SR31747-binding protein) (SR-BP) (Sigma 1-type opioid receptor) (SIG-1R) (Sigma1-receptor) (Sigma1R) (hSigmaR1)	SIGMAR1	Q99720	10280
Cuscutae Semen	MOL000358	beta-sitosterol	Nitric oxide synthase, inducible (EC 1.14.13.39) (Hepatocyte NOS) (HEP-NOS) (Inducible NO synthase) (Inducible NOS) (iNOS) (NOS type II) (Peptidyl-cysteine S-nitrosylase NOS2)	NOS2	P35228	4843
Cuscutae Semen	MOL000358	beta-sitosterol	Glucocorticoid receptor (GR) (Nuclear receptor subfamily 3 group C member 1)	NR3C1	P04150	2908
Cuscutae Semen	MOL000358	beta-sitosterol	Peroxisome proliferator-activated receptor gamma (PPAR-gamma) (Nuclear receptor subfamily 1 group C member 3)	PPARG	P37231	5468
Cuscutae Semen	MOL000358	beta-sitosterol	M-phase inducer phosphatase 2 (EC 3.1.3.48) (Dual specificity phosphatase Cdc25B)	CDC25B	P30305	994
Cuscutae Semen	MOL000358	beta-sitosterol	UDP-glucuronosyltransferase 2B7 (UDPGT 2B7) (EC 2.4.1.17) (3,4-catechol estrogen-specific UDPGT) (UDP-glucuronosyltransferase 2B9) (UDPGT 2B9) (UDPGTh-2)	UGT2B7	P16662	7364
Cuscutae Semen	MOL000358	beta-sitosterol	Corticosteroid 11-beta-dehydrogenase isozyme 2 (EC 1.1.1.-) (11-beta-hydroxysteroid dehydrogenase type 2) (11-DH2) (11-beta-HSD2) (11-beta-hydroxysteroid dehydrogenase type II) (11-HSD type II) (11-beta-HSD type II) (NAD-dependent 11-beta-hydroxysteroid dehydrogenase) (11-beta-HSD) (Short chain dehydrogenase/reductase family 9C member 3)	HSD11B2	P80365	3291
Cuscutae Semen	MOL000358	beta-sitosterol	DNA polymerase beta (EC 2.7.7.7) (EC 4.2.99.-)	POLB	P06746	5423
Mori Fructus	MOL000737	morin	G-protein coupled receptor 35 (Kynurenic acid receptor) (KYNA receptor)	GPR35	Q9HC97	2859
Mori Fructus	MOL000737	morin	Receptor-type tyrosine-protein phosphatase S (R-PTP-S) (EC 3.1.3.48) (Receptor-type tyrosine-protein phosphatase sigma) (R-PTP-sigma)	PTPRS	Q13332	5802
Mori Fructus	MOL000737	morin	Estrogen receptor beta (ER-beta) (Nuclear receptor subfamily 3 group A member 2)	ESR2	Q92731	2100
Mori Fructus	MOL000737	morin	Death-associated protein kinase 1 (DAP kinase 1) (EC 2.7.11.1)	DAPK1	P53355	1612
Mori Fructus	MOL000737	morin	DNA-3-methyladenine glycosylase (EC 3.2.2.21) (3-alkyladenine DNA glycosylase) (3-methyladenine DNA glycosidase) (ADPG) (N-methylpurine-DNA glycosylase)	MPG	P29372	4350
Mori Fructus	MOL000737	morin	Solute carrier family 22 member 12 (Organic anion transporter 4-like protein) (Renal-specific transporter) (RST) (Urate anion exchanger 1)	SLC22A12	Q96S37	116085
Mori Fructus	MOL000737	morin	NADPH oxidase 4 (EC 1.6.3.-) (Kidney oxidase-1) (KOX-1) (Kidney superoxide-producing NADPH oxidase) (Renal NAD(P)H-oxidase)	NOX4	Q9NPH5	50507
Mori Fructus	MOL000737	morin	Aldo-keto reductase family 1 member B1 (EC 1.1.1.300) (EC 1.1.1.372) (EC 1.1.1.54) (Aldehyde reductase) (Aldose reductase) (AR) (EC 1.1.1.21)	AKR1B1	P15121	231
Mori Fructus	MOL000737	morin	Xanthine dehydrogenase/oxidase [Includes: Xanthine dehydrogenase (XD) (EC 1.17.1.4); Xanthine oxidase (XO) (EC 1.17.3.2) (Xanthine oxidoreductase) (XOR)]	XDH	P47989	7498
Mori Fructus	MOL000737	morin	Receptor-type tyrosine-protein kinase FLT3 (EC 2.7.10.1) (FL cytokine receptor) (Fetal liver kinase-2) (FLK-2) (Fms-like tyrosine kinase 3) (FLT-3) (Stem cell tyrosine kinase 1) (STK-1) (CD antigen CD135)	FLT3	P36888	2322
Mori Fructus	MOL000737	morin	Carbonic anhydrase 2 (EC 4.2.1.1) (Carbonate dehydratase II) (Carbonic anhydrase C) (CAC) (Carbonic anhydrase II) (CA-II)	CA2	P00918	760
Mori Fructus	MOL000737	morin	Polyunsaturated fatty acid 5-lipoxygenase (EC 1.13.11.-) (Arachidonate 5-lipoxygenase) (5-LO) (5-lipoxygenase) (EC 1.13.11.34)	ALOX5	P09917	240
Mori Fructus	MOL000737	morin	Carbonic anhydrase 7 (EC 4.2.1.1) (Carbonate dehydratase VII) (Carbonic anhydrase VII) (CA-VII)	CA7	P43166	766
Mori Fructus	MOL000737	morin	Estradiol 17-beta-dehydrogenase 2 (EC 1.1.1.62) (17-beta-hydroxysteroid dehydrogenase type 2) (17-beta-HSD 2) (20 alpha-hydroxysteroid dehydrogenase) (20-alpha-HSD) (E2DH) (Microsomal 17-beta-hydroxysteroid dehydrogenase) (Short chain dehydrogenase/reductase family 9C member 2) (Testosterone 17-beta-dehydrogenase) (EC 1.1.1.239)	HSD17B2	P37059	3294
Mori Fructus	MOL000737	morin	Multidrug resistance-associated protein 1 (EC 7.6.2.2) (ATP-binding cassette sub-family C member 1) (Glutathione-S-conjugate-translocating ATPase ABCC1) (EC 7.6.2.3) (Leukotriene C(4) transporter) (LTC4 transporter)	ABCC1	P33527	4363
Mori Fructus	MOL000737	morin	Carbonic anhydrase 12 (EC 4.2.1.1) (Carbonate dehydratase XII) (Carbonic anhydrase XII) (CA-XII) (Tumor antigen HOM-RCC-3.1.3)	CA12	O43570	771
Mori Fructus	MOL000737	morin	ATP-dependent translocase ABCB1 (ATP-binding cassette sub-family B member 1) (Multidrug resistance protein 1) (EC 7.6.2.2) (P-glycoprotein 1) (Phospholipid transporter ABCB1) (EC 7.6.2.1) (CD antigen CD243)	ABCB1	P08183	5243
Mori Fructus	MOL000737	morin	Cytochrome P450 1B1 (EC 1.14.14.1) (CYPIB1) (Hydroperoxy icosatetraenoate dehydratase) (EC 4.2.1.152)	CYP1B1	Q16678	1545
Mori Fructus	MOL000737	morin	Broad substrate specificity ATP-binding cassette transporter ABCG2 (EC 7.6.2.2) (ATP-binding cassette sub-family G member 2) (Breast cancer resistance protein) (CDw338) (Mitoxantrone resistance-associated protein) (Placenta-specific ATP-binding cassette transporter) (Urate exporter) (CD antigen CD338)	ABCG2	Q9UNQ0	9429
Mori Fructus	MOL000737	morin	Adenosine receptor A1	ADORA1	P30542	134
Mori Fructus	MOL000737	morin	Adenosine receptor A2a	ADORA2A	P29274	135
Mori Fructus	MOL000737	morin	Carbonic anhydrase 4 (EC 4.2.1.1) (Carbonate dehydratase IV) (Carbonic anhydrase IV) (CA-IV)	CA4	P22748	762
Mori Fructus	MOL000737	morin	Polyunsaturated fatty acid lipoxygenase ALOX15 (12/15-lipoxygenase) (Arachidonate 12-lipoxygenase, leukocyte-type) (12-LOX) (EC 1.13.11.31) (Arachidonate 15-lipoxygenase) (15-LOX) (15-LOX-1) (EC 1.13.11.33) (Arachidonate omega-6 lipoxygenase) (Hepoxilin A3 synthase Alox15) (EC 1.13.11.-) (Linoleate 13S-lipoxygenase) (EC 1.13.11.12)	ALOX15	P16050	246
Mori Fructus	MOL000737	morin	Vasopressin V2 receptor (V2R) (AVPR V2) (Antidiuretic hormone receptor) (Renal-type arginine vasopressin receptor)	AVPR2	P30518	554
Mori Fructus	MOL000737	morin	Amine oxidase [flavin-containing] A (EC 1.4.3.4) (Monoamine oxidase type A) (MAO-A)	MAOA	P21397	4128
Mori Fructus	MOL000737	morin	Insulin-like growth factor 1 receptor (EC 2.7.10.1) (Insulin-like growth factor I receptor) (IGF-I receptor) (CD antigen CD221) [Cleaved into: Insulin-like growth factor 1 receptor alpha chain; Insulin-like growth factor 1 receptor beta chain]	IGF1R	P08069	3480
Mori Fructus	MOL000737	morin	Aromatase (EC 1.14.14.14) (CYPXIX) (Cytochrome P-450AROM) (Cytochrome P450 19A1) (Estrogen synthase)	CYP19A1	P11511	1588
Mori Fructus	MOL000737	morin	Epidermal growth factor receptor (EC 2.7.10.1) (Proto-oncogene c-ErbB-1) (Receptor tyrosine-protein kinase erbB-1)	EGFR	P00533	1956
Mori Fructus	MOL000737	morin	Prothrombin (EC 3.4.21.5) (Coagulation factor II) [Cleaved into: Activation peptide fragment 1; Activation peptide fragment 2; Thrombin light chain; Thrombin heavy chain]	F2	P00734	2147
Mori Fructus	MOL000737	morin	Serine/threonine-protein kinase pim-1 (EC 2.7.11.1)	PIM1	P11309	5292
Mori Fructus	MOL000737	morin	Aurora kinase B (EC 2.7.11.1) (Aurora 1) (Aurora- and IPL1-like midbody-associated protein 1) (AIM-1) (Aurora/IPL1-related kinase 2) (ARK-2) (Aurora-related kinase 2) (STK-1) (Serine/threonine-protein kinase 12) (Serine/threonine-protein kinase 5) (Serine/threonine-protein kinase aurora-B)	AURKB	Q96GD4	9212
Mori Fructus	MOL000737	morin	D(4) dopamine receptor (D(2C) dopamine receptor) (Dopamine D4 receptor)	DRD4	P21917	1815
Mori Fructus	MOL000737	morin	Lactoylglutathione lyase (EC 4.4.1.5) (Aldoketomutase) (Glyoxalase I) (Glx I) (Ketone-aldehyde mutase) (Methylglyoxalase) (S-D-lactoylglutathione methylglyoxal lyase)	GLO1	Q04760	2739
Mori Fructus	MOL000737	morin	Myeloperoxidase (MPO) (EC 1.11.2.2) [Cleaved into: Myeloperoxidase; 89 kDa myeloperoxidase; 84 kDa myeloperoxidase; Myeloperoxidase light chain; Myeloperoxidase heavy chain]	MPO	P05164	4353
Mori Fructus	MOL000737	morin	Phosphatidylinositol 3-kinase regulatory subunit alpha (PI3-kinase regulatory subunit alpha) (PI3K regulatory subunit alpha) (PtdIns-3-kinase regulatory subunit alpha) (Phosphatidylinositol 3-kinase 85 kDa regulatory subunit alpha) (PI3-kinase subunit p85-alpha) (PtdIns-3-kinase regulatory subunit p85-alpha)	PIK3R1	P27986	5295
Mori Fructus	MOL000737	morin	Glycogen phosphorylase, liver form (EC 2.4.1.1)	PYGL	P06737	5836
Mori Fructus	MOL000737	morin	Carbonic anhydrase 1 (EC 4.2.1.1) (Carbonate dehydratase I) (Carbonic anhydrase B) (CAB) (Carbonic anhydrase I) (CA-I)	CA1	P00915	759
Mori Fructus	MOL000737	morin	Glycogen synthase kinase-3 beta (GSK-3 beta) (EC 2.7.11.26) (Serine/threonine-protein kinase GSK3B) (EC 2.7.11.1)	GSK3B	P49841	2932
Mori Fructus	MOL000737	morin	Proto-oncogene tyrosine-protein kinase Src (EC 2.7.10.2) (Proto-oncogene c-Src) (pp60c-src) (p60-Src)	SRC	P12931	6714
Mori Fructus	MOL000737	morin	Focal adhesion kinase 1 (FADK 1) (EC 2.7.10.2) (Focal adhesion kinase-related nonkinase) (FRNK) (Protein phosphatase 1 regulatory subunit 71) (PPP1R71) (Protein-tyrosine kinase 2) (p125FAK) (pp125FAK)	PTK2	Q05397	5747
Mori Fructus	MOL000737	morin	Vascular endothelial growth factor receptor 2 (VEGFR-2) (EC 2.7.10.1) (Fetal liver kinase 1) (FLK-1) (Kinase insert domain receptor) (KDR) (Protein-tyrosine kinase receptor flk-1) (CD antigen CD309)	KDR	P35968	3791
Mori Fructus	MOL000737	morin	Collagenase 3 (EC 3.4.24.-) (Matrix metalloproteinase-13) (MMP-13)	MMP13	P45452	4322
Mori Fructus	MOL000737	morin	Stromelysin-1 (SL-1) (EC 3.4.24.17) (Matrix metalloproteinase-3) (MMP-3) (Transin-1)	MMP3	P08254	4314
Mori Fructus	MOL000737	morin	Carbonic anhydrase 3 (EC 4.2.1.1) (Carbonate dehydratase III) (Carbonic anhydrase III) (CA-III)	CA3	P07451	761
Mori Fructus	MOL000737	morin	Serine/threonine-protein kinase PLK1 (EC 2.7.11.21) (Polo-like kinase 1) (PLK-1) (Serine/threonine-protein kinase 13) (STPK13)	PLK1	P53350	5347
Mori Fructus	MOL000737	morin	Carbonic anhydrase 6 (EC 4.2.1.1) (Carbonate dehydratase VI) (Carbonic anhydrase VI) (CA-VI) (Salivary carbonic anhydrase) (Secreted carbonic anhydrase)	CA6	P23280	765
Mori Fructus	MOL000737	morin	Cyclin-dependent kinase 1 (CDK1) (EC 2.7.11.22) (EC 2.7.11.23) (Cell division control protein 2 homolog) (Cell division protein kinase 1) (p34 protein kinase)	CDK1	P06493	983
Mori Fructus	MOL000737	morin	Matrix metalloproteinase-9 (MMP-9) (EC 3.4.24.35) (92 kDa gelatinase) (92 kDa type IV collagenase) (Gelatinase B) (GELB) [Cleaved into: 67 kDa matrix metalloproteinase-9; 82 kDa matrix metalloproteinase-9]	MMP9	P14780	4318
Mori Fructus	MOL000737	morin	72 kDa type IV collagenase (EC 3.4.24.24) (72 kDa gelatinase) (Gelatinase A) (Matrix metalloproteinase-2) (MMP-2) (TBE-1) [Cleaved into: PEX]	MMP2	P08253	4313
Mori Fructus	MOL000737	morin	Serine/threonine-protein kinase N1 (EC 2.7.11.13) (Protease-activated kinase 1) (PAK-1) (Protein kinase C-like 1) (Protein kinase C-like PKN) (Protein kinase PKN-alpha) (Protein-kinase C-related kinase 1) (Serine-threonine protein kinase N)	PKN1	Q16512	5585
Mori Fructus	MOL000737	morin	Carbonic anhydrase 14 (EC 4.2.1.1) (Carbonate dehydratase XIV) (Carbonic anhydrase XIV) (CA-XIV)	CA14	Q9ULX7	23632
Mori Fructus	MOL000737	morin	Carbonic anhydrase 9 (EC 4.2.1.1) (Carbonate dehydratase IX) (Carbonic anhydrase IX) (CA-IX) (CAIX) (Membrane antigen MN) (P54/58N) (Renal cell carcinoma-associated antigen G250) (RCC-associated antigen G250) (pMW1)	CA9	Q16790	768
Mori Fructus	MOL000737	morin	Casein kinase II subunit alpha (CK II alpha) (EC 2.7.11.1)	CSNK2A1	P68400	1457
Mori Fructus	MOL000737	morin	Polyunsaturated fatty acid lipoxygenase ALOX12 (EC 1.13.11.-) (Arachidonate (12S)-lipoxygenase) (12S-LOX) (12S-lipoxygenase) (EC 1.13.11.31) (Arachidonate (15S)-lipoxygenase) (EC 1.13.11.33) (Linoleate (13S)-lipoxygenase) (Lipoxin synthase 12-LO) (EC 3.3.2.-) (Platelet-type lipoxygenase 12)	ALOX12	P18054	239
Mori Fructus	MOL000737	morin	Hepatocyte growth factor receptor (HGF receptor) (EC 2.7.10.1) (HGF/SF receptor) (Proto-oncogene c-Met) (Scatter factor receptor) (SF receptor) (Tyrosine-protein kinase Met)	MET	P08581	4233
Mori Fructus	MOL000737	morin	Serine/threonine-protein kinase Nek2 (EC 2.7.11.1) (HSPK 21) (Never in mitosis A-related kinase 2) (NimA-related protein kinase 2) (NimA-like protein kinase 1)	NEK2	P51955	4751
Mori Fructus	MOL000737	morin	C-X-C chemokine receptor type 1 (CXC-R1) (CXCR-1) (CDw128a) (High affinity interleukin-8 receptor A) (IL-8R A) (IL-8 receptor type 1) (CD antigen CD181)	CXCR1	P25024	3577
Mori Fructus	MOL000737	morin	Calcium/calmodulin-dependent protein kinase type II subunit beta (CaM kinase II subunit beta) (CaMK-II subunit beta) (EC 2.7.11.17)	CAMK2B	Q13554	816
Mori Fructus	MOL000737	morin	ALK tyrosine kinase receptor (EC 2.7.10.1) (Anaplastic lymphoma kinase) (CD antigen CD246)	ALK	Q9UM73	238
Mori Fructus	MOL000737	morin	RAC-alpha serine/threonine-protein kinase (EC 2.7.11.1) (Protein kinase B) (PKB) (Protein kinase B alpha) (PKB alpha) (Proto-oncogene c-Akt) (RAC-PK-alpha)	AKT1	P31749	207
Mori Fructus	MOL000737	morin	Serine/threonine-protein kinase Nek6 (EC 2.7.11.1) (Never in mitosis A-related kinase 6) (NimA-related protein kinase 6) (Protein kinase SID6-1512)	NEK6	Q9HC98	10783
Mori Fructus	MOL000737	morin	Phospholipase A2 (EC 3.1.1.4) (Group IB phospholipase A2) (Phosphatidylcholine 2-acylhydrolase 1B)	PLA2G1B	P04054	5319
Mori Fructus	MOL000737	morin	Carbonic anhydrase 5A, mitochondrial (EC 4.2.1.1) (Carbonate dehydratase VA) (Carbonic anhydrase VA) (CA-VA)	CA5A	P35218	763
Mori Fructus	MOL000737	morin	Beta-secretase 1 (EC 3.4.23.46) (Aspartyl protease 2) (ASP2) (Asp 2) (Beta-site amyloid precursor protein cleaving enzyme 1) (Beta-site APP cleaving enzyme 1) (Memapsin-2) (Membrane-associated aspartic protease 2)	BACE1	P56817	23621
Mori Fructus	MOL000737	morin	Tyrosine-protein kinase receptor UFO (EC 2.7.10.1) (AXL oncogene)	AXL	P30530	558
Mori Fructus	MOL000737	morin	NUAK family SNF1-like kinase 1 (EC 2.7.11.1) (AMPK-related protein kinase 5) (ARK5) (Omphalocele kinase 1)	NUAK1	O60285	9891
Mori Fructus	MOL000737	morin	Aldo-keto reductase family 1 member C2 (EC 1.-.-.-) (3-alpha-HSD3) (Chlordecone reductase homolog HAKRD) (Dihydrodiol dehydrogenase 2) (DD-2) (DD2) (Dihydrodiol dehydrogenase/bile acid-binding protein) (DD/BABP) (Trans-1,2-dihydrobenzene-1,2-diol dehydrogenase) (EC 1.3.1.20) (Type III 3-alpha-hydroxysteroid dehydrogenase) (EC 1.1.1.357)	AKR1C2	P52895	1646
Mori Fructus	MOL000737	morin	Aldo-keto reductase family 1 member C1 (EC 1.1.1.-) (20-alpha-hydroxysteroid dehydrogenase) (20-alpha-HSD) (EC 1.1.1.149) (Chlordecone reductase homolog HAKRC) (Dihydrodiol dehydrogenase 1/2) (DD1/DD2) (High-affinity hepatic bile acid-binding protein) (HBAB) (Indanol dehydrogenase) (EC 1.1.1.112) (Trans-1,2-dihydrobenzene-1,2-diol dehydrogenase) (EC 1.3.1.20)	AKR1C1	Q04828	1645
Mori Fructus	MOL000737	morin	Aldo-keto reductase family 1 member C3 (EC 1.-.-.-) (17-beta-hydroxysteroid dehydrogenase type 5) (17-beta-HSD 5) (3-alpha-HSD type II, brain) (3-alpha-hydroxysteroid dehydrogenase type 2) (3-alpha-HSD type 2) (EC 1.1.1.357) (Chlordecone reductase homolog HAKRb) (Dihydrodiol dehydrogenase 3) (DD-3) (DD3) (Dihydrodiol dehydrogenase type I) (HA1753) (Indanol dehydrogenase) (EC 1.1.1.112) (Prostagla…	AKR1C3	P42330	8644
Mori Fructus	MOL000737	morin	Aldo-keto reductase family 1 member C4 (EC 1.1.1.-) (3-alpha-HSD1) (3-alpha-hydroxysteroid dehydrogenase type I) (EC 1.1.1.357) (Chlordecone reductase) (CDR) (EC 1.1.1.225) (Dihydrodiol dehydrogenase 4) (DD-4) (DD4) (HAKRA)	AKR1C4	P17516	1109
Mori Fructus	MOL000737	morin	Carbonic anhydrase 13 (EC 4.2.1.1) (Carbonate dehydratase XIII) (Carbonic anhydrase XIII) (CA-XIII)	CA13	Q8N1Q1	377677
Mori Fructus	MOL000737	morin	Aldo-keto reductase family 1 member A1 (EC 1.1.1.2) (EC 1.1.1.372) (EC 1.1.1.54) (Alcohol dehydrogenase [NADP(+)]) (Aldehyde reductase) (Glucuronate reductase) (EC 1.1.1.19) (Glucuronolactone reductase) (EC 1.1.1.20)	AKR1A1	P14550	10327
Mori Fructus	MOL000737	morin	Tyrosinase (EC 1.14.18.1) (LB24-AB) (Monophenol monooxygenase) (SK29-AB) (Tumor rejection antigen AB)	TYR	P14679	7299
Mori Fructus	MOL000737	morin	Estradiol 17-beta-dehydrogenase 1 (EC 1.1.1.62) (17-beta-hydroxysteroid dehydrogenase type 1) (17-beta-HSD 1) (20 alpha-hydroxysteroid dehydrogenase) (20-alpha-HSD) (E2DH) (Placental 17-beta-hydroxysteroid dehydrogenase) (Short chain dehydrogenase/reductase family 28C member 1)	HSD17B1	P14061	3292
Mori Fructus	MOL000737	morin	Aryl hydrocarbon receptor (Ah receptor) (AhR) (Class E basic helix-loop-helix protein 76) (bHLHe76)	AHR	P35869	196
Mori Fructus	MOL000737	morin	Steroid hormone receptor ERR1 (Estrogen receptor-like 1) (Estrogen-related receptor alpha) (ERR-alpha) (Nuclear receptor subfamily 3 group B member 1)	ESRRA	P11474	2101
Mori Fructus	MOL000737	morin	Acetylcholinesterase (AChE) (EC 3.1.1.7)	ACHE	P22303	43
Mori Fructus	MOL000737	morin	Tyrosine-protein kinase SYK (EC 2.7.10.2) (Spleen tyrosine kinase) (p72-Syk)	SYK	P43405	6850
Mori Fructus	MOL000737	morin	Microtubule-associated protein tau (Neurofibrillary tangle protein) (Paired helical filament-tau) (PHF-tau)	MAPT	P10636	4137
Mori Fructus	MOL000737	morin	Lysine-specific demethylase 4E (EC 1.14.11.66) (KDM4D-like protein) (Lysine-specific demethylase 4D-like) ([histone H3]-trimethyl-L-lysine(9) demethylase 4E)	KDM4E	B2RXH2	390245
Mori Fructus	MOL000737	morin	DNA topoisomerase 2-alpha (EC 5.6.2.2) (DNA topoisomerase II, alpha isozyme)	TOP2A	P11388	7153
Mori Fructus	MOL000737	morin	Insulin receptor (IR) (EC 2.7.10.1) (CD antigen CD220) [Cleaved into: Insulin receptor subunit alpha; Insulin receptor subunit beta]	INSR	P06213	3643
Mori Fructus	MOL000737	morin	Myosin light chain kinase, smooth muscle (MLCK) (smMLCK) (EC 2.7.11.18) (Kinase-related protein) (KRP) (Telokin) [Cleaved into: Myosin light chain kinase, smooth muscle, deglutamylated form]	MYLK	Q15746	4638
Mori Fructus	MOL000737	morin	Phosphatidylinositol 4,5-bisphosphate 3-kinase catalytic subunit gamma isoform (PI3-kinase subunit gamma) (PI3K-gamma) (PI3Kgamma) (PtdIns-3-kinase subunit gamma) (EC 2.7.1.153) (Phosphatidylinositol 4,5-bisphosphate 3-kinase 110 kDa catalytic subunit gamma) (PtdIns-3-kinase subunit p110-gamma) (p110gamma) (Phosphoinositide-3-kinase catalytic gamma polypeptide) (Serine/threonine protein kinase PI…	PIK3CG	P48736	5294
Mori Fructus	MOL000737	morin	DNA-(apurinic or apyrimidinic site) endonuclease (EC 3.1.-.-) (APEX nuclease) (APEN) (Apurinic-apyrimidinic endonuclease 1) (AP endonuclease 1) (APE-1) (REF-1) (Redox factor-1) [Cleaved into: DNA-(apurinic or apyrimidinic site) endonuclease, mitochondrial]	APEX1	P27695	328
Mori Fructus	MOL000737	morin	Cyclin-dependent kinase 5 activator 1 (CDK5 activator 1) (Cyclin-dependent kinase 5 regulatory subunit 1) (TPKII regulatory subunit) [Cleaved into: Cyclin-dependent kinase 5 activator 1, p35 (p35); Cyclin-dependent kinase 5 activator 1, p25 (p25) (Tau protein kinase II 23 kDa subunit) (p23)]	CDK5R1	Q15078	8851
Mori Fructus	MOL000737	morin	Cyclin-dependent-like kinase 5 (EC 2.7.11.1) (Cell division protein kinase 5) (Serine/threonine-protein kinase PSSALRE) (Tau protein kinase II catalytic subunit) (TPKII catalytic subunit)	CDK5	Q00535	1020
Mori Fructus	MOL000737	morin	G2/mitotic-specific cyclin-B3	CCNB3	Q8WWL7	85417
Mori Fructus	MOL000737	morin	Cyclin-dependent kinase 1 (CDK1) (EC 2.7.11.22) (EC 2.7.11.23) (Cell division control protein 2 homolog) (Cell division protein kinase 1) (p34 protein kinase)	CDK1	P06493	983
Mori Fructus	MOL000737	morin	G2/mitotic-specific cyclin-B1	CCNB1	P14635	891
Mori Fructus	MOL000737	morin	G2/mitotic-specific cyclin-B2	CCNB2	O95067	9133
Mori Fructus	MOL000737	morin	Arginase-1 (EC 3.5.3.1) (Liver-type arginase) (Type I arginase)	ARG1	P05089	383
Mori Fructus	MOL000737	morin	Transthyretin (ATTR) (Prealbumin) (TBPA)	TTR	P02766	7276
Mori Fructus	MOL000737	morin	Aldo-keto reductase family 1 member B10 (EC 1.1.1.300) (EC 1.1.1.54) (ARL-1) (Aldose reductase-like) (Aldose reductase-related protein) (ARP) (hARP) (Small intestine reductase) (SI reductase)	AKR1B10	O60218	57016
Mori Fructus	MOL000737	morin	Poly [ADP-ribose] polymerase tankyrase-2 (EC 2.4.2.30) (ADP-ribosyltransferase diphtheria toxin-like 6) (ARTD6) (Poly [ADP-ribose] polymerase 5B) (Protein poly-ADP-ribosyltransferase tankyrase-2) (EC 2.4.2.-) (TNKS-2) (TRF1-interacting ankyrin-related ADP-ribose polymerase 2) (Tankyrase II) (Tankyrase-2) (TANK2) (Tankyrase-like protein) (Tankyrase-related protein)	TNKS2	Q9H2K2	80351
Mori Fructus	MOL000737	morin	Poly [ADP-ribose] polymerase tankyrase-1 (EC 2.4.2.30) (ADP-ribosyltransferase diphtheria toxin-like 5) (ARTD5) (Poly [ADP-ribose] polymerase 5A) (Protein poly-ADP-ribosyltransferase tankyrase-1) (EC 2.4.2.-) (TNKS-1) (TRF1-interacting ankyrin-related ADP-ribose polymerase) (Tankyrase I) (Tankyrase-1) (TANK1)	TNKS	O95271	8658
Mori Fructus	MOL000737	morin	Cyclin-dependent kinase 6 (EC 2.7.11.22) (Cell division protein kinase 6) (Serine/threonine-protein kinase PLSTIRE)	CDK6	Q00534	1021
Mori Fructus	MOL000737	morin	Cyclin-dependent kinase 2 (EC 2.7.11.22) (Cell division protein kinase 2) (p33 protein kinase)	CDK2	P24941	1017
Mori Fructus	MOL000737	morin	Estrogen receptor (ER) (ER-alpha) (Estradiol receptor) (Nuclear receptor subfamily 3 group A member 1)	ESR1	P03372	2099
Mori Fructus	MOL000737	morin	Amyloid-beta precursor protein (APP) (ABPP) (APPI) (Alzheimer disease amyloid protein) (Amyloid precursor protein) (Amyloid-beta A4 protein) (Cerebral vascular amyloid peptide) (CVAP) (PreA4) (Protease nexin-II) (PN-II) [Cleaved into: N-APP; Soluble APP-alpha (S-APP-alpha); Soluble APP-beta (S-APP-beta); C99 (Beta-secretase C-terminal fragment) (Beta-CTF); Amyloid-beta protein 42 (Abeta42) (Beta-…	APP	P05067	351
Mori Fructus	MOL000737	morin	Poly [ADP-ribose] polymerase 1 (PARP-1) (EC 2.4.2.30) (ADP-ribosyltransferase diphtheria toxin-like 1) (ARTD1) (DNA ADP-ribosyltransferase PARP1) (EC 2.4.2.-) (NAD(+) ADP-ribosyltransferase 1) (ADPRT 1) (Poly[ADP-ribose] synthase 1) (Protein poly-ADP-ribosyltransferase PARP1) (EC 2.4.2.-)	PARP1	P09874	142
Mori Fructus	MOL000737	morin	Macrophage metalloelastase (MME) (EC 3.4.24.65) (Macrophage elastase) (ME) (hME) (Matrix metalloproteinase-12) (MMP-12)	MMP12	P39900	4321
Mori Fructus	MOL000737	morin	ADP-ribosyl cyclase/cyclic ADP-ribose hydrolase 1 (EC 3.2.2.6) (2'-phospho-ADP-ribosyl cyclase) (2'-phospho-ADP-ribosyl cyclase/2'-phospho-cyclic-ADP-ribose transferase) (EC 2.4.99.20) (2'-phospho-cyclic-ADP-ribose transferase) (ADP-ribosyl cyclase 1) (ADPRC 1) (Cyclic ADP-ribose hydrolase 1) (cADPr hydrolase 1) (T10) (CD antigen CD38)	CD38	P28907	952
Mori Fructus	MOL000737	morin	DNA topoisomerase 1 (EC 5.6.2.1) (DNA topoisomerase I)	TOP1	P11387	7150
Mori Fructus	MOL002372	(6Z,10E,14E,18E)-2,6,10,15,19,23-hexamethyltetracosa-2,6,10,14,18,22-hexaene	Cannabinoid receptor 2 (CB-2) (CB2) (hCB2) (CX5)	CNR2	P34972	1269
Mori Fructus	MOL002372	(6Z,10E,14E,18E)-2,6,10,15,19,23-hexamethyltetracosa-2,6,10,14,18,22-hexaene	Peroxisome proliferator-activated receptor alpha (PPAR-alpha) (Nuclear receptor subfamily 1 group C member 1)	PPARA	Q07869	5465
Mori Fructus	MOL002372	(6Z,10E,14E,18E)-2,6,10,15,19,23-hexamethyltetracosa-2,6,10,14,18,22-hexaene	Squalene monooxygenase (EC 1.14.14.17) (Squalene epoxidase) (SE)	SQLE	Q14534	6713
Mori Fructus	MOL002372	(6Z,10E,14E,18E)-2,6,10,15,19,23-hexamethyltetracosa-2,6,10,14,18,22-hexaene	Beta-secretase 1 (EC 3.4.23.46) (Aspartyl protease 2) (ASP2) (Asp 2) (Beta-site amyloid precursor protein cleaving enzyme 1) (Beta-site APP cleaving enzyme 1) (Memapsin-2) (Membrane-associated aspartic protease 2)	BACE1	P56817	23621
Mori Fructus	MOL002773	beta-carotene	Retinol-binding protein 4 (Plasma retinol-binding protein) (PRBP) (RBP) [Cleaved into: Plasma retinol-binding protein(1-182); Plasma retinol-binding protein(1-181); Plasma retinol-binding protein(1-179); Plasma retinol-binding protein(1-176)]	RBP4	P02753	5950
Mori Fructus	MOL010300	dIDP	Protein kinase C delta type (EC 2.7.11.13) (Tyrosine-protein kinase PRKCD) (EC 2.7.10.2) (nPKC-delta) [Cleaved into: Protein kinase C delta type regulatory subunit; Protein kinase C delta type catalytic subunit (Sphingosine-dependent protein kinase-1) (SDK1)]	PRKCD	Q05655	5580
Mori Fructus	MOL010300	dIDP	Protein kinase C alpha type (PKC-A) (PKC-alpha) (EC 2.7.11.13)	PRKCA	P17252	5578
Mori Fructus	MOL010300	dIDP	Tyrosine-protein phosphatase non-receptor type 1 (EC 3.1.3.48) (Protein-tyrosine phosphatase 1B) (PTP-1B)	PTPN1	P18031	5770
Mori Fructus	MOL010300	dIDP	Tyrosine-protein phosphatase non-receptor type 2 (EC 3.1.3.48) (T-cell protein-tyrosine phosphatase) (TCPTP)	PTPN2	P17706	5771
Mori Fructus	MOL010300	dIDP	Androgen receptor (Dihydrotestosterone receptor) (Nuclear receptor subfamily 3 group C member 4)	AR	P10275	367
Mori Fructus	MOL010300	dIDP	Potassium channel subfamily K member 2 (Outward rectifying potassium channel protein TREK-1) (TREK-1 K(+) channel subunit) (Two pore domain potassium channel TREK-1) (Two pore potassium channel TPKC1)	KCNK2	O95069	377

## Sheet: Table S4
Table S4. GO and KEGG pathway enrichment analyses of the CSMFCH component-target network
Category	GO	Description	LogP	Enrichment	Z-score	#TotalGeneInLibrary	#GeneInGO	#GeneInHitList	#GeneInGOAndHitList	%InGO	STDV %InGO	GeneID	Hits	Log(q-value)
GO Biological Processes	GO:0099537	trans-synaptic signaling	-41	7.7	21	24367	728	306	70	23	2.4	43|134|135|136|148|154|207|351|590|760|766|816|952|1020|1128|1129|1131|1132|1133|1135|1136|1137|1138|1139|1141|1142|1143|1268|1269|1759|1812|1813|1814|1815|1956|2030|2171|2741|2912|2913|2915|2916|2918|2932|3269|3350|3351|3352|3357|3358|3359|3717|4137|4311|5340|5743|5802|6530|6531|6532|6536|6572|6582|6714|7442|8973|9177|23621|27163|59340	ACHE|ADORA1|ADORA2A|ADORA2B|ADRA1A|ADRB2|AKT1|APP|BCHE|CA2|CA7|CAMK2B|CD38|CDK5|CHRM1|CHRM2|CHRM3|CHRM4|CHRM5|CHRNA2|CHRNA3|CHRNA4|CHRNA5|CHRNA7|CHRNB2|CHRNB3|CHRNB4|CNR1|CNR2|DNM1|DRD1|DRD2|DRD3|DRD4|EGFR|SLC29A1|FABP5|GLRA1|GRM2|GRM3|GRM5|GRM6|GRM8|GSK3B|HRH1|HTR1A|HTR1B|HTR1D|HTR2B|HTR2C|HTR3A|JAK2|MAPT|MME|PLG|PTGS2|PTPRS|SLC6A2|SLC6A3|SLC6A4|SLC6A9|SLC18A3|SLC22A2|SRC|TRPV1|CHRNA6|HTR3B|BACE…	-37
GO Biological Processes	GO:0099536	synaptic signaling	-41	7.6	20	24367	733	306	70	23	2.4	43|134|135|136|148|154|207|351|590|760|766|816|952|1020|1128|1129|1131|1132|1133|1135|1136|1137|1138|1139|1141|1142|1143|1268|1269|1759|1812|1813|1814|1815|1956|2030|2171|2741|2912|2913|2915|2916|2918|2932|3269|3350|3351|3352|3357|3358|3359|3717|4137|4311|5340|5743|5802|6530|6531|6532|6536|6572|6582|6714|7442|8973|9177|23621|27163|59340	ACHE|ADORA1|ADORA2A|ADORA2B|ADRA1A|ADRB2|AKT1|APP|BCHE|CA2|CA7|CAMK2B|CD38|CDK5|CHRM1|CHRM2|CHRM3|CHRM4|CHRM5|CHRNA2|CHRNA3|CHRNA4|CHRNA5|CHRNA7|CHRNB2|CHRNB3|CHRNB4|CNR1|CNR2|DNM1|DRD1|DRD2|DRD3|DRD4|EGFR|SLC29A1|FABP5|GLRA1|GRM2|GRM3|GRM5|GRM6|GRM8|GSK3B|HRH1|HTR1A|HTR1B|HTR1D|HTR2B|HTR2C|HTR3A|JAK2|MAPT|MME|PLG|PTGS2|PTPRS|SLC6A2|SLC6A3|SLC6A4|SLC6A9|SLC18A3|SLC22A2|SRC|TRPV1|CHRNA6|HTR3B|BACE…	-37
GO Biological Processes	GO:0098916	anterograde trans-synaptic signaling	-40	7.6	20	24367	720	306	69	23	2.4	43|134|135|136|148|154|207|351|590|760|766|816|952|1020|1128|1129|1131|1132|1133|1135|1136|1137|1138|1139|1141|1142|1143|1268|1269|1759|1812|1813|1814|1815|1956|2030|2741|2912|2913|2915|2916|2918|2932|3269|3350|3351|3352|3357|3358|3359|3717|4137|4311|5340|5743|5802|6530|6531|6532|6536|6572|6582|6714|7442|8973|9177|23621|27163|59340	ACHE|ADORA1|ADORA2A|ADORA2B|ADRA1A|ADRB2|AKT1|APP|BCHE|CA2|CA7|CAMK2B|CD38|CDK5|CHRM1|CHRM2|CHRM3|CHRM4|CHRM5|CHRNA2|CHRNA3|CHRNA4|CHRNA5|CHRNA7|CHRNB2|CHRNB3|CHRNB4|CNR1|CNR2|DNM1|DRD1|DRD2|DRD3|DRD4|EGFR|SLC29A1|GLRA1|GRM2|GRM3|GRM5|GRM6|GRM8|GSK3B|HRH1|HTR1A|HTR1B|HTR1D|HTR2B|HTR2C|HTR3A|JAK2|MAPT|MME|PLG|PTGS2|PTPRS|SLC6A2|SLC6A3|SLC6A4|SLC6A9|SLC18A3|SLC22A2|SRC|TRPV1|CHRNA6|HTR3B|BACE1|NAAA…	-36
GO Biological Processes	GO:0007268	chemical synaptic transmission	-40	7.6	20	24367	720	306	69	23	2.4	43|134|135|136|148|154|207|351|590|760|766|816|952|1020|1128|1129|1131|1132|1133|1135|1136|1137|1138|1139|1141|1142|1143|1268|1269|1759|1812|1813|1814|1815|1956|2030|2741|2912|2913|2915|2916|2918|2932|3269|3350|3351|3352|3357|3358|3359|3717|4137|4311|5340|5743|5802|6530|6531|6532|6536|6572|6582|6714|7442|8973|9177|23621|27163|59340	ACHE|ADORA1|ADORA2A|ADORA2B|ADRA1A|ADRB2|AKT1|APP|BCHE|CA2|CA7|CAMK2B|CD38|CDK5|CHRM1|CHRM2|CHRM3|CHRM4|CHRM5|CHRNA2|CHRNA3|CHRNA4|CHRNA5|CHRNA7|CHRNB2|CHRNB3|CHRNB4|CNR1|CNR2|DNM1|DRD1|DRD2|DRD3|DRD4|EGFR|SLC29A1|GLRA1|GRM2|GRM3|GRM5|GRM6|GRM8|GSK3B|HRH1|HTR1A|HTR1B|HTR1D|HTR2B|HTR2C|HTR3A|JAK2|MAPT|MME|PLG|PTGS2|PTPRS|SLC6A2|SLC6A3|SLC6A4|SLC6A9|SLC18A3|SLC22A2|SRC|TRPV1|CHRNA6|HTR3B|BACE1|NAAA…	-36
GO Biological Processes	GO:0032870	cellular response to hormone stimulus	-35	7.2	19	24367	712	306	64	21	2.3	142|207|328|367|383|554|760|1109|1128|1129|1131|1132|1133|1136|1137|1139|1141|1394|1508|1514|1645|1646|1956|2099|2100|2101|2322|2908|2932|3480|3643|3717|3718|4306|5241|5295|5319|5465|5467|5468|5580|5732|5734|5747|5770|5771|5972|6093|6095|6097|6714|6715|7357|7376|7421|8644|8851|8856|9475|9612|9970|10013|10062|59340	PARP1|AKT1|APEX1|AR|ARG1|AVPR2|CA2|AKR1C4|CHRM1|CHRM2|CHRM3|CHRM4|CHRM5|CHRNA3|CHRNA4|CHRNA7|CHRNB2|CRHR1|CTSB|CTSL|AKR1C1|AKR1C2|EGFR|ESR1|ESR2|ESRRA|FLT3|NR3C1|GSK3B|IGF1R|INSR|JAK2|JAK3|NR3C2|PGR|PIK3R1|PLA2G1B|PPARA|PPARD|PPARG|PRKCD|PTGER2|PTGER4|PTK2|PTPN1|PTPN2|REN|ROCK1|RORA|RORC|SRC|SRD5A1|UGCG|NR1H2|VDR|AKR1C3|CDK5R1|NR1I2|ROCK2|NCOR2|NR1I3|HDAC6|NR1H3|HRH4	-32
GO Biological Processes	GO:0010817	regulation of hormone levels	-35	8.5	20	24367	537	306	57	19	2.2	43|124|126|134|135|231|866|949|952|1080|1109|1136|1268|1394|1508|1513|1545|1565|1586|1588|1636|1645|1646|1717|1803|1813|1889|1956|2099|2864|3091|3156|3283|3290|3291|3292|3293|3294|3350|3358|3717|3741|4311|4843|5467|5578|5950|5972|6469|6715|6716|7276|7364|7421|8644|51478|57016	ACHE|ADH1A|ADH1C|ADORA1|ADORA2A|AKR1B1|SERPINA6|SCARB1|CD38|CFTR|AKR1C4|CHRNA3|CNR1|CRHR1|CTSB|CTSK|CYP1B1|CYP2D6|CYP17A1|CYP19A1|ACE|AKR1C1|AKR1C2|DHCR7|DPP4|DRD2|ECE1|EGFR|ESR1|FFAR1|HIF1A|HMGCR|HSD3B1|HSD11B1|HSD11B2|HSD17B1|HSD17B3|HSD17B2|HTR1A|HTR2C|JAK2|KCNA5|MME|NOS2|PPARD|PRKCA|RBP4|REN|SHH|SRD5A1|SRD5A2|TTR|UGT2B7|VDR|AKR1C3|HSD17B7|AKR1B10	-32
GO Biological Processes	GO:0009636	response to toxic substance	-34	8.4	19	24367	533	306	56	18	2.2	135|196|328|383|558|761|891|983|1135|1136|1137|1138|1139|1141|1142|1143|1268|1269|1545|1812|1813|1814|1815|2052|2053|2168|2539|2741|3066|3156|3351|3359|3558|3741|3791|4233|4353|5292|5423|5465|5580|5595|5742|5743|5950|6531|6532|6714|6715|8973|8989|9429|10013|10280|10327|57016	ADORA2A|AHR|APEX1|ARG1|AXL|CA3|CCNB1|CDK1|CHRNA2|CHRNA3|CHRNA4|CHRNA5|CHRNA7|CHRNB2|CHRNB3|CHRNB4|CNR1|CNR2|CYP1B1|DRD1|DRD2|DRD3|DRD4|EPHX1|EPHX2|FABP1|G6PD|GLRA1|HDAC2|HMGCR|HTR1B|HTR3A|IL2|KCNA5|KDR|MET|MPO|PIM1|POLB|PPARA|PRKCD|MAPK3|PTGS1|PTGS2|RBP4|SLC6A3|SLC6A4|SRC|SRD5A1|CHRNA6|TRPA1|ABCG2|HDAC6|SIGMAR1|AKR1A1|AKR1B10	-31
GO Biological Processes	GO:1901699	cellular response to nitrogen compound	-32	7.1	18	24367	660	306	59	19	2.3	142|154|196|207|231|328|351|383|760|1017|1020|1080|1128|1129|1131|1132|1133|1136|1137|1139|1141|1394|1812|1956|2101|2741|2915|2932|3066|3269|3351|3480|3643|3717|3718|4313|4314|4363|5294|5295|5319|5468|5580|5595|5724|5743|5747|5770|5771|6093|6532|6714|6715|7442|8851|9475|23621|50507|59340	PARP1|ADRB2|AHR|AKT1|AKR1B1|APEX1|APP|ARG1|CA2|CDK2|CDK5|CFTR|CHRM1|CHRM2|CHRM3|CHRM4|CHRM5|CHRNA3|CHRNA4|CHRNA7|CHRNB2|CRHR1|DRD1|EGFR|ESRRA|GLRA1|GRM5|GSK3B|HDAC2|HRH1|HTR1B|IGF1R|INSR|JAK2|JAK3|MMP2|MMP3|ABCC1|PIK3CG|PIK3R1|PLA2G1B|PPARG|PRKCD|MAPK3|PTAFR|PTGS2|PTK2|PTPN1|PTPN2|ROCK1|SLC6A4|SRC|SRD5A1|TRPV1|CDK5R1|ROCK2|BACE1|NOX4|HRH4	-29
GO Biological Processes	GO:0008202	steroid metabolic process	-32	11	20	24367	332	306	45	15	2	231|351|866|949|1080|1109|1545|1557|1565|1586|1588|1595|1645|1646|1717|2053|2099|2222|2539|2629|3156|3283|3290|3291|3292|3293|3294|5467|6095|6097|6319|6469|6646|6713|6715|6716|6721|7364|7421|8435|8644|8856|29881|51478|57704	AKR1B1|APP|SERPINA6|SCARB1|CFTR|AKR1C4|CYP1B1|CYP2C19|CYP2D6|CYP17A1|CYP19A1|CYP51A1|AKR1C1|AKR1C2|DHCR7|EPHX2|ESR1|FDFT1|G6PD|GBA|HMGCR|HSD3B1|HSD11B1|HSD11B2|HSD17B1|HSD17B3|HSD17B2|PPARD|RORA|RORC|SCD|SHH|SOAT1|SQLE|SRD5A1|SRD5A2|SREBF2|UGT2B7|VDR|SOAT2|AKR1C3|NR1I2|NPC1L1|HSD17B7|GBA2	-29
GO Biological Processes	GO:1901615	organic hydroxy compound metabolic process	-32	7.8	18	24367	548	306	54	18	2.2	124|126|231|239|246|351|949|1080|1109|1141|1508|1513|1545|1565|1588|1595|1645|1646|1717|1812|1813|1814|1815|2053|2222|2539|2629|3091|3156|3269|3293|3350|4128|5467|5724|5950|6319|6531|6646|6713|6715|6716|6721|7276|7299|7421|8435|8644|10327|27163|29881|51478|57016|57704	ADH1A|ADH1C|AKR1B1|ALOX12|ALOX15|APP|SCARB1|CFTR|AKR1C4|CHRNB2|CTSB|CTSK|CYP1B1|CYP2D6|CYP19A1|CYP51A1|AKR1C1|AKR1C2|DHCR7|DRD1|DRD2|DRD3|DRD4|EPHX2|FDFT1|G6PD|GBA|HIF1A|HMGCR|HRH1|HSD17B3|HTR1A|MAOA|PPARD|PTAFR|RBP4|SCD|SLC6A3|SOAT1|SQLE|SRD5A1|SRD5A2|SREBF2|TTR|TYR|VDR|SOAT2|AKR1C3|AKR1A1|NAAA|NPC1L1|HSD17B7|AKR1B10|GBA2	-28
GO Biological Processes	GO:0001505	regulation of neurotransmitter levels	-30	9.9	19	24367	355	306	44	14	2	43|135|136|148|207|590|1020|1129|1136|1137|1138|1141|1142|1143|1268|1545|1812|1813|1814|1815|2030|2932|3350|3351|3643|3690|3717|4128|4317|4843|5743|6095|6530|6531|6532|6536|6572|6582|6715|7442|8973|9475|23621|27163	ACHE|ADORA2A|ADORA2B|ADRA1A|AKT1|BCHE|CDK5|CHRM2|CHRNA3|CHRNA4|CHRNA5|CHRNB2|CHRNB3|CHRNB4|CNR1|CYP1B1|DRD1|DRD2|DRD3|DRD4|SLC29A1|GSK3B|HTR1A|HTR1B|INSR|ITGB3|JAK2|MAOA|MMP8|NOS2|PTGS2|RORA|SLC6A2|SLC6A3|SLC6A4|SLC6A9|SLC18A3|SLC22A2|SRD5A1|TRPV1|CHRNA6|ROCK2|BACE1|NAAA	-27
GO Biological Processes	GO:0042445	hormone metabolic process	-30	13	20	24367	241	306	38	12	1.9	43|124|126|231|866|949|1109|1508|1513|1545|1565|1586|1588|1636|1645|1646|1717|1889|2099|3091|3283|3290|3291|3292|3293|3294|4311|5950|5972|6469|6715|6716|7276|7364|7421|8644|51478|57016	ACHE|ADH1A|ADH1C|AKR1B1|SERPINA6|SCARB1|AKR1C4|CTSB|CTSK|CYP1B1|CYP2D6|CYP17A1|CYP19A1|ACE|AKR1C1|AKR1C2|DHCR7|ECE1|ESR1|HIF1A|HSD3B1|HSD11B1|HSD11B2|HSD17B1|HSD17B3|HSD17B2|MME|RBP4|REN|SHH|SRD5A1|SRD5A2|TTR|UGT2B7|VDR|AKR1C3|HSD17B7|AKR1B10	-27
GO Biological Processes	GO:0099177	regulation of trans-synaptic signaling	-30	8.5	18	24367	451	306	48	16	2.1	43|134|135|136|148|154|351|590|760|766|816|952|1020|1129|1136|1137|1138|1139|1141|1142|1143|1268|1269|1759|1812|1813|1814|1815|1956|2171|2912|2913|2915|2916|2918|2932|3269|3351|3717|4137|4311|5340|5743|5802|6532|6714|8973|23621	ACHE|ADORA1|ADORA2A|ADORA2B|ADRA1A|ADRB2|APP|BCHE|CA2|CA7|CAMK2B|CD38|CDK5|CHRM2|CHRNA3|CHRNA4|CHRNA5|CHRNA7|CHRNB2|CHRNB3|CHRNB4|CNR1|CNR2|DNM1|DRD1|DRD2|DRD3|DRD4|EGFR|FABP5|GRM2|GRM3|GRM5|GRM6|GRM8|GSK3B|HRH1|HTR1B|JAK2|MAPT|MME|PLG|PTGS2|PTPRS|SLC6A4|SRC|CHRNA6|BACE1	-26
GO Biological Processes	GO:0003013	circulatory system process	-29	7.5	17	24367	554	306	52	17	2.1	134|135|136|140|148|154|207|239|367|554|952|1129|1131|1268|1636|1812|1813|1814|1889|1956|2837|3156|3269|3291|3350|3351|3352|3357|3558|3717|3741|3757|4311|4843|5294|5465|5467|5468|5724|5732|5742|5743|5972|6051|6093|6331|6532|6714|7442|8654|9475|50507	ADORA1|ADORA2A|ADORA2B|ADORA3|ADRA1A|ADRB2|AKT1|ALOX12|AR|AVPR2|CD38|CHRM2|CHRM3|CNR1|ACE|DRD1|DRD2|DRD3|ECE1|EGFR|UTS2R|HMGCR|HRH1|HSD11B2|HTR1A|HTR1B|HTR1D|HTR2B|IL2|JAK2|KCNA5|KCNH2|MME|NOS2|PIK3CG|PPARA|PPARD|PPARG|PTAFR|PTGER2|PTGS1|PTGS2|REN|RNPEP|ROCK1|SCN5A|SLC6A4|SRC|TRPV1|PDE5A|ROCK2|NOX4	-26
GO Biological Processes	GO:0008015	blood circulation	-29	7.5	17	24367	544	306	51	17	2.1	134|135|136|140|148|154|207|239|367|554|952|1129|1131|1268|1636|1812|1813|1814|1889|1956|2837|3156|3269|3291|3350|3351|3352|3357|3558|3717|3741|3757|4311|4843|5294|5465|5467|5468|5724|5732|5742|5743|5972|6051|6093|6331|6532|6714|7442|8654|9475	ADORA1|ADORA2A|ADORA2B|ADORA3|ADRA1A|ADRB2|AKT1|ALOX12|AR|AVPR2|CD38|CHRM2|CHRM3|CNR1|ACE|DRD1|DRD2|DRD3|ECE1|EGFR|UTS2R|HMGCR|HRH1|HSD11B2|HTR1A|HTR1B|HTR1D|HTR2B|IL2|JAK2|KCNA5|KCNH2|MME|NOS2|PIK3CG|PPARA|PPARD|PPARG|PTAFR|PTGER2|PTGS1|PTGS2|REN|RNPEP|ROCK1|SCN5A|SLC6A4|SRC|TRPV1|PDE5A|ROCK2	-26
GO Biological Processes	GO:0050804	modulation of chemical synaptic transmission	-29	8.3	18	24367	450	306	47	15	2.1	43|134|135|136|148|154|351|590|760|766|816|952|1020|1129|1136|1137|1138|1139|1141|1142|1143|1268|1269|1759|1812|1813|1814|1815|1956|2912|2913|2915|2916|2918|2932|3269|3351|3717|4137|4311|5340|5743|5802|6532|6714|8973|23621	ACHE|ADORA1|ADORA2A|ADORA2B|ADRA1A|ADRB2|APP|BCHE|CA2|CA7|CAMK2B|CD38|CDK5|CHRM2|CHRNA3|CHRNA4|CHRNA5|CHRNA7|CHRNB2|CHRNB3|CHRNB4|CNR1|CNR2|DNM1|DRD1|DRD2|DRD3|DRD4|EGFR|GRM2|GRM3|GRM5|GRM6|GRM8|GSK3B|HRH1|HTR1B|JAK2|MAPT|MME|PLG|PTGS2|PTPRS|SLC6A4|SRC|CHRNA6|BACE1	-26
GO Biological Processes	GO:0044057	regulation of system process	-28	6.8	17	24367	617	306	53	17	2.2	134|135|136|140|142|148|154|207|351|554|816|952|1075|1129|1131|1136|1139|1143|1394|1636|1813|1814|1889|1956|2171|2539|2629|2741|2859|3269|3358|3558|3717|3741|3757|5294|5465|5578|5724|5731|5732|5743|5747|5972|6093|6331|6714|6869|7376|7442|8654|9475|10062	ADORA1|ADORA2A|ADORA2B|ADORA3|PARP1|ADRA1A|ADRB2|AKT1|APP|AVPR2|CAMK2B|CD38|CTSC|CHRM2|CHRM3|CHRNA3|CHRNA7|CHRNB4|CRHR1|ACE|DRD2|DRD3|ECE1|EGFR|FABP5|G6PD|GBA|GLRA1|GPR35|HRH1|HTR2C|IL2|JAK2|KCNA5|KCNH2|PIK3CG|PPARA|PRKCA|PTAFR|PTGER1|PTGER2|PTGS2|PTK2|REN|ROCK1|SCN5A|SRC|TACR1|NR1H2|TRPV1|PDE5A|ROCK2|NR1H3	-25
GO Biological Processes	GO:0035690	cellular response to drug	-27	8.9	17	24367	376	306	42	14	2	196|328|383|558|983|1017|1080|1128|1129|1131|1132|1133|1136|1137|1139|1141|1545|1812|1956|2168|2741|2908|3066|3351|3757|3791|4233|4314|4843|5580|5595|5724|5743|5972|6714|6715|7442|8851|9475|10013|10280|59340	AHR|APEX1|ARG1|AXL|CDK1|CDK2|CFTR|CHRM1|CHRM2|CHRM3|CHRM4|CHRM5|CHRNA3|CHRNA4|CHRNA7|CHRNB2|CYP1B1|DRD1|EGFR|FABP1|GLRA1|NR3C1|HDAC2|HTR1B|KCNH2|KDR|MET|MMP3|NOS2|PRKCD|MAPK3|PTAFR|PTGS2|REN|SRC|SRD5A1|TRPV1|CDK5R1|ROCK2|HDAC6|SIGMAR1|HRH4	-24
GO Biological Processes	GO:1903530	regulation of secretion by cell	-26	5.7	15	24367	777	306	56	18	2.2	43|134|135|136|148|952|1020|1080|1129|1136|1137|1138|1141|1142|1143|1268|1394|1588|1595|1803|1812|1813|1814|1815|1956|2864|2932|3091|3156|3350|3351|3357|3358|3558|3717|3741|3965|4317|4321|4843|5319|5467|5578|5595|5724|5734|5950|5972|6532|6714|6850|7376|8973|10062|23621|27159	ACHE|ADORA1|ADORA2A|ADORA2B|ADRA1A|CD38|CDK5|CFTR|CHRM2|CHRNA3|CHRNA4|CHRNA5|CHRNB2|CHRNB3|CHRNB4|CNR1|CRHR1|CYP19A1|CYP51A1|DPP4|DRD1|DRD2|DRD3|DRD4|EGFR|FFAR1|GSK3B|HIF1A|HMGCR|HTR1A|HTR1B|HTR2B|HTR2C|IL2|JAK2|KCNA5|LGALS9|MMP8|MMP12|NOS2|PLA2G1B|PPARD|PRKCA|MAPK3|PTAFR|PTGER4|RBP4|REN|SLC6A4|SRC|SYK|NR1H2|CHRNA6|NR1H3|BACE1|CHIA	-23
GO Biological Processes	GO:0008610	lipid biosynthetic process	-25	5.9	15	24367	715	306	53	17	2.2	43|207|231|239|240|246|949|1080|1109|1457|1565|1586|1588|1595|1717|2053|2170|2171|2222|2539|2629|3156|3283|3290|3291|3292|3293|3294|3357|3358|5294|5295|5319|5322|5467|5580|5742|5743|6319|6713|6715|6716|6721|6916|7357|7376|7421|8399|8644|9536|10062|29881|51478	ACHE|AKT1|AKR1B1|ALOX12|ALOX5|ALOX15|SCARB1|CFTR|AKR1C4|CSNK2A1|CYP2D6|CYP17A1|CYP19A1|CYP51A1|DHCR7|EPHX2|FABP3|FABP5|FDFT1|G6PD|GBA|HMGCR|HSD3B1|HSD11B1|HSD11B2|HSD17B1|HSD17B3|HSD17B2|HTR2B|HTR2C|PIK3CG|PIK3R1|PLA2G1B|PLA2G5|PPARD|PRKCD|PTGS1|PTGS2|SCD|SQLE|SRD5A1|SRD5A2|SREBF2|TBXAS1|UGCG|NR1H2|VDR|PLA2G10|AKR1C3|PTGES|NR1H3|NPC1L1|HSD17B7	-22
GO Biological Processes	GO:0050880	regulation of blood vessel size	-25	16	20	24367	141	306	28	9.2	1.6	134|135|136|148|154|207|239|554|952|1131|1636|1812|1889|1956|2837|3156|3269|3350|3351|3352|3357|3741|5467|5724|5743|6093|6532|9475	ADORA1|ADORA2A|ADORA2B|ADRA1A|ADRB2|AKT1|ALOX12|AVPR2|CD38|CHRM3|ACE|DRD1|ECE1|EGFR|UTS2R|HMGCR|HRH1|HTR1A|HTR1B|HTR1D|HTR2B|KCNA5|PPARD|PTAFR|PTGS2|ROCK1|SLC6A4|ROCK2	-22
GO Biological Processes	GO:0097746	regulation of blood vessel diameter	-25	16	20	24367	141	306	28	9.2	1.6	134|135|136|148|154|207|239|554|952|1131|1636|1812|1889|1956|2837|3156|3269|3350|3351|3352|3357|3741|5467|5724|5743|6093|6532|9475	ADORA1|ADORA2A|ADORA2B|ADRA1A|ADRB2|AKT1|ALOX12|AVPR2|CD38|CHRM3|ACE|DRD1|ECE1|EGFR|UTS2R|HMGCR|HRH1|HTR1A|HTR1B|HTR1D|HTR2B|KCNA5|PPARD|PTAFR|PTGS2|ROCK1|SLC6A4|ROCK2	-22
GO Biological Processes	GO:0035296	regulation of tube diameter	-25	16	20	24367	141	306	28	9.2	1.6	134|135|136|148|154|207|239|554|952|1131|1636|1812|1889|1956|2837|3156|3269|3350|3351|3352|3357|3741|5467|5724|5743|6093|6532|9475	ADORA1|ADORA2A|ADORA2B|ADRA1A|ADRB2|AKT1|ALOX12|AVPR2|CD38|CHRM3|ACE|DRD1|ECE1|EGFR|UTS2R|HMGCR|HRH1|HTR1A|HTR1B|HTR1D|HTR2B|KCNA5|PPARD|PTAFR|PTGS2|ROCK1|SLC6A4|ROCK2	-22
GO Biological Processes	GO:0035150	regulation of tube size	-25	16	20	24367	142	306	28	9.2	1.6	134|135|136|148|154|207|239|554|952|1131|1636|1812|1889|1956|2837|3156|3269|3350|3351|3352|3357|3741|5467|5724|5743|6093|6532|9475	ADORA1|ADORA2A|ADORA2B|ADRA1A|ADRB2|AKT1|ALOX12|AVPR2|CD38|CHRM3|ACE|DRD1|ECE1|EGFR|UTS2R|HMGCR|HRH1|HTR1A|HTR1B|HTR1D|HTR2B|KCNA5|PPARD|PTAFR|PTGS2|ROCK1|SLC6A4|ROCK2	-22
GO Biological Processes	GO:0015711	organic anion transport	-24	7.2	16	24367	487	306	44	14	2	134|135|207|383|759|760|761|762|763|765|766|768|771|949|1080|1109|1636|1645|1813|1814|1815|2167|2168|2170|2912|3351|4363|4843|5243|5319|5322|5465|5467|5468|5580|6536|6850|7442|8399|9429|23632|116085|377677|391013	ADORA1|ADORA2A|AKT1|ARG1|CA1|CA2|CA3|CA4|CA5A|CA6|CA7|CA9|CA12|SCARB1|CFTR|AKR1C4|ACE|AKR1C1|DRD2|DRD3|DRD4|FABP4|FABP1|FABP3|GRM2|HTR1B|ABCC1|NOS2|ABCB1|PLA2G1B|PLA2G5|PPARA|PPARD|PPARG|PRKCD|SLC6A9|SYK|TRPV1|PLA2G10|ABCG2|CA14|SLC22A12|CA13|PLA2G2C	-21
GO Biological Processes	GO:0071407	cellular response to organic cyclic compound	-24	6.7	15	24367	544	306	46	15	2	142|196|207|328|351|367|383|891|1080|1545|1812|1956|2099|2100|2101|2322|2908|3066|3269|3717|4306|5241|5292|5294|5465|5467|5468|5595|5724|5743|6095|6097|6532|6714|6715|7376|7421|7442|8644|8856|9475|9612|9970|10013|10062|50507	PARP1|AHR|AKT1|APEX1|APP|AR|ARG1|CCNB1|CFTR|CYP1B1|DRD1|EGFR|ESR1|ESR2|ESRRA|FLT3|NR3C1|HDAC2|HRH1|JAK2|NR3C2|PGR|PIM1|PIK3CG|PPARA|PPARD|PPARG|MAPK3|PTAFR|PTGS2|RORA|RORC|SLC6A4|SRC|SRD5A1|NR1H2|VDR|TRPV1|AKR1C3|NR1I2|ROCK2|NCOR2|NR1I3|HDAC6|NR1H3|NOX4	-21
GO Biological Processes	GO:0015850	organic hydroxy compound transport	-24	10	17	24367	264	306	34	11	1.8	135|949|1080|1109|1133|1137|1141|1268|1394|1588|1645|1812|1813|1814|1815|3350|3351|3690|5468|5950|5972|6469|6530|6531|6532|6646|6721|6850|7376|8399|8435|8973|10062|29881	ADORA2A|SCARB1|CFTR|AKR1C4|CHRM5|CHRNA4|CHRNB2|CNR1|CRHR1|CYP19A1|AKR1C1|DRD1|DRD2|DRD3|DRD4|HTR1A|HTR1B|ITGB3|PPARG|RBP4|REN|SHH|SLC6A2|SLC6A3|SLC6A4|SOAT1|SREBF2|SYK|NR1H2|PLA2G10|SOAT2|CHRNA6|NR1H3|NPC1L1	-21
GO Biological Processes	GO:0003018	vascular process in circulatory system	-24	13	18	24367	173	306	29	9.5	1.7	134|135|136|148|154|207|239|554|952|1131|1636|1812|1889|1956|2837|3156|3269|3350|3351|3352|3357|3741|5467|5724|5743|6093|6532|6714|9475	ADORA1|ADORA2A|ADORA2B|ADRA1A|ADRB2|AKT1|ALOX12|AVPR2|CD38|CHRM3|ACE|DRD1|ECE1|EGFR|UTS2R|HMGCR|HRH1|HTR1A|HTR1B|HTR1D|HTR2B|KCNA5|PPARD|PTAFR|PTGS2|ROCK1|SLC6A4|SRC|ROCK2	-21
GO Biological Processes	GO:0010876	lipid localization	-23	7.9	16	24367	405	306	40	13	1.9	207|949|1080|1109|1394|1588|1636|1645|1813|1814|1815|2167|2168|2170|3690|4363|4843|5243|5319|5322|5465|5467|5468|5580|5771|5950|5972|6469|6646|6713|6721|6850|7357|7376|8399|8435|10062|10280|29881|391013	AKT1|SCARB1|CFTR|AKR1C4|CRHR1|CYP19A1|ACE|AKR1C1|DRD2|DRD3|DRD4|FABP4|FABP1|FABP3|ITGB3|ABCC1|NOS2|ABCB1|PLA2G1B|PLA2G5|PPARA|PPARD|PPARG|PRKCD|PTPN2|RBP4|REN|SHH|SOAT1|SQLE|SREBF2|SYK|UGCG|NR1H2|PLA2G10|SOAT2|NR1H3|SIGMAR1|NPC1L1|PLA2G2C	-21
GO Biological Processes	GO:0034754	cellular hormone metabolic process	-23	16	19	24367	130	306	26	8.5	1.6	124|126|231|949|1109|1545|1565|1586|1588|1645|1646|1889|2099|3283|3292|3293|3294|5950|6469|6715|6716|7276|7364|8644|51478|57016	ADH1A|ADH1C|AKR1B1|SCARB1|AKR1C4|CYP1B1|CYP2D6|CYP17A1|CYP19A1|AKR1C1|AKR1C2|ECE1|ESR1|HSD3B1|HSD17B1|HSD17B3|HSD17B2|RBP4|SHH|SRD5A1|SRD5A2|TTR|UGT2B7|AKR1C3|HSD17B7|AKR1B10	-20
GO Biological Processes	GO:0006869	lipid transport	-23	8.3	16	24367	365	306	38	12	1.9	207|949|1080|1109|1394|1588|1636|1645|1813|1814|1815|2167|2168|2170|3690|4363|4843|5243|5319|5322|5465|5467|5468|5580|5950|5972|6469|6646|6721|6850|7357|7376|8399|8435|10062|10280|29881|391013	AKT1|SCARB1|CFTR|AKR1C4|CRHR1|CYP19A1|ACE|AKR1C1|DRD2|DRD3|DRD4|FABP4|FABP1|FABP3|ITGB3|ABCC1|NOS2|ABCB1|PLA2G1B|PLA2G5|PPARA|PPARD|PPARG|PRKCD|RBP4|REN|SHH|SOAT1|SREBF2|SYK|UGCG|NR1H2|PLA2G10|SOAT2|NR1H3|SIGMAR1|NPC1L1|PLA2G2C	-20
GO Biological Processes	GO:0042391	regulation of membrane potential	-23	7.4	15	24367	443	306	41	13	1.9	134|135|142|148|154|207|239|351|1020|1080|1128|1135|1136|1137|1138|1139|1141|1142|1143|1268|1269|1812|1813|1815|2030|2629|2741|2859|2915|2932|3359|3741|3757|3776|3791|4137|6331|6714|7442|8973|9177	ADORA1|ADORA2A|PARP1|ADRA1A|ADRB2|AKT1|ALOX12|APP|CDK5|CFTR|CHRM1|CHRNA2|CHRNA3|CHRNA4|CHRNA5|CHRNA7|CHRNB2|CHRNB3|CHRNB4|CNR1|CNR2|DRD1|DRD2|DRD4|SLC29A1|GBA|GLRA1|GPR35|GRM5|GSK3B|HTR3A|KCNA5|KCNH2|KCNK2|KDR|MAPT|SCN5A|SRC|TRPV1|CHRNA6|HTR3B	-20
GO Biological Processes	GO:0043269	regulation of ion transport	-23	5.7	14	24367	700	306	50	16	2.1	134|135|154|207|351|383|760|766|816|1020|1080|1128|1136|1137|1141|1268|1394|1612|1812|1813|1814|1815|2147|2170|2539|2859|2864|2915|2916|3350|3351|3359|3690|3741|3757|3958|4318|4638|5243|5294|5319|5580|5724|5743|5777|6331|6532|6850|8399|8973	ADORA1|ADORA2A|ADRB2|AKT1|APP|ARG1|CA2|CA7|CAMK2B|CDK5|CFTR|CHRM1|CHRNA3|CHRNA4|CHRNB2|CNR1|CRHR1|DAPK1|DRD1|DRD2|DRD3|DRD4|F2|FABP3|G6PD|GPR35|FFAR1|GRM5|GRM6|HTR1A|HTR1B|HTR3A|ITGB3|KCNA5|KCNH2|LGALS3|MMP9|MYLK|ABCB1|PIK3CG|PLA2G1B|PRKCD|PTAFR|PTGS2|PTPN6|SCN5A|SLC6A4|SYK|PLA2G10|CHRNA6	-20
GO Biological Processes	GO:0007187	G protein-coupled receptor signaling pathway, coupled to cyclic nucleotide second messenger	-23	10	17	24367	261	306	33	11	1.8	134|135|136|148|154|554|1128|1129|1131|1132|1133|1268|1269|1394|1812|1813|1814|1815|2912|2913|2916|2918|3269|3350|3351|3352|3357|3358|5578|5731|5732|5734|59340	ADORA1|ADORA2A|ADORA2B|ADRA1A|ADRB2|AVPR2|CHRM1|CHRM2|CHRM3|CHRM4|CHRM5|CNR1|CNR2|CRHR1|DRD1|DRD2|DRD3|DRD4|GRM2|GRM3|GRM6|GRM8|HRH1|HTR1A|HTR1B|HTR1D|HTR2B|HTR2C|PRKCA|PTGER1|PTGER2|PTGER4|HRH4	-20
GO Biological Processes	GO:0071417	cellular response to organonitrogen compound	-22	6.1	14	24367	597	306	46	15	2	142|154|196|207|231|328|351|383|760|1020|1080|1394|1812|1956|2101|2741|2915|2932|3066|3269|3351|3480|3643|3717|3718|4313|4363|5294|5295|5319|5468|5580|5595|5724|5743|5747|5770|5771|6093|6532|6714|6715|7442|9475|23621|50507	PARP1|ADRB2|AHR|AKT1|AKR1B1|APEX1|APP|ARG1|CA2|CDK5|CFTR|CRHR1|DRD1|EGFR|ESRRA|GLRA1|GRM5|GSK3B|HDAC2|HRH1|HTR1B|IGF1R|INSR|JAK2|JAK3|MMP2|ABCC1|PIK3CG|PIK3R1|PLA2G1B|PPARG|PRKCD|MAPK3|PTAFR|PTGS2|PTK2|PTPN1|PTPN2|ROCK1|SLC6A4|SRC|SRD5A1|TRPV1|ROCK2|BACE1|NOX4	-20
GO Biological Processes	GO:0097164	ammonium ion metabolic process	-22	11	17	24367	211	306	30	9.8	1.7	43|231|590|949|1109|1141|1457|1645|1646|1812|1813|1814|1815|2170|2171|2629|3350|4128|5319|5322|5580|6531|6715|8399|8644|10013|10327|57016|83933|196743	ACHE|AKR1B1|BCHE|SCARB1|AKR1C4|CHRNB2|CSNK2A1|AKR1C1|AKR1C2|DRD1|DRD2|DRD3|DRD4|FABP3|FABP5|GBA|HTR1A|MAOA|PLA2G1B|PLA2G5|PRKCD|SLC6A3|SRD5A1|PLA2G10|AKR1C3|HDAC6|AKR1A1|AKR1B10|HDAC10|PAOX	-20
GO Biological Processes	GO:0006820	anion transport	-22	5.9	14	24367	637	306	47	15	2.1	134|135|207|383|759|760|761|762|763|765|766|768|771|949|1080|1109|1636|1645|1813|1814|1815|2167|2168|2170|2741|2912|2915|3351|4363|4843|5243|5319|5322|5465|5467|5468|5580|5724|6536|6850|7442|8399|9429|23632|116085|377677|391013	ADORA1|ADORA2A|AKT1|ARG1|CA1|CA2|CA3|CA4|CA5A|CA6|CA7|CA9|CA12|SCARB1|CFTR|AKR1C4|ACE|AKR1C1|DRD2|DRD3|DRD4|FABP4|FABP1|FABP3|GLRA1|GRM2|GRM5|HTR1B|ABCC1|NOS2|ABCB1|PLA2G1B|PLA2G5|PPARA|PPARD|PPARG|PRKCD|PTAFR|SLC6A9|SYK|TRPV1|PLA2G10|ABCG2|CA14|SLC22A12|CA13|PLA2G2C	-19
GO Biological Processes	GO:0023061	signal release	-22	7	15	24367	467	306	41	13	1.9	134|135|136|148|952|1020|1080|1129|1136|1137|1138|1141|1142|1143|1268|1394|1588|1803|1812|1813|1956|2864|2932|3091|3156|3350|3351|3358|3717|3741|4843|5467|5578|5950|5972|6536|6572|6582|8973|23621|27163	ADORA1|ADORA2A|ADORA2B|ADRA1A|CD38|CDK5|CFTR|CHRM2|CHRNA3|CHRNA4|CHRNA5|CHRNB2|CHRNB3|CHRNB4|CNR1|CRHR1|CYP19A1|DPP4|DRD1|DRD2|EGFR|FFAR1|GSK3B|HIF1A|HMGCR|HTR1A|HTR1B|HTR2C|JAK2|KCNA5|NOS2|PPARD|PRKCA|RBP4|REN|SLC6A9|SLC18A3|SLC22A2|CHRNA6|BACE1|NAAA	-19
GO Biological Processes	GO:0071396	cellular response to lipid	-22	5.9	14	24367	616	306	46	15	2	142|196|207|239|367|383|558|891|949|1080|1234|1646|1956|2099|2100|2101|2322|2908|3066|3717|4306|4843|5241|5292|5465|5467|5468|5578|5595|5724|5732|5734|6095|6097|6532|6714|6715|7376|7421|8644|8856|9475|9612|9970|10013|10062	PARP1|AHR|AKT1|ALOX12|AR|ARG1|AXL|CCNB1|SCARB1|CFTR|CCR5|AKR1C2|EGFR|ESR1|ESR2|ESRRA|FLT3|NR3C1|HDAC2|JAK2|NR3C2|NOS2|PGR|PIM1|PPARA|PPARD|PPARG|PRKCA|MAPK3|PTAFR|PTGER2|PTGER4|RORA|RORC|SLC6A4|SRC|SRD5A1|NR1H2|VDR|AKR1C3|NR1I2|ROCK2|NCOR2|NR1I3|HDAC6|NR1H3	-19
GO Biological Processes	GO:0060359	response to ammonium ion	-22	15	18	24367	133	306	25	8.2	1.6	1020|1128|1129|1131|1132|1133|1136|1137|1139|1141|1268|1812|1813|1814|1815|3066|3269|3351|3359|5595|5724|6531|8851|9475|59340	CDK5|CHRM1|CHRM2|CHRM3|CHRM4|CHRM5|CHRNA3|CHRNA4|CHRNA7|CHRNB2|CNR1|DRD1|DRD2|DRD3|DRD4|HDAC2|HRH1|HTR1B|HTR3A|MAPK3|PTAFR|SLC6A3|CDK5R1|ROCK2|HRH4	-19
GO Biological Processes	GO:0006690	icosanoid metabolic process	-22	16	19	24367	119	306	24	7.8	1.5	239|240|246|1109|1545|1557|1565|1645|1646|2053|2166|2171|4363|5319|5322|5595|5742|5743|6850|6916|8399|8644|8824|9536	ALOX12|ALOX5|ALOX15|AKR1C4|CYP1B1|CYP2C19|CYP2D6|AKR1C1|AKR1C2|EPHX2|FAAH|FABP5|ABCC1|PLA2G1B|PLA2G5|MAPK3|PTGS1|PTGS2|SYK|TBXAS1|PLA2G10|AKR1C3|CES2|PTGES	-19
GO Biological Processes	GO:0048545	response to steroid hormone	-21	7.6	15	24367	386	306	37	12	1.9	142|367|383|590|760|952|1956|2099|2100|2101|2322|2629|2908|3283|3291|3351|3717|4306|5241|5465|5467|5468|5724|5732|5743|6095|6097|6714|6715|7376|7421|8644|8856|9612|9970|10013|10062	PARP1|AR|ARG1|BCHE|CA2|CD38|EGFR|ESR1|ESR2|ESRRA|FLT3|GBA|NR3C1|HSD3B1|HSD11B2|HTR1B|JAK2|NR3C2|PGR|PPARA|PPARD|PPARG|PTAFR|PTGER2|PTGS2|RORA|RORC|SRC|SRD5A1|NR1H2|VDR|AKR1C3|NR1I2|NCOR2|NR1I3|HDAC6|NR1H3	-19
GO Biological Processes	GO:0006836	neurotransmitter transport	-21	9.3	16	24367	273	306	32	10	1.7	135|136|148|1020|1129|1136|1137|1138|1141|1142|1143|1268|1812|1813|1814|1815|2030|2932|3350|3351|3358|3690|6530|6531|6532|6536|6572|6582|6850|8973|23621|27163	ADORA2A|ADORA2B|ADRA1A|CDK5|CHRM2|CHRNA3|CHRNA4|CHRNA5|CHRNB2|CHRNB3|CHRNB4|CNR1|DRD1|DRD2|DRD3|DRD4|SLC29A1|GSK3B|HTR1A|HTR1B|HTR2C|ITGB3|SLC6A2|SLC6A3|SLC6A4|SLC6A9|SLC18A3|SLC22A2|SYK|CHRNA6|BACE1|NAAA	-18
GO Biological Processes	GO:0019216	regulation of lipid metabolic process	-21	7.3	15	24367	417	306	38	12	1.9	134|207|949|1133|1268|1595|1717|1814|2053|2147|2168|2170|2171|2222|2322|3156|3357|3358|5294|5295|5465|5467|5468|5580|5743|5747|6095|6097|6319|6713|6714|6721|7376|7421|8644|8841|9612|10062	ADORA1|AKT1|SCARB1|CHRM5|CNR1|CYP51A1|DHCR7|DRD3|EPHX2|F2|FABP1|FABP3|FABP5|FDFT1|FLT3|HMGCR|HTR2B|HTR2C|PIK3CG|PIK3R1|PPARA|PPARD|PPARG|PRKCD|PTGS2|PTK2|RORA|RORC|SCD|SQLE|SRC|SREBF2|NR1H2|VDR|AKR1C3|HDAC3|NCOR2|NR1H3	-18
GO Biological Processes	GO:0048511	rhythmic process	-21	8.8	15	24367	299	306	33	11	1.8	134|135|196|558|983|1020|1141|1457|1813|1814|1815|1956|2099|2932|3066|4316|4843|5241|5465|5468|5601|6095|6097|6532|6714|6715|7150|7153|8841|8851|9475|9612|10062	ADORA1|ADORA2A|AHR|AXL|CDK1|CDK5|CHRNB2|CSNK2A1|DRD2|DRD3|DRD4|EGFR|ESR1|GSK3B|HDAC2|MMP7|NOS2|PGR|PPARA|PPARG|MAPK9|RORA|RORC|SLC6A4|SRC|SRD5A1|TOP1|TOP2A|HDAC3|CDK5R1|ROCK2|NCOR2|NR1H3	-18
GO Biological Processes	GO:1901652	response to peptide	-21	6.3	14	24367	534	306	42	14	2	142|154|207|231|328|351|383|760|1020|1139|1394|1759|2101|2170|2915|2932|3291|3480|3643|3717|3718|4313|4314|4318|4321|4322|4363|5295|5319|5465|5468|5580|5743|5747|5770|5771|6093|6714|6715|7442|9475|23621	PARP1|ADRB2|AKT1|AKR1B1|APEX1|APP|ARG1|CA2|CDK5|CHRNA7|CRHR1|DNM1|ESRRA|FABP3|GRM5|GSK3B|HSD11B2|IGF1R|INSR|JAK2|JAK3|MMP2|MMP3|MMP9|MMP12|MMP13|ABCC1|PIK3R1|PLA2G1B|PPARA|PPARG|PRKCD|PTGS2|PTK2|PTPN1|PTPN2|ROCK1|SRC|SRD5A1|TRPV1|ROCK2|BACE1	-18
GO Biological Processes	GO:0010035	response to inorganic substance	-21	6.1	14	24367	564	306	43	14	2	142|207|231|246|328|351|383|558|760|891|983|1017|1545|1813|1956|2167|2168|2539|2741|3066|3091|3741|3791|4137|4233|4314|4318|4353|5580|5595|5601|5743|6331|6469|6531|6714|7015|8644|8989|9536|10013|10280|23621	PARP1|AKT1|AKR1B1|ALOX15|APEX1|APP|ARG1|AXL|CA2|CCNB1|CDK1|CDK2|CYP1B1|DRD2|EGFR|FABP4|FABP1|G6PD|GLRA1|HDAC2|HIF1A|KCNA5|KDR|MAPT|MET|MMP3|MMP9|MPO|PRKCD|MAPK3|MAPK9|PTGS2|SCN5A|SHH|SLC6A3|SRC|TERT|AKR1C3|TRPA1|PTGES|HDAC6|SIGMAR1|BACE1	-18
GO Biological Processes	GO:0006066	alcohol metabolic process	-21	7.7	15	24367	374	306	36	12	1.8	124|126|231|351|949|1080|1109|1545|1565|1595|1645|1646|1717|2053|2222|2539|2629|3156|3269|5467|5724|5950|6319|6646|6713|6721|7276|7421|8435|8644|10327|27163|29881|51478|57016|57704	ADH1A|ADH1C|AKR1B1|APP|SCARB1|CFTR|AKR1C4|CYP1B1|CYP2D6|CYP51A1|AKR1C1|AKR1C2|DHCR7|EPHX2|FDFT1|G6PD|GBA|HMGCR|HRH1|PPARD|PTAFR|RBP4|SCD|SOAT1|SQLE|SREBF2|TTR|VDR|SOAT2|AKR1C3|AKR1A1|NAAA|NPC1L1|HSD17B7|AKR1B10|GBA2	-18
GO Biological Processes	GO:0006979	response to oxidative stress	-20	6.8	14	24367	458	306	39	13	1.9	142|207|328|351|383|558|761|952|983|1017|1137|1545|1612|1956|2168|2539|2629|3066|3091|3717|3741|4137|4170|4233|4313|4314|4318|4353|5580|5595|5601|5742|5743|6714|8644|8989|10013|10280|50507	PARP1|AKT1|APEX1|APP|ARG1|AXL|CA3|CD38|CDK1|CDK2|CHRNA4|CYP1B1|DAPK1|EGFR|FABP1|G6PD|GBA|HDAC2|HIF1A|JAK2|KCNA5|MAPT|MCL1|MET|MMP2|MMP3|MMP9|MPO|PRKCD|MAPK3|MAPK9|PTGS1|PTGS2|SRC|AKR1C3|TRPA1|HDAC6|SIGMAR1|NOX4	-18
GO Biological Processes	GO:0046677	response to antibiotic	-20	8.2	15	24367	331	306	34	11	1.8	196|328|383|558|761|983|1080|1141|1268|1545|1813|1814|1815|2168|2539|2741|3066|3156|3351|3359|3558|3716|3717|3741|4233|5423|5580|5950|6531|6714|6715|8989|10013|10280	AHR|APEX1|ARG1|AXL|CA3|CDK1|CFTR|CHRNB2|CNR1|CYP1B1|DRD2|DRD3|DRD4|FABP1|G6PD|GLRA1|HDAC2|HMGCR|HTR1B|HTR3A|IL2|JAK1|JAK2|KCNA5|MET|POLB|PRKCD|RBP4|SLC6A3|SRC|SRD5A1|TRPA1|HDAC6|SIGMAR1	-18
GO Biological Processes	GO:0009410	response to xenobiotic stimulus	-20	8.8	15	24367	288	306	32	10	1.7	135|196|383|590|1020|1141|1268|1269|1545|1557|1565|1645|1812|1813|1814|1815|1956|2052|2629|2908|3066|3351|3359|5468|5724|5742|6095|6097|6531|6715|8824|8856	ADORA2A|AHR|ARG1|BCHE|CDK5|CHRNB2|CNR1|CNR2|CYP1B1|CYP2C19|CYP2D6|AKR1C1|DRD1|DRD2|DRD3|DRD4|EGFR|EPHX1|GBA|NR3C1|HDAC2|HTR1B|HTR3A|PPARG|PTAFR|PTGS1|RORA|RORC|SLC6A3|SRD5A1|CES2|NR1I2	-18
GO Biological Processes	GO:0007188	adenylate cyclase-modulating G protein-coupled receptor signaling pathway	-20	10	16	24367	227	306	29	9.5	1.7	134|135|136|148|154|554|1128|1129|1131|1132|1133|1268|1394|1812|1813|1814|1815|2912|2913|2916|2918|3350|3351|3352|5578|5731|5732|5734|59340	ADORA1|ADORA2A|ADORA2B|ADRA1A|ADRB2|AVPR2|CHRM1|CHRM2|CHRM3|CHRM4|CHRM5|CNR1|CRHR1|DRD1|DRD2|DRD3|DRD4|GRM2|GRM3|GRM6|GRM8|HTR1A|HTR1B|HTR1D|PRKCA|PTGER1|PTGER2|PTGER4|HRH4	-18
GO Biological Processes	GO:0007610	behavior	-20	5.7	13	24367	617	306	44	14	2	134|135|148|154|238|351|590|1020|1136|1137|1138|1139|1141|1143|1268|1803|1812|1813|1814|1815|1956|2741|2915|2916|3066|3091|3156|3269|3350|3351|3352|3357|3358|3643|3776|4137|4311|5465|5743|5972|6531|6532|6715|7442	ADORA1|ADORA2A|ADRA1A|ADRB2|ALK|APP|BCHE|CDK5|CHRNA3|CHRNA4|CHRNA5|CHRNA7|CHRNB2|CHRNB4|CNR1|DPP4|DRD1|DRD2|DRD3|DRD4|EGFR|GLRA1|GRM5|GRM6|HDAC2|HIF1A|HMGCR|HRH1|HTR1A|HTR1B|HTR1D|HTR2B|HTR2C|INSR|KCNK2|MAPT|MME|PPARA|PTGS2|REN|SLC6A3|SLC6A4|SRD5A1|TRPV1	-18
GO Biological Processes	GO:0090087	regulation of peptide transport	-20	5.1	13	24367	755	306	48	16	2.1	43|134|135|760|952|983|1020|1080|1128|1268|1595|1803|1813|1814|1815|1956|2864|2932|3091|3156|3357|3358|3558|3717|3741|3965|4317|4321|4843|5295|5319|5467|5578|5580|5595|5734|5743|5770|5950|6469|6714|6721|6850|7376|8841|8851|10062|27159	ACHE|ADORA1|ADORA2A|CA2|CD38|CDK1|CDK5|CFTR|CHRM1|CNR1|CYP51A1|DPP4|DRD2|DRD3|DRD4|EGFR|FFAR1|GSK3B|HIF1A|HMGCR|HTR2B|HTR2C|IL2|JAK2|KCNA5|LGALS9|MMP8|MMP12|NOS2|PIK3R1|PLA2G1B|PPARD|PRKCA|PRKCD|MAPK3|PTGER4|PTGS2|PTPN1|RBP4|SHH|SRC|SREBF2|SYK|NR1H2|HDAC3|CDK5R1|NR1H3|CHIA	-17
GO Biological Processes	GO:0051588	regulation of neurotransmitter transport	-19	13	17	24367	145	306	24	7.8	1.5	135|136|148|1020|1129|1136|1137|1138|1141|1142|1143|1268|1812|1813|1814|1815|2932|3350|3351|3358|3690|6532|8973|23621	ADORA2A|ADORA2B|ADRA1A|CDK5|CHRM2|CHRNA3|CHRNA4|CHRNA5|CHRNB2|CHRNB3|CHRNB4|CNR1|DRD1|DRD2|DRD3|DRD4|GSK3B|HTR1A|HTR1B|HTR2C|ITGB3|SLC6A4|CHRNA6|BACE1	-17
GO Biological Processes	GO:0070201	regulation of establishment of protein localization	-19	5	13	24367	772	306	48	16	2.1	43|135|952|983|1020|1080|1128|1268|1509|1595|1803|1813|1814|1815|1956|2864|2932|3091|3156|3357|3558|3717|3741|3965|4137|4317|4321|4843|5295|5319|5467|5578|5580|5595|5734|5743|5770|5950|6469|6714|6721|6850|7376|8841|8851|10013|10062|27159	ACHE|ADORA2A|CD38|CDK1|CDK5|CFTR|CHRM1|CNR1|CTSD|CYP51A1|DPP4|DRD2|DRD3|DRD4|EGFR|FFAR1|GSK3B|HIF1A|HMGCR|HTR2B|IL2|JAK2|KCNA5|LGALS9|MAPT|MMP8|MMP12|NOS2|PIK3R1|PLA2G1B|PPARD|PRKCA|PRKCD|MAPK3|PTGER4|PTGS2|PTPN1|RBP4|SHH|SRC|SREBF2|SYK|NR1H2|HDAC3|CDK5R1|HDAC6|NR1H3|CHIA	-17
GO Biological Processes	GO:0062012	regulation of small molecule metabolic process	-19	6.5	13	24367	469	306	38	12	1.9	136|142|207|351|891|983|1268|1595|1717|2053|2168|2170|2171|2222|2932|3091|3156|3269|3643|4843|5209|5465|5467|5468|5724|5743|5771|6095|6097|6319|6713|6714|6721|7376|7421|8644|9612|10062	ADORA2B|PARP1|AKT1|APP|CCNB1|CDK1|CNR1|CYP51A1|DHCR7|EPHX2|FABP1|FABP3|FABP5|FDFT1|GSK3B|HIF1A|HMGCR|HRH1|INSR|NOS2|PFKFB3|PPARA|PPARD|PPARG|PTAFR|PTGS2|PTPN2|RORA|RORC|SCD|SQLE|SRC|SREBF2|NR1H2|VDR|AKR1C3|NCOR2|NR1H3	-17
GO Biological Processes	GO:0051347	positive regulation of transferase activity	-19	5.2	13	24367	692	306	45	15	2	134|136|148|154|207|238|558|891|983|994|1020|1136|1139|1636|1813|1815|1956|2147|2322|2915|3357|3480|3558|3643|3690|3717|3791|4137|4233|4751|5294|5319|5347|5580|5585|5595|5747|5770|6714|6850|8654|8658|8851|9212|50507	ADORA1|ADORA2B|ADRA1A|ADRB2|AKT1|ALK|AXL|CCNB1|CDK1|CDC25B|CDK5|CHRNA3|CHRNA7|ACE|DRD2|DRD4|EGFR|F2|FLT3|GRM5|HTR2B|IGF1R|IL2|INSR|ITGB3|JAK2|KDR|MAPT|MET|NEK2|PIK3CG|PLA2G1B|PLK1|PRKCD|PKN1|MAPK3|PTK2|PTPN1|SRC|SYK|PDE5A|TNKS|CDK5R1|AURKB|NOX4	-16
GO Biological Processes	GO:0050878	regulation of body fluid levels	-19	6.1	13	24367	507	306	39	13	1.9	134|135|231|239|554|558|1080|1128|1131|1813|2030|2147|2629|3066|3091|3291|3674|3690|3717|4233|5294|5295|5340|5578|5580|5595|5777|6469|6531|6582|6714|6850|7357|7376|7421|7498|9612|10062|23173	ADORA1|ADORA2A|AKR1B1|ALOX12|AVPR2|AXL|CFTR|CHRM1|CHRM3|DRD2|SLC29A1|F2|GBA|HDAC2|HIF1A|HSD11B2|ITGA2B|ITGB3|JAK2|MET|PIK3CG|PIK3R1|PLG|PRKCA|PRKCD|MAPK3|PTPN6|SHH|SLC6A3|SLC22A2|SRC|SYK|UGCG|NR1H2|VDR|XDH|NCOR2|NR1H3|METAP1	-16
GO Biological Processes	GO:1901568	fatty acid derivative metabolic process	-19	12	16	24367	172	306	25	8.2	1.6	239|240|246|1109|1545|1557|1565|1645|1646|2053|2166|2171|4363|5319|5322|5595|5742|5743|6319|6850|6916|8399|8644|8824|9536	ALOX12|ALOX5|ALOX15|AKR1C4|CYP1B1|CYP2C19|CYP2D6|AKR1C1|AKR1C2|EPHX2|FAAH|FABP5|ABCC1|PLA2G1B|PLA2G5|MAPK3|PTGS1|PTGS2|SCD|SYK|TBXAS1|PLA2G10|AKR1C3|CES2|PTGES	-16
GO Biological Processes	GO:0097305	response to alcohol	-18	9.3	15	24367	239	306	28	9.2	1.6	142|196|207|761|983|1080|1141|1234|1268|1646|1813|1814|1815|2539|2741|3066|3156|3283|3351|3359|3558|5423|5468|5732|5734|5950|6531|8644	PARP1|AHR|AKT1|CA3|CDK1|CFTR|CHRNB2|CCR5|CNR1|AKR1C2|DRD2|DRD3|DRD4|G6PD|GLRA1|HDAC2|HMGCR|HSD3B1|HTR1B|HTR3A|IL2|POLB|PPARG|PTGER2|PTGER4|RBP4|SLC6A3|AKR1C3	-16
GO Biological Processes	GO:0007210	serotonin receptor signaling pathway	-18	31	21	24367	39	306	15	4.9	1.2	1128|1129|1131|1132|1133|1815|3269|3350|3351|3352|3357|3358|3359|9177|59340	CHRM1|CHRM2|CHRM3|CHRM4|CHRM5|DRD4|HRH1|HTR1A|HTR1B|HTR1D|HTR2B|HTR2C|HTR3A|HTR3B|HRH4	-16
GO Biological Processes	GO:0034599	cellular response to oxidative stress	-18	8	14	24367	309	306	31	10	1.7	142|207|328|383|558|983|1017|1545|1612|1956|2168|2539|2629|3066|3091|3717|4137|4170|4233|4313|4314|4318|4353|5580|5595|5601|6714|8644|10013|10280|50507	PARP1|AKT1|APEX1|ARG1|AXL|CDK1|CDK2|CYP1B1|DAPK1|EGFR|FABP1|G6PD|GBA|HDAC2|HIF1A|JAK2|MAPT|MCL1|MET|MMP2|MMP3|MMP9|MPO|PRKCD|MAPK3|MAPK9|SRC|AKR1C3|HDAC6|SIGMAR1|NOX4	-16
GO Biological Processes	GO:0099565	chemical synaptic transmission, postsynaptic	-18	15	17	24367	112	306	21	6.9	1.4	134|135|154|207|351|1020|1135|1136|1137|1138|1139|1141|1142|1143|1813|1815|2030|2741|2932|7442|8973	ADORA1|ADORA2A|ADRB2|AKT1|APP|CDK5|CHRNA2|CHRNA3|CHRNA4|CHRNA5|CHRNA7|CHRNB2|CHRNB3|CHRNB4|DRD2|DRD4|SLC29A1|GLRA1|GSK3B|TRPV1|CHRNA6	-16
GO Biological Processes	GO:0006939	smooth muscle contraction	-18	15	17	24367	112	306	21	6.9	1.4	134|136|148|154|952|1129|1131|1136|1141|1143|1812|1813|3352|3357|4638|5724|5743|6093|6869|7442|9475	ADORA1|ADORA2B|ADRA1A|ADRB2|CD38|CHRM2|CHRM3|CHRNA3|CHRNB2|CHRNB4|DRD1|DRD2|HTR1D|HTR2B|MYLK|PTAFR|PTGS2|ROCK1|TACR1|TRPV1|ROCK2	-16
GO Biological Processes	GO:0006694	steroid biosynthetic process	-18	10	15	24367	202	306	26	8.5	1.6	231|949|1080|1109|1586|1588|1595|1717|2222|2539|3156|3283|3290|3291|3292|3293|3294|6319|6713|6715|6716|6721|7421|8644|29881|51478	AKR1B1|SCARB1|CFTR|AKR1C4|CYP17A1|CYP19A1|CYP51A1|DHCR7|FDFT1|G6PD|HMGCR|HSD3B1|HSD11B1|HSD11B2|HSD17B1|HSD17B3|HSD17B2|SCD|SQLE|SRD5A1|SRD5A2|SREBF2|VDR|AKR1C3|NPC1L1|HSD17B7	-16
GO Biological Processes	GO:0051223	regulation of protein transport	-18	4.9	12	24367	725	306	45	15	2	43|135|952|983|1020|1080|1128|1268|1595|1803|1813|1814|1815|1956|2864|2932|3091|3156|3357|3558|3717|3741|3965|4317|4321|4843|5295|5319|5467|5578|5580|5595|5734|5743|5770|5950|6469|6714|6721|6850|7376|8841|8851|10062|27159	ACHE|ADORA2A|CD38|CDK1|CDK5|CFTR|CHRM1|CNR1|CYP51A1|DPP4|DRD2|DRD3|DRD4|EGFR|FFAR1|GSK3B|HIF1A|HMGCR|HTR2B|IL2|JAK2|KCNA5|LGALS9|MMP8|MMP12|NOS2|PIK3R1|PLA2G1B|PPARD|PRKCA|PRKCD|MAPK3|PTGER4|PTGS2|PTPN1|RBP4|SHH|SRC|SREBF2|SYK|NR1H2|HDAC3|CDK5R1|NR1H3|CHIA	-16
GO Biological Processes	GO:0098771	inorganic ion homeostasis	-18	4.8	12	24367	759	306	46	15	2	134|135|148|351|554|760|766|771|952|1020|1080|1139|1234|1268|1812|1813|1814|1815|1956|2099|2147|2859|2864|2915|3091|3351|3357|3358|3558|3577|3717|3741|3757|5294|5319|5595|5731|5732|5734|5777|6869|7421|7442|8989|9429|59340	ADORA1|ADORA2A|ADRA1A|APP|AVPR2|CA2|CA7|CA12|CD38|CDK5|CFTR|CHRNA7|CCR5|CNR1|DRD1|DRD2|DRD3|DRD4|EGFR|ESR1|F2|GPR35|FFAR1|GRM5|HIF1A|HTR1B|HTR2B|HTR2C|IL2|CXCR1|JAK2|KCNA5|KCNH2|PIK3CG|PLA2G1B|MAPK3|PTGER1|PTGER2|PTGER4|PTPN6|TACR1|VDR|TRPV1|TRPA1|ABCG2|HRH4	-16
GO Biological Processes	GO:0097756	negative regulation of blood vessel diameter	-18	18	17	24367	85	306	19	6.2	1.4	134|148|207|554|952|1131|1636|1889|1956|3156|3269|3350|3351|3352|3357|3741|5724|5743|6532	ADORA1|ADRA1A|AKT1|AVPR2|CD38|CHRM3|ACE|ECE1|EGFR|HMGCR|HRH1|HTR1A|HTR1B|HTR1D|HTR2B|KCNA5|PTAFR|PTGS2|SLC6A4	-16
GO Biological Processes	GO:0060078	regulation of postsynaptic membrane potential	-18	12	16	24367	147	306	23	7.5	1.5	134|135|154|207|351|1020|1128|1135|1136|1137|1138|1139|1141|1142|1143|1813|1815|2030|2741|2915|2932|7442|8973	ADORA1|ADORA2A|ADRB2|AKT1|APP|CDK5|CHRM1|CHRNA2|CHRNA3|CHRNA4|CHRNA5|CHRNA7|CHRNB2|CHRNB3|CHRNB4|DRD2|DRD4|SLC29A1|GLRA1|GRM5|GSK3B|TRPV1|CHRNA6	-16
GO Biological Processes	GO:0033559	unsaturated fatty acid metabolic process	-18	15	16	24367	115	306	21	6.9	1.4	239|240|246|1109|1545|1557|1565|1645|1646|2053|2166|2171|5595|5742|5743|6319|6916|8399|8644|8824|9536	ALOX12|ALOX5|ALOX15|AKR1C4|CYP1B1|CYP2C19|CYP2D6|AKR1C1|AKR1C2|EPHX2|FAAH|FABP5|MAPK3|PTGS1|PTGS2|SCD|TBXAS1|PLA2G10|AKR1C3|CES2|PTGES	-16
GO Biological Processes	GO:0060079	excitatory postsynaptic potential	-18	15	17	24367	103	306	20	6.5	1.4	134|135|154|207|351|1020|1135|1136|1137|1138|1139|1141|1142|1143|1813|2030|2741|2932|7442|8973	ADORA1|ADORA2A|ADRB2|AKT1|APP|CDK5|CHRNA2|CHRNA3|CHRNA4|CHRNA5|CHRNA7|CHRNB2|CHRNB3|CHRNB4|DRD2|SLC29A1|GLRA1|GSK3B|TRPV1|CHRNA6	-15
GO Biological Processes	GO:0033674	positive regulation of kinase activity	-18	5.3	12	24367	613	306	41	13	1.9	134|136|148|154|207|238|558|891|983|994|1020|1136|1139|1636|1813|1815|1956|2147|2322|2915|3357|3480|3558|3643|3690|3717|3791|4137|4233|5294|5319|5580|5585|5595|5747|5770|6714|6850|8654|8851|50507	ADORA1|ADORA2B|ADRA1A|ADRB2|AKT1|ALK|AXL|CCNB1|CDK1|CDC25B|CDK5|CHRNA3|CHRNA7|ACE|DRD2|DRD4|EGFR|F2|FLT3|GRM5|HTR2B|IGF1R|IL2|INSR|ITGB3|JAK2|KDR|MAPT|MET|PIK3CG|PLA2G1B|PRKCD|PKN1|MAPK3|PTK2|PTPN1|SRC|SYK|PDE5A|CDK5R1|NOX4	-15
GO Biological Processes	GO:0055080	cation homeostasis	-18	4.8	12	24367	748	306	45	15	2	134|135|148|351|554|760|766|952|1020|1080|1139|1234|1268|1812|1813|1814|1815|1956|2099|2147|2859|2864|2915|3091|3351|3357|3358|3558|3577|3717|3741|3757|5294|5319|5595|5731|5732|5734|5777|6869|7421|7442|8989|9429|59340	ADORA1|ADORA2A|ADRA1A|APP|AVPR2|CA2|CA7|CD38|CDK5|CFTR|CHRNA7|CCR5|CNR1|DRD1|DRD2|DRD3|DRD4|EGFR|ESR1|F2|GPR35|FFAR1|GRM5|HIF1A|HTR1B|HTR2B|HTR2C|IL2|CXCR1|JAK2|KCNA5|KCNH2|PIK3CG|PLA2G1B|MAPK3|PTGER1|PTGER2|PTGER4|PTPN6|TACR1|VDR|TRPV1|TRPA1|ABCG2|HRH4	-15
GO Biological Processes	GO:0032787	monocarboxylic acid metabolic process	-18	5.1	12	24367	651	306	42	14	2	124|126|207|239|240|246|351|1109|1268|1545|1557|1565|1645|1646|2053|2166|2168|2170|2171|2739|3091|3643|5209|5319|5465|5467|5468|5595|5742|5743|6319|6916|7364|7376|8399|8644|8824|9536|10062|10327|27163|57704	ADH1A|ADH1C|AKT1|ALOX12|ALOX5|ALOX15|APP|AKR1C4|CNR1|CYP1B1|CYP2C19|CYP2D6|AKR1C1|AKR1C2|EPHX2|FAAH|FABP1|FABP3|FABP5|GLO1|HIF1A|INSR|PFKFB3|PLA2G1B|PPARA|PPARD|PPARG|MAPK3|PTGS1|PTGS2|SCD|TBXAS1|UGT2B7|NR1H2|PLA2G10|AKR1C3|CES2|PTGES|NR1H3|AKR1A1|NAAA|GBA2	-15
GO Biological Processes	GO:0043408	regulation of MAPK cascade	-17	4.8	12	24367	754	306	45	15	2	134|136|148|154|207|238|246|351|367|983|1139|1813|1815|1956|2322|2629|3156|3357|3358|3480|3643|3717|3791|3965|4317|5294|5319|5322|5578|5580|5585|5595|5770|5771|5777|5972|6093|6714|6850|7498|8654|8841|9475|50507|59340	ADORA1|ADORA2B|ADRA1A|ADRB2|AKT1|ALK|ALOX15|APP|AR|CDK1|CHRNA7|DRD2|DRD4|EGFR|FLT3|GBA|HMGCR|HTR2B|HTR2C|IGF1R|INSR|JAK2|KDR|LGALS9|MMP8|PIK3CG|PLA2G1B|PLA2G5|PRKCA|PRKCD|PKN1|MAPK3|PTPN1|PTPN2|PTPN6|REN|ROCK1|SRC|SYK|XDH|PDE5A|HDAC3|ROCK2|NOX4|HRH4	-15
GO Biological Processes	GO:0071242	cellular response to ammonium ion	-17	20	17	24367	69	306	17	5.6	1.3	1128|1129|1131|1132|1133|1136|1137|1139|1141|1812|3066|3269|5595|5724|8851|9475|59340	CHRM1|CHRM2|CHRM3|CHRM4|CHRM5|CHRNA3|CHRNA4|CHRNA7|CHRNB2|DRD1|HDAC2|HRH1|MAPK3|PTAFR|CDK5R1|ROCK2|HRH4	-15
GO Biological Processes	GO:0051222	positive regulation of protein transport	-17	6.4	13	24367	426	306	34	11	1.8	43|135|952|983|1020|1080|1128|1813|1956|2864|2932|3091|3357|3558|3717|3965|4317|4321|5295|5319|5467|5580|5595|5734|5743|5950|6469|6714|6721|6850|7376|8841|8851|27159	ACHE|ADORA2A|CD38|CDK1|CDK5|CFTR|CHRM1|DRD2|EGFR|FFAR1|GSK3B|HIF1A|HTR2B|IL2|JAK2|LGALS9|MMP8|MMP12|PIK3R1|PLA2G1B|PPARD|PRKCD|MAPK3|PTGER4|PTGS2|RBP4|SHH|SRC|SREBF2|SYK|NR1H2|HDAC3|CDK5R1|CHIA	-15
GO Biological Processes	GO:0071383	cellular response to steroid hormone stimulus	-17	8.6	14	24367	249	306	27	8.8	1.6	142|367|383|1956|2099|2100|2101|2322|2908|3717|4306|5241|5465|5467|5468|6095|6097|6714|6715|7376|7421|8644|8856|9612|9970|10013|10062	PARP1|AR|ARG1|EGFR|ESR1|ESR2|ESRRA|FLT3|NR3C1|JAK2|NR3C2|PGR|PPARA|PPARD|PPARG|RORA|RORC|SRC|SRD5A1|NR1H2|VDR|AKR1C3|NR1I2|NCOR2|NR1I3|HDAC6|NR1H3	-15
GO Biological Processes	GO:1904645	response to amyloid-beta	-17	22	18	24367	59	306	16	5.2	1.3	142|154|351|1020|1139|1759|2915|2932|3480|4313|4314|4318|4321|4322|4363|23621	PARP1|ADRB2|APP|CDK5|CHRNA7|DNM1|GRM5|GSK3B|IGF1R|MMP2|MMP3|MMP9|MMP12|MMP13|ABCC1|BACE1	-14
GO Biological Processes	GO:0051047	positive regulation of secretion	-17	6.2	12	24367	436	306	34	11	1.8	43|134|135|136|952|1020|1080|1141|1268|1588|1813|1814|1956|2864|3091|3357|3558|3717|3965|4317|4321|5319|5467|5595|5724|5734|5950|6532|6714|6850|7376|7442|8399|27159	ACHE|ADORA1|ADORA2A|ADORA2B|CD38|CDK5|CFTR|CHRNB2|CNR1|CYP19A1|DRD2|DRD3|EGFR|FFAR1|HIF1A|HTR2B|IL2|JAK2|LGALS9|MMP8|MMP12|PLA2G1B|PPARD|MAPK3|PTAFR|PTGER4|RBP4|SLC6A4|SRC|SYK|NR1H2|TRPV1|PLA2G10|CHIA	-14
GO Biological Processes	GO:0034614	cellular response to reactive oxygen species	-17	11	14	24367	170	306	23	7.5	1.5	207|328|383|558|983|1017|1545|1956|2168|3066|4137|4233|4313|4314|4318|4353|5580|5595|5601|6714|8644|10013|10280	AKT1|APEX1|ARG1|AXL|CDK1|CDK2|CYP1B1|EGFR|FABP1|HDAC2|MAPT|MET|MMP2|MMP3|MMP9|MPO|PRKCD|MAPK3|MAPK9|SRC|AKR1C3|HDAC6|SIGMAR1	-14
GO Biological Processes	GO:0045055	regulated exocytosis	-17	4.5	11	24367	796	306	45	15	2	135|136|148|240|351|383|1020|1075|1129|1137|1138|1141|1142|1143|1268|1508|1509|1812|1813|2171|2517|2932|3351|3577|3614|3674|3690|3958|3965|4311|4317|4318|4353|5294|5340|5580|5724|5777|5836|6093|6850|7276|8973|23621|29952	ADORA2A|ADORA2B|ADRA1A|ALOX5|APP|ARG1|CDK5|CTSC|CHRM2|CHRNA4|CHRNA5|CHRNB2|CHRNB3|CHRNB4|CNR1|CTSB|CTSD|DRD1|DRD2|FABP5|FUCA1|GSK3B|HTR1B|CXCR1|IMPDH1|ITGA2B|ITGB3|LGALS3|LGALS9|MME|MMP8|MMP9|MPO|PIK3CG|PLG|PRKCD|PTAFR|PTPN6|PYGL|ROCK1|SYK|TTR|CHRNA6|BACE1|DPP7	-14
GO Biological Processes	GO:0006631	fatty acid metabolic process	-17	6.7	13	24367	383	306	32	10	1.7	207|239|240|246|1109|1268|1545|1557|1565|1645|1646|2053|2166|2168|2170|2171|5319|5465|5467|5468|5595|5742|5743|6319|6916|7376|8399|8644|8824|9536|10062|27163	AKT1|ALOX12|ALOX5|ALOX15|AKR1C4|CNR1|CYP1B1|CYP2C19|CYP2D6|AKR1C1|AKR1C2|EPHX2|FAAH|FABP1|FABP3|FABP5|PLA2G1B|PPARA|PPARD|PPARG|MAPK3|PTGS1|PTGS2|SCD|TBXAS1|NR1H2|PLA2G10|AKR1C3|CES2|PTGES|NR1H3|NAAA	-14
GO Biological Processes	GO:0006874	cellular calcium ion homeostasis	-16	5.9	12	24367	472	306	35	11	1.8	134|148|351|952|1020|1139|1234|1268|1812|1813|1814|1815|2099|2147|2859|2864|2915|3351|3357|3358|3558|3577|3717|3741|5294|5319|5731|5732|5734|5777|6869|7421|7442|8989|59340	ADORA1|ADRA1A|APP|CD38|CDK5|CHRNA7|CCR5|CNR1|DRD1|DRD2|DRD3|DRD4|ESR1|F2|GPR35|FFAR1|GRM5|HTR1B|HTR2B|HTR2C|IL2|CXCR1|JAK2|KCNA5|PIK3CG|PLA2G1B|PTGER1|PTGER2|PTGER4|PTPN6|TACR1|VDR|TRPV1|TRPA1|HRH4	-14
GO Biological Processes	GO:0055065	metal ion homeostasis	-16	4.9	11	24367	668	306	41	13	1.9	134|135|148|351|554|952|1020|1139|1234|1268|1812|1813|1814|1815|1956|2099|2147|2859|2864|2915|3091|3351|3357|3358|3558|3577|3717|3741|3757|5294|5319|5731|5732|5734|5777|6869|7421|7442|8989|9429|59340	ADORA1|ADORA2A|ADRA1A|APP|AVPR2|CD38|CDK5|CHRNA7|CCR5|CNR1|DRD1|DRD2|DRD3|DRD4|EGFR|ESR1|F2|GPR35|FFAR1|GRM5|HIF1A|HTR1B|HTR2B|HTR2C|IL2|CXCR1|JAK2|KCNA5|KCNH2|PIK3CG|PLA2G1B|PTGER1|PTGER2|PTGER4|PTPN6|TACR1|VDR|TRPV1|TRPA1|ABCG2|HRH4	-14
GO Biological Processes	GO:0030003	cellular cation homeostasis	-16	4.9	11	24367	672	306	41	13	1.9	134|148|351|760|766|952|1020|1080|1139|1234|1268|1812|1813|1814|1815|2099|2147|2859|2864|2915|3091|3351|3357|3358|3558|3577|3717|3741|5294|5319|5595|5731|5732|5734|5777|6869|7421|7442|8989|9429|59340	ADORA1|ADRA1A|APP|CA2|CA7|CD38|CDK5|CFTR|CHRNA7|CCR5|CNR1|DRD1|DRD2|DRD3|DRD4|ESR1|F2|GPR35|FFAR1|GRM5|HIF1A|HTR1B|HTR2B|HTR2C|IL2|CXCR1|JAK2|KCNA5|PIK3CG|PLA2G1B|MAPK3|PTGER1|PTGER2|PTGER4|PTPN6|TACR1|VDR|TRPV1|TRPA1|ABCG2|HRH4	-14
GO Biological Processes	GO:0060627	regulation of vesicle-mediated transport	-16	5.4	12	24367	544	306	37	12	1.9	135|136|148|246|351|558|949|1020|1080|1129|1137|1138|1141|1142|1268|1759|1812|1813|1814|1815|2932|3351|3643|3690|3958|3965|5468|5595|5724|5770|6093|6714|6850|7376|8973|10062|23621	ADORA2A|ADORA2B|ADRA1A|ALOX15|APP|AXL|SCARB1|CDK5|CFTR|CHRM2|CHRNA4|CHRNA5|CHRNB2|CHRNB3|CNR1|DNM1|DRD1|DRD2|DRD3|DRD4|GSK3B|HTR1B|INSR|ITGB3|LGALS3|LGALS9|PPARG|MAPK3|PTAFR|PTPN1|ROCK1|SRC|SYK|NR1H2|CHRNA6|NR1H3|BACE1	-14
GO Biological Processes	GO:0055074	calcium ion homeostasis	-16	5.8	12	24367	484	306	35	11	1.8	134|148|351|952|1020|1139|1234|1268|1812|1813|1814|1815|2099|2147|2859|2864|2915|3351|3357|3358|3558|3577|3717|3741|5294|5319|5731|5732|5734|5777|6869|7421|7442|8989|59340	ADORA1|ADRA1A|APP|CD38|CDK5|CHRNA7|CCR5|CNR1|DRD1|DRD2|DRD3|DRD4|ESR1|F2|GPR35|FFAR1|GRM5|HTR1B|HTR2B|HTR2C|IL2|CXCR1|JAK2|KCNA5|PIK3CG|PLA2G1B|PTGER1|PTGER2|PTGER4|PTPN6|TACR1|VDR|TRPV1|TRPA1|HRH4	-14
GO Biological Processes	GO:0090066	regulation of anatomical structure size	-16	5.6	12	24367	515	306	36	12	1.8	134|135|136|148|154|207|239|246|554|952|1020|1131|1636|1812|1889|1956|2837|2932|3156|3269|3350|3351|3352|3357|3741|4137|5467|5580|5724|5743|5802|6093|6532|8851|9475|57704	ADORA1|ADORA2A|ADORA2B|ADRA1A|ADRB2|AKT1|ALOX12|ALOX15|AVPR2|CD38|CDK5|CHRM3|ACE|DRD1|ECE1|EGFR|UTS2R|GSK3B|HMGCR|HRH1|HTR1A|HTR1B|HTR1D|HTR2B|KCNA5|MAPT|PPARD|PRKCD|PTAFR|PTGS2|PTPRS|ROCK1|SLC6A4|CDK5R1|ROCK2|GBA2	-14
GO Biological Processes	GO:0042310	vasoconstriction	-16	18	16	24367	77	306	17	5.6	1.3	148|207|554|952|1131|1636|1889|1956|3269|3350|3351|3352|3357|3741|5724|5743|6532	ADRA1A|AKT1|AVPR2|CD38|CHRM3|ACE|ECE1|EGFR|HRH1|HTR1A|HTR1B|HTR1D|HTR2B|KCNA5|PTAFR|PTGS2|SLC6A4	-14
GO Biological Processes	GO:0051480	regulation of cytosolic calcium ion concentration	-16	6.6	12	24367	373	306	31	10	1.7	134|148|952|1020|1234|1268|1812|1813|1814|2099|2147|2859|2864|2915|3351|3357|3358|3558|3577|3717|3741|5294|5319|5731|5732|5734|5777|6869|7442|8989|59340	ADORA1|ADRA1A|CD38|CDK5|CCR5|CNR1|DRD1|DRD2|DRD3|ESR1|F2|GPR35|FFAR1|GRM5|HTR1B|HTR2B|HTR2C|IL2|CXCR1|JAK2|KCNA5|PIK3CG|PLA2G1B|PTGER1|PTGER2|PTGER4|PTPN6|TACR1|TRPV1|TRPA1|HRH4	-14
GO Biological Processes	GO:0015696	ammonium transport	-16	14	15	24367	108	306	19	6.2	1.4	135|1133|1136|1137|1141|1268|1812|1813|1814|1815|3350|3351|3690|6530|6531|6532|6572|6850|8973	ADORA2A|CHRM5|CHRNA3|CHRNA4|CHRNB2|CNR1|DRD1|DRD2|DRD3|DRD4|HTR1A|HTR1B|ITGB3|SLC6A2|SLC6A3|SLC6A4|SLC18A3|SYK|CHRNA6	-14
GO Biological Processes	GO:0043410	positive regulation of MAPK cascade	-16	5.3	12	24367	552	306	37	12	1.9	134|136|148|154|238|246|351|367|983|1139|1813|1815|1956|2322|3156|3357|3358|3480|3643|3717|3791|3965|4317|5294|5319|5322|5578|5585|5595|5770|6093|6714|6850|7498|8654|9475|50507	ADORA1|ADORA2B|ADRA1A|ADRB2|ALK|ALOX15|APP|AR|CDK1|CHRNA7|DRD2|DRD4|EGFR|FLT3|HMGCR|HTR2B|HTR2C|IGF1R|INSR|JAK2|KDR|LGALS9|MMP8|PIK3CG|PLA2G1B|PLA2G5|PRKCA|PKN1|MAPK3|PTPN1|ROCK1|SRC|SYK|XDH|PDE5A|ROCK2|NOX4	-14
GO Biological Processes	GO:0006873	cellular ion homeostasis	-16	4.8	11	24367	685	306	41	13	1.9	134|148|351|760|766|952|1020|1080|1139|1234|1268|1812|1813|1814|1815|2099|2147|2859|2864|2915|3091|3351|3357|3358|3558|3577|3717|3741|5294|5319|5595|5731|5732|5734|5777|6869|7421|7442|8989|9429|59340	ADORA1|ADRA1A|APP|CA2|CA7|CD38|CDK5|CFTR|CHRNA7|CCR5|CNR1|DRD1|DRD2|DRD3|DRD4|ESR1|F2|GPR35|FFAR1|GRM5|HIF1A|HTR1B|HTR2B|HTR2C|IL2|CXCR1|JAK2|KCNA5|PIK3CG|PLA2G1B|MAPK3|PTGER1|PTGER2|PTGER4|PTPN6|TACR1|VDR|TRPV1|TRPA1|ABCG2|HRH4	-14
GO Biological Processes	GO:0098664	G protein-coupled serotonin receptor signaling pathway	-16	30	19	24367	34	306	13	4.2	1.2	1128|1129|1131|1132|1133|1815|3269|3350|3351|3352|3357|3358|59340	CHRM1|CHRM2|CHRM3|CHRM4|CHRM5|DRD4|HRH1|HTR1A|HTR1B|HTR1D|HTR2B|HTR2C|HRH4	-14
GO Biological Processes	GO:0003012	muscle system process	-16	5.9	12	24367	462	306	34	11	1.8	134|136|142|148|154|816|952|1129|1131|1136|1141|1143|1812|1813|2539|2741|3066|3352|3357|3741|3757|4638|5294|5465|5578|5724|5743|5747|6093|6331|6869|7442|8654|9475	ADORA1|ADORA2B|PARP1|ADRA1A|ADRB2|CAMK2B|CD38|CHRM2|CHRM3|CHRNA3|CHRNB2|CHRNB4|DRD1|DRD2|G6PD|GLRA1|HDAC2|HTR1D|HTR2B|KCNA5|KCNH2|MYLK|PIK3CG|PPARA|PRKCA|PTAFR|PTGS2|PTK2|ROCK1|SCN5A|TACR1|TRPV1|PDE5A|ROCK2	-14
GO Biological Processes	GO:1904951	positive regulation of establishment of protein localization	-16	5.8	12	24367	464	306	34	11	1.8	43|135|952|983|1020|1080|1128|1813|1956|2864|2932|3091|3357|3558|3717|3965|4317|4321|5295|5319|5467|5580|5595|5734|5743|5950|6469|6714|6721|6850|7376|8841|8851|27159	ACHE|ADORA2A|CD38|CDK1|CDK5|CFTR|CHRM1|DRD2|EGFR|FFAR1|GSK3B|HIF1A|HTR2B|IL2|JAK2|LGALS9|MMP8|MMP12|PIK3R1|PLA2G1B|PPARD|PRKCD|MAPK3|PTGER4|PTGS2|RBP4|SHH|SRC|SREBF2|SYK|NR1H2|HDAC3|CDK5R1|CHIA	-14
GO Biological Processes	GO:0072507	divalent inorganic cation homeostasis	-16	5.5	12	24367	526	306	36	12	1.8	134|148|351|952|1020|1139|1234|1268|1812|1813|1814|1815|1956|2099|2147|2859|2864|2915|3351|3357|3358|3558|3577|3717|3741|5294|5319|5731|5732|5734|5777|6869|7421|7442|8989|59340	ADORA1|ADRA1A|APP|CD38|CDK5|CHRNA7|CCR5|CNR1|DRD1|DRD2|DRD3|DRD4|EGFR|ESR1|F2|GPR35|FFAR1|GRM5|HTR1B|HTR2B|HTR2C|IL2|CXCR1|JAK2|KCNA5|PIK3CG|PLA2G1B|PTGER1|PTGER2|PTGER4|PTPN6|TACR1|VDR|TRPV1|TRPA1|HRH4	-14
GO Biological Processes	GO:0019369	arachidonic acid metabolic process	-16	22	17	24367	55	306	15	4.9	1.2	239|240|246|1545|1557|1565|2053|2166|5595|5742|5743|6916|8399|8644|9536	ALOX12|ALOX5|ALOX15|CYP1B1|CYP2C19|CYP2D6|EPHX2|FAAH|MAPK3|PTGS1|PTGS2|TBXAS1|PLA2G10|AKR1C3|PTGES	-14
GO Biological Processes	GO:0042180	cellular ketone metabolic process	-16	8.2	13	24367	252	306	26	8.5	1.6	207|231|1109|1268|1586|1588|1645|1646|2168|2170|2171|2739|3156|3293|5465|5467|5468|5743|6715|6716|7376|8644|9612|10062|10327|57016	AKT1|AKR1B1|AKR1C4|CNR1|CYP17A1|CYP19A1|AKR1C1|AKR1C2|FABP1|FABP3|FABP5|GLO1|HMGCR|HSD17B3|PPARA|PPARD|PPARG|PTGS2|SRD5A1|SRD5A2|NR1H2|AKR1C3|NCOR2|NR1H3|AKR1A1|AKR1B10	-14
GO Biological Processes	GO:0043270	positive regulation of ion transport	-16	7.8	13	24367	277	306	27	8.8	1.6	134|135|154|207|1020|1080|1128|1141|1812|1813|1815|2147|2170|2539|2864|2916|3359|3757|3958|4638|5243|5319|5580|5724|6331|6532|8399	ADORA1|ADORA2A|ADRB2|AKT1|CDK5|CFTR|CHRM1|CHRNB2|DRD1|DRD2|DRD4|F2|FABP3|G6PD|FFAR1|GRM6|HTR3A|KCNH2|LGALS3|MYLK|ABCB1|PLA2G1B|PRKCD|PTAFR|SCN5A|SLC6A4|PLA2G10	-14
GO Biological Processes	GO:0007623	circadian rhythm	-16	9.1	13	24367	211	306	24	7.8	1.5	134|135|196|983|1141|1813|1814|1815|1956|2932|3066|4843|5465|5468|5601|6095|6097|6532|6715|7150|7153|8841|9475|10062	ADORA1|ADORA2A|AHR|CDK1|CHRNB2|DRD2|DRD3|DRD4|EGFR|GSK3B|HDAC2|NOS2|PPARA|PPARG|MAPK9|RORA|RORC|SLC6A4|SRD5A1|TOP1|TOP2A|HDAC3|ROCK2|NR1H3	-13
GO Biological Processes	GO:0016125	sterol metabolic process	-16	10	14	24367	169	306	22	7.2	1.5	351|949|1080|1545|1565|1588|1595|1717|2053|2222|2539|2629|3156|5467|6319|6646|6713|6721|8435|29881|51478|57704	APP|SCARB1|CFTR|CYP1B1|CYP2D6|CYP19A1|CYP51A1|DHCR7|EPHX2|FDFT1|G6PD|GBA|HMGCR|PPARD|SCD|SOAT1|SQLE|SREBF2|SOAT2|NPC1L1|HSD17B7|GBA2	-13
GO Biological Processes	GO:0098693	regulation of synaptic vesicle cycle	-16	13	15	24367	114	306	19	6.2	1.4	135|136|148|1020|1129|1137|1138|1141|1142|1268|1759|1812|1813|2932|3351|6093|8851|8973|23621	ADORA2A|ADORA2B|ADRA1A|CDK5|CHRM2|CHRNA4|CHRNA5|CHRNB2|CHRNB3|CNR1|DNM1|DRD1|DRD2|GSK3B|HTR1B|ROCK1|CDK5R1|CHRNA6|BACE1	-13
GO Biological Processes	GO:0072503	cellular divalent inorganic cation homeostasis	-16	5.5	12	24367	507	306	35	11	1.8	134|148|351|952|1020|1139|1234|1268|1812|1813|1814|1815|2099|2147|2859|2864|2915|3351|3357|3358|3558|3577|3717|3741|5294|5319|5731|5732|5734|5777|6869|7421|7442|8989|59340	ADORA1|ADRA1A|APP|CD38|CDK5|CHRNA7|CCR5|CNR1|DRD1|DRD2|DRD3|DRD4|ESR1|F2|GPR35|FFAR1|GRM5|HTR1B|HTR2B|HTR2C|IL2|CXCR1|JAK2|KCNA5|PIK3CG|PLA2G1B|PTGER1|PTGER2|PTGER4|PTPN6|TACR1|VDR|TRPV1|TRPA1|HRH4	-13
GO Biological Processes	GO:0000302	response to reactive oxygen species	-15	8.4	13	24367	236	306	25	8.2	1.6	207|328|383|558|983|1017|1545|1956|2168|3066|3741|4137|4233|4313|4314|4318|4353|5580|5595|5601|6714|8644|8989|10013|10280	AKT1|APEX1|ARG1|AXL|CDK1|CDK2|CYP1B1|EGFR|FABP1|HDAC2|KCNA5|MAPT|MET|MMP2|MMP3|MMP9|MPO|PRKCD|MAPK3|MAPK9|SRC|AKR1C3|TRPA1|HDAC6|SIGMAR1	-13
GO Biological Processes	GO:0099643	signal release from synapse	-15	10	14	24367	172	306	22	7.2	1.5	135|136|148|1020|1129|1136|1137|1138|1141|1142|1143|1268|1812|1813|2932|3351|6536|6572|6582|8973|23621|27163	ADORA2A|ADORA2B|ADRA1A|CDK5|CHRM2|CHRNA3|CHRNA4|CHRNA5|CHRNB2|CHRNB3|CHRNB4|CNR1|DRD1|DRD2|GSK3B|HTR1B|SLC6A9|SLC18A3|SLC22A2|CHRNA6|BACE1|NAAA	-13
GO Biological Processes	GO:0007269	neurotransmitter secretion	-15	10	14	24367	172	306	22	7.2	1.5	135|136|148|1020|1129|1136|1137|1138|1141|1142|1143|1268|1812|1813|2932|3351|6536|6572|6582|8973|23621|27163	ADORA2A|ADORA2B|ADRA1A|CDK5|CHRM2|CHRNA3|CHRNA4|CHRNA5|CHRNB2|CHRNB3|CHRNB4|CNR1|DRD1|DRD2|GSK3B|HTR1B|SLC6A9|SLC18A3|SLC22A2|CHRNA6|BACE1|NAAA	-13
GO Biological Processes	GO:0002791	regulation of peptide secretion	-15	5.4	11	24367	520	306	35	11	1.8	43|134|135|952|1080|1268|1595|1803|1813|1814|1815|1956|2864|3091|3156|3357|3358|3558|3717|3741|3965|4317|4321|4843|5319|5467|5578|5595|5734|5950|6714|6850|7376|10062|27159	ACHE|ADORA1|ADORA2A|CD38|CFTR|CNR1|CYP51A1|DPP4|DRD2|DRD3|DRD4|EGFR|FFAR1|HIF1A|HMGCR|HTR2B|HTR2C|IL2|JAK2|KCNA5|LGALS9|MMP8|MMP12|NOS2|PLA2G1B|PPARD|PRKCA|MAPK3|PTGER4|RBP4|SRC|SYK|NR1H2|NR1H3|CHIA	-13
GO Biological Processes	GO:0042446	hormone biosynthetic process	-15	16	15	24367	87	306	17	5.6	1.3	231|949|1586|1588|1717|3091|3283|3290|3291|3292|3293|3294|6715|6716|7421|8644|51478	AKR1B1|SCARB1|CYP17A1|CYP19A1|DHCR7|HIF1A|HSD3B1|HSD11B1|HSD11B2|HSD17B1|HSD17B3|HSD17B2|SRD5A1|SRD5A2|VDR|AKR1C3|HSD17B7	-13
GO Biological Processes	GO:1901654	response to ketone	-15	9.3	13	24367	198	306	23	7.5	1.5	142|196|207|231|367|383|768|952|1080|1646|1956|2629|2908|3283|5468|5724|5732|5734|6714|6715|8644|9475|10062	PARP1|AHR|AKT1|AKR1B1|AR|ARG1|CA9|CD38|CFTR|AKR1C2|EGFR|GBA|NR3C1|HSD3B1|PPARG|PTAFR|PTGER2|PTGER4|SRC|SRD5A1|AKR1C3|ROCK2|NR1H3	-13
GO Biological Processes	GO:0015844	monoamine transport	-15	15	15	24367	88	306	17	5.6	1.3	135|1133|1137|1141|1268|1812|1813|1814|1815|3350|3351|3690|6530|6531|6532|6850|8973	ADORA2A|CHRM5|CHRNA4|CHRNB2|CNR1|DRD1|DRD2|DRD3|DRD4|HTR1A|HTR1B|ITGB3|SLC6A2|SLC6A3|SLC6A4|SYK|CHRNA6	-13
GO Biological Processes	GO:1905145	cellular response to acetylcholine	-15	32	19	24367	30	306	12	3.9	1.1	1128|1129|1131|1132|1133|1136|1137|1139|1141|8851|9475|59340	CHRM1|CHRM2|CHRM3|CHRM4|CHRM5|CHRNA3|CHRNA4|CHRNA7|CHRNB2|CDK5R1|ROCK2|HRH4	-13
GO Biological Processes	GO:1905144	response to acetylcholine	-15	32	19	24367	30	306	12	3.9	1.1	1128|1129|1131|1132|1133|1136|1137|1139|1141|8851|9475|59340	CHRM1|CHRM2|CHRM3|CHRM4|CHRM5|CHRNA3|CHRNA4|CHRNA7|CHRNB2|CDK5R1|ROCK2|HRH4	-13
GO Biological Processes	GO:0007586	digestion	-15	11	14	24367	139	306	20	6.5	1.4	949|1128|1131|1133|1645|1646|1814|2168|5225|5731|5950|6523|7357|7376|7421|7442|8435|10062|27159|29881	SCARB1|CHRM1|CHRM3|CHRM5|AKR1C1|AKR1C2|DRD3|FABP1|PGC|PTGER1|RBP4|SLC5A1|UGCG|NR1H2|VDR|TRPV1|SOAT2|NR1H3|CHIA|NPC1L1	-13
GO Biological Processes	GO:0007193	adenylate cyclase-inhibiting G protein-coupled receptor signaling pathway	-15	15	15	24367	89	306	17	5.6	1.3	134|1128|1129|1131|1132|1133|1813|1814|1815|2912|2913|2916|2918|3350|3351|3352|59340	ADORA1|CHRM1|CHRM2|CHRM3|CHRM4|CHRM5|DRD2|DRD3|DRD4|GRM2|GRM3|GRM6|GRM8|HTR1A|HTR1B|HTR1D|HRH4	-13
GO Biological Processes	GO:0035094	response to nicotine	-15	22	17	24367	50	306	14	4.6	1.2	1135|1136|1137|1138|1139|1141|1142|1143|1268|1813|3066|5465|6531|8973	CHRNA2|CHRNA3|CHRNA4|CHRNA5|CHRNA7|CHRNB2|CHRNB3|CHRNB4|CNR1|DRD2|HDAC2|PPARA|SLC6A3|CHRNA6	-13
GO Biological Processes	GO:0006875	cellular metal ion homeostasis	-15	4.9	11	24367	596	306	37	12	1.9	134|148|351|952|1020|1139|1234|1268|1812|1813|1814|1815|2099|2147|2859|2864|2915|3091|3351|3357|3358|3558|3577|3717|3741|5294|5319|5731|5732|5734|5777|6869|7421|7442|8989|9429|59340	ADORA1|ADRA1A|APP|CD38|CDK5|CHRNA7|CCR5|CNR1|DRD1|DRD2|DRD3|DRD4|ESR1|F2|GPR35|FFAR1|GRM5|HIF1A|HTR1B|HTR2B|HTR2C|IL2|CXCR1|JAK2|KCNA5|PIK3CG|PLA2G1B|PTGER1|PTGER2|PTGER4|PTPN6|TACR1|VDR|TRPV1|TRPA1|ABCG2|HRH4	-13
GO Biological Processes	GO:0046928	regulation of neurotransmitter secretion	-15	14	15	24367	106	306	18	5.9	1.3	135|136|148|1020|1129|1136|1137|1138|1141|1142|1143|1268|1812|1813|2932|3351|8973|23621	ADORA2A|ADORA2B|ADRA1A|CDK5|CHRM2|CHRNA3|CHRNA4|CHRNA5|CHRNB2|CHRNB3|CHRNB4|CNR1|DRD1|DRD2|GSK3B|HTR1B|CHRNA6|BACE1	-13
GO Biological Processes	GO:0018209	peptidyl-serine modification	-15	6.8	12	24367	326	306	28	9.2	1.6	142|207|351|891|983|1017|1020|1457|1812|1956|2932|5347|5578|5580|5585|5595|5601|5743|6093|6714|6850|7150|8658|8851|9212|9475|10013|10783	PARP1|AKT1|APP|CCNB1|CDK1|CDK2|CDK5|CSNK2A1|DRD1|EGFR|GSK3B|PLK1|PRKCA|PRKCD|PKN1|MAPK3|MAPK9|PTGS2|ROCK1|SRC|SYK|TOP1|TNKS|CDK5R1|AURKB|ROCK2|HDAC6|NEK6	-13
GO Biological Processes	GO:0007271	synaptic transmission, cholinergic	-15	31	19	24367	31	306	12	3.9	1.1	43|135|1131|1135|1136|1137|1138|1139|1141|1142|1143|8973	ACHE|ADORA2A|CHRM3|CHRNA2|CHRNA3|CHRNA4|CHRNA5|CHRNA7|CHRNB2|CHRNB3|CHRNB4|CHRNA6	-13
GO Biological Processes	GO:0043401	steroid hormone mediated signaling pathway	-15	9.6	13	24367	182	306	22	7.2	1.5	142|367|2099|2100|2101|2908|3717|4306|5241|5465|5467|5468|6095|6097|6714|7376|7421|8856|9612|9970|10013|10062	PARP1|AR|ESR1|ESR2|ESRRA|NR3C1|JAK2|NR3C2|PGR|PPARA|PPARD|PPARG|RORA|RORC|SRC|NR1H2|VDR|NR1I2|NCOR2|NR1I3|HDAC6|NR1H3	-13
GO Biological Processes	GO:0008217	regulation of blood pressure	-15	9.6	13	24367	183	306	22	7.2	1.5	134|148|154|367|554|1268|1636|1813|1814|1889|2837|3291|4311|4843|5465|5468|5724|5742|5743|5972|6051|7442	ADORA1|ADRA1A|ADRB2|AR|AVPR2|CNR1|ACE|DRD2|DRD3|ECE1|UTS2R|HSD11B2|MME|NOS2|PPARA|PPARG|PTAFR|PTGS1|PTGS2|REN|RNPEP|TRPV1	-13
GO Biological Processes	GO:0018105	peptidyl-serine phosphorylation	-15	7.1	12	24367	303	306	27	8.8	1.6	207|351|891|983|1017|1020|1457|1812|1956|2932|5347|5578|5580|5585|5595|5601|5743|6093|6714|6850|7150|8658|8851|9212|9475|10013|10783	AKT1|APP|CCNB1|CDK1|CDK2|CDK5|CSNK2A1|DRD1|EGFR|GSK3B|PLK1|PRKCA|PRKCD|PKN1|MAPK3|MAPK9|PTGS2|ROCK1|SRC|SYK|TOP1|TNKS|CDK5R1|AURKB|ROCK2|HDAC6|NEK6	-13
GO Biological Processes	GO:0015849	organic acid transport	-15	6.7	12	24367	334	306	28	9.2	1.6	134|135|207|383|1109|1636|1645|1813|1814|1815|2167|2168|2170|2912|3351|4363|4843|5319|5322|5465|5467|5468|6536|6850|7442|8399|9429|391013	ADORA1|ADORA2A|AKT1|ARG1|AKR1C4|ACE|AKR1C1|DRD2|DRD3|DRD4|FABP4|FABP1|FABP3|GRM2|HTR1B|ABCC1|NOS2|PLA2G1B|PLA2G5|PPARA|PPARD|PPARG|SLC6A9|SYK|TRPV1|PLA2G10|ABCG2|PLA2G2C	-12
GO Biological Processes	GO:0046942	carboxylic acid transport	-15	6.7	12	24367	334	306	28	9.2	1.6	134|135|207|383|1109|1636|1645|1813|1814|1815|2167|2168|2170|2912|3351|4363|4843|5319|5322|5465|5467|5468|6536|6850|7442|8399|9429|391013	ADORA1|ADORA2A|AKT1|ARG1|AKR1C4|ACE|AKR1C1|DRD2|DRD3|DRD4|FABP4|FABP1|FABP3|GRM2|HTR1B|ABCC1|NOS2|PLA2G1B|PLA2G5|PPARA|PPARD|PPARG|SLC6A9|SYK|TRPV1|PLA2G10|ABCG2|PLA2G2C	-12
GO Biological Processes	GO:0030522	intracellular receptor signaling pathway	-15	7.3	12	24367	282	306	26	8.5	1.6	142|196|246|367|2099|2100|2101|2171|2908|3717|5241|5292|5465|5467|5468|6095|6097|6714|7376|7421|8644|8856|9612|9970|10013|10062	PARP1|AHR|ALOX15|AR|ESR1|ESR2|ESRRA|FABP5|NR3C1|JAK2|PGR|PIM1|PPARA|PPARD|PPARG|RORA|RORC|SRC|NR1H2|VDR|AKR1C3|NR1I2|NCOR2|NR1I3|HDAC6|NR1H3	-12
GO Biological Processes	GO:0009755	hormone-mediated signaling pathway	-15	8.2	12	24367	233	306	24	7.8	1.5	142|367|1394|2099|2100|2101|2908|3717|4306|5241|5465|5467|5468|5972|6095|6097|6714|7376|7421|8856|9612|9970|10013|10062	PARP1|AR|CRHR1|ESR1|ESR2|ESRRA|NR3C1|JAK2|NR3C2|PGR|PPARA|PPARD|PPARG|REN|RORA|RORC|SRC|NR1H2|VDR|NR1I2|NCOR2|NR1I3|HDAC6|NR1H3	-12
GO Biological Processes	GO:2000300	regulation of synaptic vesicle exocytosis	-14	16	15	24367	80	306	16	5.2	1.3	135|136|148|1020|1129|1137|1138|1141|1142|1268|1812|1813|2932|3351|8973|23621	ADORA2A|ADORA2B|ADRA1A|CDK5|CHRM2|CHRNA4|CHRNA5|CHRNB2|CHRNB3|CNR1|DRD1|DRD2|GSK3B|HTR1B|CHRNA6|BACE1	-12
GO Biological Processes	GO:0070482	response to oxygen levels	-14	6.1	11	24367	394	306	30	9.8	1.7	134|207|768|891|952|1137|1139|1141|1803|1813|2030|2168|3066|3091|3291|3741|3776|4313|4843|5423|5465|5467|5468|5743|6095|6532|6714|7015|9475|50507	ADORA1|AKT1|CA9|CCNB1|CD38|CHRNA4|CHRNA7|CHRNB2|DPP4|DRD2|SLC29A1|FABP1|HDAC2|HIF1A|HSD11B2|KCNA5|KCNK2|MMP2|NOS2|POLB|PPARA|PPARD|PPARG|PTGS2|RORA|SLC6A4|SRC|TERT|ROCK2|NOX4	-12
GO Biological Processes	GO:0032496	response to lipopolysaccharide	-14	6.6	12	24367	338	306	28	9.2	1.6	207|383|558|949|1234|1268|1269|3066|3717|3965|4353|4843|5467|5578|5595|5724|5731|5732|5734|5743|5972|6714|7376|7421|8856|9536|9970|10062	AKT1|ARG1|AXL|SCARB1|CCR5|CNR1|CNR2|HDAC2|JAK2|LGALS9|MPO|NOS2|PPARD|PRKCA|MAPK3|PTAFR|PTGER1|PTGER2|PTGER4|PTGS2|REN|SRC|NR1H2|VDR|NR1I2|PTGES|NR1I3|NR1H3	-12
GO Biological Processes	GO:0015718	monocarboxylic acid transport	-14	9.9	13	24367	169	306	21	6.9	1.4	207|1109|1636|1645|1813|1814|1815|2167|2168|2170|3351|4843|5319|5322|5465|5467|5468|6850|8399|9429|391013	AKT1|AKR1C4|ACE|AKR1C1|DRD2|DRD3|DRD4|FABP4|FABP1|FABP3|HTR1B|NOS2|PLA2G1B|PLA2G5|PPARA|PPARD|PPARG|SYK|PLA2G10|ABCG2|PLA2G2C	-12
GO Biological Processes	GO:0048871	multicellular organismal homeostasis	-14	5.4	11	24367	487	306	33	11	1.8	43|134|154|231|239|554|760|952|1080|1268|1513|1812|1813|1956|2167|2171|2629|3480|3690|3717|4233|5578|5743|5950|6319|6714|6850|7357|7376|7442|8841|10062|50507	ACHE|ADORA1|ADRB2|AKR1B1|ALOX12|AVPR2|CA2|CD38|CFTR|CNR1|CTSK|DRD1|DRD2|EGFR|FABP4|FABP5|GBA|IGF1R|ITGB3|JAK2|MET|PRKCA|PTGS2|RBP4|SCD|SRC|SYK|UGCG|NR1H2|TRPV1|HDAC3|NR1H3|NOX4	-12
GO Biological Processes	GO:0015908	fatty acid transport	-14	14	15	24367	96	306	17	5.6	1.3	207|1636|1813|1814|1815|2167|2168|2170|4843|5319|5322|5465|5467|5468|6850|8399|391013	AKT1|ACE|DRD2|DRD3|DRD4|FABP4|FABP1|FABP3|NOS2|PLA2G1B|PLA2G5|PPARA|PPARD|PPARG|SYK|PLA2G10|PLA2G2C	-12
GO Biological Processes	GO:1901653	cellular response to peptide	-14	6	11	24367	397	306	30	9.8	1.7	142|154|207|231|328|351|383|760|1020|1394|2101|2915|2932|3480|3643|3717|3718|4363|5295|5319|5468|5580|5747|5770|5771|6093|6714|6715|9475|23621	PARP1|ADRB2|AKT1|AKR1B1|APEX1|APP|ARG1|CA2|CDK5|CRHR1|ESRRA|GRM5|GSK3B|IGF1R|INSR|JAK2|JAK3|ABCC1|PIK3R1|PLA2G1B|PPARG|PRKCD|PTK2|PTPN1|PTPN2|ROCK1|SRC|SRD5A1|ROCK2|BACE1	-12
GO Biological Processes	GO:0032963	collagen metabolic process	-14	13	14	24367	113	306	18	5.9	1.3	383|1508|1509|1513|1514|2147|3066|3091|4312|4313|4314|4316|4317|4318|4321|4322|5467|5468	ARG1|CTSB|CTSD|CTSK|CTSL|F2|HDAC2|HIF1A|MMP1|MMP2|MMP3|MMP7|MMP8|MMP9|MMP12|MMP13|PPARD|PPARG	-12
GO Biological Processes	GO:0018108	peptidyl-tyrosine phosphorylation	-14	6.2	11	24367	371	306	29	9.5	1.7	134|148|238|351|558|1636|1956|2322|2915|3066|3480|3558|3643|3690|3716|3717|3718|3791|4233|5580|5595|5747|5770|5771|5777|6714|6850|7297|50507	ADORA1|ADRA1A|ALK|APP|AXL|ACE|EGFR|FLT3|GRM5|HDAC2|IGF1R|IL2|INSR|ITGB3|JAK1|JAK2|JAK3|KDR|MET|PRKCD|MAPK3|PTK2|PTPN1|PTPN2|PTPN6|SRC|SYK|TYK2|NOX4	-12
GO Biological Processes	GO:0050708	regulation of protein secretion	-14	5.3	11	24367	492	306	33	11	1.8	43|135|952|1080|1268|1595|1803|1813|1814|1815|1956|2864|3091|3156|3357|3558|3717|3741|3965|4317|4321|4843|5319|5467|5578|5595|5734|5950|6714|6850|7376|10062|27159	ACHE|ADORA2A|CD38|CFTR|CNR1|CYP51A1|DPP4|DRD2|DRD3|DRD4|EGFR|FFAR1|HIF1A|HMGCR|HTR2B|IL2|JAK2|KCNA5|LGALS9|MMP8|MMP12|NOS2|PLA2G1B|PPARD|PRKCA|MAPK3|PTGER4|RBP4|SRC|SYK|NR1H2|NR1H3|CHIA	-12
GO Biological Processes	GO:0018212	peptidyl-tyrosine modification	-14	6.2	11	24367	374	306	29	9.5	1.7	134|148|238|351|558|1636|1956|2322|2915|3066|3480|3558|3643|3690|3716|3717|3718|3791|4233|5580|5595|5747|5770|5771|5777|6714|6850|7297|50507	ADORA1|ADRA1A|ALK|APP|AXL|ACE|EGFR|FLT3|GRM5|HDAC2|IGF1R|IL2|INSR|ITGB3|JAK1|JAK2|JAK3|KDR|MET|PRKCD|MAPK3|PTK2|PTPN1|PTPN2|PTPN6|SRC|SYK|TYK2|NOX4	-12
GO Biological Processes	GO:0001101	response to acid chemical	-14	6.4	11	24367	347	306	28	9.2	1.6	207|231|383|590|891|952|1109|1645|1646|1956|2170|2741|2864|3066|3294|3791|4313|5468|5724|5732|5734|5743|5950|6319|6532|6714|8644|9536	AKT1|AKR1B1|ARG1|BCHE|CCNB1|CD38|AKR1C4|AKR1C1|AKR1C2|EGFR|FABP3|GLRA1|FFAR1|HDAC2|HSD17B2|KDR|MMP2|PPARG|PTAFR|PTGER2|PTGER4|PTGS2|RBP4|SCD|SLC6A4|SRC|AKR1C3|PTGES	-12
GO Biological Processes	GO:0043112	receptor metabolic process	-14	8.9	13	24367	196	306	22	7.2	1.5	43|1020|1759|1813|1814|1815|1889|2339|3066|3091|3351|3357|3577|3643|3690|3717|5465|5468|5770|6850|10013|10062	ACHE|CDK5|DNM1|DRD2|DRD3|DRD4|ECE1|FNTA|HDAC2|HIF1A|HTR1B|HTR2B|CXCR1|INSR|ITGB3|JAK2|PPARA|PPARG|PTPN1|SYK|HDAC6|NR1H3	-12
GO Biological Processes	GO:0032386	regulation of intracellular transport	-14	5.7	11	24367	435	306	31	10	1.7	135|136|148|983|1020|1128|1129|1137|1138|1141|1142|1268|1812|1813|2932|3351|3717|3965|5295|5580|5595|5743|5770|6469|6714|6721|6850|8841|8851|8973|23621	ADORA2A|ADORA2B|ADRA1A|CDK1|CDK5|CHRM1|CHRM2|CHRNA4|CHRNA5|CHRNB2|CHRNB3|CNR1|DRD1|DRD2|GSK3B|HTR1B|JAK2|LGALS9|PIK3R1|PRKCD|MAPK3|PTGS2|PTPN1|SHH|SRC|SREBF2|SYK|HDAC3|CDK5R1|CHRNA6|BACE1	-12
GO Biological Processes	GO:0008203	cholesterol metabolic process	-14	10	13	24367	154	306	20	6.5	1.4	351|949|1080|1565|1595|1717|2053|2222|2539|2629|3156|5467|6319|6646|6713|6721|8435|29881|51478|57704	APP|SCARB1|CFTR|CYP2D6|CYP51A1|DHCR7|EPHX2|FDFT1|G6PD|GBA|HMGCR|PPARD|SCD|SOAT1|SQLE|SREBF2|SOAT2|NPC1L1|HSD17B7|GBA2	-12
GO Biological Processes	GO:1903532	positive regulation of secretion by cell	-14	5.9	11	24367	406	306	30	9.8	1.7	43|135|136|952|1020|1080|1141|1268|1588|1813|1956|2864|3091|3357|3558|3717|3965|4317|4321|5319|5467|5595|5724|5734|5950|6532|6714|6850|7376|27159	ACHE|ADORA2A|ADORA2B|CD38|CDK5|CFTR|CHRNB2|CNR1|CYP19A1|DRD2|EGFR|FFAR1|HIF1A|HTR2B|IL2|JAK2|LGALS9|MMP8|MMP12|PLA2G1B|PPARD|MAPK3|PTAFR|PTGER4|RBP4|SLC6A4|SRC|SYK|NR1H2|CHIA	-12
GO Biological Processes	GO:0022600	digestive system process	-14	14	14	24367	100	306	17	5.6	1.3	949|1128|1131|1133|1645|1814|2168|5731|5950|6523|7357|7376|7421|7442|8435|10062|29881	SCARB1|CHRM1|CHRM3|CHRM5|AKR1C1|DRD3|FABP1|PTGER1|RBP4|SLC5A1|UGCG|NR1H2|VDR|TRPV1|SOAT2|NR1H3|NPC1L1	-12
GO Biological Processes	GO:0062013	positive regulation of small molecule metabolic process	-14	10	13	24367	157	306	20	6.5	1.4	136|207|351|891|983|2168|3091|3269|3643|4843|5209|5465|5467|5468|5724|5743|5771|6714|7376|10062	ADORA2B|AKT1|APP|CCNB1|CDK1|FABP1|HIF1A|HRH1|INSR|NOS2|PFKFB3|PPARA|PPARD|PPARG|PTAFR|PTGS2|PTPN2|SRC|NR1H2|NR1H3	-12
GO Biological Processes	GO:1902803	regulation of synaptic vesicle transport	-14	15	14	24367	86	306	16	5.2	1.3	135|136|148|1020|1129|1137|1138|1141|1142|1268|1812|1813|2932|3351|8973|23621	ADORA2A|ADORA2B|ADRA1A|CDK5|CHRM2|CHRNA4|CHRNA5|CHRNB2|CHRNB3|CNR1|DRD1|DRD2|GSK3B|HTR1B|CHRNA6|BACE1	-12
GO Biological Processes	GO:0045860	positive regulation of protein kinase activity	-14	5	11	24367	540	306	34	11	1.8	134|136|148|154|207|238|891|983|994|1020|1136|1139|1636|1813|1815|1956|2322|2915|3357|3643|3690|3717|5294|5319|5580|5585|5595|5747|5770|6714|6850|8654|8851|50507	ADORA1|ADORA2B|ADRA1A|ADRB2|AKT1|ALK|CCNB1|CDK1|CDC25B|CDK5|CHRNA3|CHRNA7|ACE|DRD2|DRD4|EGFR|FLT3|GRM5|HTR2B|INSR|ITGB3|JAK2|PIK3CG|PLA2G1B|PRKCD|PKN1|MAPK3|PTK2|PTPN1|SRC|SYK|PDE5A|CDK5R1|NOX4	-12
GO Biological Processes	GO:0051966	regulation of synaptic transmission, glutamatergic	-14	17	15	24367	72	306	15	4.9	1.2	134|135|1020|1268|1812|1813|1814|1956|2912|2913|2915|2916|2918|3351|5743	ADORA1|ADORA2A|CDK5|CNR1|DRD1|DRD2|DRD3|EGFR|GRM2|GRM3|GRM5|GRM6|GRM8|HTR1B|PTGS2	-12
GO Biological Processes	GO:1901617	organic hydroxy compound biosynthetic process	-14	7.2	12	24367	275	306	25	8.2	1.6	231|239|246|1080|1109|1588|1595|1717|2222|2539|2629|3156|3269|3293|5724|6319|6531|6713|6716|6721|7299|7421|8644|29881|51478	AKR1B1|ALOX12|ALOX15|CFTR|AKR1C4|CYP19A1|CYP51A1|DHCR7|FDFT1|G6PD|GBA|HMGCR|HRH1|HSD17B3|PTAFR|SCD|SLC6A3|SQLE|SRD5A2|SREBF2|TYR|VDR|AKR1C3|NPC1L1|HSD17B7	-12
GO Biological Processes	GO:0016137	glycoside metabolic process	-14	40	20	24367	20	306	10	3.3	1	231|1109|1645|1646|2517|2629|8644|10327|57016|57704	AKR1B1|AKR1C4|AKR1C1|AKR1C2|FUCA1|GBA|AKR1C3|AKR1A1|AKR1B10|GBA2	-12
GO Biological Processes	GO:0048771	tissue remodeling	-14	9.2	13	24367	181	306	21	6.9	1.4	154|383|558|760|952|1513|1636|1956|3091|3351|3558|3690|4313|5340|5578|6093|6714|6850|7421|9475|50507	ADRB2|ARG1|AXL|CA2|CD38|CTSK|ACE|EGFR|HIF1A|HTR1B|IL2|ITGB3|MMP2|PLG|PRKCA|ROCK1|SRC|SYK|VDR|ROCK2|NOX4	-12
GO Biological Processes	GO:1902652	secondary alcohol metabolic process	-14	10	13	24367	160	306	20	6.5	1.4	351|949|1080|1565|1595|1717|2053|2222|2539|2629|3156|5467|6319|6646|6713|6721|8435|29881|51478|57704	APP|SCARB1|CFTR|CYP2D6|CYP51A1|DHCR7|EPHX2|FDFT1|G6PD|GBA|HMGCR|PPARD|SCD|SOAT1|SQLE|SREBF2|SOAT2|NPC1L1|HSD17B7|GBA2	-12
GO Biological Processes	GO:0002237	response to molecule of bacterial origin	-14	6.2	11	24367	358	306	28	9.2	1.6	207|383|558|949|1234|1268|1269|3066|3717|3965|4353|4843|5467|5578|5595|5724|5731|5732|5734|5743|5972|6714|7376|7421|8856|9536|9970|10062	AKT1|ARG1|AXL|SCARB1|CCR5|CNR1|CNR2|HDAC2|JAK2|LGALS9|MPO|NOS2|PPARD|PRKCA|MAPK3|PTAFR|PTGER1|PTGER2|PTGER4|PTGS2|REN|SRC|NR1H2|VDR|NR1I2|PTGES|NR1I3|NR1H3	-12
GO Biological Processes	GO:0016042	lipid catabolic process	-14	6.5	11	24367	331	306	27	8.8	1.6	134|207|949|1268|1545|1588|2166|2167|2168|2170|2171|2517|2629|3290|5294|5319|5322|5465|5467|5580|6715|8399|8644|27163|57016|57704|391013	ADORA1|AKT1|SCARB1|CNR1|CYP1B1|CYP19A1|FAAH|FABP4|FABP1|FABP3|FABP5|FUCA1|GBA|HSD11B1|PIK3CG|PLA2G1B|PLA2G5|PPARA|PPARD|PRKCD|SRD5A1|PLA2G10|AKR1C3|NAAA|AKR1B10|GBA2|PLA2G2C	-12
GO Biological Processes	GO:0002790	peptide secretion	-14	4.5	10	24367	649	306	37	12	1.9	43|134|135|952|1080|1268|1394|1595|1803|1813|1814|1815|1956|2864|3091|3156|3357|3358|3558|3717|3741|3965|4317|4321|4843|5319|5467|5578|5595|5734|5950|6714|6850|7376|7442|10062|27159	ACHE|ADORA1|ADORA2A|CD38|CFTR|CNR1|CRHR1|CYP51A1|DPP4|DRD2|DRD3|DRD4|EGFR|FFAR1|HIF1A|HMGCR|HTR2B|HTR2C|IL2|JAK2|KCNA5|LGALS9|MMP8|MMP12|NOS2|PLA2G1B|PPARD|PRKCA|MAPK3|PTGER4|RBP4|SRC|SYK|NR1H2|TRPV1|NR1H3|CHIA	-12
GO Biological Processes	GO:0007204	positive regulation of cytosolic calcium ion concentration	-14	6.5	11	24367	332	306	27	8.8	1.6	148|952|1020|1234|1268|1812|1813|1814|2099|2147|2859|2864|3357|3358|3558|3577|3717|5294|5319|5731|5732|5734|5777|6869|7442|8989|59340	ADRA1A|CD38|CDK5|CCR5|CNR1|DRD1|DRD2|DRD3|ESR1|F2|GPR35|FFAR1|HTR2B|HTR2C|IL2|CXCR1|JAK2|PIK3CG|PLA2G1B|PTGER1|PTGER2|PTGER4|PTPN6|TACR1|TRPV1|TRPA1|HRH4	-12
GO Biological Processes	GO:0019221	cytokine-mediated signaling pathway	-14	4.1	10	24367	796	306	41	13	1.9	207|240|246|383|558|759|816|1234|2322|2859|3091|3558|3577|3716|3717|3718|4128|4170|4312|4313|4314|4318|4321|4843|5292|5295|5468|5580|5595|5724|5743|5770|5771|5777|6095|6097|6850|7297|7357|7376|10062	AKT1|ALOX5|ALOX15|ARG1|AXL|CA1|CAMK2B|CCR5|FLT3|GPR35|HIF1A|IL2|CXCR1|JAK1|JAK2|JAK3|MAOA|MCL1|MMP1|MMP2|MMP3|MMP9|MMP12|NOS2|PIM1|PIK3R1|PPARG|PRKCD|MAPK3|PTAFR|PTGS2|PTPN1|PTPN2|PTPN6|RORA|RORC|SYK|TYK2|UGCG|NR1H2|NR1H3	-12
GO Biological Processes	GO:1903831	signal transduction involved in cellular response to ammonium ion	-14	31	18	24367	28	306	11	3.6	1.1	1128|1129|1131|1132|1133|1136|1137|1139|1141|8851|59340	CHRM1|CHRM2|CHRM3|CHRM4|CHRM5|CHRNA3|CHRNA4|CHRNA7|CHRNB2|CDK5R1|HRH4	-12
GO Biological Processes	GO:0008209	androgen metabolic process	-14	31	18	24367	28	306	11	3.6	1.1	949|1109|1586|1588|2099|3283|3293|6469|6715|6716|7364	SCARB1|AKR1C4|CYP17A1|CYP19A1|ESR1|HSD3B1|HSD17B3|SHH|SRD5A1|SRD5A2|UGT2B7	-12
GO Biological Processes	GO:0095500	acetylcholine receptor signaling pathway	-14	31	18	24367	28	306	11	3.6	1.1	1128|1129|1131|1132|1133|1136|1137|1139|1141|8851|59340	CHRM1|CHRM2|CHRM3|CHRM4|CHRM5|CHRNA3|CHRNA4|CHRNA7|CHRNB2|CDK5R1|HRH4	-12
GO Biological Processes	GO:0009611	response to wounding	-14	4.4	10	24367	691	306	38	12	1.9	135|140|239|246|383|558|891|949|983|1020|1813|1956|2147|3066|3091|3156|3674|3690|3717|3776|4321|4638|5294|5295|5340|5465|5467|5578|5580|5595|5747|5777|5792|5802|6469|6714|6850|23173	ADORA2A|ADORA3|ALOX12|ALOX15|ARG1|AXL|CCNB1|SCARB1|CDK1|CDK5|DRD2|EGFR|F2|HDAC2|HIF1A|HMGCR|ITGA2B|ITGB3|JAK2|KCNK2|MMP12|MYLK|PIK3CG|PIK3R1|PLG|PPARA|PPARD|PRKCA|PRKCD|MAPK3|PTK2|PTPN6|PTPRF|PTPRS|SHH|SRC|SYK|METAP1	-12
GO Biological Processes	GO:0071900	regulation of protein serine/threonine kinase activity	-13	5	10	24367	528	306	33	11	1.8	134|136|154|207|238|891|983|993|1139|1815|1956|2322|2629|3156|3357|3480|3643|3717|5294|5319|5347|5580|5585|5595|5770|5777|6714|6850|8654|8851|9133|50507|85417	ADORA1|ADORA2B|ADRB2|AKT1|ALK|CCNB1|CDK1|CDC25A|CHRNA7|DRD4|EGFR|FLT3|GBA|HMGCR|HTR2B|IGF1R|INSR|JAK2|PIK3CG|PLA2G1B|PLK1|PRKCD|PKN1|MAPK3|PTPN1|PTPN6|SRC|SYK|PDE5A|CDK5R1|CCNB2|NOX4|CCNB3	-11
GO Biological Processes	GO:0060135	maternal process involved in female pregnancy	-13	17	15	24367	64	306	14	4.6	1.2	207|231|367|383|1268|1508|2099|3965|4316|5241|5467|5595|5743|7421	AKT1|AKR1B1|AR|ARG1|CNR1|CTSB|ESR1|LGALS9|MMP7|PGR|PPARD|MAPK3|PTGS2|VDR	-11
GO Biological Processes	GO:1901655	cellular response to ketone	-13	13	14	24367	95	306	16	5.2	1.3	196|207|231|367|383|1080|1646|1956|2908|5468|5732|5734|6714|6715|8644|9475	AHR|AKT1|AKR1B1|AR|ARG1|CFTR|AKR1C2|EGFR|NR3C1|PPARG|PTGER2|PTGER4|SRC|SRD5A1|AKR1C3|ROCK2	-11
GO Biological Processes	GO:0042752	regulation of circadian rhythm	-13	12	13	24367	115	306	17	5.6	1.3	134|135|983|1141|1813|1814|1815|2932|5465|5468|5601|6095|6097|7153|8841|9475|10062	ADORA1|ADORA2A|CDK1|CHRNB2|DRD2|DRD3|DRD4|GSK3B|PPARA|PPARG|MAPK9|RORA|RORC|TOP2A|HDAC3|ROCK2|NR1H3	-11
GO Biological Processes	GO:0001963	synaptic transmission, dopaminergic	-13	27	17	24367	32	306	11	3.6	1.1	135|1020|1141|1812|1813|1814|1815|5743|6530|6531|6532	ADORA2A|CDK5|CHRNB2|DRD1|DRD2|DRD3|DRD4|PTGS2|SLC6A2|SLC6A3|SLC6A4	-11
GO Biological Processes	GO:0001666	response to hypoxia	-13	6	11	24367	358	306	27	8.8	1.6	134|207|768|891|952|1137|1139|1141|1803|1813|2030|2168|3091|3291|3741|3776|4313|4843|5465|5467|5743|6095|6532|6714|7015|9475|50507	ADORA1|AKT1|CA9|CCNB1|CD38|CHRNA4|CHRNA7|CHRNB2|DPP4|DRD2|SLC29A1|FABP1|HIF1A|HSD11B2|KCNA5|KCNK2|MMP2|NOS2|PPARA|PPARD|PTGS2|RORA|SLC6A4|SRC|TERT|ROCK2|NOX4	-11
GO Biological Processes	GO:0006936	muscle contraction	-13	6	11	24367	359	306	27	8.8	1.6	134|136|148|154|952|1129|1131|1136|1141|1143|1812|1813|2741|3352|3357|3741|3757|4638|5294|5724|5743|6093|6331|6869|7442|8654|9475	ADORA1|ADORA2B|ADRA1A|ADRB2|CD38|CHRM2|CHRM3|CHRNA3|CHRNB2|CHRNB4|DRD1|DRD2|GLRA1|HTR1D|HTR2B|KCNA5|KCNH2|MYLK|PIK3CG|PTAFR|PTGS2|ROCK1|SCN5A|TACR1|TRPV1|PDE5A|ROCK2	-11
GO Biological Processes	GO:0015701	bicarbonate transport	-13	22	16	24367	43	306	12	3.9	1.1	759|760|761|762|763|765|766|768|771|1080|23632|377677	CA1|CA2|CA3|CA4|CA5A|CA6|CA7|CA9|CA12|CFTR|CA14|CA13	-11
GO Biological Processes	GO:0015909	long-chain fatty acid transport	-13	16	14	24367	69	306	14	4.6	1.2	207|1636|1813|1814|1815|2167|2168|2170|5319|5322|5468|6850|8399|391013	AKT1|ACE|DRD2|DRD3|DRD4|FABP4|FABP1|FABP3|PLA2G1B|PLA2G5|PPARG|SYK|PLA2G10|PLA2G2C	-11
GO Biological Processes	GO:1903305	regulation of regulated secretory pathway	-13	9.3	12	24367	162	306	19	6.2	1.4	135|136|148|1020|1129|1137|1138|1141|1142|1268|1812|1813|2932|3351|3965|5724|6850|8973|23621	ADORA2A|ADORA2B|ADRA1A|CDK5|CHRM2|CHRNA4|CHRNA5|CHRNB2|CHRNB3|CNR1|DRD1|DRD2|GSK3B|HTR1B|LGALS9|PTAFR|SYK|CHRNA6|BACE1	-11
GO Biological Processes	GO:0036293	response to decreased oxygen levels	-13	5.8	11	24367	370	306	27	8.8	1.6	134|207|768|891|952|1137|1139|1141|1803|1813|2030|2168|3091|3291|3741|3776|4313|4843|5465|5467|5743|6095|6532|6714|7015|9475|50507	ADORA1|AKT1|CA9|CCNB1|CD38|CHRNA4|CHRNA7|CHRNB2|DPP4|DRD2|SLC29A1|FABP1|HIF1A|HSD11B2|KCNA5|KCNK2|MMP2|NOS2|PPARA|PPARD|PTGS2|RORA|SLC6A4|SRC|TERT|ROCK2|NOX4	-11
GO Biological Processes	GO:0072593	reactive oxygen species metabolic process	-13	6.7	11	24367	286	306	24	7.8	1.5	207|239|1545|1956|2147|2539|3091|3643|3717|4137|4314|4317|4353|4843|5580|5743|6095|6850|7442|7498|8644|9475|10013|50507	AKT1|ALOX12|CYP1B1|EGFR|F2|G6PD|HIF1A|INSR|JAK2|MAPT|MMP3|MMP8|MPO|NOS2|PRKCD|PTGS2|RORA|SYK|TRPV1|XDH|AKR1C3|ROCK2|HDAC6|NOX4	-11
GO Biological Processes	GO:0015893	drug transport	-13	8	11	24367	210	306	21	6.9	1.4	135|383|760|1133|1136|1137|1141|1268|1812|1813|1814|1815|3351|4363|5243|6530|6531|6536|6582|8973|9429	ADORA2A|ARG1|CA2|CHRM5|CHRNA3|CHRNA4|CHRNB2|CNR1|DRD1|DRD2|DRD3|DRD4|HTR1B|ABCC1|ABCB1|SLC6A2|SLC6A3|SLC6A9|SLC22A2|CHRNA6|ABCG2	-11
GO Biological Processes	GO:0007568	aging	-12	6.2	11	24367	319	306	25	8.2	1.6	148|207|239|328|351|383|983|1021|1075|1268|2915|3156|4311|4316|4353|5423|5580|5595|5743|6531|7015|9212|9891|10783|50507	ADRA1A|AKT1|ALOX12|APEX1|APP|ARG1|CDK1|CDK6|CTSC|CNR1|GRM5|HMGCR|MME|MMP7|MPO|POLB|PRKCD|MAPK3|PTGS2|SLC6A3|TERT|AURKB|NUAK1|NEK6|NOX4	-10
GO Biological Processes	GO:0099003	vesicle-mediated transport in synapse	-12	7.8	11	24367	214	306	21	6.9	1.4	135|136|148|1020|1129|1137|1138|1141|1142|1268|1759|1812|1813|1814|1815|2932|3351|3690|6093|8973|23621	ADORA2A|ADORA2B|ADRA1A|CDK5|CHRM2|CHRNA4|CHRNA5|CHRNB2|CHRNB3|CNR1|DNM1|DRD1|DRD2|DRD3|DRD4|GSK3B|HTR1B|ITGB3|ROCK1|CHRNA6|BACE1	-10
GO Biological Processes	GO:0030574	collagen catabolic process	-12	20	15	24367	47	306	12	3.9	1.1	1508|1509|1513|1514|4312|4313|4314|4316|4317|4318|4321|4322	CTSB|CTSD|CTSK|CTSL|MMP1|MMP2|MMP3|MMP7|MMP8|MMP9|MMP12|MMP13	-10
GO Biological Processes	GO:0046717	acid secretion	-12	11	12	24367	127	306	17	5.6	1.3	134|135|1133|1636|1813|1814|1815|2912|3351|4843|5319|5322|6536|6850|7442|8399|391013	ADORA1|ADORA2A|CHRM5|ACE|DRD2|DRD3|DRD4|GRM2|HTR1B|NOS2|PLA2G1B|PLA2G5|SLC6A9|SYK|TRPV1|PLA2G10|PLA2G2C	-10
GO Biological Processes	GO:0045834	positive regulation of lipid metabolic process	-12	9.7	12	24367	148	306	18	5.9	1.3	134|207|949|2147|2168|2170|2322|3357|3358|5465|5467|5468|5580|5743|5747|6714|7376|10062	ADORA1|AKT1|SCARB1|F2|FABP1|FABP3|FLT3|HTR2B|HTR2C|PPARA|PPARD|PPARG|PRKCD|PTGS2|PTK2|SRC|NR1H2|NR1H3	-10
GO Biological Processes	GO:0002793	positive regulation of peptide secretion	-12	6.5	11	24367	295	306	24	7.8	1.5	43|134|135|952|1080|1813|1956|2864|3091|3357|3558|3717|3965|4317|4321|5319|5467|5595|5734|5950|6714|6850|7376|27159	ACHE|ADORA1|ADORA2A|CD38|CFTR|DRD2|EGFR|FFAR1|HIF1A|HTR2B|IL2|JAK2|LGALS9|MMP8|MMP12|PLA2G1B|PPARD|MAPK3|PTGER4|RBP4|SRC|SYK|NR1H2|CHIA	-10
GO Biological Processes	GO:0045471	response to ethanol	-12	11	12	24367	128	306	17	5.6	1.3	761|983|1141|1268|1813|1814|1815|2539|2741|3066|3156|3351|3359|3558|5423|5950|6531	CA3|CDK1|CHRNB2|CNR1|DRD2|DRD3|DRD4|G6PD|GLRA1|HDAC2|HMGCR|HTR1B|HTR3A|IL2|POLB|RBP4|SLC6A3	-10
GO Biological Processes	GO:0006816	calcium ion transport	-12	5.2	10	24367	446	306	29	9.5	1.7	135|148|816|1020|1137|1139|1141|1234|1394|1812|1813|1814|1815|2147|2539|2859|2864|2916|3357|3358|3958|4638|5294|5319|5743|5777|7421|7442|8989	ADORA2A|ADRA1A|CAMK2B|CDK5|CHRNA4|CHRNA7|CHRNB2|CCR5|CRHR1|DRD1|DRD2|DRD3|DRD4|F2|G6PD|GPR35|FFAR1|GRM6|HTR2B|HTR2C|LGALS3|MYLK|PIK3CG|PLA2G1B|PTGS2|PTPN6|VDR|TRPV1|TRPA1	-10
GO Biological Processes	GO:0046883	regulation of hormone secretion	-12	6.8	11	24367	269	306	23	7.5	1.5	134|135|952|1080|1136|1268|1394|1588|1803|1813|1956|2864|3091|3156|3350|3358|3717|3741|4843|5467|5578|5950|5972	ADORA1|ADORA2A|CD38|CFTR|CHRNA3|CNR1|CRHR1|CYP19A1|DPP4|DRD2|EGFR|FFAR1|HIF1A|HMGCR|HTR1A|HTR2C|JAK2|KCNA5|NOS2|PPARD|PRKCA|RBP4|REN	-10
GO Biological Processes	GO:0002274	myeloid leukocyte activation	-12	4.2	9.5	24367	656	306	35	11	1.8	136|240|351|383|1075|1143|1268|1269|1508|1509|2171|2517|3577|3614|3717|3958|3965|4137|4311|4317|4318|4353|5294|5580|5724|5777|5836|6093|6095|6850|7276|7442|8399|10062|29952	ADORA2B|ALOX5|APP|ARG1|CTSC|CHRNB4|CNR1|CNR2|CTSB|CTSD|FABP5|FUCA1|CXCR1|IMPDH1|JAK2|LGALS3|LGALS9|MAPT|MME|MMP8|MMP9|MPO|PIK3CG|PRKCD|PTAFR|PTPN6|PYGL|ROCK1|RORA|SYK|TTR|TRPV1|PLA2G10|NR1H3|DPP7	-10
GO Biological Processes	GO:2000377	regulation of reactive oxygen species metabolic process	-12	8.1	11	24367	197	306	20	6.5	1.4	207|1545|1956|2147|2539|3091|3643|3717|4137|4314|4317|5580|5743|6850|7442|7498|8644|9475|10013|50507	AKT1|CYP1B1|EGFR|F2|G6PD|HIF1A|INSR|JAK2|MAPT|MMP3|MMP8|PRKCD|PTGS2|SYK|TRPV1|XDH|AKR1C3|ROCK2|HDAC6|NOX4	-10
GO Biological Processes	GO:1903522	regulation of blood circulation	-12	6.3	11	24367	301	306	24	7.8	1.5	134|140|148|207|554|952|1129|1131|1636|1813|1889|1956|3269|3558|3717|3741|3757|5294|5724|5732|5743|6331|7442|8654	ADORA1|ADORA3|ADRA1A|AKT1|AVPR2|CD38|CHRM2|CHRM3|ACE|DRD2|ECE1|EGFR|HRH1|IL2|JAK2|KCNA5|KCNH2|PIK3CG|PTAFR|PTGER2|PTGS2|SCN5A|TRPV1|PDE5A	-10
GO Biological Processes	GO:0042133	neurotransmitter metabolic process	-12	9.4	12	24367	152	306	18	5.9	1.3	43|207|590|1545|3350|3643|3717|4128|4317|4843|5743|6095|6531|6532|6582|6715|7442|9475	ACHE|AKT1|BCHE|CYP1B1|HTR1A|INSR|JAK2|MAOA|MMP8|NOS2|PTGS2|RORA|SLC6A3|SLC6A4|SLC22A2|SRD5A1|TRPV1|ROCK2	-10
GO Biological Processes	GO:0050714	positive regulation of protein secretion	-12	6.7	11	24367	274	306	23	7.5	1.5	43|135|952|1080|1813|1956|2864|3091|3357|3558|3717|3965|4317|4321|5319|5467|5595|5734|5950|6714|6850|7376|27159	ACHE|ADORA2A|CD38|CFTR|DRD2|EGFR|FFAR1|HIF1A|HTR2B|IL2|JAK2|LGALS9|MMP8|MMP12|PLA2G1B|PPARD|MAPK3|PTGER4|RBP4|SRC|SYK|NR1H2|CHIA	-10
GO Biological Processes	GO:0014074	response to purine-containing compound	-12	9.4	12	24367	153	306	18	5.9	1.3	135|196|328|351|1080|3066|5294|5322|5468|5724|5743|5972|6531|6532|6715|7299|7442|50507	ADORA2A|AHR|APEX1|APP|CFTR|HDAC2|PIK3CG|PLA2G5|PPARG|PTAFR|PTGS2|REN|SLC6A3|SLC6A4|SRD5A1|TYR|TRPV1|NOX4	-10
GO Biological Processes	GO:0017158	regulation of calcium ion-dependent exocytosis	-12	11	12	24367	113	306	16	5.2	1.3	135|136|148|1020|1129|1137|1138|1141|1142|1268|1812|1813|2932|3351|8973|23621	ADORA2A|ADORA2B|ADRA1A|CDK5|CHRM2|CHRNA4|CHRNA5|CHRNB2|CHRNB3|CNR1|DRD1|DRD2|GSK3B|HTR1B|CHRNA6|BACE1	-10
GO Biological Processes	GO:0044706	multi-multicellular organism process	-12	7.5	11	24367	224	306	21	6.9	1.4	207|231|367|383|952|1268|1394|1508|2099|3291|3965|4313|4316|4318|5241|5467|5595|5724|5743|6532|7421	AKT1|AKR1B1|AR|ARG1|CD38|CNR1|CRHR1|CTSB|ESR1|HSD11B2|LGALS9|MMP2|MMP7|MMP9|PGR|PPARD|MAPK3|PTAFR|PTGS2|SLC6A4|VDR	-10
GO Biological Processes	GO:0010038	response to metal ion	-12	5.7	10	24367	363	306	26	8.5	1.6	142|207|246|351|383|760|891|983|1813|1956|2167|2539|2741|3091|4137|4318|5595|5601|5743|6331|6469|6531|7015|8644|9536|23621	PARP1|AKT1|ALOX15|APP|ARG1|CA2|CCNB1|CDK1|DRD2|EGFR|FABP4|G6PD|GLRA1|HIF1A|MAPT|MMP9|MAPK3|MAPK9|PTGS2|SCN5A|SHH|SLC6A3|TERT|AKR1C3|PTGES|BACE1	-10
GO Biological Processes	GO:0050865	regulation of cell activation	-12	4.3	9.4	24367	632	306	34	11	1.8	135|136|196|207|239|383|558|952|1075|1141|1268|1269|1803|2147|3558|3717|3718|3958|3965|4317|5295|5578|5580|5585|5724|5771|5777|6095|6469|6714|6850|8399|8654|10062	ADORA2A|ADORA2B|AHR|AKT1|ALOX12|ARG1|AXL|CD38|CTSC|CHRNB2|CNR1|CNR2|DPP4|F2|IL2|JAK2|JAK3|LGALS3|LGALS9|MMP8|PIK3R1|PRKCA|PRKCD|PKN1|PTAFR|PTPN2|PTPN6|RORA|SHH|SRC|SYK|PLA2G10|PDE5A|NR1H3	-10
GO Biological Processes	GO:0044070	regulation of anion transport	-12	12	13	24367	97	306	15	4.9	1.2	134|135|207|383|760|766|1080|2170|2915|3351|5243|5580|5724|6850|8399	ADORA1|ADORA2A|AKT1|ARG1|CA2|CA7|CFTR|FABP3|GRM5|HTR1B|ABCB1|PRKCD|PTAFR|SYK|PLA2G10	-10
GO Biological Processes	GO:0051098	regulation of binding	-12	5.6	10	24367	370	306	26	8.5	1.6	142|154|207|351|1020|1565|1636|2932|3066|3717|4233|4317|4318|4751|5347|5465|5468|5580|5595|5792|6093|6714|7015|8658|9212|55869	PARP1|ADRB2|AKT1|APP|CDK5|CYP2D6|ACE|GSK3B|HDAC2|JAK2|MET|MMP8|MMP9|NEK2|PLK1|PPARA|PPARG|PRKCD|MAPK3|PTPRF|ROCK1|SRC|TERT|TNKS|AURKB|HDAC8	-9.9
GO Biological Processes	GO:0044598	doxorubicin metabolic process	-12	62	21	24367	9	306	7	2.3	0.85	231|1109|1645|1646|8644|10327|57016	AKR1B1|AKR1C4|AKR1C1|AKR1C2|AKR1C3|AKR1A1|AKR1B10	-9.9
GO Biological Processes	GO:0044597	daunorubicin metabolic process	-12	62	21	24367	9	306	7	2.3	0.85	231|1109|1645|1646|8644|10327|57016	AKR1B1|AKR1C4|AKR1C1|AKR1C2|AKR1C3|AKR1A1|AKR1B10	-9.9
GO Biological Processes	GO:0030638	polyketide metabolic process	-12	62	21	24367	9	306	7	2.3	0.85	231|1109|1645|1646|8644|10327|57016	AKR1B1|AKR1C4|AKR1C1|AKR1C2|AKR1C3|AKR1A1|AKR1B10	-9.9
GO Biological Processes	GO:0015872	dopamine transport	-12	18	14	24367	52	306	12	3.9	1.1	1133|1137|1141|1268|1812|1813|1814|1815|3351|6530|6531|8973	CHRM5|CHRNA4|CHRNB2|CNR1|DRD1|DRD2|DRD3|DRD4|HTR1B|SLC6A2|SLC6A3|CHRNA6	-9.9
GO Biological Processes	GO:0016572	histone phosphorylation	-12	22	15	24367	40	306	11	3.6	1.1	891|983|1017|1020|1812|3717|5578|5580|5585|5595|9212	CCNB1|CDK1|CDK2|CDK5|DRD1|JAK2|PRKCA|PRKCD|PKN1|MAPK3|AURKB	-9.9
GO Biological Processes	GO:0042632	cholesterol homeostasis	-12	12	12	24367	99	306	15	4.9	1.2	949|1645|2053|2167|2170|6095|6646|6721|7376|7421|8399|8435|8856|9970|10062	SCARB1|AKR1C1|EPHX2|FABP4|FABP3|RORA|SOAT1|SREBF2|NR1H2|VDR|PLA2G10|SOAT2|NR1I2|NR1I3|NR1H3	-9.9
GO Biological Processes	GO:0090257	regulation of muscle system process	-12	6.8	11	24367	257	306	22	7.2	1.5	134|136|142|148|154|816|1129|1131|1136|1143|2539|5294|5465|5578|5724|5743|5747|6093|6331|6869|8654|9475	ADORA1|ADORA2B|PARP1|ADRA1A|ADRB2|CAMK2B|CHRM2|CHRM3|CHRNA3|CHRNB4|G6PD|PIK3CG|PPARA|PRKCA|PTAFR|PTGS2|PTK2|ROCK1|SCN5A|TACR1|PDE5A|ROCK2	-9.8
GO Biological Processes	GO:1905952	regulation of lipid localization	-12	9	11	24367	160	306	18	5.9	1.3	207|949|1394|1588|2170|3690|5465|5467|5468|5580|5771|5972|6469|6721|6850|7376|8399|10062	AKT1|SCARB1|CRHR1|CYP19A1|FABP3|ITGB3|PPARA|PPARD|PPARG|PRKCD|PTPN2|REN|SHH|SREBF2|SYK|NR1H2|PLA2G10|NR1H3	-9.8
GO Biological Processes	GO:0060249	anatomical structure homeostasis	-12	5.1	9.8	24367	437	306	28	9.2	1.6	134|142|154|231|328|760|952|1020|1268|1513|1956|3091|3351|3690|4751|5340|5578|5595|5950|6530|6714|6850|7015|8658|9212|50507|55869|80351	ADORA1|PARP1|ADRB2|AKR1B1|APEX1|CA2|CD38|CDK5|CNR1|CTSK|EGFR|HIF1A|HTR1B|ITGB3|NEK2|PLG|PRKCA|MAPK3|RBP4|SLC6A2|SRC|SYK|TERT|TNKS|AURKB|NOX4|HDAC8|TNKS2	-9.8
GO Biological Processes	GO:0055092	sterol homeostasis	-12	12	12	24367	100	306	15	4.9	1.2	949|1645|2053|2167|2170|6095|6646|6721|7376|7421|8399|8435|8856|9970|10062	SCARB1|AKR1C1|EPHX2|FABP4|FABP3|RORA|SOAT1|SREBF2|NR1H2|VDR|PLA2G10|SOAT2|NR1I2|NR1I3|NR1H3	-9.8
GO Biological Processes	GO:0043405	regulation of MAP kinase activity	-12	5.8	10	24367	344	306	25	8.2	1.6	134|136|238|983|1139|1815|1956|2322|2629|3156|3357|3480|3643|3717|5294|5319|5580|5585|5595|5770|5777|6714|6850|8654|50507	ADORA1|ADORA2B|ALK|CDK1|CHRNA7|DRD4|EGFR|FLT3|GBA|HMGCR|HTR2B|IGF1R|INSR|JAK2|PIK3CG|PLA2G1B|PRKCD|PKN1|MAPK3|PTPN1|PTPN6|SRC|SYK|PDE5A|NOX4	-9.8
GO Biological Processes	GO:0048608	reproductive structure development	-12	5.1	9.7	24367	439	306	28	9.2	1.6	207|367|558|1508|1588|1956|2099|3091|3293|3294|3643|4311|5241|5340|5467|5468|5595|5743|5747|5777|5950|5972|6469|6714|6715|6716|7421|8644	AKT1|AR|AXL|CTSB|CYP19A1|EGFR|ESR1|HIF1A|HSD17B3|HSD17B2|INSR|MME|PGR|PLG|PPARD|PPARG|MAPK3|PTGS2|PTK2|PTPN6|RBP4|REN|SHH|SRC|SRD5A1|SRD5A2|VDR|AKR1C3	-9.8
GO Biological Processes	GO:0032102	negative regulation of response to external stimulus	-12	5.5	9.9	24367	376	306	26	8.5	1.6	134|135|239|240|1269|1588|1803|1812|1813|1814|2147|2629|3156|3558|5340|5465|5467|5468|5580|5734|5771|5802|6095|6531|10062|23621	ADORA1|ADORA2A|ALOX12|ALOX5|CNR2|CYP19A1|DPP4|DRD1|DRD2|DRD3|F2|GBA|HMGCR|IL2|PLG|PPARA|PPARD|PPARG|PRKCD|PTGER4|PTPN2|PTPRS|RORA|SLC6A3|NR1H3|BACE1	-9.8
GO Biological Processes	GO:0006720	isoprenoid metabolic process	-12	9.7	12	24367	140	306	17	5.6	1.3	124|126|231|1109|1545|1557|1565|1645|1956|2222|3156|5467|5950|6715|7276|8644|57016	ADH1A|ADH1C|AKR1B1|AKR1C4|CYP1B1|CYP2C19|CYP2D6|AKR1C1|EGFR|FDFT1|HMGCR|PPARD|RBP4|SRD5A1|TTR|AKR1C3|AKR1B10	-9.7
GO Biological Processes	GO:0006721	terpenoid metabolic process	-12	11	12	24367	120	306	16	5.2	1.3	124|126|231|1109|1545|1557|1565|1645|1956|2222|5467|5950|6715|7276|8644|57016	ADH1A|ADH1C|AKR1B1|AKR1C4|CYP1B1|CYP2C19|CYP2D6|AKR1C1|EGFR|FDFT1|PPARD|RBP4|SRD5A1|TTR|AKR1C3|AKR1B10	-9.7
GO Biological Processes	GO:0016079	synaptic vesicle exocytosis	-12	11	12	24367	120	306	16	5.2	1.3	135|136|148|1020|1129|1137|1138|1141|1142|1268|1812|1813|2932|3351|8973|23621	ADORA2A|ADORA2B|ADRA1A|CDK5|CHRM2|CHRNA4|CHRNA5|CHRNB2|CHRNB3|CNR1|DRD1|DRD2|GSK3B|HTR1B|CHRNA6|BACE1	-9.7
GO Biological Processes	GO:0009306	protein secretion	-12	4.3	9.3	24367	614	306	33	11	1.8	43|135|952|1080|1268|1595|1803|1813|1814|1815|1956|2864|3091|3156|3357|3558|3717|3741|3965|4317|4321|4843|5319|5467|5578|5595|5734|5950|6714|6850|7376|10062|27159	ACHE|ADORA2A|CD38|CFTR|CNR1|CYP51A1|DPP4|DRD2|DRD3|DRD4|EGFR|FFAR1|HIF1A|HMGCR|HTR2B|IL2|JAK2|KCNA5|LGALS9|MMP8|MMP12|NOS2|PLA2G1B|PPARD|PRKCA|MAPK3|PTGER4|RBP4|SRC|SYK|NR1H2|NR1H3|CHIA	-9.7
GO Biological Processes	GO:0050727	regulation of inflammatory response	-12	4.7	9.5	24367	508	306	30	9.8	1.7	134|135|136|240|1075|1268|1269|1588|1956|2099|2147|2167|2629|3558|3717|4314|4317|4318|4363|4843|5294|5465|5467|5468|5580|5734|5743|5771|6095|10062	ADORA1|ADORA2A|ADORA2B|ALOX5|CTSC|CNR1|CNR2|CYP19A1|EGFR|ESR1|F2|FABP4|GBA|IL2|JAK2|MMP3|MMP8|MMP9|ABCC1|NOS2|PIK3CG|PPARA|PPARD|PPARG|PRKCD|PTGER4|PTGS2|PTPN2|RORA|NR1H3	-9.7
GO Biological Processes	GO:0046777	protein autophosphorylation	-12	7.1	11	24367	235	306	21	6.9	1.4	207|238|816|1020|1612|1636|1956|2322|2932|3480|3643|3717|3791|4751|5292|5595|5747|6714|6850|9212|10783	AKT1|ALK|CAMK2B|CDK5|DAPK1|ACE|EGFR|FLT3|GSK3B|IGF1R|INSR|JAK2|KDR|NEK2|PIM1|MAPK3|PTK2|SRC|SYK|AURKB|NEK6	-9.7
GO Biological Processes	GO:0009617	response to bacterium	-12	3.9	9.1	24367	729	306	36	12	1.8	207|383|558|761|949|1234|1268|1269|2147|2167|3066|3717|3965|4353|4843|5225|5319|5467|5578|5580|5595|5724|5731|5732|5734|5743|5836|5972|6714|6850|7376|7421|8856|9536|9970|10062	AKT1|ARG1|AXL|CA3|SCARB1|CCR5|CNR1|CNR2|F2|FABP4|HDAC2|JAK2|LGALS9|MPO|NOS2|PGC|PLA2G1B|PPARD|PRKCA|PRKCD|MAPK3|PTAFR|PTGER1|PTGER2|PTGER4|PTGS2|PYGL|REN|SRC|SYK|NR1H2|VDR|NR1I2|PTGES|NR1I3|NR1H3	-9.7
GO Biological Processes	GO:0043434	response to peptide hormone	-12	5	9.7	24367	443	306	28	9.2	1.6	142|207|328|383|760|1394|2101|2170|2932|3291|3480|3643|3717|3718|5295|5319|5465|5468|5580|5743|5747|5770|5771|6093|6714|6715|7442|9475	PARP1|AKT1|APEX1|ARG1|CA2|CRHR1|ESRRA|FABP3|GSK3B|HSD11B2|IGF1R|INSR|JAK2|JAK3|PIK3R1|PLA2G1B|PPARA|PPARG|PRKCD|PTGS2|PTK2|PTPN1|PTPN2|ROCK1|SRC|SRD5A1|TRPV1|ROCK2	-9.7
GO Biological Processes	GO:0061458	reproductive system development	-12	5	9.7	24367	443	306	28	9.2	1.6	207|367|558|1508|1588|1956|2099|3091|3293|3294|3643|4311|5241|5340|5467|5468|5595|5743|5747|5777|5950|5972|6469|6714|6715|6716|7421|8644	AKT1|AR|AXL|CTSB|CYP19A1|EGFR|ESR1|HIF1A|HSD17B3|HSD17B2|INSR|MME|PGR|PLG|PPARD|PPARG|MAPK3|PTGS2|PTK2|PTPN6|RBP4|REN|SHH|SRC|SRD5A1|SRD5A2|VDR|AKR1C3	-9.7
GO Biological Processes	GO:0050806	positive regulation of synaptic transmission	-12	8.7	11	24367	164	306	18	5.9	1.3	134|135|148|154|351|760|766|1020|1139|1141|1268|1812|1813|1815|1956|2932|4311|5743	ADORA1|ADORA2A|ADRA1A|ADRB2|APP|CA2|CA7|CDK5|CHRNA7|CHRNB2|CNR1|DRD1|DRD2|DRD4|EGFR|GSK3B|MME|PTGS2	-9.7
GO Biological Processes	GO:0019932	second-messenger-mediated signaling	-12	5	9.6	24367	445	306	28	9.2	1.6	135|136|148|154|196|1234|1394|1812|1813|1814|1956|2915|2932|3269|3357|3358|3577|3791|4137|4843|5578|5731|5732|5734|6850|8654|10846|50940	ADORA2A|ADORA2B|ADRA1A|ADRB2|AHR|CCR5|CRHR1|DRD1|DRD2|DRD3|EGFR|GRM5|GSK3B|HRH1|HTR2B|HTR2C|CXCR1|KDR|MAPT|NOS2|PRKCA|PTGER1|PTGER2|PTGER4|SYK|PDE5A|PDE10A|PDE11A	-9.6
GO Biological Processes	GO:0009914	hormone transport	-11	5.9	10	24367	324	306	24	7.8	1.5	134|135|952|1080|1136|1268|1394|1588|1803|1813|1956|2864|3091|3156|3350|3358|3717|3741|4843|5467|5578|5950|5972|7276	ADORA1|ADORA2A|CD38|CFTR|CHRNA3|CNR1|CRHR1|CYP19A1|DPP4|DRD2|EGFR|FFAR1|HIF1A|HMGCR|HTR1A|HTR2C|JAK2|KCNA5|NOS2|PPARD|PRKCA|RBP4|REN|TTR	-9.5
GO Biological Processes	GO:0010942	positive regulation of cell death	-11	3.9	9	24367	739	306	36	12	1.8	134|135|142|207|239|1020|1075|1268|1509|1545|1612|2932|3156|3717|3776|3965|4137|4170|4314|4318|5468|5580|5601|5743|5771|6714|6850|7153|7421|7442|7498|8644|8851|10013|23621|50507	ADORA1|ADORA2A|PARP1|AKT1|ALOX12|CDK5|CTSC|CNR1|CTSD|CYP1B1|DAPK1|GSK3B|HMGCR|JAK2|KCNK2|LGALS9|MAPT|MCL1|MMP3|MMP9|PPARG|PRKCD|MAPK9|PTGS2|PTPN2|SRC|SYK|TOP2A|VDR|TRPV1|XDH|AKR1C3|CDK5R1|HDAC6|BACE1|NOX4	-9.5
GO Biological Processes	GO:0046456	icosanoid biosynthetic process	-11	17	14	24367	56	306	12	3.9	1.1	239|240|246|2171|5319|5322|5742|5743|6850|6916|8644|9536	ALOX12|ALOX5|ALOX15|FABP5|PLA2G1B|PLA2G5|PTGS1|PTGS2|SYK|TBXAS1|AKR1C3|PTGES	-9.5
GO Biological Processes	GO:0035249	synaptic transmission, glutamatergic	-11	11	12	24367	105	306	15	4.9	1.2	134|135|1020|1268|1812|1813|1814|1956|2912|2913|2915|2916|2918|3351|5743	ADORA1|ADORA2A|CDK5|CNR1|DRD1|DRD2|DRD3|EGFR|GRM2|GRM3|GRM5|GRM6|GRM8|HTR1B|PTGS2	-9.5
GO Biological Processes	GO:0006367	transcription initiation from RNA polymerase II promoter	-11	7.9	11	24367	191	306	19	6.2	1.4	367|891|983|2099|2100|2101|2908|4306|5241|5465|5467|5468|6095|6097|7376|7421|8856|9970|10062	AR|CCNB1|CDK1|ESR1|ESR2|ESRRA|NR3C1|NR3C2|PGR|PPARA|PPARD|PPARG|RORA|RORC|NR1H2|VDR|NR1I2|NR1I3|NR1H3	-9.5
GO Biological Processes	GO:0050890	cognition	-11	6.2	10	24367	297	306	23	7.5	1.5	134|351|590|1020|1128|1137|1139|1141|1268|1812|1813|1814|1956|2915|3091|3156|3269|3643|3776|4137|4311|5743|6532	ADORA1|APP|BCHE|CDK5|CHRM1|CHRNA4|CHRNA7|CHRNB2|CNR1|DRD1|DRD2|DRD3|EGFR|GRM5|HIF1A|HMGCR|HRH1|INSR|KCNK2|MAPT|MME|PTGS2|SLC6A4	-9.5
GO Biological Processes	GO:0030647	aminoglycoside antibiotic metabolic process	-11	56	20	24367	10	306	7	2.3	0.85	231|1109|1645|1646|8644|10327|57016	AKR1B1|AKR1C4|AKR1C1|AKR1C2|AKR1C3|AKR1A1|AKR1B10	-9.4
GO Biological Processes	GO:0007565	female pregnancy	-11	7.8	11	24367	194	306	19	6.2	1.4	207|231|367|383|952|1268|1394|1508|2099|3291|3965|4313|4316|4318|5241|5467|5595|5743|7421	AKT1|AKR1B1|AR|ARG1|CD38|CNR1|CRHR1|CTSB|ESR1|HSD11B2|LGALS9|MMP2|MMP7|MMP9|PGR|PPARD|MAPK3|PTGS2|VDR	-9.4
GO Biological Processes	GO:0034308	primary alcohol metabolic process	-11	12	12	24367	90	306	14	4.6	1.2	124|126|231|1109|1545|1565|1645|1646|5950|7276|8644|10327|27163|57016	ADH1A|ADH1C|AKR1B1|AKR1C4|CYP1B1|CYP2D6|AKR1C1|AKR1C2|RBP4|TTR|AKR1C3|AKR1A1|NAAA|AKR1B10	-9.3
GO Biological Processes	GO:0070838	divalent metal ion transport	-11	4.7	9.3	24367	495	306	29	9.5	1.7	135|148|816|1020|1137|1139|1141|1234|1394|1812|1813|1814|1815|2147|2539|2859|2864|2916|3357|3358|3958|4638|5294|5319|5743|5777|7421|7442|8989	ADORA2A|ADRA1A|CAMK2B|CDK5|CHRNA4|CHRNA7|CHRNB2|CCR5|CRHR1|DRD1|DRD2|DRD3|DRD4|F2|G6PD|GPR35|FFAR1|GRM6|HTR2B|HTR2C|LGALS3|MYLK|PIK3CG|PLA2G1B|PTGS2|PTPN6|VDR|TRPV1|TRPA1	-9.3
GO Biological Processes	GO:0017157	regulation of exocytosis	-11	7.2	10	24367	222	306	20	6.5	1.4	135|136|148|1020|1080|1129|1137|1138|1141|1142|1268|1812|1813|2932|3351|3965|5724|6850|8973|23621	ADORA2A|ADORA2B|ADRA1A|CDK5|CFTR|CHRM2|CHRNA4|CHRNA5|CHRNB2|CHRNB3|CNR1|DRD1|DRD2|GSK3B|HTR1B|LGALS9|PTAFR|SYK|CHRNA6|BACE1	-9.3
GO Biological Processes	GO:0043279	response to alkaloid	-11	11	12	24367	109	306	15	4.9	1.2	135|590|1020|1141|1268|1812|1813|1814|1815|3066|3351|3359|5468|6531|7442	ADORA2A|BCHE|CDK5|CHRNB2|CNR1|DRD1|DRD2|DRD3|DRD4|HDAC2|HTR1B|HTR3A|PPARG|SLC6A3|TRPV1	-9.3
GO Biological Processes	GO:0001676	long-chain fatty acid metabolic process	-11	11	12	24367	109	306	15	4.9	1.2	239|240|246|1545|1557|1565|2053|2166|5595|5742|5743|6916|8399|8644|9536	ALOX12|ALOX5|ALOX15|CYP1B1|CYP2C19|CYP2D6|EPHX2|FAAH|MAPK3|PTGS1|PTGS2|TBXAS1|PLA2G10|AKR1C3|PTGES	-9.3
GO Biological Processes	GO:0019229	regulation of vasoconstriction	-11	16	13	24367	59	306	12	3.9	1.1	148|207|554|952|1131|1636|1889|1956|3269|3741|5724|5743	ADRA1A|AKT1|AVPR2|CD38|CHRM3|ACE|ECE1|EGFR|HRH1|KCNA5|PTAFR|PTGS2	-9.3
GO Biological Processes	GO:0009991	response to extracellular stimulus	-11	4.5	9.2	24367	534	306	30	9.8	1.7	136|154|207|383|558|590|1268|1956|2539|2629|3156|3291|3358|4316|4353|5292|5465|5467|5468|5595|5743|6532|6714|6715|6721|7299|7421|7442|8644|8658	ADORA2B|ADRB2|AKT1|ARG1|AXL|BCHE|CNR1|EGFR|G6PD|GBA|HMGCR|HSD11B2|HTR2C|MMP7|MPO|PIM1|PPARA|PPARD|PPARG|MAPK3|PTGS2|SLC6A4|SRC|SRD5A1|SREBF2|TYR|VDR|TRPV1|AKR1C3|TNKS	-9.2
GO Biological Processes	GO:0099504	synaptic vesicle cycle	-11	7.6	11	24367	199	306	19	6.2	1.4	135|136|148|1020|1129|1137|1138|1141|1142|1268|1759|1812|1813|2932|3351|6093|8851|8973|23621	ADORA2A|ADORA2B|ADRA1A|CDK5|CHRM2|CHRNA4|CHRNA5|CHRNB2|CHRNB3|CNR1|DNM1|DRD1|DRD2|GSK3B|HTR1B|ROCK1|CDK5R1|CHRNA6|BACE1	-9.2
GO Biological Processes	GO:0097237	cellular response to toxic substance	-11	6.7	10	24367	251	306	21	6.9	1.4	328|383|558|983|1545|2168|2741|3066|3791|4233|4353|5292|5580|5742|5743|6714|9429|10013|10280|10327|57016	APEX1|ARG1|AXL|CDK1|CYP1B1|FABP1|GLRA1|HDAC2|KDR|MET|MPO|PIM1|PRKCD|PTGS1|PTGS2|SRC|ABCG2|HDAC6|SIGMAR1|AKR1A1|AKR1B10	-9.2
GO Biological Processes	GO:0051937	catecholamine transport	-11	14	13	24367	75	306	13	4.2	1.2	135|1133|1137|1141|1268|1812|1813|1814|1815|3351|6530|6531|8973	ADORA2A|CHRM5|CHRNA4|CHRNB2|CNR1|DRD1|DRD2|DRD3|DRD4|HTR1B|SLC6A2|SLC6A3|CHRNA6	-9.2
GO Biological Processes	GO:0072511	divalent inorganic cation transport	-11	4.6	9.2	24367	501	306	29	9.5	1.7	135|148|816|1020|1137|1139|1141|1234|1394|1812|1813|1814|1815|2147|2539|2859|2864|2916|3357|3358|3958|4638|5294|5319|5743|5777|7421|7442|8989	ADORA2A|ADRA1A|CAMK2B|CDK5|CHRNA4|CHRNA7|CHRNB2|CCR5|CRHR1|DRD1|DRD2|DRD3|DRD4|F2|G6PD|GPR35|FFAR1|GRM6|HTR2B|HTR2C|LGALS3|MYLK|PIK3CG|PLA2G1B|PTGS2|PTPN6|VDR|TRPV1|TRPA1	-9.2
GO Biological Processes	GO:0034762	regulation of transmembrane transport	-11	4.3	9	24367	572	306	31	10	1.7	154|207|351|760|1020|1080|1394|1612|1812|1813|1814|1815|2147|2171|2539|2859|2915|3359|3643|3741|3757|4318|5243|5292|5294|5295|5319|5724|5777|6331|7015	ADRB2|AKT1|APP|CA2|CDK5|CFTR|CRHR1|DAPK1|DRD1|DRD2|DRD3|DRD4|F2|FABP5|G6PD|GPR35|GRM5|HTR3A|INSR|KCNA5|KCNH2|MMP9|ABCB1|PIM1|PIK3CG|PIK3R1|PLA2G1B|PTAFR|PTPN6|SCN5A|TERT	-9.2
GO Biological Processes	GO:0031348	negative regulation of defense response	-11	6.6	10	24367	252	306	21	6.9	1.4	134|135|240|383|1269|1588|1813|2147|2629|3558|3965|4321|5465|5467|5468|5580|5734|5771|6095|7376|10062	ADORA1|ADORA2A|ALOX5|ARG1|CNR2|CYP19A1|DRD2|F2|GBA|IL2|LGALS9|MMP12|PPARA|PPARD|PPARG|PRKCD|PTGER4|PTPN2|RORA|NR1H2|NR1H3	-9.2
GO Biological Processes	GO:0006352	DNA-templated transcription, initiation	-11	6.6	10	24367	253	306	21	6.9	1.4	367|891|983|2099|2100|2101|2908|4306|5241|5465|5467|5468|5595|6095|6097|7376|7421|8856|9970|10062|11176	AR|CCNB1|CDK1|ESR1|ESR2|ESRRA|NR3C1|NR3C2|PGR|PPARA|PPARD|PPARG|MAPK3|RORA|RORC|NR1H2|VDR|NR1I2|NR1I3|NR1H3|BAZ2A	-9.2
GO Biological Processes	GO:0046890	regulation of lipid biosynthetic process	-11	7.5	10	24367	202	306	19	6.2	1.4	207|949|1595|1717|2170|2171|2222|3156|3357|3358|5580|5743|6319|6713|6721|7376|7421|8644|10062	AKT1|SCARB1|CYP51A1|DHCR7|FABP3|FABP5|FDFT1|HMGCR|HTR2B|HTR2C|PRKCD|PTGS2|SCD|SQLE|SREBF2|NR1H2|VDR|AKR1C3|NR1H3	-9.1
GO Biological Processes	GO:0045776	negative regulation of blood pressure	-11	19	14	24367	47	306	11	3.6	1.1	134|148|154|1268|1813|1814|4843|5465|5724|6051|7442	ADORA1|ADRA1A|ADRB2|CNR1|DRD2|DRD3|NOS2|PPARA|PTAFR|RNPEP|TRPV1	-9.1
GO Biological Processes	GO:0071902	positive regulation of protein serine/threonine kinase activity	-11	5.6	9.6	24367	343	306	24	7.8	1.5	134|136|154|207|238|891|983|1139|1815|1956|2322|3357|3643|3717|5294|5319|5585|5595|5770|6714|6850|8654|8851|50507	ADORA1|ADORA2B|ADRB2|AKT1|ALK|CCNB1|CDK1|CHRNA7|DRD4|EGFR|FLT3|HTR2B|INSR|JAK2|PIK3CG|PLA2G1B|PKN1|MAPK3|PTPN1|SRC|SYK|PDE5A|CDK5R1|NOX4	-9.1
GO Biological Processes	GO:0097480	establishment of synaptic vesicle localization	-11	8.7	11	24367	156	306	17	5.6	1.3	135|136|148|1020|1129|1137|1138|1141|1142|1268|1759|1812|1813|2932|3351|8973|23621	ADORA2A|ADORA2B|ADRA1A|CDK5|CHRM2|CHRNA4|CHRNA5|CHRNB2|CHRNB3|CNR1|DNM1|DRD1|DRD2|GSK3B|HTR1B|CHRNA6|BACE1	-9.1
GO Biological Processes	GO:0055088	lipid homeostasis	-11	8.7	11	24367	156	306	17	5.6	1.3	134|949|1645|2053|2167|2170|5468|6095|6646|6721|7376|7421|8399|8435|8856|9970|10062	ADORA1|SCARB1|AKR1C1|EPHX2|FABP4|FABP3|PPARG|RORA|SOAT1|SREBF2|NR1H2|VDR|PLA2G10|SOAT2|NR1I2|NR1I3|NR1H3	-9.1
GO Biological Processes	GO:0048489	synaptic vesicle transport	-11	8.7	11	24367	156	306	17	5.6	1.3	135|136|148|1020|1129|1137|1138|1141|1142|1268|1759|1812|1813|2932|3351|8973|23621	ADORA2A|ADORA2B|ADRA1A|CDK5|CHRM2|CHRNA4|CHRNA5|CHRNB2|CHRNB3|CNR1|DNM1|DRD1|DRD2|GSK3B|HTR1B|CHRNA6|BACE1	-9.1
GO Biological Processes	GO:1900182	positive regulation of protein localization to nucleus	-11	13	12	24367	78	306	13	4.2	1.2	142|207|983|2147|3717|5295|5347|5580|5743|6469|6714|7015|8841	PARP1|AKT1|CDK1|F2|JAK2|PIK3R1|PLK1|PRKCD|PTGS2|SHH|SRC|TERT|HDAC3	-9
GO Biological Processes	GO:0046879	hormone secretion	-11	5.8	9.7	24367	316	306	23	7.5	1.5	134|135|952|1080|1136|1268|1394|1588|1803|1813|1956|2864|3091|3156|3350|3358|3717|3741|4843|5467|5578|5950|5972	ADORA1|ADORA2A|CD38|CFTR|CHRNA3|CNR1|CRHR1|CYP19A1|DPP4|DRD2|EGFR|FFAR1|HIF1A|HMGCR|HTR1A|HTR2C|JAK2|KCNA5|NOS2|PPARD|PRKCA|RBP4|REN	-9
GO Biological Processes	GO:0007169	transmembrane receptor protein tyrosine kinase signaling pathway	-11	3.8	8.6	24367	737	306	35	11	1.8	134|154|207|238|351|367|558|1136|1759|1956|2322|2932|3091|3480|3643|3690|3717|3718|3791|4233|4313|4318|5295|5578|5580|5595|5747|5770|5771|6093|6714|6850|7498|8851|9475	ADORA1|ADRB2|AKT1|ALK|APP|AR|AXL|CHRNA3|DNM1|EGFR|FLT3|GSK3B|HIF1A|IGF1R|INSR|ITGB3|JAK2|JAK3|KDR|MET|MMP2|MMP9|PIK3R1|PRKCA|PRKCD|MAPK3|PTK2|PTPN1|PTPN2|ROCK1|SRC|SYK|XDH|CDK5R1|ROCK2	-9
GO Biological Processes	GO:0048638	regulation of developmental growth	-11	5.5	9.5	24367	350	306	24	7.8	1.5	154|207|351|367|891|983|1020|1813|1814|2539|2932|3643|3776|4137|5292|5465|5467|5747|5802|5950|6531|6532|8851|80351	ADRB2|AKT1|APP|AR|CCNB1|CDK1|CDK5|DRD2|DRD3|G6PD|GSK3B|INSR|KCNK2|MAPT|PIM1|PPARA|PPARD|PTK2|PTPRS|RBP4|SLC6A3|SLC6A4|CDK5R1|TNKS2	-8.9
GO Biological Processes	GO:0046683	response to organophosphorus	-11	9.2	11	24367	138	306	16	5.2	1.3	196|328|351|1080|1645|5294|5322|5724|5743|5972|6531|6532|6715|7299|7442|50507	AHR|APEX1|APP|CFTR|AKR1C1|PIK3CG|PLA2G5|PTAFR|PTGS2|REN|SLC6A3|SLC6A4|SRD5A1|TYR|TRPV1|NOX4	-8.9
GO Biological Processes	GO:0002683	negative regulation of immune system process	-11	4.6	9.1	24367	483	306	28	9.2	1.6	134|135|207|246|383|558|1021|1268|1269|1588|1803|1813|3558|3718|3958|3965|4321|5295|5468|5585|5734|5771|5777|5802|6469|7376|8654|10062	ADORA1|ADORA2A|AKT1|ALOX15|ARG1|AXL|CDK6|CNR1|CNR2|CYP19A1|DPP4|DRD2|IL2|JAK3|LGALS3|LGALS9|MMP12|PIK3R1|PPARG|PKN1|PTGER4|PTPN2|PTPN6|PTPRS|SHH|NR1H2|PDE5A|NR1H3	-8.9
GO Biological Processes	GO:0071715	icosanoid transport	-11	18	13	24367	50	306	11	3.6	1.1	1636|1813|1814|1815|4363|4843|5319|5322|6850|8399|391013	ACE|DRD2|DRD3|DRD4|ABCC1|NOS2|PLA2G1B|PLA2G5|SYK|PLA2G10|PLA2G2C	-8.8
GO Biological Processes	GO:1901571	fatty acid derivative transport	-11	18	13	24367	50	306	11	3.6	1.1	1636|1813|1814|1815|4363|4843|5319|5322|6850|8399|391013	ACE|DRD2|DRD3|DRD4|ABCC1|NOS2|PLA2G1B|PLA2G5|SYK|PLA2G10|PLA2G2C	-8.8
GO Biological Processes	GO:0035095	behavioral response to nicotine	-11	68	20	24367	7	306	6	2	0.79	1136|1137|1138|1141|1143|5465	CHRNA3|CHRNA4|CHRNA5|CHRNB2|CHRNB4|PPARA	-8.8
GO Biological Processes	GO:2001023	regulation of response to drug	-11	11	12	24367	99	306	14	4.6	1.2	135|383|1136|1137|1141|1268|1812|1813|1814|1815|3351|4233|8973|10013	ADORA2A|ARG1|CHRNA3|CHRNA4|CHRNB2|CNR1|DRD1|DRD2|DRD3|DRD4|HTR1B|MET|CHRNA6|HDAC6	-8.8
GO Biological Processes	GO:0032800	receptor biosynthetic process	-11	27	15	24367	27	306	9	2.9	0.97	43|3066|3091|3690|3717|5465|5468|10013|10062	ACHE|HDAC2|HIF1A|ITGB3|JAK2|PPARA|PPARG|HDAC6|NR1H3	-8.8
GO Biological Processes	GO:0098810	neurotransmitter reuptake	-11	27	15	24367	27	306	9	2.9	0.97	1812|1813|1814|1815|2030|3690|6530|6531|6532	DRD1|DRD2|DRD3|DRD4|SLC29A1|ITGB3|SLC6A2|SLC6A3|SLC6A4	-8.8
GO Biological Processes	GO:0007588	excretion	-11	15	12	24367	65	306	12	3.9	1.1	134|135|136|148|554|1136|1141|1143|1813|1814|7442|9429	ADORA1|ADORA2A|ADORA2B|ADRA1A|AVPR2|CHRNA3|CHRNB2|CHRNB4|DRD2|DRD3|TRPV1|ABCG2	-8.8
GO Biological Processes	GO:0033002	muscle cell proliferation	-11	6.6	9.9	24367	240	306	20	6.5	1.4	207|231|239|891|983|1956|3156|3351|3717|3776|4313|4318|5292|5467|5468|5724|5743|5950|6469|7015	AKT1|AKR1B1|ALOX12|CCNB1|CDK1|EGFR|HMGCR|HTR1B|JAK2|KCNK2|MMP2|MMP9|PIM1|PPARD|PPARG|PTAFR|PTGS2|RBP4|SHH|TERT	-8.7
GO Biological Processes	GO:0071375	cellular response to peptide hormone stimulus	-10	5.6	9.4	24367	327	306	23	7.5	1.5	142|207|328|383|760|1394|2101|2932|3480|3643|3717|3718|5295|5319|5468|5580|5747|5770|5771|6093|6714|6715|9475	PARP1|AKT1|APEX1|ARG1|CA2|CRHR1|ESRRA|GSK3B|IGF1R|INSR|JAK2|JAK3|PIK3R1|PLA2G1B|PPARG|PRKCD|PTK2|PTPN1|PTPN2|ROCK1|SRC|SRD5A1|ROCK2	-8.7
GO Biological Processes	GO:0030155	regulation of cell adhesion	-10	3.8	8.5	24367	716	306	34	11	1.8	135|207|239|246|383|1021|1545|1803|2932|3558|3716|3717|3718|3791|3958|3965|4321|5294|5295|5340|5465|5578|5580|5724|5747|5771|5777|6093|6469|6714|6850|8654|9475|9891	ADORA2A|AKT1|ALOX12|ALOX15|ARG1|CDK6|CYP1B1|DPP4|GSK3B|IL2|JAK1|JAK2|JAK3|KDR|LGALS3|LGALS9|MMP12|PIK3CG|PIK3R1|PLG|PPARA|PRKCA|PRKCD|PTAFR|PTK2|PTPN2|PTPN6|ROCK1|SHH|SRC|SYK|PDE5A|ROCK2|NUAK1	-8.7
GO Biological Processes	GO:0010878	cholesterol storage	-10	34	16	24367	19	306	8	2.6	0.91	949|5465|5467|5468|6646|6721|7376|10062	SCARB1|PPARA|PPARD|PPARG|SOAT1|SREBF2|NR1H2|NR1H3	-8.6
GO Biological Processes	GO:0097479	synaptic vesicle localization	-10	8.1	10	24367	167	306	17	5.6	1.3	135|136|148|1020|1129|1137|1138|1141|1142|1268|1759|1812|1813|2932|3351|8973|23621	ADORA2A|ADORA2B|ADRA1A|CDK5|CHRM2|CHRNA4|CHRNA5|CHRNB2|CHRNB3|CNR1|DNM1|DRD1|DRD2|GSK3B|HTR1B|CHRNA6|BACE1	-8.6
GO Biological Processes	GO:0003006	developmental process involved in reproduction	-10	3.8	8.5	24367	683	306	33	11	1.8	207|367|558|891|994|1080|1508|1586|1588|1956|2099|3091|3293|3294|3643|4311|5241|5340|5467|5468|5595|5743|5747|5777|5950|5972|6469|6714|6715|6716|7421|8644|8654	AKT1|AR|AXL|CCNB1|CDC25B|CFTR|CTSB|CYP17A1|CYP19A1|EGFR|ESR1|HIF1A|HSD17B3|HSD17B2|INSR|MME|PGR|PLG|PPARD|PPARG|MAPK3|PTGS2|PTK2|PTPN6|RBP4|REN|SHH|SRC|SRD5A1|SRD5A2|VDR|AKR1C3|PDE5A	-8.6
GO Biological Processes	GO:0003014	renal system process	-10	9.7	11	24367	123	306	15	4.9	1.2	134|135|148|231|554|1136|1141|1143|1813|1814|3291|5585|5972|7442|8644	ADORA1|ADORA2A|ADRA1A|AKR1B1|AVPR2|CHRNA3|CHRNB2|CHRNB4|DRD2|DRD3|HSD11B2|PKN1|REN|TRPV1|AKR1C3	-8.6
GO Biological Processes	GO:2000379	positive regulation of reactive oxygen species metabolic process	-10	11	11	24367	103	306	14	4.6	1.2	207|1956|2147|3643|3717|4137|4317|5580|5743|6850|7442|7498|8644|50507	AKT1|EGFR|F2|INSR|JAK2|MAPT|MMP8|PRKCD|PTGS2|SYK|TRPV1|XDH|AKR1C3|NOX4	-8.6
GO Biological Processes	GO:0080135	regulation of cellular response to stress	-10	3.6	8.4	24367	765	306	35	11	1.8	142|207|351|816|1021|1956|2932|3091|3156|3480|3776|3965|4137|4170|4233|4314|4317|5295|5580|5585|5595|5743|5770|5771|5792|5802|6850|7015|7498|8841|9475|9891|10013|10783|83933	PARP1|AKT1|APP|CAMK2B|CDK6|EGFR|GSK3B|HIF1A|HMGCR|IGF1R|KCNK2|LGALS9|MAPT|MCL1|MET|MMP3|MMP8|PIK3R1|PRKCD|PKN1|MAPK3|PTGS2|PTPN1|PTPN2|PTPRF|PTPRS|SYK|TERT|XDH|HDAC3|ROCK2|NUAK1|HDAC6|NEK6|HDAC10	-8.6
GO Biological Processes	GO:0040008	regulation of growth	-10	3.8	8.5	24367	686	306	33	11	1.8	154|207|351|367|891|952|983|1020|1457|1813|1814|1956|2100|2147|2539|2932|3091|3558|3643|3776|4137|5292|5465|5467|5468|5747|5802|5950|6531|6532|8851|9133|80351	ADRB2|AKT1|APP|AR|CCNB1|CD38|CDK1|CDK5|CSNK2A1|DRD2|DRD3|EGFR|ESR2|F2|G6PD|GSK3B|HIF1A|IL2|INSR|KCNK2|MAPT|PIM1|PPARA|PPARD|PPARG|PTK2|PTPRS|RBP4|SLC6A3|SLC6A4|CDK5R1|CCNB2|TNKS2	-8.6
GO Biological Processes	GO:0042220	response to cocaine	-10	17	13	24367	53	306	11	3.6	1.1	1020|1141|1268|1812|1813|1814|1815|3066|3351|3359|6531	CDK5|CHRNB2|CNR1|DRD1|DRD2|DRD3|DRD4|HDAC2|HTR1B|HTR3A|SLC6A3	-8.5
GO Biological Processes	GO:0010959	regulation of metal ion transport	-10	5	9.1	24367	398	306	25	8.2	1.6	134|135|154|207|816|1020|1394|1812|1813|1814|1815|2147|2539|2859|2864|2916|3741|3757|3958|4638|5294|5319|5743|5777|6331	ADORA1|ADORA2A|ADRB2|AKT1|CAMK2B|CDK5|CRHR1|DRD1|DRD2|DRD3|DRD4|F2|G6PD|GPR35|FFAR1|GRM6|KCNA5|KCNH2|LGALS3|MYLK|PIK3CG|PLA2G1B|PTGS2|PTPN6|SCN5A	-8.5
GO Biological Processes	GO:0031667	response to nutrient levels	-10	4.5	8.8	24367	501	306	28	9.2	1.6	154|207|383|590|1268|1956|2539|2629|3156|3291|3358|4316|4353|5292|5465|5467|5468|5595|5743|6532|6714|6715|6721|7299|7421|7442|8644|8658	ADRB2|AKT1|ARG1|BCHE|CNR1|EGFR|G6PD|GBA|HMGCR|HSD11B2|HTR2C|MMP7|MPO|PIM1|PPARA|PPARD|PPARG|MAPK3|PTGS2|SLC6A4|SRC|SRD5A1|SREBF2|TYR|VDR|TRPV1|AKR1C3|TNKS	-8.5
GO Biological Processes	GO:0042060	wound healing	-10	4.1	8.6	24367	576	306	30	9.8	1.7	135|239|246|558|891|949|1956|2147|3066|3091|3156|3674|3690|3717|4321|4638|5294|5295|5340|5465|5467|5578|5580|5595|5747|5777|6469|6714|6850|23173	ADORA2A|ALOX12|ALOX15|AXL|CCNB1|SCARB1|EGFR|F2|HDAC2|HIF1A|HMGCR|ITGA2B|ITGB3|JAK2|MMP12|MYLK|PIK3CG|PIK3R1|PLG|PPARA|PPARD|PRKCA|PRKCD|MAPK3|PTK2|PTPN6|SHH|SRC|SYK|METAP1	-8.5
GO Biological Processes	GO:0019233	sensory perception of pain	-10	11	11	24367	105	306	14	4.6	1.2	134|1020|1137|1141|1268|1269|2171|4311|5595|5724|5743|7442|8989|23621	ADORA1|CDK5|CHRNA4|CHRNB2|CNR1|CNR2|FABP5|MME|MAPK3|PTAFR|PTGS2|TRPV1|TRPA1|BACE1	-8.5
GO Biological Processes	GO:0070542	response to fatty acid	-10	12	11	24367	87	306	13	4.2	1.2	207|891|1646|2170|2864|5468|5724|5732|5734|5743|6319|6714|8644	AKT1|CCNB1|AKR1C2|FABP3|FFAR1|PPARG|PTAFR|PTGER2|PTGER4|PTGS2|SCD|SRC|AKR1C3	-8.4
GO Biological Processes	GO:0042136	neurotransmitter biosynthetic process	-10	11	11	24367	106	306	14	4.6	1.2	43|207|1545|3643|3717|4317|4843|5743|6095|6531|6532|6582|7442|9475	ACHE|AKT1|CYP1B1|INSR|JAK2|MMP8|NOS2|PTGS2|RORA|SLC6A3|SLC6A4|SLC22A2|TRPV1|ROCK2	-8.4
GO Biological Processes	GO:2000147	positive regulation of cell motility	-10	4.1	8.5	24367	584	306	30	9.8	1.7	207|239|351|949|1812|1956|3091|3480|3643|3674|3690|3717|3791|3958|3965|4233|4318|4638|5295|5578|5595|5724|5743|5747|6714|6869|7015|9475|10013|50507	AKT1|ALOX12|APP|SCARB1|DRD1|EGFR|HIF1A|IGF1R|INSR|ITGA2B|ITGB3|JAK2|KDR|LGALS3|LGALS9|MET|MMP9|MYLK|PIK3R1|PRKCA|MAPK3|PTAFR|PTGS2|PTK2|SRC|TACR1|TERT|ROCK2|HDAC6|NOX4	-8.3
GO Biological Processes	GO:0001659	temperature homeostasis	-10	7.8	10	24367	174	306	17	5.6	1.3	43|134|154|1268|1812|1813|2167|2171|3480|3717|5743|6319|6850|7376|7442|8841|10062	ACHE|ADORA1|ADRB2|CNR1|DRD1|DRD2|FABP4|FABP5|IGF1R|JAK2|PTGS2|SCD|SYK|NR1H2|TRPV1|HDAC3|NR1H3	-8.3
GO Biological Processes	GO:0009416	response to light stimulus	-10	5.6	9.3	24367	312	306	22	7.2	1.5	142|207|351|993|1020|1141|1812|1813|1814|1956|2339|2342|2916|3091|3156|3269|4311|5295|5743|7299|9212|23173	PARP1|AKT1|APP|CDC25A|CDK5|CHRNB2|DRD1|DRD2|DRD3|EGFR|FNTA|FNTB|GRM6|HIF1A|HMGCR|HRH1|MME|PIK3R1|PTGS2|TYR|AURKB|METAP1	-8.3
GO Biological Processes	GO:0051235	maintenance of location	-10	5.3	9.1	24367	343	306	23	7.5	1.5	207|949|1020|1234|1812|1813|2147|3357|3358|3690|5465|5467|5468|5771|5777|6646|6713|6721|7376|7442|8399|8989|10062	AKT1|SCARB1|CDK5|CCR5|DRD1|DRD2|F2|HTR2B|HTR2C|ITGB3|PPARA|PPARD|PPARG|PTPN2|PTPN6|SOAT1|SQLE|SREBF2|NR1H2|TRPV1|PLA2G10|TRPA1|NR1H3	-8.3
GO Biological Processes	GO:0014065	phosphatidylinositol 3-kinase signaling	-10	8.4	10	24367	152	306	16	5.2	1.3	207|1956|2147|2322|3357|3480|3643|3717|3791|5294|5295|5467|5595|5747|5777|6714	AKT1|EGFR|F2|FLT3|HTR2B|IGF1R|INSR|JAK2|KDR|PIK3CG|PIK3R1|PPARD|MAPK3|PTK2|PTPN6|SRC	-8.3
GO Biological Processes	GO:0007197	adenylate cyclase-inhibiting G protein-coupled acetylcholine receptor signaling pathway	-10	60	19	24367	8	306	6	2	0.79	1128|1129|1131|1132|1133|59340	CHRM1|CHRM2|CHRM3|CHRM4|CHRM5|HRH4	-8.2
[truncated: 2,774 more rows]

## Sheet: Table S5
Table S5. KnownOA-relatedtargets
[truncated: 496 more rows]

## Sheet: Table S6
Table S6. GO and KEGG pathway enrichment analyses of the OA-related targets
[truncated: 4,696 more rows]

## Sheet: Table S7
Table S7. 64 common targets between CSMFCH and OA
[truncated: 65 more rows]

[truncated: 8 more sheets: Table S8, Table S9, Table S10, Table S11, Table S12, Table S13, Table S14, Table S15]
